# Supplementary material
Source: publisher figshare collection journal article supplement (https://gsajournals.figshare.com/ndownloader/files/25917480)
Supplement: Supplementary file 1 [file 25917480]

## Sheet: Avg Expression
FBgn	BUR24	BUR6	BURU	FB24	FB6	FBU	OVD24	OVD6	OVDU	PO24	PO6	POU	SR24	SR6	SRU	ST24	ST6	STU	WF
FBgn0014931	0.952178	0.639311	0.700616	1.84663	2.39524	2.08695	1.33793	1.57784	1.34728	0.688539	0.798802	0.989928	1.45736	1.15368	1.35562	0.514083	0.408864	0.772661	2.29833
FBgn0014930	4.91687	4.75287	4.63574	6.25797	5.97003	5.89962	4.67386	4.72821	4.57491	5.27016	5.45995	5.03817	4.59702	4.50628	4.6574	5.21076	5.19991	5.36616	4.13502
FBgn0027562	3.28074	2.99564	2.45451	0	0	0	0.142063	0.0466317	0.276158	0.183681	0.10323	0	0.0200131	0.118079	0.0694971	0	0.0855775	0.0254119	2.45935
FBgn0027563	2.50753	2.8508	2.51454	7.1217	7.05401	6.60736	1.50694	2.31341	1.52454	2.0871	3.1416	2.38413	2.60656	2.94501	2.38242	2.24389	2.58547	2.32087	2.33402
FBgn0027560	6.78497	7.02493	7.09949	12.6154	12.1916	12.6705	7.13032	7.75443	7.72924	8.6589	8.83351	9.20299	8.1478	8.12068	8.55603	8.33992	7.95119	8.81518	7.32846
FBgn0027561	4.70566	4.76783	4.89028	4.00569	4.60647	4.04799	5.26021	4.90932	5.18213	5.1426	4.88882	5.08131	4.97191	5.01556	5.03276	4.90447	5.04972	4.94332	5.5857
FBgn0027567	4.62805	5.04598	4.84706	4.13464	4.97942	4.96045	5.27179	4.9833	5.2118	5.27171	4.968	5.30515	4.97261	4.90031	4.97205	5.34061	5.23319	5.46729	7.39045
FBgn0027564	4.8286	5.48084	4.53727	6.28245	6.06406	5.7733	4.46985	4.87384	4.3817	4.59661	4.97189	4.45646	4.50867	4.96233	4.3766	4.86096	5.47338	5.11322	4.82939
FBgn0027565	4.40314	3.54345	4.27158	3.74281	3.58563	3.68418	4.73252	3.89634	4.46729	4.06655	3.90862	3.89668	3.87026	3.34545	3.76176	4.509	4.34776	4.36326	4.5135
FBgn0027568	4.35437	4.20873	4.49669	3.44107	4.11269	3.69639	4.47042	4.13558	4.63725	5.05903	4.877	5.00578	4.56603	4.60062	4.73103	4.88329	4.98342	5.01045	5.34703
FBgn0027569	3.90138	4.09872	3.88463	3.96049	4.29923	4.21357	3.87979	3.89863	3.90951	4.5488	4.56038	4.59946	4.29109	4.29756	4.28011	4.56132	4.59366	4.85549	4.55933
FBgn0010438	3.3199	4.30024	3.26521	3.60944	4.09491	4.28076	3.17063	4.07234	3.43166	3.32517	3.51537	3.17757	3.69304	3.89323	3.47142	3.60391	3.46647	3.36477	6.09541
FBgn0037356	5.32409	5.43188	4.97822	7.06197	6.79103	6.81655	4.49844	4.65333	4.43003	3.49982	3.91247	3.49641	4.22541	4.24894	4.1588	3.51303	3.59776	3.54577	4.66586
FBgn0262057	6.98696	7.22972	6.85287	7.2926	7.06518	7.05963	6.2615	6.29629	6.04829	4.93597	5.05758	4.74703	5.88302	6.39161	6.02866	5.32979	4.96014	5.00639	3.40833
FBgn0030645	3.33557	3.56973	3.08805	3.68768	3.46541	3.43307	3.07662	3.13888	2.85075	3.72022	3.81662	3.22598	3.10534	3.1174	2.94993	3.35353	3.65564	3.30591	3.53352
FBgn0085218	1.01235	1.52219	0.743717	2.88143	2.01652	1.84379	1.41669	1.59541	0.992483	7.5673	7.66612	7.44035	2.79419	2.6198	2.78295	1.60323	0.995133	1.11646	0
FBgn0010435	6.62396	5.99753	6.3012	5.60584	5.02241	5.41921	4.26176	4.13063	4.29797	7.68773	7.13879	7.44155	5.15199	5.1954	5.42526	5.95624	5.62265	5.57366	3.89088
FBgn0259482	5.13835	4.66242	5.00796	4.03442	3.98417	5.1	5.08038	4.9858	4.83757	4.73839	4.58865	4.66471	4.91157	4.50631	4.53019	5.00645	5.04611	4.94258	3.31872
FBgn0033579	1.80147	0.763609	1.68102	0	0	0	0.329856	0.171023	0.396184	0.372178	0.26608	0.343666	0.311121	0.181692	0.287929	0.726392	0.160116	0.474784	0.0593216
FBgn0085212	2.52705	2.70933	2.4161	2.49801	2.19112	2.18739	2.43076	2.56378	2.13555	2.50205	2.35258	1.97317	2.48642	2.51703	2.26564	2.33874	2.58441	2.05533	2.24208
FBgn0033434	5.53856	5.60339	5.35338	3.82754	4.59719	4.87927	5.40922	5.65083	5.18668	4.67949	4.70055	4.57168	5.3449	5.58948	5.28899	4.7418	4.96931	4.78443	3.63016
FBgn0036117	3.3279	3.20654	3.09205	3.41307	3.42061	3.69427	3.37586	3.44397	3.27203	1.91715	2.17789	1.93952	3.11888	2.80902	2.82246	2.10875	2.26883	2.18712	3.43432
FBgn0036111	5.69666	4.71738	5.59005	4.06192	3.81712	3.65652	6.39996	5.32896	5.87894	6.25938	5.17458	5.76757	5.83511	5.36624	5.92452	5.78775	4.96508	4.93595	5.91797
FBgn0033439	0.390185	0.366903	0.361417	3.94973	3.8416	4.23791	0.471218	0.91558	0.472663	0.884754	1.55435	1.33488	0.868936	1.03779	0.856639	0.914751	0.794369	0.790227	0.355163
FBgn0033438	1.37266	1.36941	1.73335	0	0.945142	0.553229	1.99986	3.08483	1.78737	1.24901	1.11415	1.03247	3.82606	4.1584	4.1606	0.807864	0.521984	0.466221	1.89893
FBgn0032082	0.303328	0.0925094	0.186066	0	0.260751	0	0.620495	1.24197	0.586144	1.25608	1.54791	1.06346	1.01493	0.975741	0.889803	4.69468	4.88886	4.08341	0.534025
FBgn0040752	4.74514	4.42204	4.95543	0.256309	0.559732	0.741525	7.35044	6.28513	6.86778	6.44167	5.40033	5.8991	5.36318	5.40045	5.38306	6.85445	6.0015	5.99514	4.73184
FBgn0029174	5.69474	6.24177	5.43037	7.13794	6.8269	7.23007	5.22489	5.78363	5.24581	5.27905	5.589	5.33558	5.65976	5.67155	5.41574	5.66352	5.39033	5.53175	7.87373
FBgn0040754	5.82071	5.57509	5.45277	5.6831	5.20469	5.7978	5.5203	5.48804	4.94828	5.20533	5.0347	4.89012	5.50314	5.26045	5.42315	4.8041	4.9866	4.79054	3.40998
FBgn0010043	0.183175	0.214051	0.0645418	0.696192	0.0910531	0.383252	0.219944	0.0427529	0.124732	3.36279	2.61978	2.36224	0.323963	0.22063	0.182083	2.6556	1.7616	1.83286	0.897956
FBgn0036090	3.05684	2.50863	2.98456	1.30432	2.30767	1.52143	3.48717	3.25531	3.29837	3.40495	3.36501	3.29764	3.95217	3.65043	4.03574	2.9994	3.09418	2.89274	2.08452
FBgn0038244	4.28944	4.27081	4.71051	3.05734	4.07739	4.17308	4.50398	4.37492	4.75568	4.8226	4.61741	4.77659	4.53117	4.55227	4.57568	5.0272	4.90114	5.07897	6.82436
FBgn0038243	7.21242	7.8617	7.08029	5.40165	5.04156	4.93318	5.1291	5.90445	5.18963	4.41542	5.48576	5.48838	6.62087	6.43031	6.2446	5.1871	5.1101	5.43138	2.54854
FBgn0029170	3.68617	3.43026	3.5301	0.230865	0	0.0760569	1.09637	0.88391	1.14863	1.05448	0.849196	0.597824	1.56073	1.58862	1.75989	0.550037	0.287429	0.346777	0.224303
FBgn0032864	5.67479	4.87948	5.78687	7.57726	7.48572	8.33631	5.4032	5.30323	5.5118	4.43555	5.14512	5.0891	6.18936	6.11581	6.30658	4.48196	4.46483	4.76117	5.92114
FBgn0036094	0.806697	0.696977	0.963078	1.242	1.30482	1.40463	1.53592	1.40471	1.49431	0.715042	0.469177	0.613598	0.948013	0.946262	1.24766	0.340722	0.24102	0.31821	0.219758
FBgn0036373	4.25578	3.97212	4.25836	2.37276	3.17652	3.51318	4.42381	3.96054	4.31828	4.78193	4.65776	4.82412	3.94395	3.91441	4.04679	4.38595	4.51023	4.69495	5.02888
FBgn0036374	2.15272	2.02839	2.46747	0.965972	1.63198	1.0519	3.45108	2.28195	3.12688	3.44842	3.14137	3.35626	2.56238	2.82419	2.65506	3.1716	3.14276	3.05362	4.21425
FBgn0036377	3.19375	3.77639	3.06647	0	0.0946517	0.122888	2.14137	2.13416	1.96681	0.740012	1.0432	0.527179	2.47776	3.41579	2.23358	0.803044	0.981964	0.43433	0.21833
FBgn0036376	4.72305	4.66474	4.90919	2.61437	3.57954	2.74896	4.91879	4.66408	5.08016	4.95137	4.65994	4.89317	4.83357	4.70507	4.90195	4.95792	4.84477	4.8049	4.41837
FBgn0051908	5.05867	5.12642	5.1874	4.33848	5.09219	5.17791	5.25289	5.33309	5.36403	5.17327	5.10828	5.17073	4.93043	5.1841	5.11685	5.34401	5.46333	5.50967	5.6375
FBgn0051729	6.80378	6.41525	6.91783	4.44637	5.41258	5.56263	6.96683	6.75469	6.81395	7.21702	6.92372	7.19119	6.79313	6.85783	6.94583	7.6333	7.65198	7.84749	5.75836
FBgn0005617	2.42514	2.24919	2.70349	1.26725	1.92376	1.24966	3.29973	2.51533	3.2552	3.28706	2.86613	3.06379	2.83822	2.61537	2.7868	3.19619	2.65419	2.47498	3.93796
FBgn0005612	2.88058	2.26828	3.10943	2.80798	3.35622	2.91352	4.27786	3.08338	3.90658	4.11972	3.59846	4.10589	3.35687	3.0334	3.57224	3.68934	3.56455	3.34699	2.44378
FBgn0025809	3.59602	3.27975	3.53711	1.20927	2.03348	1.42253	3.83016	3.82968	3.75868	3.63298	3.37214	3.54967	3.61611	3.42026	3.43618	3.2328	3.233	3.1163	3.01449
FBgn0027338	7.00425	7.0536	7.14128	6.2236	7.62594	7.60866	7.24867	7.23111	7.22644	7.23805	6.98994	7.25384	6.96117	6.95845	7.05521	7.40121	7.34442	7.57753	7.35526
FBgn0039419	2.78614	2.77495	2.80513	1.49157	1.01895	0.640885	3.13649	2.67342	2.62485	2.92218	2.60889	2.47689	1.42363	1.51612	1.29713	1.39948	1.51846	0.95741	0.812261
FBgn0262353	4.45959	4.59425	4.19878	6.32065	5.09474	6.8086	3.47041	3.57113	3.27769	3.38529	2.97106	3.60429	4.10176	3.97293	3.62712	2.61963	2.55355	2.52478	1.00827
FBgn0260933	1.53781	2.00838	1.95936	0.662896	0.383478	0	0.757129	0.763629	1.05122	0.967968	0.591006	0.961243	0.785887	1.00637	1.43842	1.07769	0.979624	1.40376	1.50943
FBgn0035876	2.35579	2.16922	2.18699	3.17921	3.36005	3.6166	2.28246	2.20515	2.18253	3.06817	3.24391	3.05285	2.61328	2.68701	2.50377	2.77985	3.21713	2.85511	2.79644
FBgn0035875	0.645163	0.329533	1.08708	0	0	0	0.202147	0.104597	0.445389	2.08467	1.69448	1.95447	0.487227	0.300387	0.702657	5.26464	4.00231	5.12668	0
FBgn0035872	4.03532	4.08048	4.13178	4.23275	4.51515	4.52728	4.32541	4.03039	4.38075	4.46322	4.70319	4.56922	4.17895	4.46248	4.29737	4.69642	5.03553	5.02851	7.38381
FBgn0035871	7.81693	7.9179	7.36518	8.87565	8.19583	8.43618	7.6254	7.51884	6.98246	8.2554	8.19489	7.85685	7.47753	7.8107	7.47342	7.36441	8.1721	7.59117	6.4073
FBgn0028646	5.5738	5.51584	5.72891	7.70165	8.45268	8.69605	5.9804	5.94671	6.07742	6.20838	6.47608	6.41229	6.57248	6.9384	6.81895	6.51992	6.70254	6.61377	6.21611
FBgn0028648	3.73981	4.05372	3.7734	3.37402	3.93955	4.05746	3.75116	3.92727	3.75977	3.2043	3.43748	3.23685	3.53908	3.78778	3.58911	3.41493	3.38294	3.23931	4.29971
FBgn0025549	3.17039	2.83627	3.12043	3.55532	2.96338	2.6008	3.8009	3.24738	3.47815	4.54949	3.66175	4.1244	3.7732	3.42105	3.59144	3.78832	3.38609	3.23536	4.03406
FBgn0032478	1.78322	1.07082	1.39246	0	0.349996	0.623478	1.13249	0.902798	1.62256	2.27545	2.31359	1.58721	1.75923	1.42894	1.41269	2.56748	2.54555	2.353	0.0973174
FBgn0032479	5.5025	4.62052	5.77266	4.00733	4.84966	4.88528	5.19866	4.55717	5.34618	5.6488	5.28503	5.6691	4.79921	4.49746	4.75749	5.61949	5.69434	5.85009	6.37781
FBgn0032477	2.85711	2.77898	3.05407	2.66472	4.05003	3.24035	3.47582	3.31788	3.43813	5.45192	5.51719	5.2758	3.46121	4.14003	3.54321	4.8697	5.48992	4.93255	2.38338
FBgn0032474	5.581	5.61296	5.45974	4.03328	3.45888	3.87306	5.13656	5.32275	5.18713	4.69413	4.8319	4.64776	5.073	5.10898	5.07755	4.6394	4.79721	4.60455	5.07854
FBgn0032475	3.57654	3.34631	3.70085	1.74171	2.77556	2.85506	3.89824	3.50724	4.02507	4.36098	3.87284	4.31595	3.58262	3.66231	3.71559	4.20555	4.41716	4.50879	5.65376
FBgn0039350	4.18121	3.44462	4.1974	1.33498	1.84558	2.53773	4.51703	3.88975	4.55851	4.30855	4.18183	3.95574	4.48944	3.76474	4.2367	4.33496	4.12363	4.42306	6.98605
FBgn0086898	2.75302	2.25365	2.91734	0	0.15447	0.300953	1.70518	1.22936	1.83261	2.15369	1.98093	2.19147	2.13846	2.13246	2.63307	1.96186	1.9131	1.8846	2.72223
FBgn0086895	2.13605	2.23386	2.35527	1.34687	2.00413	1.13355	2.48094	2.31749	2.63018	2.53305	2.75182	2.37748	2.48738	2.54634	2.44422	2.70186	2.79589	2.34429	4.18545
FBgn0003048	2.57887	2.48341	2.83687	2.08712	2.31019	1.64694	3.92021	2.98992	3.73265	3.89351	3.23106	3.55122	3.23088	3.53182	3.44671	3.43933	3.19679	2.9153	3.4734
FBgn0003511	2.73458	3.33641	2.6569	2.29805	2.25961	2.38356	2.38453	2.6786	2.62313	2.10355	2.55189	2.13879	2.69583	2.46946	2.34655	2.80389	2.81384	2.59205	5.08856
FBgn0003510	1.45829	1.3402	1.28089	2.07615	1.74874	1.81309	1.13564	1.40349	1.18948	1.76711	1.82688	1.50533	1.78718	1.14479	1.24987	1.65385	1.62701	1.85508	1.74729
FBgn0003512	4.28818	4.75267	4.07697	5.14908	4.87411	5.26277	3.78739	4.30414	3.89356	3.8652	4.13181	3.81225	3.82583	3.90687	3.64572	4.15063	4.47777	4.26104	5.50258
FBgn0003514	7.61376	8.11327	7.13269	4.85967	5.06179	5.28543	7.42629	7.83907	6.83309	7.7405	7.58092	7.50982	7.47207	7.86834	7.03793	7.54529	7.73202	7.65761	5.75621
FBgn0003041	4.46672	4.3836	3.78825	0	0.124871	0.209311	3.4789	2.97085	2.88907	1.90527	1.70779	1.10323	4.23656	4.36235	3.89046	2.01118	1.29408	1.42441	5.55604
FBgn0042627	0.943947	1.2681	1.00663	5.08342	5.11222	5.77382	0.957581	1.45677	1.40345	2.38071	2.51574	2.52652	1.75769	1.96029	2.07193	1.69089	1.70588	2.04762	5.16369
FBgn0053460	0.682678	0.714878	0.876088	5.05695	4.06891	4.99497	1.40398	1.89182	1.15032	1.44946	1.83807	1.57108	4.05503	3.76225	3.83819	1.28307	0.968245	0.987946	0.351012
FBgn0035293	9.43159	8.69395	9.81198	1.35866	0.914959	2.16351	10.5372	9.40304	10.8622	4.21446	3.90072	4.43309	6.0791	5.13693	6.65269	3.4187	2.53614	3.62987	2.62233
FBgn0035290	4.78754	3.84781	3.2448	0.230865	0.192732	0.194534	0.291055	0.0636634	0.576759	0.808874	0.252774	0.269325	0.242637	0.2287	0.536519	0.264397	0.074443	0.226848	1.52319
FBgn0053468	4.77898	6.2888	4.04687	3.273	2.61312	2.22195	3.89811	4.82142	2.38215	1.57853	1.99336	1.5029	4.48186	4.90784	3.5934	2.49644	3.14607	2.286	0.131717
FBgn0053469	2.59517	3.6966	2.05587	3.21127	2.88739	2.29466	1.14213	1.3969	0.374785	1.40315	1.72864	1.63318	2.45287	2.80876	1.91381	1.23273	1.2255	1.02116	0.0659886
FBgn0035294	3.26675	3.36948	3.30221	2.65837	2.55685	2.64482	3.05143	3.13589	3.0989	3.20152	3.39517	3.17918	3.12783	3.24076	3.2447	3.08551	3.39572	3.29756	4.02735
FBgn0263087	0.221863	0.42298	0	3.17289	3.04383	3.77607	0.142603	0.328445	0.593512	0.175193	1.04784	1.04709	0.510083	0.75177	0.309206	0.44663	0.12162	0	0.271215
FBgn0263083	3.56791	3.96678	2.98786	10.4185	10.0611	9.75358	3.21375	3.98842	3.13463	4.6179	4.58875	4.40635	4.44425	4.36304	4.17552	3.9211	3.7838	3.95995	2.48298
FBgn0035204	4.35051	4.74896	4.62347	5.12368	4.9644	5.0212	3.49144	3.66176	3.63997	3.0819	3.32614	2.97621	4.53654	4.95204	4.36408	3.03171	3.37385	3.23846	4.87503
FBgn0052594	3.54025	3.0466	3.79365	0	0.429052	0.534432	4.29213	3.34766	4.15378	3.95603	3.33785	4.01178	4.82061	4.5923	5.06611	2.98846	2.28267	2.81492	1.72561
FBgn0052590	2.26299	2.19254	2.13441	1.30278	1.47869	1.8185	2.12155	2.1292	2.02925	1.74932	1.90784	1.69146	2.3164	2.12988	1.92596	1.86044	2.11412	1.62371	1.2882
FBgn0035206	4.88988	5.05379	4.76107	6.16438	6.37034	6.08119	5.13171	5.32395	5.09597	5.98821	6.04065	5.5522	4.98027	5.25419	5.02757	5.63505	5.83086	5.76192	5.55139
FBgn0039417	2.80761	4.12892	2.85907	4.23645	4.11408	3.7048	2.56617	3.65433	2.73894	2.85959	3.16674	2.88419	2.8185	3.2654	2.63426	3.1579	3.11741	3.07325	4.42357
FBgn0261020	4.0375	4.33364	3.94982	3.93147	4.29919	3.9575	4.32183	4.70219	4.25406	6.22459	6.49511	6.12842	4.40688	4.91766	4.54517	6.42131	6.52779	6.3001	3.87735
FBgn0039943	4.04852	4.07214	4.23377	3.01084	3.4232	3.3058	4.12217	4.08388	3.96107	3.79721	3.76442	3.52992	4.18234	4.21301	4.05968	3.99392	4.1199	3.82717	4.56411
FBgn0032222	5.80474	5.79094	5.70734	6.28305	5.88784	5.98344	5.23146	5.36834	5.30186	3.92204	4.19489	3.92783	4.82514	4.76768	4.79854	4.18182	4.33975	4.58751	5.88143
FBgn0030341	5.2636	5.4241	5.19102	4.52332	5.8164	5.18356	5.49372	5.73541	5.27898	8.17407	8.03881	7.67855	5.72711	6.33429	5.89368	7.1698	7.72171	7.34817	5.19535
FBgn0036035	2.02645	2.72581	2.03263	1.57692	2.59449	1.26207	3.07418	3.82461	3.10652	2.65599	2.62962	2.66676	2.9716	3.18142	2.7481	2.67834	2.51081	2.0491	2.72245
FBgn0038404	1.34162	1.30997	1.18435	1.36647	1.72487	2.03875	2.34506	2.36004	1.84851	9.73962	9.70889	9.6429	1.91151	1.96916	2.09717	3.75122	3.21239	5.40488	1.19574
FBgn0038401	1.60813	2.28023	1.54604	1.20056	1.65865	1.91301	1.33993	1.89406	1.80984	2.08537	1.76097	1.65137	1.84159	1.94901	1.56796	2.01932	2.19732	2.04491	4.12048
FBgn0039945	0.916901	2.47159	2.80121	0	0	0	3.01009	1.72287	2.65015	3.26337	0	2.52049	2.62989	3.19925	2.03476	3.51298	3.28596	1.64393	0.280343
FBgn0032224	5.57142	5.07339	5.58824	6.54365	5.95743	6.72194	5.98109	5.95335	5.66568	4.65288	4.66352	4.69962	5.09378	4.88682	5.13978	4.92002	4.84623	4.95326	3.76922
FBgn0029502	5.21325	5.1703	5.3472	3.66179	3.38937	3.61596	5.06361	4.61713	4.97004	3.823	3.96611	3.84849	4.60606	4.59435	4.47986	4.12726	3.96614	4.08799	4.44719
FBgn0266694	4.15335	5.44669	3.4311	5.07743	5.42628	4.83799	4.39239	5.34033	3.49461	5.76127	5.88954	5.00117	3.93927	4.2702	3.9826	4.3117	5.1878	5.22032	5.91976
FBgn0266696	6.86233	6.3025	7.12271	3.4733	3.61207	3.78827	7.34982	6.29742	7.20224	6.81771	6.33891	6.76317	7.23621	7.05519	7.40911	7.05931	6.73942	6.99941	5.00812
FBgn0031972	3.42128	3.43087	3.37881	4.0647	3.62177	4.21522	3.73156	3.62568	3.73472	3.11729	3.36057	3.05924	3.37773	3.40252	3.36897	3.4018	3.71999	3.57815	3.48745
FBgn0031970	0	0.101651	0.0519402	3.1445	2.61309	2.23862	0.209279	0.0918031	0.0424525	0.735545	0.342068	0.22374	0.352038	0.359698	0.0896427	0.813093	0.288263	0.361836	0.806904
FBgn0031977	5.99319	6.70782	5.58541	5.42008	5.28798	5.12978	5.19636	5.84	4.79713	4.73634	5.10287	4.54572	5.67328	6.21796	5.31923	5.01921	5.20329	4.52242	4.12312
FBgn0031974	3.48398	4.04445	3.61292	3.84673	3.6487	4.19035	3.34817	4.17732	3.01682	2.49556	2.81259	2.29432	3.55822	3.80042	3.64552	3.88742	4.9882	3.4954	1.67764
FBgn0060296	4.25983	4.91556	4.61663	0.300282	0.63639	0.507927	6.0426	5.60582	6.12891	3.93314	3.93908	3.79116	5.0959	5.49693	5.12486	3.56165	3.51678	3.25527	2.09983
FBgn0034184	4.10424	4.50481	4.08871	4.33021	4.10157	4.24628	4.66268	4.33903	4.30456	4.06058	3.97311	4.05464	4.43531	4.70124	4.41413	4.34695	4.42212	4.18128	4.85647
FBgn0034186	1.54323	1.6078	1.48579	1.44946	1.80417	1.4926	1.50175	1.62579	1.71148	2.07066	2.16328	1.96654	1.76075	1.63084	1.55043	1.89307	2.18508	1.97986	3.94362
FBgn0034180	4.27502	3.76759	4.52614	3.00882	3.15181	2.12554	4.70254	3.55664	4.4432	4.30464	3.55003	4.02262	4.17043	3.98911	4.36058	3.98681	3.45285	3.32559	2.60285
FBgn0034181	5.87213	5.0921	6.08941	4.27854	5.39384	5.09628	6.36405	5.71362	6.21659	6.92084	6.64659	6.81808	5.87604	5.44804	5.98427	6.49565	6.65308	6.71009	6.57593
FBgn0034182	3.10615	3.32523	2.96924	2.45425	1.85305	2.49771	2.55088	2.45593	2.3464	2.31789	2.56914	2.22738	3.36425	3.49507	2.94551	2.30971	2.42375	2.3651	1.39125
FBgn0038742	4.40555	4.61252	4.39167	7.604	7.28187	7.58496	4.2639	4.50461	4.43336	4.1505	4.56013	4.46294	4.27924	4.37353	4.46912	3.91123	4.22553	4.3838	5.99726
FBgn0038740	1.61467	1.71058	1.56117	0	0.180091	0.615723	1.19374	1.63969	1.5711	1.98414	0.773549	0.942609	1.92795	1.40643	1.16529	1.70312	1.54041	1.8932	3.89512
FBgn0038741	1.27375	1.0977	1.15961	0.175828	0.696812	0.343799	1.58779	1.39766	1.52625	1.68738	1.68519	1.75984	1.54895	1.44884	1.5682	1.73505	1.75931	1.60742	2.38288
FBgn0038746	2.96586	4.44907	2.65754	3.28953	4.12896	3.98333	3.12906	4.69428	3.25757	3.27889	3.49343	3.28489	3.18768	3.80647	2.85708	3.74024	3.70381	3.33974	5.4484
FBgn0038747	4.97031	5.42192	4.93369	3.89739	3.65084	4.11802	4.89875	5.02744	4.79827	6.57063	6.30269	6.51288	5.4835	5.60948	5.54222	5.40161	5.79254	5.78028	5.61883
FBgn0038744	3.97367	4.20597	3.99782	0.175828	1.80444	1.19899	4.12424	3.63256	4.13706	2.58165	2.44237	2.36231	4.14114	3.81967	4.10298	2.34357	2.31219	1.80744	2.25079
FBgn0266101	3.48972	2.69321	3.91528	1.33895	1.48863	1.03007	4.18096	2.9957	3.84941	2.60262	1.60748	2.17231	3.61053	2.99796	3.95828	1.9857	1.45751	1.52652	4.1069
FBgn0030519	7.41787	7.31196	6.87645	8.84153	8.11235	8.58963	6.5925	6.14022	6.21826	6.53302	6.53524	6.36029	6.40806	6.09786	6.28566	6.18088	6.20142	6.00021	5.97803
FBgn0052333	1.98016	2.0219	2.46926	0	0	0	1.68077	1.08436	1.41108	0.210341	0.145534	0.147404	2.93118	2.6353	2.76202	0.177705	0.464483	0.149269	0.168956
FBgn0030514	4.20223	4.15112	4.37007	3.2224	3.26538	3.2941	4.11752	3.95238	4.34231	4.59444	4.3243	4.41193	4.30256	4.4759	4.45496	4.52137	4.73032	4.72126	5.86932
FBgn0030512	3.40532	3.18886	3.44509	4.8942	4.85544	5.00508	3.33513	3.25769	3.48162	3.18954	3.25533	3.63381	3.26566	3.2643	3.40322	3.28838	3.3109	3.39816	5.80862
FBgn0030511	4.05909	4.78835	3.74691	6.53747	6.59264	6.11659	3.22157	3.74637	3.00496	3.91257	4.31763	3.81313	3.47171	3.66645	3.30918	4.11475	4.19134	4.25557	2.78951
FBgn0030510	4.7798	4.65078	4.5332	6.28793	6.16677	6.14187	3.89678	4.12101	3.79612	3.25345	3.65325	3.3594	3.47741	3.49197	3.55729	2.74592	2.58875	2.85358	4.9767
FBgn0036964	3.47513	3.36627	3.2303	4.63784	4.27194	4.35524	3.3493	3.49299	2.8905	3.64953	3.50969	3.48046	3.48923	3.26656	3.13458	3.25033	3.5678	3.21206	2.80498
FBgn0036967	5.48162	4.35284	4.51619	2.41914	2.86662	2.03944	4.60348	4.13702	4.16684	4.33462	3.61685	3.90734	4.43182	4.07114	4.25449	4.04949	3.7106	3.40017	4.14829
FBgn0000964	0.889583	0.613446	0.716547	3.57736	4.15739	3.59415	1.7136	1.86807	1.28882	2.3349	2.07785	2.40907	2.05381	1.79562	1.57292	1.61469	1.31567	1.41392	2.62997
FBgn0033431	3.55667	3.26193	3.43834	6.04899	5.40987	5.80807	4.16442	3.80886	4.14893	5.41794	5.73182	5.58831	4.49882	4.18626	4.79052	5.11061	4.83201	5.48754	3.16667
FBgn0031609	2.67746	2.71144	2.53128	1.9234	2.23619	2.63362	2.6355	2.78523	2.57403	2.51282	2.68299	2.62562	2.76872	2.71103	2.50775	2.54691	2.84271	2.61394	3.52103
FBgn0034988	3.00276	3.50033	3.04952	2.26161	2.88309	2.93848	2.8632	2.8596	2.87489	2.9058	3.15462	2.88737	2.70484	2.94673	2.66906	3.06043	2.91252	3.21225	2.98598
FBgn0034989	4.24002	4.10042	4.65899	3.12277	4.23635	3.84172	4.52829	3.83758	4.65045	4.76077	4.50657	4.60426	4.28863	4.36651	4.305	4.94604	4.97005	4.83135	5.26304
FBgn0010228	8.03949	7.40019	7.72486	8.41602	7.94399	8.49387	7.47736	7.29371	6.96157	7.67361	8.06558	7.48731	7.47607	7.13323	7.39123	7.50111	7.77005	7.19389	3.88842
FBgn0010226	2.96122	3.03135	3.36071	5.21483	4.96593	6.41699	3.33555	3.8495	3.92127	4.18564	4.54431	4.97065	4.4847	4.29951	4.56584	5.60778	5.87237	6.31794	5.67555
FBgn0010225	8.29838	8.03987	8.24178	11.028	10.8341	11.1594	8.39044	8.03706	8.21899	7.70477	7.87262	7.8913	8.17613	8.14029	8.29823	7.82764	7.68443	7.96417	6.6997
FBgn0040104	0.446642	0.527401	0.253587	5.2365	4.17397	3.46301	0.497156	0.734053	0.226661	0.490588	0.420875	0.446411	1.27023	1.0593	0.720522	0.932566	0.481907	0.318691	1.00034
FBgn0034232	3.2007	4.42705	2.77681	4.8511	4.7809	4.7398	2.74002	3.89882	2.56995	3.12129	3.32233	2.79516	3.16181	3.45983	2.59425	3.24314	3.2742	3.11841	4.76574
FBgn0010222	4.40764	5.65067	3.99388	6.13765	6.81061	6.75501	4.08386	5.00992	3.7486	3.33447	4.06949	3.68388	4.01866	5.07591	4.11017	3.67955	4.07209	3.70823	4.13854
FBgn0034982	3.67849	3.98878	3.90877	3.6206	3.95559	4.47187	3.4398	3.75562	3.76007	3.80983	3.90021	3.76342	3.7482	3.83889	3.72842	3.97208	4.11986	4.12233	6.16043
FBgn0037899	7.52125	7.7747	7.42603	9.77468	9.61644	9.49301	6.89847	7.37174	7.0389	6.85365	7.37458	7.15218	6.515	6.34527	6.43946	7.01652	6.31582	6.83803	7.67289
FBgn0265254	0.685861	0.582868	0.406353	2.97737	2.43977	2.52762	0.765074	0.494705	0.452625	0.600161	0.659833	0.430657	0.47053	0.333096	0.305051	0.364709	0.37437	0.344831	0.576281
FBgn0037911	2.29506	2.18618	2.10292	0.539674	1.21057	1.01917	1.89667	1.66475	1.98516	2.02885	2.19935	2.19323	2.16606	2.06398	2.24066	2.27183	2.44942	2.27206	3.1101
FBgn0085771	3.65878	3.39323	3.672	5.78729	5.18548	4.79344	4.45429	3.89396	3.49312	4.06861	3.9703	3.75794	4.18587	3.73511	3.32971	3.79897	3.50382	3.43426	2.35511
FBgn0037756	5.61382	4.9757	5.51107	4.99068	5.25837	4.47547	5.62046	5.62395	5.23833	5.133	4.86119	4.8303	5.82352	5.57148	5.74686	4.69545	4.37635	3.96813	3.73867
FBgn0037757	3.68183	3.64533	3.77548	1.58028	2.13391	1.90294	3.59759	3.18538	3.6759	4.38572	4.1739	4.26804	3.77662	4.1654	4.08163	4.45513	4.79642	4.74495	5.18995
FBgn0033661	0.804641	1.82045	0.881762	0.859685	1.32333	1.0002	2.65446	1.99363	2.31823	2.97256	2.0816	2.54747	1.54342	2.42808	1.71262	2.89637	1.51933	1.77107	2.02249
FBgn0051739	3.68563	3.25687	3.98719	1.9392	3.43157	2.17443	4.55798	4.00184	4.62653	3.84312	3.65304	4.06867	3.87926	3.83796	4.20714	3.83951	3.42742	3.36943	3.96611
FBgn0051224	3.6667	3.26398	3.80964	2.29805	2.46811	1.97353	4.60537	3.46627	4.33867	4.316	3.66284	4.04254	4.05409	4.11115	4.31217	4.10865	3.69177	3.54345	4.35276
FBgn0040751	3.66065	3.91655	3.1809	4.55505	4.17068	4.12366	2.75287	2.95793	2.36729	2.14978	2.36492	1.87046	2.8274	2.81319	2.53815	2.282	2.50838	2.08649	2.85858
FBgn0043900	3.38811	3.15674	3.60659	1.78114	2.87462	2.64939	3.5937	3.08302	3.82566	3.64068	3.1084	3.54216	3.47851	3.28844	3.32975	3.64507	3.76746	3.822	6.11696
FBgn0051223	2.50908	2.97441	2.33336	3.02448	2.92966	2.9871	2.50151	2.82647	2.35843	2.42385	2.56486	2.41028	2.37446	2.66342	2.31823	2.82779	2.88866	2.5036	3.15773
FBgn0037180	1.55641	1.55973	1.02628	3.29293	2.37893	2.24009	2.27704	2.24273	1.10895	9.55672	8.69656	8.53357	2.20427	1.83987	1.55219	1.83268	1.24824	1.28966	0.0259559
FBgn0039868	2.66094	4.27254	2.53327	3.19457	3.86771	4.31806	2.75894	4.09887	2.83311	3.20994	3.41297	3.11275	3.19387	3.87188	2.76821	3.70925	3.45103	3.392	4.42327
FBgn0026575	3.12978	3.28927	3.22136	2.75356	2.68123	2.33768	4.19989	3.30992	3.94873	4.50338	3.28783	3.92647	3.35353	3.61009	3.43808	3.78936	3.56715	3.52343	5.09872
FBgn0037185	1.41219	1.62159	1.65541	0.444664	0.844578	0.938212	1.20355	1.20568	1.64377	2.86974	2.81421	2.7568	1.87978	1.67076	1.80793	2.29092	2.79259	2.17626	3.14591
FBgn0051229	4.77546	5.19011	4.34096	6.5262	6.05433	6.04129	4.19094	4.51848	3.91832	3.62467	3.85315	3.45326	4.23442	4.28571	3.89909	3.77579	3.85049	3.63389	4.44901
FBgn0026570	1.93409	2.36876	1.8964	1.58028	2.35568	1.80048	2.25618	2.53534	2.13454	2.76168	2.51178	2.81158	2.08191	2.39895	2.28708	1.60773	1.73809	1.6475	1.49692
FBgn0037186	4.35221	3.52959	4.23267	6.05527	5.35543	6.06735	2.65646	2.68153	2.70209	4.72567	4.86267	4.32259	3.05797	3.08274	3.26547	6.90508	6.3474	7.21383	3.72999
FBgn0260855	4.90613	5.21362	4.89564	4.47504	6.15075	4.93432	5.18173	5.51083	5.0584	7.55996	7.08088	7.06193	5.3169	5.97037	5.55375	6.8068	7.50737	7.08166	4.91899
FBgn0260857	3.75976	4.17045	3.40082	4.81112	5.0028	4.52599	3.76659	4.32274	3.57195	5.74341	5.72729	5.26354	4.22697	4.58757	4.30403	5.0534	5.50954	5.22883	3.55561
FBgn0260856	2.84146	3.724	2.61248	3.53501	4.17704	3.441	2.62788	3.46718	2.42329	4.56033	4.81223	4.03389	3.0916	3.53803	3.04608	4.13694	4.55858	4.18421	3.03644
FBgn0260859	5.11037	5.12995	5.05591	5.37229	4.79299	5.74565	5.08061	5.15277	4.8007	5.04747	5.01138	4.80774	4.73085	4.68732	4.61371	5.0187	5.1899	5.07457	4.46392
FBgn0260858	4.15395	4.20093	4.08047	3.19854	3.92592	3.50875	4.49265	4.33317	4.41609	5.32285	4.92366	4.89361	4.49376	4.59187	4.48949	4.73634	5.02614	4.82198	4.52814
FBgn0039431	2.25894	1.56649	1.83919	0	0	0.21039	3.10132	1.93861	2.41231	4.45488	2.74132	3.24388	1.89784	1.68626	2.07028	0.966543	0.366856	0.472063	0.685173
FBgn0039430	4.36876	4.20862	4.53871	2.84609	2.9962	3.34704	4.46841	3.81179	4.48289	4.69039	4.45486	4.72974	4.38677	4.27924	4.46581	5.38572	5.41433	5.54795	2.9035
FBgn0032117	2.27304	2.06902	2.49836	0.332536	0.95853	1.14134	2.25399	2.05949	2.18026	2.44943	2.72423	2.78213	2.68747	2.77389	2.70413	2.29641	2.19608	2.16616	1.60226
FBgn0032116	2.28206	1.89757	2.81105	0	0	0	1.49016	0.405048	2.04505	0.318718	0.804461	0.272817	0.505048	0.47773	0.551295	0.0682529	0.153238	0.0586423	1.03058
FBgn0026879	6.77016	7.33345	5.997	8.13125	7.78162	7.49995	6.1883	6.59806	5.48752	5.77923	6.09587	5.42865	6.13334	6.19138	5.74795	6.02607	6.03741	5.84293	4.80267
FBgn0036258	6.45953	6.45907	6.72759	7.1196	7.48795	6.89476	6.7348	6.49381	6.78877	7.94364	7.86098	8.14184	6.81079	6.48478	6.97856	7.04226	6.69442	7.06574	6.80697
FBgn0037760	3.74862	3.30958	4.00562	2.12746	2.7437	2.03412	4.56283	3.3678	4.26138	3.94688	3.36924	3.82645	3.90325	3.87704	4.03867	3.96097	3.5553	3.61513	5.39614
FBgn0036259	0.820767	0.634135	1.08741	0	0	0	1.57868	1.51548	1.85378	0.193268	0.0805306	0.389303	0.399718	0.38791	0.704166	0.260451	0.166852	0.115038	0.0542243
FBgn0036587	2.35732	1.20389	2.66037	0.247878	0.15447	0.627952	5.2353	4.82371	5.15968	2.62431	2.19402	2.93188	7.52462	6.78835	7.77093	1.76544	0.876079	1.39223	0.733039
FBgn0036581	5.38586	5.32697	5.21684	5.82007	4.82332	5.30068	5.21819	5.38002	4.76089	4.65629	4.62189	4.37653	5.17849	5.01035	4.89736	4.54119	4.70085	4.36048	2.21073
FBgn0036589	4.58043	4.71596	4.55348	1.22788	2.30825	1.6853	2.74339	3.0792	2.71531	3.0542	3.25963	2.57924	3.18508	3.78315	3.36431	1.8788	1.98724	1.54158	0.921081
FBgn0032805	3.51293	6.56965	2.93649	5.44232	5.27562	4.10275	3.46574	5.71173	2.65238	2.52671	3.68392	2.8213	3.8715	4.8862	4.08692	3.74107	4.13436	4.08833	2.6878
FBgn0032801	4.04888	4.78276	3.83837	7.0794	6.72612	6.68415	4.57704	5.0254	4.32166	5.22598	5.43859	4.90562	4.17978	4.64257	4.23291	4.73488	5.2354	4.86984	3.63708
FBgn0032800	2.82658	2.87559	3.09229	2.44322	2.6087	2.59054	3.81287	3.89288	4.12404	2.97897	3.25282	2.99737	2.40774	2.80681	2.48626	2.65854	3.17674	2.88607	1.60545
FBgn0263316	3.73342	4.03566	4.06116	2.99211	3.91909	2.69969	3.62772	3.52081	3.5377	3.33686	3.39798	3.28427	4.45064	4.63196	4.75908	3.84842	3.57078	3.31094	1.46465
FBgn0020509	1.83268	3.05357	1.9113	0.0811299	0.135389	0	1.31123	2.87351	1.51902	0.0311254	0.260003	0.0981288	0.440095	1.06839	0.519369	0.0667145	0.0549611	0	0.0110091
FBgn0020503	9.22159	8.4974	9.24127	5.87267	5.36499	5.60692	8.96392	8.40523	8.66902	9.6033	9.17012	9.21657	7.7223	7.39825	7.68571	8.92943	8.65542	8.87392	3.562
FBgn0030466	1.7603	1.87863	1.83457	0.575903	1.26904	1.14511	2.44883	2.03552	2.425	2.55092	2.5505	2.51616	2.23584	2.41259	2.23396	2.8211	2.84975	2.65613	3.88157
FBgn0030465	2.82744	3.19055	2.95071	3.03271	3.35987	3.02152	3.42461	3.47525	3.53297	4.04857	4.35064	3.83864	3.95355	3.89383	4.11283	3.88433	4.21749	4.01494	5.41909
FBgn0032873	2.48081	3.25214	2.77269	1.69189	2.66559	2.22496	2.77015	3.25731	3.17056	2.73815	2.88207	2.82799	2.733	2.88321	2.71596	3.18223	3.07686	3.16574	3.57337
FBgn0024555	4.56615	4.00475	4.94928	2.96962	4.41853	3.26356	5.64558	4.37663	5.36758	5.66302	5.02085	5.22996	4.85451	4.68186	5.04852	5.06917	4.60094	4.36948	4.99217
FBgn0032453	7.98802	7.97822	7.32081	9.86143	9.33997	9.47356	7.34129	7.34176	6.87829	6.50408	7.0004	6.60203	7.08018	6.82374	6.74306	6.89925	7.15443	6.91015	8.22474
FBgn0035461	2.36592	2.09221	2.6742	0.539674	1.42325	1.40259	2.77837	2.54125	2.74544	2.03928	2.08407	2.34845	2.54307	2.56574	2.73196	2.53019	2.30736	2.28289	1.71097
FBgn0035462	1.64546	1.46816	1.81966	0.831748	1.33287	0.930015	1.61904	1.71685	1.8726	2.21353	2.25454	2.47092	1.99471	2.07133	2.06205	2.44859	2.33903	2.52699	2.59311
FBgn0030276	5.88615	5.07103	6.02545	3.21634	4.48531	3.55001	6.62207	5.27722	6.16406	6.0436	5.21566	5.81706	5.62058	5.32268	5.48198	5.91987	5.47376	5.63948	5.25948
FBgn0035464	2.60615	2.69149	2.40648	1.02298	1.93809	1.55755	2.06073	2.14181	2.4279	2.17553	1.97924	2.32661	2.4539	2.5608	2.24705	3.22624	2.59433	3.03921	3.49568
FBgn0037891	7.51241	7.26543	7.56623	6.51554	6.73006	6.76109	7.01827	6.59902	7.00049	5.66319	5.93458	5.70027	6.38296	6.59805	6.62259	5.75182	5.80876	5.79575	5.72167
FBgn0020647	4.08947	4.24713	4.32458	3.24654	3.13192	3.53656	3.49522	3.18337	3.38251	4.7866	4.3643	4.56251	3.82439	3.53813	3.67976	5.72995	5.13376	6.35436	5.63481
FBgn0033602	1.06428	1.06866	1.66899	0	0	0.0504182	0.452333	0.269284	0.401676	0.345436	0.450192	0.378351	0.112282	0.107518	0.276971	2.37663	1.82641	1.7401	0.538209
FBgn0266848	3.51778	2.90264	3.48884	2.76837	2.93255	1.93763	4.68023	3.25463	4.11986	4.12632	3.28018	3.89848	3.71605	3.43354	3.81486	3.78604	3.1369	2.94206	4.00882
FBgn0033605	3.48503	3.28146	3.18695	4.18577	3.70539	3.88472	3.42968	3.28191	2.93305	3.20036	3.39111	3.06577	3.42586	3.27327	3.16068	3.11516	3.41217	2.99765	1.79078
FBgn0028416	0.0559401	0.0256986	0	0	0.0322455	0.0258004	3.52276	0.0880441	1.21921	0.260601	0.0177262	0.0480994	0.0318507	0.0145966	0.030504	0.186233	0.0522539	0.0127619	0
FBgn0033608	6.62649	6.58904	6.2636	7.53208	7.09949	7.44205	5.97703	6.04251	5.69701	5.0336	5.36285	5.02628	5.69964	5.69889	5.55163	5.15044	5.33062	5.20134	5.67553
FBgn0028411	4.14929	4.9033	3.59605	4.74255	4.28199	4.43025	3.47914	3.89969	3.28105	3.47034	3.69476	3.10172	3.98682	3.7645	3.26854	3.60045	3.97102	3.48917	5.09489
FBgn0261811	4.3153	4.67748	4.11675	3.15391	3.53597	3.37607	4.50447	3.93355	4.19212	4.34717	3.81919	4.27579	4.46402	4.84418	4.6183	3.48857	3.59102	3.28135	6.88138
FBgn0031975	6.52146	7.04924	6.70262	1.58468	1.95254	1.34086	6.88122	6.90078	6.96716	2.63786	3.17374	2.49175	5.67123	5.37512	4.96719	3.08438	2.98644	2.9287	3.29999
FBgn0024889	4.97586	5.2593	5.06427	4.11202	5.43628	4.8037	5.00806	4.97755	5.11031	4.89389	4.91665	4.82447	4.7398	4.89034	4.72893	5.23384	5.10211	5.18126	4.98
FBgn0039860	1.46597	1.75412	1.73403	0.986389	1.59436	1.44572	1.66997	1.67177	1.63206	1.5923	1.97573	1.73674	1.96311	1.79147	1.764	1.93841	1.99282	1.85364	3.05232
FBgn0024887	3.02828	3.12178	3.03559	2.29191	2.69907	2.64481	3.27506	3.44016	3.30846	3.22901	3.31517	3.22393	3.0744	3.03324	3.08557	3.10488	3.13176	3.1273	3.24719
FBgn0024330	2.26987	2.1967	2.60665	0.894191	1.74416	1.01403	3.12503	2.98133	3.32525	2.87169	2.83176	2.94791	2.80847	2.62127	2.77916	2.85615	2.89176	3.01188	3.16966
FBgn0035601	7.61698	7.61386	7.21015	8.10788	7.72158	8.06855	6.99632	7.59881	6.45653	6.70257	6.6607	6.671	6.55519	6.86297	6.97432	6.66904	6.79766	6.73163	7.09757
FBgn0263768	2.58746	2.10893	2.6814	1.12605	1.72892	0.965062	3.16397	3.16713	2.9959	2.26671	2.35894	2.32483	2.90194	2.86353	3.23904	2.34181	2.1999	2.0303	1.93899
FBgn0039861	1.82057	1.65349	1.99237	1.11682	1.94558	1.47029	2.13136	1.96546	2.34937	2.40431	2.23785	2.41651	1.89572	1.97255	1.87649	2.19886	2.27802	2.16308	3.83767
FBgn0033663	8.04846	8.1339	8.17333	7.48142	8.08163	7.38623	7.55164	7.75788	7.57679	10.1655	10.3553	10.1311	10.7653	10.7935	11.2339	9.9816	10.198	10.126	8.4084
FBgn0267242	1.13322	0.983942	1.69511	0.575903	0.359751	0.774778	2.82673	0.93575	2.52634	0.533209	0.974726	0.615281	1.65432	1.72295	1.92384	1.54474	1.44593	1.48998	0.0753559
FBgn0034471	5.17639	6.15136	0.170266	0.720772	1.03024	0	0.219711	1.17955	0	1.28354	1.47883	0.120075	0.935181	1.47938	0	0.794216	0.443749	0	3.68443
FBgn0003721	12.0224	11.7145	11.0822	6.28251	5.99412	5.57146	10.8223	10.7384	10.3106	8.1366	7.80175	7.70013	10.6429	10.086	9.47701	7.81007	7.31176	7.05383	6.59699
FBgn0085360	2.2273	2.18259	2.75343	5.52742	6.39066	7.04779	4.19517	4.53785	4.34545	3.5585	3.78272	4.14989	5.72045	5.64321	5.966	2.68028	2.62757	3.3407	2.05559
FBgn0260940	3.90342	3.81708	3.77742	3.77172	3.57328	3.31252	3.6721	3.6382	3.52317	3.86492	3.94883	3.66657	3.84881	3.64368	3.7004	3.92261	3.93557	3.82021	3.0809
FBgn0052100	2.01703	1.28463	2.084	0.772371	1.00036	0.434631	2.42153	1.90515	2.51027	1.75173	1.37807	1.80449	1.7929	1.79683	2.06236	1.815	1.68955	1.54116	2.40531
FBgn0052103	4.86628	5.22966	4.89224	4.95791	5.76746	5.31742	5.53886	5.9164	5.57779	5.15474	5.11424	5.35139	5.29617	5.48368	5.47401	4.75108	4.90636	4.88546	4.8146
FBgn0052104	4.40387	5.04205	3.06577	1.01306	1.41285	0.828734	1.81974	2.03705	2.13715	2.32635	2.57775	2.36684	2.14164	2.41036	2.21836	5.34211	5.7334	4.97081	3.86194
FBgn0025681	4.95409	4.8853	5.12451	3.22811	4.44505	4.00761	4.96031	4.45809	4.94676	4.26677	4.20248	4.28001	4.84278	4.86146	4.88939	4.4625	4.55914	4.62695	5.52276
FBgn0025680	6.68154	6.13821	6.4205	8.45434	7.93325	8.37057	7.07473	6.73892	7.2493	7.61349	6.96574	6.91011	5.98296	5.60543	5.99098	7.62292	7.49706	7.47328	4.64875
FBgn0025683	7.04246	6.5631	6.95508	7.43916	8.67697	8.22902	6.88643	6.63465	7.0475	7.78352	7.79709	7.87478	7.109	6.82728	7.07026	7.7644	7.377	7.73972	5.77294
FBgn0025682	3.53478	3.91441	3.32474	5.82233	5.96225	5.43173	4.0313	4.19652	3.72164	3.71954	4.00375	3.5327	5.76265	5.83091	5.69268	3.51558	4.02111	3.40955	4.76243
FBgn0025684	3.09721	3.61995	3.10776	3.28303	4.26561	3.72693	3.17022	3.49291	3.39402	5.09181	5.10819	4.52587	3.64005	4.04707	3.71377	4.89418	5.19138	5.06998	5.03238
FBgn0034346	2.97694	3.16842	3.10028	1.07305	2.51248	1.84034	3.33564	2.9325	3.47503	2.74691	3.12863	2.90865	2.99372	3.42976	2.89528	3.01253	3.61433	3.11596	4.46182
FBgn0039863	3.33731	3.07348	3.66456	2.42102	2.80373	1.58324	4.46256	3.18516	4.40808	5.13765	4.48969	5.0288	3.62157	3.8063	4.04502	4.38743	4.01336	3.76586	2.7399
FBgn0040658	4.01986	4.75181	3.71244	3.53793	3.4959	3.87099	3.91419	4.0159	3.47667	4.23734	4.22049	4.04109	3.48423	4.02396	3.65651	4.25092	4.8118	4.35922	1.53223
FBgn0014022	1.87106	2.10067	1.95166	1.50931	1.60103	0.895398	2.56212	2.71127	2.44903	2.40674	2.11213	2.38158	2.33983	2.34532	2.15124	2.12266	1.86787	1.59948	1.84288
FBgn0039864	0	0.124373	0.134215	0	0	0.0760569	0	0.0636634	0.0366513	0	0	0	1.60698	1.50056	2.30151	0	0	0	0.450195
FBgn0026015	3.47677	3.92412	3.58918	3.52119	3.80068	3.899	3.40897	3.42138	3.70458	4.237	4.23979	4.20359	3.61228	3.82926	3.61361	4.36528	4.31387	4.3473	6.36383
FBgn0010173	5.02976	5.47456	5.02505	4.28534	4.20107	4.44342	4.59707	4.59243	4.77174	4.44669	4.68162	4.49781	4.92874	4.77217	4.60905	4.5332	4.64098	4.50297	7.6905
FBgn0260468	2.83915	3.95832	2.52686	3.60113	4.21421	4.55373	2.49443	2.81094	2.63116	2.51786	2.83935	2.41312	2.67512	3.02538	2.36263	2.56874	2.87978	2.68424	4.81001
FBgn0265003	5.14653	5.12699	5.42265	2.00555	3.8365	2.49108	5.62033	5.43121	5.66157	5.83209	5.4826	5.88772	5.45782	5.74231	5.66418	5.5299	5.20755	5.49172	5.09019
FBgn0265002	0.551995	0.662014	0.676787	0	0	0	0.335098	0.251169	0.429575	0.0488372	0.0352373	0.0662913	2.27482	1.80634	2.38398	0.03453	0.0664075	0.054519	0.161665
FBgn0041709	0.435348	0.385945	0.35249	0	0	0	0.634629	0.911495	0.671887	0.311224	0	0.181995	2.34605	2.63324	2.24815	0.177237	0.243483	0	7.36353
FBgn0035205	4.05143	4.15629	4.39809	3.19642	3.70464	3.36679	4.34794	4.0991	4.51988	4.6037	4.4913	4.55545	4.31344	4.38519	4.51215	4.63825	4.65845	4.67774	5.6075
FBgn0003187	0.281318	0.0641047	0.161003	0	0	0	0.295813	0.391857	1.04691	0.578271	0.390078	0.212475	1.23239	0.437843	0.277728	1.98804	1.98804	1.52704	4.35862
FBgn0003189	1.60814	2.9833	1.53592	3.09028	4.05243	4.72627	1.34781	1.92182	1.71364	3.74888	3.89033	4.09851	2.14368	2.95878	2.5255	4.92715	4.07496	4.87706	6.28108
FBgn0037978	2.98399	3.23873	2.94586	5.16062	4.54426	5.0036	2.50516	2.60491	2.4287	2.77985	2.9715	2.52148	2.84792	2.93121	2.78711	3.18889	3.30491	3.25757	4.15441
FBgn0037979	2.99118	2.68868	3.18676	1.34292	2.15259	0.961188	4.15888	3.15359	3.77289	4.18155	3.51374	3.94224	3.25245	3.49091	3.59139	3.5537	3.29372	3.02893	2.32317
FBgn0037973	2.96378	4.04216	2.85924	6.95045	6.2173	7.08451	3.59095	3.32919	3.37923	3.16481	3.71395	3.81015	3.63842	3.47239	4.06585	3.75456	6.13361	4.86993	3.58699
FBgn0037974	2.32478	2.57863	2.45019	7.33798	6.66436	7.36129	3.15811	3.05668	2.91809	2.95784	3.27068	3.43545	3.75124	3.37487	4.2114	3.01845	4.42483	3.86174	2.88207
FBgn0037975	3.36907	3.95066	3.19498	9.29351	8.53213	9.07132	3.43449	3.85897	3.40333	3.88391	4.33305	4.48334	4.26852	4.11463	4.37273	3.79857	5.11677	4.21893	4.0728
FBgn0000578	1.59725	1.96997	1.31935	0	0.387878	0.522865	3.0573	2.36659	2.19019	2.84201	1.90151	2.74734	2.99084	3.32659	3.43904	2.11367	1.65121	1.82063	2.54465
FBgn0000579	6.8063	6.30982	6.71026	7.84972	7.18611	7.95741	6.58286	6.24734	6.57264	6.48122	5.20275	5.45186	5.68976	5.50418	5.81035	5.41322	5.10503	5.58674	6.74701
FBgn0039296	2.41872	3.2422	2.17971	3.42153	5.60648	2.62346	2.37901	3.01057	2.21467	3.96294	4.17407	3.51838	2.6121	3.33631	2.38068	3.42356	4.18145	3.47928	3.82391
FBgn0051901	0.881977	0.969094	0.80254	0	0	0	2.06364	0.867896	1.55632	0.0674448	0.0525383	0	0.0495216	0.223141	0.24797	0.0820493	0.0416897	0.0810249	0.709168
FBgn0000576	3.78972	3.65089	4.14584	0	0	0	0.712062	0.480659	0.882011	0.647641	0.492407	0.429494	0.7358	0.566737	0.958011	0.231625	0.153927	0.153934	0
FBgn0000577	3.02583	2.17161	3.27072	0	0	0	2.08603	1.46788	2.13659	0.369344	0.361714	0.408481	0.597132	0.707748	1.12635	0.118301	0.0734757	0.230507	0.0435412
FBgn0000575	5.51545	5.32958	5.44829	2.4808	2.67359	2.15887	6.82989	5.78086	6.377	4.84461	4.22336	4.52576	5.44207	5.12924	5.57768	5.67913	4.78423	4.44744	2.22022
FBgn0038903	2.1206	3.37855	2.06346	2.24264	2.67238	3.00607	2.16644	3.22461	2.13253	1.58373	1.98298	1.46122	1.93061	2.65523	1.59804	1.87984	1.99562	1.71651	2.25894
FBgn0259732	6.9928	5.49007	6.89794	1.32174	0.80561	0.760295	4.12862	3.67772	4.28965	4.00007	3.251	3.25208	6.11089	6.02161	6.23146	2.72743	1.879	1.86916	1.10798
FBgn0259734	4.65856	4.01815	5.31359	0.776415	0.901141	1.28033	5.44699	4.21018	5.56741	5.67626	4.62813	5.68028	4.85947	4.45389	5.33637	4.34288	3.85517	4.70406	6.29088
FBgn0259735	3.48631	4.35378	3.64785	1.74564	2.5292	2.00222	5.04655	4.46829	3.99264	6.16133	5.10445	5.47288	4.73533	4.97393	5.05326	4.82424	4.91448	3.99333	4.934
FBgn0259736	6.32581	5.99929	6.94439	0	0.0946517	0.413644	7.05744	6.03284	6.45545	4.04989	3.43968	3.84927	6.14935	5.87568	6.18764	3.44079	2.73051	2.52671	1.69951
FBgn0039600	3.85548	3.95941	4.34068	3.10778	3.8498	3.8062	4.64726	4.32119	4.79169	5.28986	5.05585	5.18278	4.17356	4.43207	4.5287	5.48152	5.24862	5.46219	4.48241
FBgn0039601	3.47977	3.7396	3.58389	3.3269	3.56907	3.70448	3.2197	3.35161	3.38247	4.27527	4.35115	4.169	3.62061	3.63854	3.5388	4.10245	4.30607	4.25344	5.18654
FBgn0039602	1.4128	1.09329	1.45591	0.740806	1.07055	0.366257	2.21115	1.46147	1.99672	1.96573	1.27549	1.83521	1.53306	1.5973	1.74165	1.60966	1.19457	1.28189	1.3619
FBgn0039609	0.220469	0.270645	0.433702	3.34875	2.9427	3.63734	0.200785	0.251169	0.457808	0.688962	0.660063	1.04544	0.466331	0.494512	0.573715	0.60634	0.40727	0.664116	0.248971
FBgn0259728	2.30356	2.47298	2.00057	2.69032	2.60557	2.3598	1.91967	1.7998	1.92606	2.08991	2.33453	1.99825	2.13221	1.93535	1.95015	2.22677	2.51636	2.14454	3.09394
FBgn0031452	1.63176	1.30169	1.59989	1.27971	1.17278	1.00787	2.32936	1.73661	2.14552	1.59342	1.37263	1.5325	1.84744	1.85896	1.87062	1.41007	1.22168	1.13612	2.42574
FBgn0030724	5.21361	4.58639	5.62279	5.46897	6.14026	6.55662	5.52293	5.44384	5.71719	5.63292	5.56997	6.0196	5.13008	5.06361	5.56295	5.1669	4.9298	5.35652	3.59778
FBgn0030720	2.50671	4.00129	2.60202	3.05613	4.05315	3.2598	3.21758	4.02401	3.38837	3.82623	3.74853	3.93289	3.04734	3.78178	2.95265	4.03794	3.72908	3.836	4.60596
FBgn0034246	3.05662	2.64943	3.18208	3.5133	4.00457	2.88789	4.7943	4.0327	4.87025	5.03889	4.52328	4.94871	4.08265	4.02117	4.42633	4.60849	3.85662	3.90942	2.94555
FBgn0011327	4.34135	4.35747	4.14885	4.05673	3.6195	3.67951	4.24304	4.30561	4.24175	4.32864	4.43513	4.20708	4.10158	3.94879	3.78098	4.20681	4.27415	4.06461	5.83995
FBgn0050042	2.33633	1.45514	1.80224	0.175828	0.436865	1.57185	0.72762	0.20212	1.10751	1.71966	0.849225	1.73438	1.36902	0.530512	1.22801	1.0835	0.373291	1.39139	5.63772
FBgn0034152	0	2.52318	0.885593	0	3.25514	2.0113	2.75515	2.94646	0	9.63039	9.80609	9.38144	1.12918	1.91045	0	2.64812	0.931903	0	0
FBgn0011638	5.6465	7.26318	5.42862	6.34565	6.9617	6.88033	5.4137	6.56965	5.35222	5.51926	5.89709	5.482	5.32722	6.09997	5.11423	5.94787	6.08327	5.85142	7.91052
FBgn0029903	3.69427	3.16055	3.90323	1.94001	2.35568	1.6731	5.1029	3.85313	4.90183	4.61634	3.77436	4.60408	4.41098	4.53302	4.63455	4.40122	3.82594	4.22708	4.72414
FBgn0029906	2.57989	2.51005	2.71515	3.63603	3.46558	3.76423	2.74147	2.46418	2.88345	4.0804	4.30105	4.11309	3.27725	3.46181	3.53458	3.90705	3.96501	4.08079	3.40588
FBgn0031773	3.15726	3.00384	3.26121	2.29601	3.02087	2.85741	3.12845	2.56633	3.07344	3.02703	2.99592	2.84362	2.95348	2.92248	2.89313	2.80567	2.92106	2.80208	3.45777
FBgn0051038	5.72753	5.46152	6.18494	0.490491	0.785155	1.21813	6.40712	5.5046	6.48126	5.94866	5.47631	6.20063	5.08634	4.8111	5.41763	6.04212	6.262	6.15872	3.06087
FBgn0262962	3.74721	3.51865	3.06279	4.03262	3.12503	2.96868	2.92786	2.70795	2.37155	2.81897	2.479	2.20292	3.14294	2.86951	2.55748	2.47057	2.63247	2.14736	0.883659
FBgn0050342	3.86576	4.01514	3.65592	4.69016	4.33902	4.38614	3.48713	3.64285	3.46225	4.19554	4.188	3.9681	3.62256	3.64269	3.45085	3.76854	3.85735	3.77507	5.22789
FBgn0050343	2.22453	2.4225	1.69302	0.91197	1.3382	1.65151	1.74837	2.23954	1.60717	1.54483	1.70874	1.65596	1.72668	1.94336	1.39562	0.979845	1.51477	1.06995	0.905001
FBgn0050344	6.83279	7.00079	6.80332	5.84361	5.4148	5.24852	6.67333	6.04788	6.57147	7.89332	7.78244	7.48374	6.59033	6.48586	6.66687	6.91145	6.42087	6.94049	4.71282
FBgn0050345	2.30924	2.20317	2.5905	3.20734	2.4519	2.72214	4.18536	3.68409	4.37936	5.9534	5.65749	6.24469	3.30153	3.06027	3.37957	4.55866	4.17907	5.28205	2.14964
FBgn0027504	3.2854	3.09843	3.5555	2.49745	2.67328	2.35523	3.83244	3.20983	3.83511	3.74727	3.35126	3.78719	3.64465	3.55063	3.75412	3.74673	3.55078	3.68956	4.62666
FBgn0027505	3.30821	3.24078	3.40003	4.09354	3.93096	3.85264	3.24078	3.05751	3.2734	4.55142	4.44682	4.28412	3.47759	3.56154	3.57494	4.26833	4.63171	4.50775	4.56443
FBgn0027506	4.43419	3.44057	4.72945	4.86014	5.2689	6.17257	4.86143	3.85342	4.81443	5.14841	4.56757	5.03179	4.66107	4.20869	4.79133	5.05731	4.5712	5.03753	6.3204
FBgn0027507	3.84441	3.72178	3.77387	3.99211	3.86048	3.40922	4.32422	4.10147	4.14081	5.05634	4.42792	5.01581	3.88047	3.75515	3.98511	4.03666	4.0059	3.73685	3.26324
FBgn0027503	2.43607	2.52754	2.85686	1.63928	2.42715	1.73113	3.2074	2.88209	3.24285	3.24194	2.90974	3.19153	2.98656	3.01173	3.03404	3.30702	3.13934	3.03214	3.38374
FBgn0266064	6.24812	5.85073	6.61513	8.37483	7.64525	8.83922	5.99217	5.77296	6.39163	5.98302	5.75955	6.44915	5.62143	5.11614	5.94479	5.81251	5.70026	6.32339	7.59416
FBgn0029822	2.61049	2.40007	2.7433	0.752774	1.59436	1.28145	3.05583	2.48805	3.1734	3.00989	2.68127	2.65307	3.10569	2.66745	2.93319	3.16866	3.03274	3.07923	4.2649
FBgn0027508	3.81266	3.68038	3.97145	3.08674	2.87906	3.22295	3.96522	3.51565	4.03646	4.76192	4.68165	4.70511	3.7434	3.74486	3.80871	4.8431	4.91386	5.054	5.77924
FBgn0260439	7.23512	7.17467	7.31029	6.5169	6.65126	6.6931	7.28442	7.06696	7.25932	7.08985	6.88584	6.96552	7.19114	7.1889	7.15171	7.30984	7.30088	7.39834	7.13091
FBgn0058469	9.96449	10.3061	9.01692	9.20244	8.68621	8.08012	9.12358	9.30443	8.4114	6.92468	7.21717	6.39237	10.2999	9.72257	9.2952	7.59757	7.04484	6.84008	5.13305
FBgn0260386	3.85777	3.32235	4.58057	0	0.42334	0.182224	2.14992	1.54689	2.61809	3.37185	2.95359	3.15167	6.19034	5.84061	6.75615	3.56878	3.56487	3.61179	0.607013
FBgn0037518	2.27177	2.17266	2.56162	1.44209	2.6686	2.4706	2.69196	2.44371	2.5967	2.55546	2.78152	2.72876	2.86424	2.88261	2.76809	2.51113	2.74286	2.41832	1.79467
FBgn0030239	4.62798	4.7744	4.34167	8.48311	7.79745	8.23749	4.25034	4.25161	4.28256	4.45356	4.80217	4.69972	4.33361	4.52495	4.53491	4.51286	4.58454	4.80227	4.94413
FBgn0065032	1.83009	2.51478	1.55495	1.54867	1.44033	1.30289	1.94242	2.45453	1.51201	5.18953	5.27491	4.83866	3.87807	4.01656	3.60471	5.59516	5.71052	5.52467	1.88389
FBgn0037513	6.35347	6.11655	6.27126	7.04901	6.41727	7.27915	7.07977	6.7539	6.98718	4.03932	4.11739	4.24451	6.23523	6.0826	6.37415	4.60244	4.15082	4.67296	3.33406
FBgn0065035	3.06409	3.41819	2.87113	3.24997	2.67868	3.5309	2.92719	3.42535	2.87175	3.44742	3.48612	3.45711	3.25517	3.24985	2.97605	3.94704	3.88234	3.79477	2.703
FBgn0035028	3.74646	3.82138	3.74865	4.16731	3.90245	4.23337	3.71825	3.71241	3.6734	4.52142	4.52585	4.45135	3.80357	3.88853	3.7852	4.60861	4.74015	4.64671	4.91435
FBgn0036179	0.859908	0.964763	0.716333	0	0.286939	0	1.50033	1.57974	1.00116	0.355383	0.0609378	0.0512777	0.819459	0.709694	0.617144	0.228821	0.192781	0.182924	0.11518
FBgn0033457	5.10407	5.35547	4.63397	5.99988	5.43442	5.3776	4.40004	4.91885	4.19395	4.04742	4.12655	3.8328	4.54052	4.61223	4.08089	4.26487	4.39385	4.17935	5.34037
FBgn0036173	5.38139	5.7529	4.9657	6.16073	5.86972	6.01056	4.94247	5.23444	4.56967	3.80802	3.98752	3.59095	4.57546	4.70201	4.36302	3.99021	4.10223	3.795	4.74312
FBgn0033451	3.9923	3.72558	3.5216	7.33219	6.62685	7.28539	3.61848	3.58913	3.39661	3.37294	3.36119	3.45575	4.07092	4.14354	3.939	3.87805	4.19929	4.03592	5.24879
FBgn0030318	4.03456	4.47001	4.21839	2.42347	3.03122	3.32332	4.10099	4.55571	4.12274	5.90075	5.5913	6.00747	4.25241	4.51742	4.49167	6.0151	5.87831	6.7065	4.59823
FBgn0038269	2.29281	2.39926	2.56354	1.58028	2.69344	1.2429	3.1668	3.20907	3.3264	3.71682	3.33312	3.61359	2.91261	3.03432	3.10627	3.58653	3.31995	3.07035	2.89068
FBgn0040735	4.4066	4.6281	3.75452	10.1453	9.32701	9.34895	3.55	4.10968	3.36908	4.45602	4.50637	4.31633	4.63088	4.538	4.37241	3.91173	3.62705	3.84887	2.16307
FBgn0040736	5.94922	6.9278	5.60305	9.58892	10.9894	10.4732	7.26997	8.68822	6.4625	7.85026	8.5741	7.40881	7.39667	8.23748	7.23322	6.8226	7.42386	6.76579	3.64318
FBgn0040732	5.6263	5.42826	6.27055	10.5637	10.8932	11.9955	7.42969	7.67139	7.48888	7.55341	7.7216	8.09271	7.52897	7.51226	7.85169	6.74717	6.63655	7.22172	2.99026
FBgn0040733	5.28539	6.1653	5.12358	12.5321	12.3182	11.9501	5.21761	6.16444	5.27446	6.34052	6.63366	6.27638	6.70762	6.51817	6.50035	5.89079	5.56488	5.83809	5.09369
FBgn0051694	6.03417	6.2285	5.59936	6.76664	6.76426	6.51448	5.86066	5.87779	5.51246	6.59355	6.466	6.54306	5.72734	5.83934	5.46965	6.25919	6.24841	6.49645	6.67268
FBgn0035020	8.86036	8.55216	8.29885	9.70663	9.14832	9.06162	8.10906	8.03946	7.54359	10.1083	9.65617	9.31133	9.07604	9.07695	8.81308	9.84558	9.95369	9.8159	5.47644
FBgn0020767	4.16649	4.26965	4.22258	3.3319	3.27205	3.30331	4.62261	3.9521	4.34683	3.61106	3.28796	3.43572	3.70865	3.91249	3.93249	3.69897	3.57956	3.66378	4.99926
FBgn0035021	2.8912	2.7643	2.8974	1.27971	2.47071	1.98447	2.92332	2.80195	3.09833	2.78766	2.70305	2.86948	2.96199	2.72662	2.96379	2.82882	2.88818	2.76567	3.54324
FBgn0005585	8.07265	8.40881	7.94429	7.77313	9.10242	8.3818	8.37526	8.69684	8.0816	11.8064	11.698	11.4587	9.30324	10.0568	9.84493	10.4804	10.8862	10.5955	8.01675
FBgn0036397	2.39153	2.43432	2.42031	1.94182	2.30495	2.01611	2.28187	2.32383	2.60561	2.09524	2.61483	2.33311	2.39208	2.45486	2.54175	2.46554	2.64497	2.65107	4.43472
FBgn0036396	1.60918	1.81694	1.98354	1.26307	1.94582	1.38386	1.47638	1.39246	1.58944	1.44951	1.35899	1.27426	1.88974	1.67696	1.52854	1.15283	1.35707	1.69552	4.1157
FBgn0036398	3.68264	3.33375	3.25938	3.78029	2.54984	2.3634	5.19462	2.71498	3.73301	4.14467	3.00028	3.48624	3.38792	3.04896	2.97443	3.84543	2.78307	2.88594	2.99217
FBgn0019938	2.87234	4.08624	2.96702	2.75551	4.25425	3.24923	3.25421	3.87849	3.45358	3.81005	3.74891	3.8809	2.98523	3.83756	3.16481	4.17783	3.96272	4.09839	4.2321
FBgn0035025	1.77594	1.53461	1.87607	0.332536	1.27698	0.531917	2.16848	1.97559	2.11983	2.30767	1.9008	2.21277	1.89653	2.03415	2.04638	1.98761	1.73739	1.71914	3.01436
FBgn0035026	2.26855	2.2148	2.53197	1.30151	2.09785	1.82289	2.58786	2.33366	2.81031	2.82584	2.80482	2.83024	2.58763	2.4175	2.50272	2.76884	3.10242	3.03074	4.80036
FBgn0264834	0.996961	0.452501	0.773629	0.374278	0.0462448	0.270571	0.485994	0.434723	0.661121	0.667337	0.385219	0.559631	2.37073	1.718	2.2333	0.309572	0.357702	0.284566	0.189548
FBgn0039946	1.23242	1.05291	1.11992	0.854141	1.09499	0.777852	1.4162	1.37108	1.39768	1.54547	1.37536	1.78721	1.65843	1.44871	1.69676	1.4973	1.49065	1.43261	2.05997
FBgn0035027	2.68172	2.61445	2.79547	2.73256	2.55471	2.69235	2.86012	2.57216	3.03413	2.90141	2.87202	2.86469	2.68259	2.60507	2.621	3.08594	3.17387	2.98943	5.17155
FBgn0051961	2.87296	2.64993	2.93714	0.740806	1.42754	0.685544	3.29835	2.88896	2.9693	2.62612	2.67994	2.71598	3.36418	3.26248	3.22409	2.62057	2.37866	2.27991	2.36902
FBgn0267337	4.54984	4.20173	4.7977	0	0.234913	0	1.33577	0.900986	1.87099	0.741977	0.470482	0.944557	5.16431	4.79605	5.24763	0.34206	0.226912	0.13115	0
FBgn0267336	3.95285	2.41567	3.0765	2.52671	2.77515	2.22532	5.0293	2.29173	4.01875	3.80608	2.65375	2.71102	2.95531	4.05177	3.37128	2.89765	2.44679	2.33543	1.48156
FBgn0267330	6.37928	6.73179	6.20629	7.12198	7.45199	6.88508	6.60877	7.05184	6.41887	9.12814	9.09643	8.91444	6.92912	7.35541	7.16389	8.54295	8.86039	8.78161	6.27107
FBgn0265784	4.36165	5.19963	4.69436	2.71642	3.00793	2.75569	5.45572	5.08757	5.12169	5.3644	4.60572	4.98947	4.46876	5.09841	4.78355	4.43096	4.59226	4.26244	5.32512
FBgn0021967	7.69677	7.65948	7.36652	9.83526	9.29606	9.3168	6.88823	7.01355	6.6717	5.68921	6.01151	5.69209	6.50552	6.34217	6.41304	5.88522	5.93933	5.93245	6.74089
FBgn0260746	0.638532	1.60164	0.354877	3.75132	3.60002	3.22582	0.587298	3.10738	0.531383	1.67027	3.57788	0.945093	1.15125	2.72833	0.961322	4.98173	7.95061	4.59116	3.87497
FBgn0264785	5.21765	4.64873	5.41574	3.35133	3.905	4.3863	6.28173	5.73851	6.15614	5.91377	5.44157	6.09158	5.28494	5.23709	5.47909	5.72447	5.56124	6.05815	6.21706
FBgn0022774	3.88259	4.39382	4.10897	8.31327	8.18009	8.41977	4.99544	5.21794	5.53055	3.56306	4.28666	4.23611	4.2907	4.69895	4.63396	3.10709	3.47773	3.85653	4.99822
FBgn0030217	1.89072	1.98592	1.73344	2.57121	2.20054	2.59903	1.40225	1.47907	1.60194	1.42118	1.4338	1.53618	1.71497	1.6567	1.54191	1.66207	1.88343	1.78778	3.17019
FBgn0267253	0.702554	0.665234	0.643088	0.459345	0.390794	0.424763	1.48405	1.55576	1.13267	2.67279	2.052	2.0699	1.90116	1.51032	1.6266	5.47837	5.0503	4.79313	0
FBgn0020653	6.82061	7.80093	6.91531	7.34708	7.26306	7.21589	6.49862	6.86552	6.79485	6.51479	6.88097	6.36927	6.74443	7.24915	6.976	6.63822	6.86588	6.70466	7.80922
FBgn0023506	3.1832	3.30284	3.36448	2.30682	2.49982	2.8778	3.01124	3.12472	3.16457	3.15781	3.04842	2.75883	3.31573	3.16278	3.20883	3.28689	3.28249	3.31397	4.94274
FBgn0023507	6.26332	6.19022	6.53308	9.61175	9.63	9.88761	5.60371	5.82522	6.00478	5.17422	5.90178	5.93817	5.49452	5.82493	5.88836	5.12443	5.27692	5.77439	5.70949
FBgn0023508	4.36017	4.1344	4.74303	2.96159	3.24913	3.15702	5.03294	4.33404	5.34624	8.53605	8.28768	8.232	5.54499	5.36009	5.89641	5.10161	4.9348	5.21367	5.37067
FBgn0053995	2.90752	2.48883	3.35937	0	1.08647	0	1.95398	2.08263	2.90115	3.90538	2.76168	0	0.833697	2.36157	2.14492	2.196	2.65689	1.24184	0
FBgn0035851	2.40438	2.46593	2.77008	1.46522	2.2317	1.63576	2.62872	2.41903	2.85431	3.06657	3.1829	3.06356	2.60909	2.70421	2.78741	3.44292	3.55377	3.57016	4.50092
FBgn0035850	4.59273	4.23366	4.75846	5.91433	5.6538	6.21522	4.9058	4.49031	4.81946	5.51364	5.44682	5.45557	4.85441	4.53907	4.77177	5.7314	5.758	5.86776	5.71187
FBgn0035854	2.19303	3.39638	2.01923	4.05974	4.11641	3.99536	1.97842	2.85235	1.68562	2.51612	3.08089	2.48401	2.14976	2.56976	1.91002	2.91609	3.07196	2.86874	3.95574
FBgn0028622	6.04908	5.70811	5.86541	1.27971	0.608367	0.771265	4.87979	3.86924	4.96533	2.68845	2.4601	2.34951	5.31782	5.22809	5.31944	3.89176	3.26881	3.6635	2.77452
FBgn0032494	8.12784	8.25682	8.01333	1.39967	1.25022	1.29023	4.54413	5.02948	5.36135	3.77882	3.86549	3.43691	6.41035	7.3864	6.24816	8.66863	7.47688	8.29889	2.85829
FBgn0032495	3.78169	2.42381	3.59716	0	0.15447	0.124622	2.84049	2.22128	3.02234	2.38809	1.90825	2.0496	2.28163	2.51736	2.43846	2.47016	1.23594	2.00179	0.442083
FBgn0032499	3.75473	3.70599	3.8067	3.8015	3.57505	3.76814	3.53644	3.28281	3.66567	3.71445	3.64309	3.573	3.3977	3.4163	3.47494	3.77807	3.94621	3.97016	5.26767
FBgn0001247	4.76929	4.35493	5.01865	3.04157	3.8964	3.03689	5.05083	4.46769	5.2066	5.10544	4.89592	5.01462	4.64528	4.70399	4.91556	4.99503	4.97591	4.94303	4.09032
FBgn0053196	5.89706	5.90937	5.88228	0.404938	0.633309	0.424596	8.51365	6.7474	8.13889	5.76257	4.48515	4.51716	6.19685	6.65491	5.77002	5.43045	4.67494	4.05056	0.554177
FBgn0053193	3.59024	3.63513	3.73339	2.89769	2.9217	3.033	3.20506	3.08786	3.44081	3.17957	3.23892	3.07848	3.38968	3.36581	3.40531	3.43156	3.58622	3.58924	5.81811
FBgn0015039	5.81634	5.05218	5.34161	7.02226	6.51991	7.29355	2.43154	3.15742	2.93196	4.50114	4.84315	4.91507	3.11963	3.04542	3.36198	7.11052	6.90042	7.12991	5.1063
FBgn0053198	3.09814	3.14731	2.92946	2.67625	2.64749	3.56942	3.00259	3.42482	2.68358	2.95585	3.0907	2.83838	3.58431	3.08946	3.13788	2.70422	3.0076	2.80092	2.18283
FBgn0053199	7.45311	7.16033	7.28389	7.53136	7.09183	7.63818	6.81632	6.90035	6.47242	6.31357	6.32882	5.94329	6.04824	5.95046	5.87409	5.70976	5.38994	5.51193	5.52334
FBgn0034509	9.60608	9.43286	8.47998	3.64458	2.55637	2.4628	3.75113	3.89664	4.35338	3.66519	3.29337	2.72772	3.87922	3.45104	3.95778	3.73028	3.25776	3.32059	2.11201
FBgn0261706	4.47655	5.46379	4.59059	5.54787	5.36601	5.64216	4.64028	5.69819	5.07196	5.45851	6.83178	5.97178	5.7672	5.81187	6.18911	10.8213	10.7855	10.4978	0
FBgn0005636	1.24081	1.82896	1.34096	0.991449	1.03869	1.74718	0.82137	1.06184	0.790228	0.237283	0.45548	0.447482	1.61752	2.08211	1.65954	0.221033	0.215352	0.309458	0.99541
FBgn0052821	3.50676	4.99354	3.52553	0.166911	0.359	0.126554	0.287825	0.75061	0.58976	0.196029	0.708987	0.183611	0.483674	0.910622	0.499333	0.113703	0.273618	0.0943591	0.0659886
FBgn0005631	2.88937	2.3299	3.16391	0.490491	0.641936	0.413077	3.76035	2.52864	3.64342	3.34083	2.58682	3.14989	3.0828	3.13133	3.33598	3.23251	3.09155	2.83374	0.433926
FBgn0019936	8.80389	8.6479	8.56806	9.40588	10.222	9.98087	8.81	8.81949	8.42918	9.51998	9.91337	9.66958	8.691	8.516	8.65533	9.27193	9.15983	9.45726	7.71925
FBgn0003062	3.84906	6.57984	3.39497	7.03791	7.51487	7.0403	3.66412	5.62817	3.67162	4.46872	5.14531	4.73203	4.03544	5.21534	3.72052	5.22014	5.00041	5.0193	7.0238
FBgn0035879	4.18804	4.11476	4.6376	1.50224	2.58748	2.10501	4.45166	3.92702	4.47432	4.68579	4.33433	4.68763	4.41288	4.49789	4.53584	4.95388	4.93749	4.86967	3.5819
FBgn0003068	2.85159	3.14283	3.87265	2.07138	2.07891	3.19305	3.27661	2.69235	3.84774	4.20639	4.47275	4.84676	3.43837	3.76081	4.44868	4.62142	4.05128	5.39134	2.15814
FBgn0035878	4.263	5.54657	4.10113	5.53195	5.76875	5.58631	3.86331	4.69342	4.11427	4.07809	4.4354	4.00279	4.15957	4.57262	3.82995	4.64463	4.78413	4.55616	7.79521
FBgn0037008	2.8944	2.96245	2.92574	1.98462	2.3892	2.31826	2.88055	2.85748	2.84304	2.69325	2.8793	2.86613	2.65918	2.63475	2.63674	3.10131	2.77739	2.87404	1.85307
FBgn0035877	5.01435	3.40601	5.26501	3.2851	4.23391	4.9303	5.36643	4.06716	5.20737	4.59628	4.22009	4.73418	4.65786	3.82315	4.76594	5.11297	5.01376	5.18989	2.92843
FBgn0266572	2.85819	2.90697	3.13035	1.73268	3.56113	2.82034	3.58263	3.18031	3.64729	4.33843	4.0969	4.2017	3.40484	3.50157	3.44572	4.33652	4.38449	4.40926	4.93319
FBgn0083968	5.00533	5.90069	4.21143	7.48102	7.26062	6.90644	4.44315	5.2027	4.05056	4.00512	4.39759	3.72573	4.61949	4.67071	3.89014	4.3171	4.25848	3.9246	5.14433
FBgn0260960	6.36949	6.77834	6.23732	5.75301	6.84776	6.48433	4.97289	5.23311	4.91227	5.16887	5.28981	5.54149	5.66642	6.43758	5.73657	5.34543	5.6813	5.2351	4.98391
FBgn0085249	0.183907	0.882625	2.40966	0.308413	0.0946517	0.226719	2.53466	0.571059	1.79171	0.861933	0.459547	0.474979	0.316017	0.314624	0.362615	0.22596	0.148162	0.197331	5.60283
FBgn0040777	6.52635	6.08913	6.93935	5.37362	6.34449	6.31878	7.29029	6.46211	7.18966	7.08697	6.79465	7.04258	6.83195	6.45001	6.97285	7.31501	7.05271	7.37665	5.0667
FBgn0260962	4.30524	4.50369	4.57399	3.82334	4.30666	4.0691	4.41776	4.40071	4.57703	4.97473	4.91398	4.98347	4.41331	4.47242	4.43367	5.22154	5.05546	5.17593	6.11549
FBgn0000464	1.68355	1.55488	2.11814	0.734784	0.530141	0.330276	3.08738	1.58422	2.90086	2.67151	2.11177	2.76918	1.97674	2.11506	2.4619	2.55493	1.77024	1.9594	2.8934
FBgn0028331	6.21107	5.7087	6.27299	3.98265	4.15277	4.18855	6.95598	5.64831	6.53589	6.99616	6.22074	6.73013	6.41893	6.40591	6.44276	8.1549	7.52762	8.1333	6.55741
FBgn0028336	7.34711	7.1557	7.4676	8.3599	8.72915	8.63136	6.77182	6.68452	6.99164	5.31936	5.90095	5.72639	6.05793	5.96019	6.40053	5.808	6.03941	6.13326	8.22807
FBgn0034968	9.27856	9.18856	9.22374	10.1887	10.5137	10.8777	9.16043	9.03498	8.91223	9.91247	10.3272	10.1834	9.10309	8.98497	9.29862	10.04	9.93718	10.4509	8.52278
FBgn0261553	5.80022	5.07157	6.3784	1.90392	2.24835	1.88808	5.8263	4.35927	5.59569	6.52399	5.82052	6.7844	5.13958	4.75385	5.68368	5.45728	5.12577	5.2867	5.037
FBgn0261552	4.32169	3.58965	4.65527	4.22649	3.26108	3.7443	7.80272	3.56749	5.17037	5.05754	3.95246	5.17608	3.52702	4.20827	3.86088	4.06853	2.96092	3.33538	1.62015
FBgn0261550	5.14164	5.20597	5.49472	4.25615	4.6421	4.79141	4.63076	4.36722	4.95173	5.07823	4.81622	5.2026	4.97825	4.97341	5.22371	5.73545	5.98658	5.91392	6.30083
FBgn0261555	5.35963	4.92834	5.91535	0.518801	1.39474	0.375047	5.42822	4.85258	5.04868	2.37496	2.58769	2.30985	5.38926	5.28439	5.62638	2.92852	2.93958	2.43711	0.814406
FBgn0261554	4.1284	3.83732	4.41039	5.53798	6.12902	5.97992	5.15435	4.32288	5.04192	4.87402	4.8667	4.98823	5.48824	5.52661	5.75659	5.49413	5.7717	5.34518	5.24771
FBgn0259705	4.37117	5.08123	4.08836	3.98622	3.6127	3.35378	3.95702	4.32031	3.64672	3.19798	3.84398	3.32295	3.64582	4.09453	3.46142	3.8247	3.91785	3.5641	3.75284
FBgn0028647	1.72407	1.45648	1.95703	0.175828	0.907805	0.317507	2.34207	1.5922	2.47113	2.05263	1.97644	2.00041	1.87538	1.95512	2.00688	1.99882	1.74355	1.67431	2.17345
FBgn0038467	3.94725	4.58027	4.09964	6.30116	5.96829	6.17586	4.11477	4.49739	4.36197	4.50746	4.73801	4.64586	4.62003	5.00098	4.53618	4.7302	4.68632	4.84125	5.38246
FBgn0038466	0	0.129749	0.151264	0.784081	0.906786	1.78584	0.60674	0.823719	0.591185	0.359309	0.668087	0.94473	1.65275	1.91235	2.20672	1.21814	1.41438	1.60729	2.3901
FBgn0035145	3.20602	3.39429	3.66076	1.48329	2.56447	2.18724	3.5626	3.15435	4.14053	4.15603	4.00137	4.03874	3.73156	3.88048	3.94014	4.2569	4.39162	4.36214	5.3087
FBgn0035144	3.32044	3.05336	3.53405	0	0	0	2.17753	1.67293	1.7394	1.12853	1.28865	1.18648	3.33562	3.317	3.42157	1.28673	1.15181	1.04222	0.383401
FBgn0038463	3.25943	3.71713	3.47996	6.69948	6.57303	7.15219	3.41536	4.10956	3.85501	4.70968	4.8145	5.13153	4.13231	4.4456	4.55193	4.58953	4.42028	5.04737	4.16549
FBgn0038462	5.00273	5.39348	4.69377	5.8199	5.05532	5.2705	4.84638	5.28518	4.50633	4.63914	4.87093	4.49024	4.79176	4.87415	4.50809	5.03222	5.14841	5.13647	5.20607
FBgn0038461	4.19098	4.42941	4.04601	5.3669	4.50977	4.86904	4.13728	4.34882	3.64934	4.18356	4.4488	3.9938	4.10967	4.27112	4.0092	4.31032	4.51808	4.33807	4.42325
FBgn0260464	4.12179	3.23586	3.79766	0	0	0	2.48199	3.92934	2.28624	0	1.8365	0	1.87886	2.88998	3.40922	1.42204	1.50576	0	2.94403
FBgn0085397	1.41016	0.915011	1.53273	0	0.230021	0	3.30796	2.13566	3.03644	0.178124	0.246556	0.129084	1.07014	0.931491	1.03307	0.444442	0.0862171	0.1919	0.156917
FBgn0067779	3.00283	2.26794	3.36503	4.04053	3.57932	3.4384	4.53014	3.12521	4.1198	4.20899	3.46517	3.8651	3.84675	3.51387	4.05566	3.98333	2.82864	3.06153	1.38781
FBgn0038056	3.78906	3.85168	3.66928	5.07328	4.56527	4.48834	3.85377	3.59311	3.80826	3.79962	3.86279	3.59111	3.4085	3.49884	3.53511	4.02238	3.69377	3.74286	3.58472
FBgn0034438	6.08947	5.73366	6.17664	0	0.782377	0.699981	5.26726	5.15681	5.18389	2.30211	2.151	2.07408	5.59715	4.88183	5.34202	2.46789	1.83678	2.03858	1.19242
FBgn0034439	1.2071	0.841362	1.10743	0	0	0	1.28734	1.2815	1.08688	0.0246252	0.127758	0	1.08305	1.56953	1.03147	1.77423	1.84898	1.58551	0.747455
FBgn0031914	4.46622	3.88129	3.63698	0	0	0.42332	2.95956	2.72442	2.80767	2.23243	1.95787	2.00888	4.67068	4.29026	4.64596	2.32185	2.81998	2.51145	3.08237
FBgn0034436	3.81045	3.04915	3.79235	2.80367	4.04457	3.70588	3.49292	3.13133	3.76945	6.08986	6.33122	6.18178	4.24697	4.04245	4.64272	7.06207	6.67579	6.99611	2.73414
FBgn0034430	3.61236	3.88019	3.30876	3.91804	3.7246	3.92081	3.20156	3.50086	3.08399	2.9543	3.19602	2.91746	3.30089	3.19081	3.10646	3.1138	3.51524	3.07008	5.54343
FBgn0034432	6.50053	6.57206	6.40847	8.5456	8.71774	8.88987	6.4424	6.44102	6.5098	6.63683	6.6803	6.55118	6.64396	6.59539	6.68622	6.34093	6.39796	6.3554	6.51582
FBgn0034433	1.58331	1.33681	1.67976	1.27686	2.05833	1.42941	1.79556	1.90622	1.88838	1.27007	1.07832	1.23723	2.51285	2.02873	2.16602	1.29623	1.20012	1.11531	3.76537
FBgn0017581	7.9544	7.52605	8.34161	6.84575	6.81042	6.20786	9.31437	7.87235	8.82816	8.14306	7.18043	7.97907	7.81742	7.56093	8.22616	7.93399	6.95684	7.1652	5.71686
FBgn0038720	4.73087	5.72818	4.53363	0.389689	0.15447	0.122888	5.54923	5.76608	5.17622	2.37836	2.69372	2.02991	3.88405	4.25068	3.82363	4.93156	5.50219	4.72585	2.77572
FBgn0038721	3.92428	4.10381	3.61081	2.97226	4.6554	3.011	3.2766	3.2792	3.21678	4.58561	4.16376	4.11896	3.6035	3.96812	3.70627	5.1779	4.91057	4.76218	2.13722
FBgn0038722	3.05155	3.20531	3.18938	2.01381	2.59813	2.66917	2.8969	2.8512	3.23178	2.41149	2.59687	2.43072	2.93918	3.00483	3.02777	2.88454	2.87189	2.87895	5.69399
FBgn0038723	4.68111	5.21287	4.48385	6.22439	5.97487	5.74159	4.25773	4.76715	4.29495	4.27276	4.67259	4.13149	4.37155	4.54337	4.18337	4.62877	4.79055	4.75553	6.06347
FBgn0030530	3.79413	3.86016	3.66078	3.81721	3.55086	3.9072	3.52772	3.39668	3.60985	3.6889	3.85285	3.58416	3.6008	3.70142	3.5429	3.94745	4.03707	3.9659	6.59929
FBgn0039500	2.4083	2.27525	2.73726	0	0	0	1.8714	1.72464	1.92694	0.238604	0.407566	0.426533	2.60728	2.56663	2.5363	0.360007	0.39478	0.512173	0.417136
FBgn0019637	2.92278	2.81311	2.91744	3.3269	2.66784	3.48896	2.9559	3.0893	3.47771	3.56418	3.73655	3.30901	3.37915	2.58115	3.06613	3.76919	3.87775	3.75222	5.85828
FBgn0036945	1.15707	0.905781	1.11793	5.60395	4.51019	5.60181	2.5874	2.32343	1.99764	2.58372	2.87383	2.89356	1.9095	1.74823	1.81213	2.54452	2.13704	2.52776	3.7403
FBgn0063670	5.98108	6.21732	5.24947	6.22883	5.74637	5.70192	5.2998	5.60594	4.79571	4.71296	4.70523	4.3865	5.78781	5.36236	5.04646	4.86191	5.08589	4.68493	4.99336
FBgn0010808	6.56609	6.51863	6.5394	6.78256	6.7003	7.02728	6.4306	6.30038	6.24966	5.50197	5.66556	5.45162	5.66456	5.60265	5.728	5.56412	5.4907	5.62707	5.16219
FBgn0036702	5.50109	5.83836	5.64945	5.79349	5.62169	5.79342	4.91683	4.90721	5.1212	5.09753	5.27458	5.17348	4.89222	5.20225	4.86213	5.35309	5.37289	5.46661	6.49947
FBgn0010803	4.51192	5.3804	4.26017	4.80446	5.3774	4.57606	4.13223	4.71806	4.09637	5.29873	5.60052	5.03738	4.38204	4.80589	4.17265	4.88147	5.34499	4.99016	6.02174
FBgn0085468	6.77001	6.67726	6.48823	7.58513	6.83251	7.41732	6.20935	6.2484	5.76415	5.07624	5.19088	4.86262	5.93801	5.65086	5.72058	5.12818	5.24798	5.13217	3.83822
FBgn0031627	2.39183	1.83824	2.46442	0	0	0	2.51931	1.41254	1.93659	0.442301	0.453936	0.513079	1.69232	1.51059	1.9835	1.81922	1.14519	1.69902	0.397727
FBgn0262476	1.95523	1.87639	2.63703	0	0	0	3.13387	2.17152	2.82617	0.550705	0.305178	0.476025	3.10915	2.82229	2.73296	0.555983	0.178394	0.218828	1.63718
FBgn0031628	1.73385	1.33534	1.8457	1.00652	1.11372	0.775298	1.47278	1.12747	1.33584	1.51148	1.68365	1.41568	2.01719	1.74166	1.72378	1.75411	1.5689	1.80605	1.45299
FBgn0035610	0.246284	0.136854	0.295987	0	0.124871	0	0.0636803	0	0.0611389	0.359442	0.30317	0.39665	0.123389	0.141843	0.193618	2.88092	2.49832	2.86732	0.171511
FBgn0032476	3.49434	3.48172	3.57002	2.94352	2.55178	2.4	3.52719	3.24715	3.57592	3.34208	3.38081	3.11399	3.5348	3.50686	3.61303	3.25367	3.09455	3.20026	4.21439
FBgn0038095	0.636822	0.864609	0.550944	6.41479	5.54844	5.47067	0.946596	1.26008	0.675608	1.51873	1.87707	1.38036	1.44163	1.30302	1.13629	1.43228	1.06112	1.13111	1.16812
FBgn0039357	2.98505	3.46612	2.7829	4.76414	4.85362	4.81041	2.63691	2.68421	2.32969	2.60432	2.83205	2.65465	2.20206	2.69193	2.2824	2.43342	2.96662	2.53055	3.36823
FBgn0038099	1.6409	1.09551	1.87866	0	0.063786	0.321931	4.64182	4.02409	5.00583	4.09614	4.19143	4.00307	4.5141	3.97907	5.03692	1.45207	0.599251	1.05705	5.05863
FBgn0265276	2.92665	2.35597	2.95925	2.38049	2.25661	2.29142	3.958	2.15618	2.94889	3.7276	2.79084	3.31441	3.07805	2.97099	3.22562	3.42325	3.14951	3.08219	1.69776
FBgn0265274	5.17539	4.16426	5.14389	3.82573	3.76176	4.0969	4.74372	4.6532	4.85163	4.77423	4.7227	5.19652	5.02848	4.58955	5.296	7.48515	6.86684	7.85197	2.35684
FBgn0031450	4.23383	4.30613	4.44048	3.06898	4.16302	4.02271	4.39384	4.15942	4.44503	4.563	4.41019	4.53236	4.43679	4.57781	4.69624	4.58768	4.77911	4.98305	6.0207
FBgn0032472	3.80976	4.70428	4.07759	9.21895	9.67568	9.75306	4.1261	5.68652	4.49468	5.23854	6.09421	5.69038	5.42755	5.88785	5.4322	4.73345	4.43401	5.13839	3.06206
FBgn0031321	2.52894	3.37009	2.18281	3.81298	4.03268	3.87517	2.11206	2.92091	2.28317	3.03323	3.39239	3.13222	2.4875	2.76843	2.39145	3.40469	3.43618	3.34606	4.48208
FBgn0264002	2.05551	1.11752	2.14922	0	0.063786	0	0.822948	0.49044	0.963647	1.21135	0.96765	0.916243	0.899717	0.708548	1.15773	1.34411	0.564224	1.16887	0.553045
FBgn0031327	3.27016	3.12064	3.33256	0.175828	0.456573	0.53455	5.5235	5.51214	5.57949	2.25594	2.28404	2.28889	5.31649	5.33849	5.4728	3.51625	3.85944	3.90544	2.18271
FBgn0262685	0.298196	0.132575	0.532239	0	0	0	2.65683	2.9121	2.89	0	0.0904678	0	0.0939226	0.22553	0.503662	0	0.0416897	0.037952	0.0327785
FBgn0040384	5.35561	4.55951	5.55359	4.99311	4.98813	5.62316	4.66247	4.12081	4.89999	4.71566	4.74389	4.78411	4.56236	4.23086	4.75676	5.3309	5.53798	6.00749	4.73505
FBgn0040383	5.00339	4.5632	5.07607	8.14348	7.28605	7.06351	5.00068	5.00507	5.1454	3.08706	3.11426	3.00675	4.14879	3.71198	4.05006	2.52345	2.16831	2.4369	3.60177
FBgn0040382	8.79125	8.35306	9.16898	0.981312	2.21403	2.08038	9.26118	7.88135	9.16543	6.59762	6.24349	6.60298	8.25837	8.34894	8.46145	6.60718	6.17567	6.3772	4.0533
FBgn0051207	4.94524	4.20558	2.90888	0.366511	0.450265	0.124622	0.543482	0.124636	0.323989	1.07851	0.701312	0.115305	0.843883	0.400524	0.263675	0.557444	0.19078	0.114083	1.14871
FBgn0040389	4.11853	4.45378	3.74401	4.8923	4.66761	4.84845	3.26915	3.70339	3.22034	2.67785	3.00694	2.70149	3.41422	3.53731	3.25437	3.00615	3.10265	2.9675	4.38541
FBgn0040388	2.65348	2.51808	2.28755	0.6026	0.61149	0.286825	1.57443	1.26617	1.80922	1.21845	1.07034	0.804888	2.67655	2.65229	2.47685	1.53184	1.76419	1.42242	5.55653
FBgn0051201	3.98085	3.82737	4.43761	0.539674	0	0.173793	2.8234	2.90308	3.12513	1.34107	1.46397	1.3793	4.01491	3.86269	4.32018	1.66154	1.05865	1.4513	0.505419
FBgn0037163	1.42849	1.1698	1.39741	4.33622	4.69515	5.00902	2.13196	2.16286	2.07397	4.7178	4.30512	4.37138	2.36019	2.20642	2.31865	5.50512	5.06125	5.02542	2.69734
FBgn0026592	3.93395	3.49338	4.02644	0	0	0.288258	3.1768	3.2909	2.76613	1.01669	0.900998	0.79072	2.96281	2.61648	2.94739	1.9844	1.53517	2.15375	2.55146
FBgn0026593	2.8367	3.24711	2.85014	6.85302	7.25299	7.15176	2.35341	3.11617	2.45354	3.67788	4.09571	3.52745	3.27838	3.62328	3.25452	3.29243	3.34568	3.12475	3.76153
FBgn0037167	1.38356	1.60083	0.836411	7.38536	6.72105	6.09171	1.29495	1.7932	0.937625	1.92381	2.24845	1.64423	2.17852	2.05586	1.40191	1.47572	1.49432	1.44719	1.86531
FBgn0026597	3.3749	3.19321	3.62343	1.50224	3.00912	2.25363	3.75365	3.12667	3.80898	4.13075	3.52569	4.00731	3.54172	3.55941	3.59795	3.84956	3.91573	3.973	4.81738
FBgn0026598	1.58007	1.77196	1.98915	3.6184	4.54888	4.22338	2.02734	2.21214	2.3792	2.82512	2.75816	1.94852	2.71842	3.0393	2.3219	2.08609	2.25531	1.70379	5.63446
FBgn0030396	3.20808	3.00773	3.41283	0.0905911	0.209423	0.335575	2.9286	2.30437	2.90417	4.8326	5.1331	5.16324	5.90063	6.44142	6.38264	2.06649	1.96239	2.37076	5.35776
FBgn0030391	4.1797	3.34666	3.95395	1.17855	2.45522	2.38487	4.84571	3.89567	4.58481	3.74327	3.51826	3.81949	4.03587	3.65386	4.0491	3.87426	3.86404	3.93399	4.23847
FBgn0025865	3.73978	4.18046	3.71517	2.25597	3.35584	2.95284	4.07885	4.0555	3.98654	3.3482	3.49923	3.39205	4.39821	4.73529	4.47119	3.65366	3.6024	3.61059	4.51085
FBgn0025864	4.46027	4.25877	4.84391	3.01255	3.98016	3.76857	5.22175	4.2444	5.13501	5.00303	4.60848	4.97673	4.59756	4.57531	4.59753	5.22169	5.15542	5.32319	6.07071
FBgn0037176	4.88874	4.81331	3.99968	5.56647	4.81935	4.48919	6.21881	6.35576	4.79321	13.1084	12.8474	12.596	5.81221	5.54398	5.34719	5.4643	4.58655	4.701	0.171511
FBgn0025866	5.65323	5.69488	5.6324	1.86965	2.75823	2.27471	5.75753	5.61756	5.61303	5.29661	5.01435	5.23073	5.43055	5.56964	5.42436	5.95806	6.08777	6.32349	5.4532
FBgn0037536	6.84053	6.6974	7.10071	4.45238	5.29622	5.52518	6.57435	6.36694	6.59556	5.64498	5.63193	5.67188	5.99223	6.22394	6.19776	5.78282	5.81908	5.81932	6.07295
FBgn0033005	5.56925	4.38534	5.49277	4.17768	3.95535	3.42997	5.80718	5.38739	5.50055	5.16053	4.63143	4.85557	4.89707	4.50611	4.78382	5.12	4.50539	4.40598	2.99753
FBgn0016983	4.1159	3.98284	4.45576	3.06733	4.66049	4.09079	4.73721	4.45535	4.92148	4.5247	4.40559	4.6497	4.36621	4.38588	4.51616	4.596	4.65249	4.74051	5.8883
FBgn0016984	6.07281	6.05067	6.34611	2.2441	3.408	3.42267	6.37031	5.98151	6.33117	6.43405	6.1458	6.51416	5.82907	6.05661	5.97369	6.46742	6.45958	6.61994	6.50894
FBgn0036118	3.96294	4.31161	3.68499	4.57523	4.24169	4.49259	3.91043	4.06101	3.39344	3.41922	3.71944	3.16476	3.43078	3.80691	3.36275	3.12579	3.6219	3.15868	3.40375
FBgn0033842	3.98565	4.15242	3.71963	4.33335	4.07984	3.80638	3.29334	3.28636	3.07974	2.73654	3.20928	2.66116	3.13632	3.32199	3.08517	3.12431	3.47277	3.17703	5.0343
FBgn0033844	5.10104	5.86561	5.08369	4.88306	5.51173	5.27419	5.2835	5.48033	5.31388	5.04461	5.1951	5.07784	5.49081	5.89941	5.57502	5.2003	5.49405	5.2858	5.65316
FBgn0033845	1.97828	1.49554	1.98475	0.539674	0.984453	1.27669	3.32971	2.83801	3.5418	2.63943	2.36241	2.69508	2.66247	2.26714	2.43721	2.91009	2.57971	2.68066	6.41839
FBgn0033846	2.66929	2.71538	2.98974	1.40726	2.69964	1.93453	3.13301	3.12104	3.44836	4.19692	3.86458	3.85673	3.21939	3.23141	3.40552	3.92863	4.24986	4.19872	5.5868
FBgn0039415	1.44315	1.15441	1.60492	0.677479	0.260751	0	0.833367	0.673597	0.576503	0.32283	0.921424	0.227346	4.99728	4.39149	4.59254	0.688736	0.891077	0.573758	0.132824
FBgn0033000	6.08514	6.2957	5.29623	6.12737	5.71489	5.57058	5.72619	5.86133	5.08985	4.63648	4.57453	4.32317	5.71488	5.36578	4.73034	4.7029	4.8625	4.33648	5.67947
FBgn0039411	0.232572	0.075762	0.114376	0	0.192732	0.0749816	0.434945	0.420077	0.324802	6.9923	6.32298	6.8788	0.188983	0.159448	0.186669	0.275167	0.239896	0.288092	0.0648288
FBgn0266243	1.13919	2.42247	1.18109	1.66898	1.17321	1.25515	0.960129	1.06471	0.750937	1.23641	1.01799	1.20231	1.23001	1.28457	0.978594	0.611707	1.18024	0.817598	0.256852
FBgn0030321	4.36709	5.32318	4.39162	4.89128	5.58293	4.77922	4.43796	4.97342	4.45609	5.59637	5.55372	5.44221	4.60009	5.01953	4.58718	5.27997	5.20197	5.22564	6.21723
FBgn0037114	1.28516	1.1855	0.68364	0	0	0	0.78831	0.497542	0.579269	0.0464398	0	0	1.48217	1.13699	0.87914	0.0729099	0.186705	0.076837	0.0593216
FBgn0265665	0.0859793	0.114581	0.102675	0	0	0	2.05489	2.27167	2.22042	0.0315323	0.0273461	0.0354219	0.0766782	0.21073	0.162215	0.0144614	0.0377447	0	0.0542243
FBgn0037709	3.45539	3.48683	3.52247	4.77194	4.87897	5.23919	3.6878	3.84501	3.98645	3.12803	3.43002	3.25808	3.04794	3.19771	3.19703	3.30615	3.40547	3.52304	3.97899
FBgn0037708	2.18958	2.62479	2.13497	2.06179	2.17251	1.69699	2.16712	2.67018	2.27222	2.54674	2.70345	2.47728	2.15557	2.44747	2.31998	2.6198	2.57073	2.44868	1.60011
FBgn0037446	3.61489	3.39218	3.59353	2.87092	2.80688	3.69983	3.79596	3.75096	3.72304	3.4818	3.3814	3.2968	3.44496	3.5317	3.50045	3.83948	3.8799	3.84284	4.34915
FBgn0037031	2.20701	2.18813	2.37812	1.8567	2.19782	2.20955	2.13754	2.05283	2.22997	2.34707	2.44406	2.23937	2.29897	2.0414	2.07312	2.2527	2.36207	2.33369	3.80977
FBgn0037447	8.17004	8.71585	7.88861	1.20492	1.4428	1.27703	7.13535	7.14607	6.90363	3.96249	4.80922	3.64379	7.73855	8.10904	7.45447	4.24697	4.43187	3.6331	2.74064
FBgn0030328	4.61476	3.44432	4.99065	2.85946	3.51742	2.86537	5.64758	4.58231	5.59271	5.4401	4.95415	5.37493	4.62062	4.84752	5.46371	4.88707	4.78413	4.82589	5.92156
FBgn0023535	2.57502	2.92529	2.52424	8.72867	8.28618	8.59345	2.59923	3.51251	2.99906	3.59107	4.24582	4.28008	3.68927	3.85871	4.00215	3.22893	3.20147	3.86955	2.80434
FBgn0037179	1.89656	2.17656	1.54963	3.66842	2.94743	2.71425	2.69307	2.83633	1.69159	9.55724	9.6117	9.2906	2.57087	2.46357	2.09749	2.11396	1.74781	1.80556	0
FBgn0004510	2.80495	3.07785	2.73514	2.18585	2.38168	2.45029	2.64037	3.20378	2.69425	2.84214	3.02757	2.80369	2.74228	2.8427	2.66561	3.38874	3.2422	3.32877	5.74904
FBgn0004512	2.2428	3.18775	2.14413	0.230865	0.313422	1.11814	3.26311	4.15337	2.21995	1.20955	1.69451	1.07952	4.24239	4.50389	4.40957	1.52507	1.44049	1.69988	3.34766
FBgn0004513	3.81258	3.11658	3.90892	0	0	0.173793	3.77259	3.32439	3.74247	3.34287	3.05622	2.78797	2.43226	2.52225	2.84382	3.43302	3.03553	3.60946	1.23646
FBgn0004047	10.9294	11.0064	10.9396	16.6078	15.8765	16.2146	11.2734	11.8008	11.4919	12.4728	12.5671	12.8909	12.3	12.0592	12.3833	11.9395	11.3927	12.2983	11.0997
FBgn0004045	11.2916	11.3518	11.1803	15.9293	15.8102	15.42	11.8937	12.4102	11.9605	13.3558	13.1328	13.3783	12.8869	12.6471	12.7604	12.5305	11.8961	12.4331	10.7063
FBgn0034643	4.08399	4.08048	4.37152	2.84931	3.30619	3.03272	4.28383	3.99807	4.43226	5.10411	4.94261	4.89329	4.45119	4.59704	4.69403	5.12314	5.29053	5.23525	5.54335
FBgn0004049	3.36309	3.10761	3.76848	0.230865	0.898051	0.710239	4.55492	3.62565	4.45989	4.37589	3.68471	4.31562	3.51356	3.54048	3.7482	3.88811	3.56395	3.48228	3.12725
FBgn0015247	6.46074	6.8564	6.32297	6.36559	6.08	6.3226	5.93608	5.96485	5.76589	5.46332	5.64478	5.39998	5.81953	6.11853	5.88275	5.58161	5.59298	5.59602	5.82996
FBgn0050159	4.98984	5.24406	5.31093	4.24157	3.94205	4.56985	4.19178	4.46605	4.51159	4.2888	4.43641	4.4019	4.22198	4.20384	4.31921	4.68282	4.7093	4.72804	4.25441
FBgn0050404	4.3217	3.79824	4.44519	2.45791	3.50387	2.74727	4.89704	4.40581	5.01261	4.01201	3.88103	4.06443	4.33948	4.1391	4.31592	4.14337	4.08074	3.97431	3.47459
FBgn0263330	0.721541	1.38543	0.890312	6.30373	6.63783	6.29012	0.881865	1.61343	1.08857	0.967422	1.92186	1.64718	1.19564	1.81102	1.43716	0.770857	1.19421	1.412	1.03348
FBgn0050157	1.43413	2.02684	1.06978	3.53992	2.66152	2.30048	1.19794	1.52989	1.00225	1.43572	1.71653	1.2816	0.986318	1.28713	0.994323	2.01536	2.50613	1.78477	1.35235
FBgn0263336	0.944904	1.18968	1.27331	3.20005	3.49301	4.51318	0.5577	1.06552	1.31046	0.99196	1.52292	2.04325	1.20736	1.3472	1.85383	0.808228	0.782935	1.66374	0.506589
FBgn0003890	5.89329	6.10962	5.63209	8.09237	7.91135	7.95597	5.50988	5.62515	5.5483	5.36203	5.79488	5.51768	5.57071	5.92651	5.67488	5.29627	5.35717	5.44088	4.85952
FBgn0003891	5.77259	5.17802	6.03501	3.60697	2.93833	2.52527	7.76735	5.59299	7.19789	6.63191	5.14807	5.84061	6.12244	5.5556	6.244	5.97708	4.43427	4.47604	2.93257
FBgn0003892	2.81367	2.52819	3.12262	0.662896	0.858929	0.477432	3.64643	3.22097	3.59613	3.06568	2.57703	3.03131	4.61816	4.4879	4.8206	2.57293	2.27877	2.34212	0.701921
FBgn0021796	4.1757	4.24578	4.6994	2.60944	3.36089	2.36042	4.10967	3.52235	4.25287	4.2019	3.8954	4.11603	3.65248	3.93651	3.82072	4.30994	4.26949	4.0292	4.13065
FBgn0011230	5.63746	4.8704	6.13348	4.2421	4.29348	3.45234	6.96883	5.59608	6.82968	6.68136	5.98346	6.28965	6.28389	6.15556	6.59686	6.58763	5.90254	5.63295	5.11724
FBgn0010750	3.92236	4.27598	4.01545	4.65044	4.57878	4.11031	3.41065	3.6655	3.73551	4.04628	4.20276	3.95524	3.97699	3.98758	3.87942	4.25399	4.22878	4.1643	6.73042
FBgn0033751	6.1448	6.10066	6.37167	5.82348	5.70501	5.78643	5.51623	5.59826	5.82848	5.42702	5.59482	5.48397	5.7485	5.55425	6.02927	5.38061	5.39083	5.57322	5.5963
FBgn0035449	3.58802	3.55016	3.58332	3.28503	4.00839	3.99028	3.83903	3.91708	3.82243	6.47697	6.34676	6.19021	4.16803	4.072	4.17229	7.02602	6.6599	7.36342	4.11556
FBgn0035443	1.75191	1.8281	1.79828	1.85393	2.19678	1.55792	1.87525	1.50998	1.94843	1.69977	1.86207	1.72474	2.10516	1.99949	1.96994	2.42296	2.41775	2.2847	2.76146
FBgn0035440	4.88716	4.43838	4.83939	5.45717	4.69494	5.08083	5.21269	4.7667	5.12979	4.99545	4.94578	5.10279	5.05308	4.82315	5.22601	4.86771	4.62814	4.97781	4.66262
FBgn0035444	5.88313	6.33506	5.8366	5.78902	5.43409	5.85798	5.84006	6.20313	5.41821	5.23556	5.36677	5.48198	5.6496	5.75747	5.56424	6.10517	5.98125	6.21515	3.40993
FBgn0035445	0.332586	0.498197	0.572707	0.696192	0.805601	0.486019	0.682147	0.868823	0.657561	0.317665	0.454764	0.477031	1.03744	0.993609	1.35595	0.395589	0.267646	0.372988	0.210236
FBgn0020626	6.16584	6.25344	6.1175	6.65845	6.69787	6.45001	5.88401	5.80685	5.98044	7.01674	6.86834	6.7121	5.9972	6.42105	6.21344	6.71329	6.92957	6.80599	6.24951
FBgn0020620	3.60012	3.66546	3.88424	2.5729	3.48814	3.19372	4.28875	3.70935	4.139	4.24371	3.83825	4.18115	4.58174	4.66572	4.69719	4.0063	4.02187	4.16683	4.29543
FBgn0020621	4.72829	3.87797	5.31606	4.2612	4.87073	4.55661	4.9442	3.7438	4.84464	5.15591	4.07709	4.98392	5.68323	5.30608	6.09789	5.40359	5.28015	5.41572	4.32882
FBgn0020622	4.00081	4.08281	3.61768	3.41625	2.96117	2.47153	4.02267	3.25729	3.54673	3.72007	3.14417	3.52385	3.40146	3.29824	3.15191	3.62822	2.85088	2.94419	3.84599
FBgn0028430	0.487155	0.505726	0.448719	1.50224	1.10884	1.50122	0.909391	1.48848	0.93192	0.164917	0.492698	0.33489	3.23947	3.10088	2.73707	0.204615	0.244396	0.0558312	0.0435412
FBgn0033668	1.26877	0.86537	1.34805	0	0	0	0.38332	0.441877	0.244394	0.119126	0	0.222025	2.95246	2.58261	2.88347	0.776364	0.488592	0.854381	0.517206
FBgn0033669	5.51099	5.73544	5.40757	5.22023	5.00892	5.40153	5.18162	5.13772	5.14118	4.95871	5.08457	4.84443	5.19327	5.2024	5.16942	5.19998	5.32453	5.32334	5.29284
FBgn0001125	7.0424	7.57982	7.01828	10.4616	9.51239	10.5404	7.08841	7.64866	7.23881	6.4017	6.76711	6.90446	6.99624	7.17838	7.107	6.63872	6.684	6.90883	8.35044
FBgn0003046	11.2659	11.6463	10.9275	4.52948	4.4982	3.89827	4.87204	5.55797	6.24371	5.07535	5.70136	4.92257	6.1217	7.08338	6.57551	3.82126	4.06821	3.84296	0.657901
FBgn0032821	3.80879	3.14046	3.83067	2.41785	3.25828	1.66843	4.35275	3.15644	3.99951	3.99175	3.57776	3.81739	3.63668	3.62294	3.80232	3.61271	3.42153	3.1908	3.33448
FBgn0032820	5.25664	5.6178	5.49605	10.3683	10.0957	10.4957	5.10748	5.9042	5.41318	6.45833	6.91815	6.73691	5.7984	5.996	6.14578	6.27225	6.00335	6.71515	5.1394
FBgn0032395	2.28382	2.33008	2.67473	1.35988	2.27475	1.16202	2.99648	2.54682	3.17196	3.40501	3.1842	3.34023	2.59069	3.03964	3.07551	3.40052	3.69659	3.47641	2.18881
FBgn0032822	2.60458	2.80859	2.27999	3.11279	2.25982	2.52286	2.23099	2.80857	2.00286	2.37891	2.3401	2.24986	2.27878	2.12823	1.80443	2.25172	2.65788	2.09057	2.59063
FBgn0032393	5.03406	5.44126	5.00375	5.96022	5.75809	5.76633	4.3544	4.47742	4.37536	4.4046	4.70404	4.36395	4.60648	4.84161	4.60468	4.56438	4.54292	4.4977	5.44588
FBgn0032391	1.87166	1.71456	1.67122	0.842988	1.11375	1.28117	1.19401	1.58622	1.54625	1.51593	1.6279	1.50095	1.65124	1.86364	1.78509	1.44642	1.7839	1.59779	2.62672
FBgn0032390	2.04895	2.22289	1.66724	0.518801	0.436865	0.83353	0.954026	0.998093	1.09548	1.29834	1.44814	1.02196	2.22163	2.08802	1.80494	1.7209	2.00618	1.67048	5.2625
FBgn0003044	1.78432	1.75221	1.96733	0.837379	1.34614	0.556838	2.81969	2.25458	2.98541	2.83537	2.23167	2.68859	2.40735	2.3223	2.38192	2.48969	2.13726	2.01875	4.54577
FBgn0035624	2.66455	2.51676	2.50711	0.604656	2.15732	2.12747	2.6132	2.52581	2.55369	2.90367	2.66328	2.79594	3.07983	2.97356	2.8566	2.65671	2.85732	2.44027	2.5105
FBgn0035625	3.54076	3.50625	3.67859	2.24899	2.02644	1.81064	4.94867	2.25571	4.3458	4.46477	3.27935	4.20162	3.55685	3.67325	3.98337	4.03265	2.84218	2.8017	0.435155
FBgn0035622	4.55615	4.6278	4.53642	3.85993	4.78924	4.15683	5.04171	4.88569	4.99019	6.9297	6.84444	6.82137	5.11701	5.37362	5.43275	6.15135	6.57113	6.51918	4.56495
FBgn0035623	1.35866	1.34859	1.90705	0	0.211907	0.213173	3.44787	3.83203	3.22003	1.17596	1.83435	1.49268	6.02628	6.19506	5.99632	0.889202	0.411232	0.641969	0.164232
FBgn0003042	1.97377	2.10782	2.05738	0.710444	1.28723	1.075	2.54491	2.15687	2.38838	2.69137	2.32142	2.79018	2.16901	2.32483	2.35183	2.52152	2.46048	2.50233	3.1652
FBgn0261381	6.2045	6.41447	6.08003	7.11649	6.72752	6.74054	5.5035	5.92443	5.66665	4.9594	5.29477	4.95085	5.3522	5.50566	5.41089	5.26211	5.19295	5.24593	6.83688
FBgn0003517	10.6749	10.8998	10.1023	13.6671	13.6187	13.3358	10.1838	10.2712	9.98822	11.5599	12.0114	11.7258	10.1878	10.1858	10.1592	11.4435	11.2077	11.6326	10.1477
FBgn0013720	4.69623	4.79301	4.81011	1.03282	1.48863	1.41288	5.44784	5.06884	5.4098	5.34635	5.5805	5.56241	4.87623	5.23827	5.14992	4.82886	5.24294	4.74152	3.77665
FBgn0013726	4.68971	4.83584	4.43308	3.48674	3.39922	3.6126	4.85482	5.0364	4.74315	4.37731	4.25882	4.31086	5.87698	5.66968	5.60843	4.97431	4.64855	4.9344	7.15119
FBgn0034154	0.0149122	0.00874988	0	0	0	0.0443621	0.088453	0	0.0495576	1.46061	1.70888	2.02953	0	0.106905	0.0997797	0.134086	0.121444	0.0566169	0.0435412
FBgn0002022	5.06693	5.17079	5.06701	6.42397	6.56108	6.01706	5.1217	5.15082	5.22989	6.78251	6.79423	6.55548	5.35895	5.64196	5.43022	6.57506	7.0619	6.95253	5.40644
FBgn0261437	4.37301	4.71699	3.98865	5.70247	4.82617	5.2727	3.84308	4.3252	3.54816	3.88556	4.15612	3.75185	4.3595	4.25597	3.79385	3.9697	4.33854	3.75714	2.89822
FBgn0002021	4.43379	4.61724	4.3143	5.30433	4.78938	5.08869	3.78519	4.03205	3.7943	3.48431	3.82057	3.48156	3.67648	3.77302	3.71769	3.67026	3.76348	3.71161	4.82755
FBgn0039698	4.95919	5.04792	4.66381	6.0402	5.7096	6.01676	4.44753	4.59207	4.43838	4.30491	4.38262	4.05681	4.42715	4.49939	4.2942	4.23207	4.45453	4.24772	5.83601
FBgn0052121	2.80289	1.75855	2.84387	0	0	0	0.483103	0.247803	0.518035	0.698891	0.194018	0.444715	1.49584	0.890821	1.37393	0.386711	0.0831699	0.255801	0.545799
FBgn0032287	2.54636	3.40826	2.84479	8.86977	8.78777	9.06759	2.67451	3.77122	3.23751	3.87281	4.54844	4.44212	3.75439	4.16709	4.10695	3.39001	3.66022	4.15958	3.71164
FBgn0036550	3.61893	3.36819	3.38654	0.300282	0.134512	0.605145	3.46504	3.40676	3.12697	2.33664	1.65324	1.62612	4.20404	4.28771	4.46793	2.1596	1.63343	1.78824	0.473386
FBgn0028292	3.20191	3.19555	3.0423	3.63011	3.39093	3.42661	2.89638	3.0331	3.04662	3.19501	3.18734	3.05348	3.04985	2.89485	2.89037	3.38967	3.55261	3.57412	5.77385
FBgn0039259	4.67897	4.92271	4.3558	5.61438	5.05284	5.62149	4.49817	4.70603	3.98896	3.84009	3.95881	3.48283	4.44578	4.35096	4.03495	3.9127	4.39784	3.81326	4.03888
FBgn0032283	3.41961	6.0098	2.55712	1.51635	2.4662	1.93044	1.8686	2.22378	1.90795	2.49321	3.75668	1.83144	2.43664	3.37476	2.42839	2.04013	2.77787	1.46623	1.2066
FBgn0039252	5.63502	5.83104	5.74303	6.32334	6.31588	6.53565	4.94767	5.20413	5.28927	4.89442	5.159	5.04011	4.99235	5.16215	5.1401	5.16435	5.17386	5.29449	6.77626
FBgn0039257	0.133561	0.135574	0.0680182	0	0	0.06937	5.67274	3.59042	5.26702	0.260621	0.147774	0.0943468	0.39173	0.154581	0.446824	1.15455	0.489803	0.577543	0.117832
FBgn0032536	4.79094	4.91599	5.33797	0	0	0	5.45177	4.65847	5.24512	3.89183	4.24246	3.96579	2.69802	2.68654	3.00588	6.22811	5.87251	5.99247	0.871141
FBgn0039254	3.68037	3.80699	3.63625	3.33289	3.64893	3.58262	3.2194	3.30874	3.30033	3.08454	3.24806	3.07292	3.21192	3.3905	3.34414	3.41405	3.39717	3.48983	3.71823
FBgn0262524	2.05415	2.46406	1.71119	3.00218	2.94357	3.04908	1.18388	1.27503	0.934444	0.891559	1.09004	1.13405	1.43532	1.64263	1.41979	0.981644	1.08135	0.890493	2.18261
FBgn0265068	4.64525	4.61421	4.66756	3.01667	3.96673	3.962	4.79239	4.52045	4.94923	6.78535	6.86896	6.49144	5.70146	5.73299	6.10058	5.22657	5.40062	5.35252	4.98675
FBgn0260011	2.69279	2.74339	3.01069	0.575903	0.687908	1.02536	4.36857	4.61122	4.26361	2.1987	2.49713	2.24983	6.85755	6.63883	6.86354	1.5032	1.17582	1.55541	1.61468
FBgn0035298	5.15127	5.42711	5.0196	8.61763	8.11344	8.31798	5.06961	5.30727	5.06504	4.64881	4.98187	4.67211	4.50311	4.82482	4.68868	5.01683	5.45997	5.26881	6.04035
FBgn0264253	4.37491	8.79827	3.85738	5.15891	8.15637	4.42833	5.08535	9.60357	4.42714	5.98427	10.3504	5.36933	6.15323	9.77855	5.45999	10.6267	15.0576	10.2065	0.0259559
FBgn0037955	4.86194	4.61076	4.88465	7.35963	7.01452	7.32964	4.52449	4.54292	4.57766	4.50196	4.71953	4.43429	4.28895	4.34787	4.36167	4.40191	4.32862	4.46493	5.4527
FBgn0037958	1.51684	1.78117	1.74535	0	1.80553	1.56251	1.45809	1.90462	2.15241	2.39362	2.25839	2.53633	2.09408	2.355	2.2228	2.65052	2.45758	2.64947	3.6362
FBgn0259711	2.85323	3.56327	2.32472	2.09183	2.60446	2.5756	2.41308	2.70944	1.98453	1.72701	2.00706	1.85621	2.63277	2.5161	2.05754	1.8487	2.05472	1.58237	2.08748
FBgn0259716	1.16825	1.63461	1.47369	6.29392	6.26975	5.92052	1.39948	2.16024	1.78206	2.67012	3.00679	3.14276	2.23589	2.33363	2.38513	2.37418	2.21523	2.40485	1.3537
FBgn0259717	5.1578	4.67792	4.96578	4.43284	4.63076	5.51771	5.14997	5.21804	4.80151	5.16129	5.24009	4.86927	4.82778	4.61522	4.8206	4.72817	4.68255	4.59462	2.19365
FBgn0259714	0.201798	0.228725	0.684712	1.87513	2.45941	2.75617	0.815447	0.752986	1.18957	1.07141	1.04724	1.66572	2.15081	1.94165	2.51092	0.724392	0.486207	0.954127	0.45947
FBgn0259715	4.92208	5.64441	5.32593	11.8463	11.696	11.9742	5.33857	6.15777	5.78059	5.9935	6.73671	6.79145	7.30397	7.22571	7.50426	5.62332	5.78363	6.43445	6.20068
FBgn0039623	3.04856	2.94377	3.19251	1.65211	2.41981	1.89516	3.51755	3.13927	3.53281	3.7689	3.35191	3.52712	3.38166	3.34469	3.49108	3.69594	3.72241	3.69175	3.86563
FBgn0003302	3.1114	3.36841	2.95545	2.4772	2.27516	2.32847	2.32441	2.60491	2.3671	2.6653	2.78445	2.37894	2.70188	2.83094	2.7018	2.62212	2.77927	2.64769	3.46098
FBgn0039626	3.0683	2.9968	3.10956	2.07377	2.23537	1.672	3.39615	3.07069	3.32114	3.494	3.20143	3.38589	3.22383	3.22889	3.24496	3.2676	3.27881	3.07223	3.21801
FBgn0039627	2.5687	4.08718	2.44822	4.21971	4.20774	4.52533	2.31404	3.69847	2.26783	2.56597	2.77265	2.54057	2.81775	3.32196	2.50229	2.8833	2.5964	2.59729	3.60989
FBgn0039625	2.72042	3.55941	2.40748	1.93902	2.5956	3.05364	2.87959	3.20524	2.73151	2.7231	3.1492	3.26159	2.59294	2.11486	2.61019	1.62287	2.67529	2.23805	0
FBgn0262579	8.48555	7.44634	8.49508	2.60016	3.59946	2.68308	8.60991	7.46185	8.16681	7.00158	6.40183	6.88346	8.82336	8.06887	9.32765	7.14518	7.12326	6.54159	4.22359
FBgn0025678	5.46595	6.51317	5.17059	7.04264	8.64404	6.53112	5.06454	6.24606	5.08492	8.27702	8.74723	8.09313	5.88446	7.47544	6.11981	7.86186	8.94342	8.03456	7.00508
FBgn0050046	0.820435	0.597885	1.0827	4.26257	3.91782	4.03903	2.39088	2.21595	2.36751	3.84785	3.25522	3.79307	4.34603	3.98842	4.46728	5.45739	3.86464	4.50957	1.44416
FBgn0001145	8.55439	7.52981	8.89006	6.74043	7.45334	6.63601	8.35707	6.97535	8.31204	7.2034	6.87785	7.05498	7.58644	7.59275	7.70753	6.52909	6.40959	6.0495	4.93638
FBgn0032924	3.92077	4.11705	4.05919	3.73661	3.67724	3.6704	4.3439	4.06766	4.45418	4.75544	4.73552	4.60195	4.09177	4.05668	4.09357	4.5423	4.45839	4.50037	6.1437
FBgn0010504	2.73283	3.22772	3.16051	1.92869	2.0139	2.27309	2.6155	2.87159	2.99902	3.07293	3.11138	3.0116	3.10998	3.32189	3.40826	3.39109	3.78996	3.79732	5.00928
FBgn0044419	4.43706	4.48131	4.76164	3.47567	3.3059	3.90596	5.28959	5.59298	6.12061	3.58062	3.43014	3.29251	4.24331	4.11231	4.20953	3.00174	3.06967	3.12271	4.57577
FBgn0016641	3.86622	3.85978	4.11694	2.08638	3.16459	2.67509	4.0704	3.63826	4.24802	3.89119	3.48227	3.76887	3.83842	4.10337	4.04916	3.97163	3.81247	3.82745	4.41567
FBgn0034498	2.41484	2.60118	2.62484	1.17411	0.978631	0.552049	2.9805	2.41702	3.06872	3.09714	3.10523	2.9659	2.49614	3.0297	2.67702	2.94632	2.9421	2.75382	4.11776
FBgn0262510	2.91205	3.25841	2.48612	4.32003	4.68214	4.11117	2.61495	3.32274	2.37078	4.52737	4.42346	4.00877	2.9477	3.83522	2.80085	4.07929	4.88533	4.24922	3.75008
FBgn0263260	4.3369	5.39305	4.17705	5.3861	6.73805	5.74542	4.80012	5.81891	4.47627	7.34049	7.50697	6.84325	5.35544	6.06547	5.51798	8.11242	8.25901	8.45614	4.72767
FBgn0029969	5.3917	5.75624	5.26284	9.44989	9.12528	9.327	4.78861	5.5227	5.07957	4.57365	5.29179	4.91634	4.79013	5.08892	4.91596	5.35652	5.53172	5.71062	6.97708
FBgn0262945	0.64323	1.59766	0.261443	3.47775	2.24594	1.64933	0.350367	0.666246	0.0983181	1.30594	2.0283	1.14466	0.406683	0.683382	0.121467	0.681625	0.457573	0.16148	2.0415
FBgn0027528	3.48502	2.35583	3.72394	3.23772	4.43936	4.69258	3.09772	2.30159	3.27564	3.55377	3.12238	3.65883	3.26842	2.9895	3.61272	3.27714	2.69443	3.32248	3.00147
FBgn0027529	4.6415	4.2799	4.90011	2.6789	3.81649	2.776	5.56558	4.50409	5.45774	5.61638	5.22843	5.60048	4.79049	5.12507	5.02375	5.30526	5.1209	5.10219	4.54973
FBgn0027526	3.02389	2.90249	3.03089	2.20626	2.82499	2.42908	3.16138	3.35772	3.55075	4.14066	4.21353	3.92679	3.63698	3.28408	3.2929	4.11152	4.0894	4.07632	4.58589
FBgn0027524	4.33031	4.6826	4.05481	5.10732	4.8238	4.61768	3.79127	4.17153	3.66914	3.96093	4.25611	3.90238	3.79394	3.86016	3.69101	4.0274	4.19149	3.92778	4.86291
FBgn0027525	5.98443	5.84707	6.40059	5.49534	6.21488	5.72341	6.33203	5.95832	6.46333	6.72715	6.58875	7.00269	5.8851	5.68601	6.29783	6.30865	5.41153	6.09824	4.69102
FBgn0034379	2.70245	2.27536	2.76314	0.746802	1.394	0.830898	2.69585	2.33174	2.50556	1.98465	2.24725	2.17363	2.39699	2.21498	2.27638	2.20351	2.08178	2.01282	1.56656
FBgn0266083	1.73143	1.87463	2.17529	0.256309	1.51201	0.302179	2.694	2.11411	2.5833	2.91857	2.61058	2.97959	2.41193	2.52911	2.42173	2.31007	2.30426	2.00546	3.40314
FBgn0266084	5.37809	5.10119	5.53809	0.888778	0.72435	1.12046	7.53602	6.71946	7.26581	5.40952	4.87319	5.34763	5.23777	5.3133	5.52504	5.86242	5.22925	6.1727	4.64478
FBgn0034372	1.25532	1.7044	1.05756	0.0811299	0.346226	1.04846	1.40527	1.51241	0.624907	0.737103	2.41144	0.88104	1.21006	1.1744	1.28016	0.904635	1.3717	1.30101	0.619375
FBgn0034371	5.12652	5.14222	5.13026	5.00567	4.79557	4.92585	4.42723	4.5559	4.23545	4.35126	4.39593	4.3526	4.59387	4.32282	4.52438	4.19207	4.20265	4.32616	4.98592
FBgn0037489	2.64959	3.67792	2.59835	2.59519	3.52826	2.68083	3.07215	3.95896	3.13949	3.32483	3.41657	3.55231	3.08487	3.56265	3.14485	3.72972	3.38849	3.25609	3.59583
FBgn0037578	2.44164	2.39091	2.52421	0.943639	1.70881	2.05473	2.56062	2.58345	2.85826	2.56792	2.56364	2.58949	2.65633	2.50824	2.58182	2.54004	2.49235	2.60155	3.87963
FBgn0030704	3.47163	3.30636	3.59135	2.90298	3.12754	3.70025	3.70404	3.96255	3.61674	3.26224	3.20338	3.03184	3.58577	3.52298	3.42627	3.17071	2.99858	2.85053	2.38369
FBgn0030257	6.47559	6.00179	5.74659	0.452023	0.275882	0.364754	4.09508	3.91017	3.80156	2.05367	1.80522	1.47148	5.11818	4.56285	4.4454	1.64777	0.932723	1.25164	1.7188
FBgn0030703	8.31197	7.51377	8.15399	8.16794	7.78593	8.43815	8.61639	8.42965	8.16878	7.90902	7.52739	7.84848	8.14495	7.78102	7.98667	7.69822	7.47377	7.41763	5.50358
FBgn0030700	1.99216	1.95723	1.88271	1.90927	2.01533	2.10058	1.8886	1.84547	1.95948	1.62532	1.62609	1.34888	1.69667	1.6556	1.56861	1.59045	1.6774	1.63329	2.33584
FBgn0030701	3.53666	3.18217	3.59332	2.34351	3.1873	2.69914	4.03	3.62102	4.1806	3.87494	3.64353	3.92319	3.79213	3.66093	3.79875	3.87607	4.01396	3.95596	4.33253
FBgn0033471	3.75062	4.77324	3.38417	5.51833	5.36049	5.29749	3.20208	3.98404	3.15052	2.70847	3.14834	2.66703	3.31054	3.52406	2.86978	3.4661	3.50121	3.25431	5.62543
FBgn0085256	8.0031	7.41025	6.64832	1.94964	1.34992	0.710628	5.8223	4.59362	3.79306	6.17424	6.15124	5.37247	5.68193	4.96208	4.3166	5.83593	4.86757	4.98521	1.59842
FBgn0036152	4.13834	3.09584	4.23614	3.23239	3.68487	3.74072	4.43019	3.38717	4.36268	4.97132	4.32748	4.88681	4.15161	3.7966	4.4106	4.26535	4.39226	4.22204	3.49836
FBgn0036155	1.85547	1.05048	1.98495	0.938409	1.71612	1.53554	2.88258	2.01716	2.73886	2.04918	2.10672	2.18031	2.44106	2.23682	2.50586	1.79487	1.84149	1.62779	2.57542
FBgn0036157	1.48483	1.90244	1.58087	6.78826	6.75053	6.50717	1.38772	2.53961	1.78761	2.21909	3.01381	2.80093	3.22804	3.14288	3.76462	1.94001	2.0338	2.25267	1.35365
FBgn0033476	6.50336	6.24727	6.67583	5.97576	6.71827	5.47524	7.49639	6.68187	7.42366	5.9173	5.76711	6.16187	6.00345	6.03915	6.09221	5.78138	5.11696	5.19434	5.91813
FBgn0036629	1.59824	1.59893	1.62783	1.04898	1.36265	1.35663	1.35795	1.46571	1.60553	1.22915	1.28992	1.32684	1.26094	1.399	1.46301	1.23756	1.13558	1.45701	1.69518
FBgn0015040	5.13654	4.68955	5.4226	3.58633	3.82803	4.58996	4.11278	3.97375	4.30082	4.47662	4.78887	5.16094	5.84357	5.62019	6.16917	6.08256	5.37963	5.91793	1.96329
FBgn0040717	5.62391	4.94189	5.5965	0	0.869994	0.571924	2.96713	3.07628	3.00521	3.05665	2.82681	2.379	3.11402	2.99609	3.273	1.437	1.44702	1.19363	0.332259
FBgn0015513	4.04904	3.66547	4.38477	3.86381	4.21343	2.99005	5.92501	4.6014	5.7844	5.64133	5.11065	5.58205	5.43441	5.24469	5.77274	5.7006	5.05558	4.88176	3.04779
FBgn0038286	4.46568	3.80013	4.53504	3.64644	3.75843	3.83551	4.41936	3.69658	4.32953	5.41111	4.91313	5.43404	4.0624	3.79524	4.19962	4.10095	4.08366	4.49751	6.31852
FBgn0026433	2.39185	2.3635	2.67977	2.1059	2.41515	2.08789	2.74915	2.3592	3.09576	2.9363	2.94527	2.79113	2.53451	2.64792	2.56426	3.16885	3.19029	3.12976	6.03026
FBgn0026432	1.26884	1.08331	1.34949	0	0.626482	0.301458	1.60875	1.17983	1.81346	1.04732	0.968471	1.12057	1.94099	1.89657	1.68863	1.15406	1.12563	1.0512	2.13705
FBgn0026431	2.10859	1.79658	2.27211	0	0.952105	0.476346	2.67773	2.34118	2.59494	2.40168	2.34842	2.39568	2.86046	2.5087	2.7693	1.94568	1.77777	1.42288	1.79735
FBgn0026430	3.04763	3.46322	3.18945	1.22788	1.93585	1.4199	3.59449	3.46805	4.0183	2.94782	3.00157	2.8281	3.8353	3.66526	3.64112	3.56163	3.26071	3.4013	6.27651
FBgn0262582	3.02466	3.02598	2.88028	2.97482	2.77865	2.10834	4.69354	2.49303	4.05732	4.19564	3.3661	3.65653	3.64062	3.64106	3.69436	4.07628	3.12544	3.22003	4.56563
FBgn0013263	5.32241	4.93815	5.51936	4.13037	5.29138	4.4618	5.7939	5.3807	5.67042	5.93943	5.6584	5.94279	5.19633	5.36067	5.4426	5.78795	6.14049	5.84594	4.94392
FBgn0013269	3.72023	4.85294	3.43093	4.72008	5.36542	5.01489	3.94445	5.02209	4.30249	4.35177	4.60568	4.536	4.20102	4.57003	3.93821	4.78611	4.3865	4.73583	7.0186
FBgn0264815	6.74862	6.92315	6.95928	1.72264	1.87544	2.3284	3.83223	3.8915	4.19504	2.05184	2.37817	2.07138	4.73937	4.59124	4.78661	2.63225	2.75759	2.78796	1.90284
FBgn0264817	2.33985	1.75272	2.39007	1.30964	0.713277	1.36379	2.1223	2.33781	1.80594	2.35456	1.58313	1.91841	3.16748	3.17434	3.01047	2.63839	2.49981	3.24419	2.70545
FBgn0021800	2.29331	1.85304	1.97217	1.66265	1.47387	0.925169	3.63384	1.39169	1.84875	1.80661	1.55419	1.56095	2.36307	2.3263	2.27595	2.78931	2.49781	1.27203	3.2328
FBgn0051414	0.727391	1.19311	1.14508	4.90962	5.63644	5.96112	1.03403	1.96538	1.69279	2.09108	2.91931	3.18016	1.58296	2.04331	2.35786	2.12795	2.04055	2.78215	1.68029
FBgn0267351	2.3798	2.33218	2.71072	1.15479	2.46516	1.92457	2.91118	2.30275	2.82466	2.78316	2.7196	2.63031	2.71792	2.80928	2.67732	2.66928	2.50205	2.62758	4.30435
FBgn0267350	6.20234	6.09111	6.54983	4.19987	4.34827	4.46455	6.00688	5.48468	6.3404	6.11907	6.20155	6.01049	5.84161	6.12791	6.15277	6.18698	6.40915	6.29201	6.72782
FBgn0030870	4.64863	4.87313	4.76086	0.696192	0.825226	1.19103	4.8814	5.03463	5.1461	6.16107	5.95572	6.35368	4.47832	4.42292	4.64786	6.141	6.01105	6.24641	5.36413
FBgn0030871	1.41075	1.68643	1.33154	2.04896	2.21258	2.48333	1.62631	1.82338	2.10693	1.28325	1.81157	1.4418	2.21626	1.73373	1.53357	1.72881	1.93516	1.71817	5.42728
FBgn0030872	3.90389	3.57266	4.00033	4.62047	4.61515	5.10734	3.6151	3.29357	3.84917	3.66376	3.75954	3.74873	3.44467	3.54056	3.72791	3.91969	3.86173	4.11031	5.0736
FBgn0030873	4.50485	4.78077	4.47947	4.4248	4.53128	4.64323	4.57963	4.59615	4.55623	5.30039	5.33143	5.06344	4.59052	4.83176	4.6015	5.28875	5.46431	5.35721	5.63659
FBgn0030874	1.60836	1.68431	1.52968	2.1059	1.84986	1.97959	1.59607	1.64235	1.67843	2.04942	2.09097	1.88242	1.64557	1.8077	1.67991	2.20989	2.28948	2.33063	3.70408
FBgn0037396	2.43378	3.21324	1.99014	9.44568	9.1107	8.7902	2.28962	3.38812	2.24069	3.46391	4.21962	3.50772	3.36529	3.78795	3.05896	3.18622	3.4284	3.197	2.58916
FBgn0030877	3.41651	3.76204	3.2072	4.58352	4.2067	4.33057	2.92474	3.09982	3.15392	3.41546	3.71032	3.536	3.22209	3.1057	2.93463	3.86891	3.80663	3.70636	6.1026
FBgn0038854	2.89238	2.97617	3.25924	2.98325	3.47612	3.18071	2.92375	2.76222	3.25846	3.55695	3.43425	3.41547	3.01342	3.00624	3.11055	3.53134	3.53713	3.50922	3.69631
FBgn0050098	0.187846	0.265756	0.170203	3.10077	2.88439	3.04316	0.740598	0.884827	0.281151	0.621038	0.788656	0.666126	2.29828	2.16366	1.85304	0.676095	0.322093	0.318916	0
FBgn0050094	2.84272	2.95238	2.47543	3.29324	2.85409	3.26495	2.54217	2.71057	2.39191	2.20839	2.13136	1.81578	2.46601	2.32773	2.11441	2.2603	2.55227	2.1875	2.91432
FBgn0050096	1.52081	1.32365	1.57303	1.5463	1.123	1.62403	1.84464	1.79471	1.80978	1.77107	1.73898	1.32644	1.65927	1.37175	1.46977	1.6837	1.69788	1.47222	1.44855
FBgn0050090	1.05611	1.11847	0.715074	7.0471	6.37003	6.48171	0.81086	1.34321	0.796443	1.25083	1.7401	1.58728	1.90161	1.85257	1.77935	1.25847	1.30183	1.35897	1.48326
FBgn0038855	4.10262	4.12589	4.31201	3.56469	3.5889	3.53483	3.64245	3.73044	3.80364	4.18882	4.17705	4.05203	3.7033	3.94222	3.82134	3.96164	4.22601	4.21094	5.07908
FBgn0032700	3.59358	3.48334	3.51548	3.69724	3.58275	4.14354	3.83398	3.61305	3.57652	3.65347	3.74764	3.62179	3.3282	3.58444	3.36616	4.00168	4.17528	4.25098	3.45466
FBgn0032701	3.23935	4.16797	3.48496	2.79121	4.01297	3.65357	4.01197	4.32595	3.98591	3.5245	3.83597	3.75122	3.45995	4.16452	3.59288	4.31996	4.1211	4.23706	3.44766
FBgn0286071	4.14379	3.69549	4.08148	2.19685	3.49199	3.23828	4.22684	4.18135	4.2231	2.28403	2.41848	2.45693	4.25236	4.06907	4.0657	2.02611	2.35505	1.92863	2.02644
FBgn0032703	3.71116	3.88559	3.49128	3.67727	4.27104	4.72853	3.80785	4.16641	3.59489	4.11195	4.11444	3.79727	3.84614	4.02454	3.7056	3.8147	4.00778	3.78172	3.61782
FBgn0023526	1.97362	1.70818	1.8467	0.696192	0.613381	0.333273	3.25943	1.42526	1.93554	2.15249	1.18362	1.21403	1.5082	1.64601	1.48199	1.78493	1.1905	1.3042	2.21309
FBgn0023527	3.71454	5.16185	3.4588	5.79843	5.8671	5.92016	3.27754	4.68819	3.51371	3.52843	3.96623	3.46697	3.62504	4.2147	3.29253	3.97817	4.10252	3.87842	6.52289
FBgn0265856	4.24714	3.34144	4.4224	0.175828	0	0.243535	0.959208	0.77734	1.67722	0.724119	0.416391	0.623505	0.957288	0.610826	0.9705	1.27875	0.692607	0.865738	0.0367694
FBgn0038872	3.11901	2.79923	3.43142	1.08256	2.60335	1.80068	3.92678	3.34923	3.96812	4.13181	3.85587	4.09971	3.5643	3.59505	3.79549	4.00575	4.17716	4.02849	4.89807
FBgn0038405	0.87242	0.144617	0.950426	0	0	0	0.238533	0.0918031	0.265891	3.60357	3.7302	3.06916	0.256101	0.0625761	0.25798	0.283295	0.212384	0.19048	0
FBgn0066084	12.6642	12.6682	11.2352	15.4702	15.0616	14.6618	11.604	11.4481	10.4068	12.2627	12.247	11.7905	11.5052	11.0257	10.6508	11.8562	11.9594	11.8382	10.7784
FBgn0050476	3.25507	3.31691	3.00576	3.72446	2.8189	3.30096	2.71532	2.82271	2.45922	2.18533	1.96553	1.69723	3.0176	2.60814	2.35323	2.31227	2.54788	2.3102	2.41975
FBgn0038877	7.22216	6.78855	7.55869	3.86312	5.0217	4.76307	6.95421	6.28315	6.94675	6.23663	5.90603	6.24817	6.60022	6.47181	6.64884	6.35346	6.39981	6.31708	3.73793
FBgn0038878	1.72647	1.61799	1.47918	5.20675	4.99399	5.20983	0.770763	1.47907	1.24595	1.76322	1.83379	1.8878	1.374	1.58511	1.91598	1.23263	1.05144	1.75216	2.43035
FBgn0001269	4.19734	3.73464	4.50239	0	0	0.192749	2.54136	2.25893	2.79719	0.738408	0.631981	0.589392	1.41487	1.8938	1.88957	0.275487	0.112496	0.313926	0.22184
FBgn0032603	2.9213	3.29463	3.54608	4.28843	4.34355	5.34554	2.00001	2.32942	2.46411	2.56884	2.65853	3.16834	3.34608	3.25736	3.67361	2.21713	2.09435	2.61229	1.55625
FBgn0050418	2.06841	1.93957	2.10456	0	0	0.0749816	2.61801	1.95239	2.00601	0.384955	0.304008	0.0751272	1.63216	1.42886	1.15373	0.318269	0.603055	0.39855	0.996467
FBgn0085224	3.17809	3.47994	2.82595	3.52785	3.12788	3.19091	2.85806	3.26603	2.54531	2.78239	2.92644	2.63176	3.05644	3.08023	2.70001	2.60695	2.97282	2.62022	3.87698
FBgn0052344	2.68892	3.92385	2.78506	3.70881	4.18116	3.6446	3.26512	3.79344	3.46588	3.6211	3.65335	3.5769	3.36914	3.85333	3.17055	4.15182	3.8555	4.03846	4.77169
FBgn0263121	5.19595	5.11175	4.79009	6.47627	5.6637	5.66059	4.54947	4.5023	4.21962	4.81097	4.98785	4.6589	4.68664	4.5575	4.50912	4.77282	4.85357	4.72335	5.55296
FBgn0052803	3.59661	3.42949	3.28461	3.84769	3.46558	3.81042	3.14802	3.1558	3.12461	3.35239	3.58291	3.44854	3.40724	3.17317	3.41911	3.04734	2.97466	3.13497	3.92285
FBgn0261990	7.0387	7.98352	7.28998	2.63169	2.69952	2.97293	7.16773	8.87906	6.81932	4.92505	5.36875	4.60008	6.70383	8.03607	6.25531	6.53866	6.91338	6.50982	1.90312
FBgn0261995	5.00148	5.10853	5.12204	6.33291	6.11476	6.30363	4.97603	4.75166	4.95306	4.97843	5.11581	4.88108	4.79368	4.81986	4.95137	4.81653	4.80746	4.91218	4.1946
FBgn0260463	5.53275	5.38723	5.58122	5.23877	6.17621	5.34293	6.29618	5.48059	6.20727	7.38797	7.26526	7.15346	5.54689	5.75048	5.72652	7.09246	7.39014	7.48405	4.56025
FBgn0263832	4.32632	3.90481	4.51917	2.86636	3.61402	3.22124	4.6879	4.04031	4.65467	4.88022	4.61708	4.81357	4.56468	4.26789	4.62562	4.65903	4.5173	4.51722	5.30599
FBgn0033731	6.94586	5.71885	7.34289	0	0.0946517	0.296678	5.28293	3.99728	5.02562	1.23131	1.47195	1.30512	8.25672	7.35268	8.71333	1.53998	0.168139	0.180541	0
FBgn0024273	3.26618	3.1345	3.35806	1.30151	2.36054	1.74273	3.72447	3.26615	3.59398	3.75109	3.36533	3.91871	3.26232	3.33047	3.42935	4.36894	3.94505	4.39103	4.02301
FBgn0024277	4.93648	4.83513	4.94606	2.34017	2.35886	1.64117	5.66361	5.18389	5.22947	4.73825	4.63101	4.83186	4.88404	4.74896	4.94079	4.85837	4.78592	5.01967	4.21988
FBgn0263046	1.86259	1.35155	1.3523	0.938409	0.639474	1.07881	2.79486	2.70007	2.37875	1.05363	0.933033	1.01149	1.29015	1.27207	1.27265	0.562665	0.527481	0.453667	0.878734
FBgn0263048	1.06625	0.658974	1.11303	0	0.443232	0.211043	1.8593	1.02639	1.67773	1.55459	1.21736	1.46433	1.32629	1.20592	1.4095	1.37376	0.829151	0.940173	0.64913
FBgn0033367	2.92196	2.96674	3.58564	0.490491	1.13003	2.24347	3.77492	3.46846	4.19185	3.78145	3.69884	4.01596	7.70735	7.72591	7.58263	2.77389	2.39335	3.10792	3.15521
FBgn0267164	2.87951	3.44401	2.7079	5.67405	5.46053	4.76341	3.92023	4.45547	5.05838	2.86954	2.43906	1.78578	2.40119	2.02813	2.38727	2.35413	2.32996	2.16975	2.86488
FBgn0260224	3.09222	3.56646	3.09259	2.57458	3.1632	2.97471	3.23101	3.31854	3.17359	2.85322	3.24476	2.99169	3.06682	3.21562	2.95096	3.12124	3.25605	3.03107	3.97725
FBgn0260222	4.27781	4.42735	4.31668	4.03714	4.03514	4.07863	3.96903	3.95333	3.96862	3.21562	3.4409	2.91005	3.85206	3.87477	3.90844	3.40218	3.51365	3.423	4.3982
FBgn0260223	6.1169	6.07542	6.00981	6.67601	6.55229	6.4961	6.09587	6.34683	5.99263	5.35346	5.60689	5.31679	5.95732	5.96112	5.99222	5.59497	5.46548	5.31883	4.9398
FBgn0033616	2.44443	2.3903	2.57886	0.848575	1.93157	2.0472	2.53041	2.62128	2.64947	3.2676	3.05433	3.15373	2.75878	2.67546	2.68705	3.22403	3.3513	3.39377	3.71664
FBgn0260228	4.93028	5.23934	4.09064	1.29743	1.36078	2.34225	3.64803	1.37583	4.20232	2.79772	1.82368	2.79358	2.34853	1.92394	2.49761	1.36064	1.17645	2.4004	4.37186
FBgn0260229	4.11278	4.12053	3.59877	3.5036	3.91826	4.22289	3.68761	4.40354	3.8607	4.02397	4.33905	3.97172	3.65473	3.93377	3.79568	4.11266	4.2079	4.09749	3.13725
FBgn0261574	1.40441	1.71717	1.34093	0.300282	0.239789	0.191891	3.41202	1.82798	2.24357	7.52286	6.11027	6.83475	1.81539	1.74039	1.48673	1.88181	1.46344	1.20157	1.7144
FBgn0261570	4.90254	4.40706	5.32388	1.91727	2.97902	2.94466	5.16039	4.27271	5.1592	5.35259	5.01626	5.2579	4.41995	4.34097	4.75683	5.05864	5.18362	5.00507	4.87198
FBgn0261573	3.42743	3.75186	3.78419	2.45425	3.57873	3.01737	4.1074	3.87836	4.18877	4.49299	4.50306	4.48451	4.03391	4.07572	4.16954	4.24053	4.60833	4.55483	6.70505
FBgn0030816	4.8395	4.77814	4.84944	0	0.134512	0	4.8397	5.08636	4.64952	1.27524	2.10923	1.32459	2.45354	1.96364	2.57094	2.21538	2.01156	1.7587	2.84351
FBgn0038919	3.43619	3.18247	3.77455	0	0	0	1.23589	0.954848	1.51571	0.788171	0.635049	0.779015	0.487935	0.343242	0.717351	1.43082	1.07257	1.3097	0.230251
FBgn0037661	0.732209	0.542309	0.641611	0.917297	0.958042	0.567914	1.49101	1.1084	1.36338	1.11282	1.05835	0.930593	1.07315	0.941753	0.795528	1.70845	1.8992	1.83044	1.51543
FBgn0035160	1.71707	1.52316	1.64045	4.52714	4.13339	4.48731	1.58504	1.83886	1.71503	1.69707	1.88368	1.64128	2.98117	2.54805	2.95107	1.34185	1.19171	1.2513	4.90522
FBgn0035162	2.95962	4.15655	3.97124	3.46093	4.25782	4.08544	4.11578	4.28436	5.04156	5.29691	5.10849	5.94138	4.57569	5.09664	4.3063	6.66741	6.09435	6.15869	5.22341
FBgn0035165	6.97583	7.1928	6.71358	6.32022	6.77193	6.46097	6.57079	6.79576	6.147	7.22474	7.11049	6.96532	6.87055	7.4522	6.81579	6.80906	7.14372	6.87202	5.72896
FBgn0035164	2.79007	3.45074	2.4947	3.30212	3.46263	3.05901	2.41171	2.93669	2.23722	1.89356	2.2979	1.7428	2.66261	2.98854	2.27169	2.46238	2.49063	2.2515	4.01835
FBgn0035166	3.18637	3.48677	3.14663	3.30408	3.45809	3.42221	3.19753	3.29735	3.13684	3.14081	3.34329	3.18641	3.09655	3.33562	3.14264	3.25636	3.4888	3.34501	4.16547
FBgn0263594	8.89625	8.95524	8.81021	8.76361	9.00295	8.46825	8.66643	8.74146	8.59723	7.75869	7.73617	8.16526	8.14137	8.17427	8.24437	7.7945	7.67151	7.82795	9.37384
FBgn0020386	5.3126	5.29082	5.34033	4.1049	4.26097	3.85468	5.47037	4.98096	5.1202	5.51218	5.05022	4.63574	5.40486	5.74785	5.35243	5.28932	4.85485	4.98546	6.20597
FBgn0020385	5.05141	5.58332	5.56283	11.4404	11.0446	11.7446	4.91541	5.97025	5.9025	6.07484	6.70873	7.34986	5.9841	6.28703	6.75408	5.85828	6.017	7.15217	6.87066
FBgn0020389	3.59089	4.04413	3.60733	7.24904	6.96712	7.03456	4.08474	4.40107	4.22978	3.94095	4.8345	4.30662	4.06422	4.65783	4.34545	6.47368	7.87601	7.4928	4.74414
FBgn0020388	4.86924	4.92188	4.92458	5.55605	5.5826	5.65827	4.71807	4.31806	4.74946	4.64163	4.71497	4.56663	4.4511	4.47571	4.48114	5.00588	5.15224	5.05804	6.30476
FBgn0263599	3.77818	3.89157	4.09588	2.77956	3.56276	2.45579	4.42871	4.06929	4.64402	4.84858	4.65844	4.90339	4.43278	4.51328	4.59226	5.03588	4.86914	4.81477	5.12611
FBgn0263598	10.4806	9.56786	10.7338	5.40919	6.1348	6.02413	10.8748	9.95374	10.8314	8.54156	8.16052	8.50344	9.67773	9.47823	9.87618	8.58319	8.37266	8.70577	6.97094
FBgn0034452	1.71904	1.56478	1.41443	0	0	0	0.905699	0.637355	0.830856	1.07282	1.09893	1.19064	2.38851	2.58501	2.02455	0.865383	0.967288	0.81951	3.80614
FBgn0087011	2.9798	1.80343	2.6595	0	0	0	1.9153	0.465026	1.52536	0.679455	0.380735	0.263901	3.89052	3.21138	3.84979	2.52805	0.810781	1.04243	0
FBgn0087013	7.19504	7.27376	7.52069	7.74012	8.67711	8.68791	7.76739	7.29196	7.79397	7.58641	7.4274	7.79503	7.1165	7.13794	7.31052	7.78051	7.55141	7.84362	8.01452
FBgn0031936	5.73756	6.49091	6.05466	5.19703	6.27893	6.93966	3.1013	4.19116	3.44467	3.28362	3.74029	3.88128	3.11297	3.88244	3.42371	3.06075	3.04772	3.56023	1.41789
FBgn0034417	3.01239	3.15394	3.10132	4.39293	3.80673	3.88402	2.3317	2.35144	2.31254	2.36452	2.98028	2.89682	2.87895	2.96757	2.78334	4.31877	3.86785	4.11488	2.73851
FBgn0031390	3.33898	3.15372	3.65841	2.07212	3.12589	1.98499	3.95751	3.46978	4.08426	4.30391	3.95507	4.29537	3.78039	3.86716	4.03866	4.24512	4.1992	4.13087	4.789
FBgn0031935	4.50732	3.84036	4.61943	2.72755	3.51665	4.91105	1.34812	1.80641	1.87473	2.26455	2.17954	2.41143	2.04168	1.81176	2.16999	1.57501	1.11879	1.84095	1.15498
FBgn0034145	2.62276	2.71631	2.66272	1.06827	0.956563	0.672626	1.17416	1.24282	1.48741	1.76198	1.32154	1.3502	1.57854	1.56179	1.47764	0.950739	0.641857	0.671294	1.88133
FBgn0031428	2.87731	2.91863	2.97221	7.8395	7.31481	7.9605	2.47711	2.94096	2.79944	2.90178	3.31538	3.57992	3.25511	3.13202	3.5749	2.95975	3.17099	3.59921	3.10165
FBgn0031398	1.83172	1.75558	1.52013	2.16516	1.9518	2.18742	1.62076	1.86254	1.96246	1.57472	1.79965	1.5907	1.90153	1.56556	1.08091	1.59799	1.68062	1.54442	4.88485
FBgn0031399	2.84786	2.33281	3.15648	3.73331	4.12769	4.1218	3.51544	2.71256	3.37857	3.86139	3.67887	3.71046	3.01319	2.91541	3.14054	4.0069	3.86224	4.00367	4.01602
FBgn0034418	4.78098	4.75309	4.93362	5.01229	5.06535	5.43081	4.77087	4.58102	4.88388	4.92333	5.04914	5.03916	4.61718	4.96747	4.92135	5.44736	5.62639	5.64107	5.18298
FBgn0034419	4.92122	5.47918	4.8797	5.39883	5.09604	5.4715	4.80534	4.91111	4.84801	4.82392	5.11746	4.803	4.75391	5.23238	4.934	4.91894	5.51812	5.20272	4.48162
FBgn0038704	3.97915	3.54181	4.18102	2.93435	3.68271	2.35224	4.84299	4.15337	4.57802	4.54302	4.16628	4.59134	4.24372	4.35877	4.53179	4.10148	3.92342	3.66534	2.5057
FBgn0043535	12.9219	11.8738	12.6092	5.40212	3.90477	5.15929	8.16169	8.35243	8.73232	7.19073	6.3279	6.5819	7.98567	6.63289	7.93751	8.44873	7.64376	7.97656	1.77283
FBgn0043534	6.90918	6.46841	6.44378	0.842988	0.275882	0.704002	1.99408	1.89136	2.41633	1.77942	1.63627	1.55816	2.21808	1.77443	2.21413	1.80564	1.23526	1.2928	0.492673
FBgn0034455	3.51437	3.75907	3.24813	3.90277	3.68361	3.42743	5.77319	5.45054	5.566	2.88786	3.27411	2.73268	3.40091	3.28128	3.03996	3.09135	3.22089	2.93737	5.63728
FBgn0038708	0.178036	0.305622	0.302783	0	0.063786	0.124622	0.556817	0.320704	0.652893	2.31021	1.77395	2.16173	0.0592252	0.164107	0.115347	1.02151	0.680326	0.994495	0.0299657
FBgn0260482	4.60354	3.87053	3.74424	0	0	0	3.65554	3.1074	2.85089	1.3055	0.934416	0.774256	5.10079	4.09214	4.8061	1.78573	0.617899	0.933331	0.50019
FBgn0260486	4.15511	3.4316	4.31207	0.300282	0.384203	0.260269	5.29404	3.60036	5.19322	3.64038	2.73932	3.69255	5.13403	4.95728	5.43026	3.02489	2.05384	1.97174	1.39337
FBgn0260484	3.90156	3.81726	3.77613	4.5542	4.4647	3.99358	4.18933	4.28307	4.0983	3.99672	3.64036	3.82698	4.20659	3.92798	3.99859	3.79014	3.59866	3.5535	4.30659
FBgn0028970	4.36136	4.83313	4.06286	5.35679	5.09122	4.76059	3.81321	4.06006	3.70536	3.59258	3.8143	3.41077	3.65486	4.00206	3.65072	3.86904	4.19188	3.90251	3.36685
FBgn0019968	4.76307	4.25222	5.21489	2.63976	3.22348	2.38352	5.29847	4.1644	5.15135	4.99491	4.52369	4.83959	5.19725	5.19942	5.4656	5.09657	5.16135	4.70477	3.34702
FBgn0000566	4.60469	5.29249	4.43089	5.78164	6.18146	5.64895	4.67615	5.2388	4.73405	6.74975	7.24292	6.44952	4.696	5.03294	4.73909	6.35599	5.97102	6.4874	6.06605
FBgn0010825	4.46066	3.87282	4.82502	2.71748	2.91282	1.94565	6.12473	4.01025	5.59201	4.92515	4.04954	4.69741	5.0189	5.11528	5.22934	4.84291	4.08151	4.46791	5.56482
FBgn0031645	7.09663	6.88213	7.12444	5.07953	7.31622	5.81482	4.61457	5.06042	4.79681	4.98744	5.04229	4.49567	4.58552	5.02856	4.5857	6.35107	5.9272	5.85454	3.95011
FBgn0031640	3.98564	3.98633	4.00419	3.68768	3.78623	3.7478	3.91842	3.90966	4.13096	3.46689	3.74404	3.46636	3.68862	3.82864	3.77194	3.75485	3.91471	3.73704	4.51756
FBgn0010770	2.46964	3.74242	2.5303	3.38914	3.94877	3.35822	2.78355	3.65727	2.79269	2.56968	2.91605	2.73613	3.01414	3.36493	2.76916	3.16095	2.75236	2.88964	4.98444
FBgn0010772	4.09721	3.48423	4.53476	2.36438	3.6833	3.21357	4.98787	4.03555	4.88934	5.48734	4.98702	5.30432	4.45783	4.26024	4.6391	4.91028	4.83661	5.07089	3.54508
FBgn0031649	2.4901	2.24318	3.37284	0	0	0	1.21395	0	1.08312	0.628741	0.364285	0.440513	2.19426	2.1574	2.66592	0.655352	0.0640406	0.786818	0.622739
FBgn0262887	1.28978	1.12413	1.46196	1.02791	1.3589	1.65944	1.51757	1.29354	1.45828	2.16303	2.33279	2.16029	2.31445	2.00876	2.54254	1.89061	2.13364	2.09869	0.667747
FBgn0262881	3.14214	5.32479	1.88425	7.63328	8.63217	6.12541	3.61983	4.92605	3.11081	2.99081	4.04058	2.65708	6.30039	6.92459	5.70075	2.78279	3.2098	1.86395	1.33468
FBgn0085736	8.58219	8.61101	7.83963	9.96961	9.21774	9.18892	7.31932	7.41432	6.67219	6.63577	6.53602	6.13462	7.50948	7.09566	6.85699	6.5793	6.5135	6.2266	6.38836
FBgn0028700	1.83043	2.40017	1.75014	2.49457	2.86241	2.35007	1.82099	2.36055	2.53478	1.59613	2.25536	1.64628	2.4116	2.05648	1.70412	2.0878	2.13483	1.84986	5.82109
FBgn0259726	4.71877	4.43394	5.02368	2.5073	4.17013	3.59184	4.81444	4.49931	4.9973	4.15059	4.14324	4.06228	4.11853	4.38963	4.61472	4.07611	4.11169	4.00441	4.27722
FBgn0038745	5.91056	4.87501	6.10624	6.40432	6.50279	7.01633	6.29892	5.31752	6.12498	6.07762	5.61113	6.13016	5.62361	5.20037	5.7027	6.39955	6.24802	6.52698	5.67012
FBgn0261680	1.7263	1.68255	1.86582	0.837379	1.44596	0.755647	1.94745	1.83062	2.07345	2.1586	2.0755	1.92643	2.16942	2.04513	1.91163	1.96514	1.88241	1.87296	3.5091
FBgn0051777	2.94739	3.65896	2.76005	8.30453	8.25843	8.08634	3.45293	4.08244	3.337	7.23635	7.0491	6.37833	5.01119	5.28113	4.69162	7.26691	6.81359	6.81212	1.94705
FBgn0038400	8.55125	8.53498	8.325	9.37294	8.8598	9.15419	7.63894	7.84776	7.4929	6.35399	6.64274	6.19774	7.30264	7.07013	7.15646	6.65825	6.67577	6.56092	7.38783
FBgn0034802	6.66668	6.45268	6.53964	5.03977	6.43397	5.14046	7.81364	7.39879	7.48048	8.03244	7.26433	7.47773	7.15281	7.12589	7.40783	7.48813	6.71248	6.71301	7.04964
FBgn0023097	3.5725	3.13876	3.85577	0.429832	1.21512	1.32276	3.75597	3.07199	3.68345	3.54886	3.28223	3.52387	3.71624	3.3578	3.90937	3.70488	3.42663	3.73006	4.89478
FBgn0023094	3.48956	3.75992	3.92127	4.05492	4.12808	4.13666	3.65426	3.76801	4.05257	4.67081	4.93574	4.74747	4.13565	4.12827	4.29984	4.99306	5.05093	5.11384	5.53122
FBgn0023095	5.63533	5.21834	5.83897	2.71642	3.32765	3.08935	6.83117	5.41327	6.66423	5.53745	4.99867	5.65417	5.12214	5.48637	5.10784	5.53056	5.47209	5.63364	2.43755
FBgn0037144	0.887592	1.1327	0.896779	3.57652	3.54947	3.94337	0.908265	1.50868	1.45464	0.910733	1.16153	0.838904	1.85985	1.66896	0.973424	0.798141	0.916931	0.888847	6.02814
FBgn0000658	0.133908	0.0430514	0.0831176	0	0	0.118156	0.0873871	0.0466317	0.0480081	0.405557	0.0609378	0.122162	0.0670917	0.0720286	0.0985808	2.72213	2.1621	2.60208	0.245527
FBgn0037140	5.03188	5.23411	5.22971	4.30424	4.82441	3.92812	6.11712	6.07528	6.01022	1.55395	2.35519	1.42182	2.63591	2.86988	2.663	2.00107	1.97331	1.94159	1.86464
FBgn0037491	2.7562	3.0669	2.7192	3.98681	3.8357	4.00386	2.84401	3.111	2.92205	3.11636	3.21051	3.0704	2.77243	2.97458	2.80994	3.17637	3.2422	3.15966	4.17565
FBgn0025808	1.34783	1.21784	1.31662	0.511775	0.574622	0.412793	1.29752	1.43985	1.71143	1.79108	1.62858	1.72884	1.68377	1.43243	1.39432	1.64124	1.81876	1.63535	2.89023
FBgn0025807	1.90355	2.23768	1.7614	1.12144	1.9371	1.40568	1.58723	1.90095	1.8617	1.04798	1.81211	1.27499	1.71671	1.91562	1.51043	1.61326	2.1631	1.66079	4.32022
FBgn0034027	2.85841	2.87657	3.09268	2.21777	2.27157	2.11896	2.96378	2.84462	3.04858	2.29896	2.52911	2.37196	2.9321	2.72903	2.85405	2.68305	2.69071	2.40375	2.47606
FBgn0028708	2.69969	2.60691	2.75064	2.10123	2.69833	2.8662	2.82098	2.54292	2.94471	2.74926	2.54018	2.71945	2.8677	2.50635	2.73976	2.49132	2.46547	2.7273	3.88326
FBgn0025802	3.11141	2.67251	3.17258	1.74471	1.87856	1.0513	3.57891	3.03717	3.66654	3.47862	3.15064	3.47801	3.4825	3.52791	3.66125	3.30259	3.40979	3.01681	2.83799
FBgn0000307	3.12924	2.5415	3.11657	1.94182	1.54329	1.23724	4.6485	3.07179	4.12204	4.24645	3.27478	3.97618	3.62721	3.3224	3.80778	3.88176	2.84632	2.87856	2.38803
FBgn0033869	0	0.0505608	0	0	0	0	0	0.0466317	0	0	0	0	2.69475	2.45016	2.87111	0.111825	0.247613	0.0749311	0
FBgn0011286	6.97438	6.23526	7.17248	0	0.134512	0.237408	6.35688	5.20159	6.11133	3.44871	2.98434	2.8343	6.99198	7.06369	7.02267	3.81056	3.57211	3.58014	2.69829
FBgn0011284	8.89514	8.89938	8.65693	10.6571	10.6765	10.3273	8.85824	8.71681	8.72484	9.83475	10.2039	10.0829	8.85652	8.78361	8.9233	9.68645	9.45619	9.88245	8.42815
FBgn0011289	5.8125	5.96543	5.93023	5.21638	5.09985	5.61654	5.28786	5.32177	5.37544	7.14385	7.04112	6.96904	5.04447	5.07745	5.08668	5.46108	5.52963	5.51696	6.37482
FBgn0033866	0.276227	0.100717	0.215538	0	0	0	0.119245	0	0.0605782	0.189058	0	0.121862	0	0.16662	0.204424	3.50285	2.7991	2.84103	0
FBgn0029152	5.3444	4.82521	5.25362	3.82878	3.82796	3.46787	5.73167	5.2887	5.47393	4.72963	4.55069	4.71056	4.9126	4.61627	4.8765	4.82493	4.51004	4.37125	3.9167
FBgn0039479	7.11979	6.87394	5.36414	0.404938	1.68872	0.705082	3.29429	2.97303	3.3623	4.06278	3.58563	2.48834	4.10333	4.56225	4.60811	3.37339	3.23152	2.42724	0.257867
FBgn0037728	7.59235	7.9964	7.09905	9.0807	8.36832	8.66249	7.54925	8.1076	7.21313	7.20957	6.91064	7.02231	7.34642	7.34542	6.86049	7.3869	7.18573	7.21697	7.52723
FBgn0037721	4.07434	3.69888	3.91381	0	0	0	1.65133	1.56843	1.79741	1.33778	1.4095	0.925496	2.24264	2.63029	2.47932	3.07217	2.85124	3.14311	1.14297
FBgn0014073	3.91023	3.30632	4.44308	0	0.220985	0	4.81228	3.94553	4.47603	5.6476	4.65286	5.92545	4.94315	4.99062	5.29229	3.74207	3.30683	3.37343	0.844814
FBgn0037723	3.56244	4.8467	3.40533	9.7598	9.11299	9.58948	3.30445	4.41875	3.79893	4.32323	4.72128	4.73472	4.46867	4.42975	4.42913	4.34839	4.17635	4.6637	6.64024
FBgn0037722	1.45079	1.52905	1.5723	1.84663	1.98294	1.39869	1.74726	1.90318	1.99119	2.08917	2.01856	1.76164	2.30284	1.81447	1.88981	1.92624	1.73878	1.74242	3.92831
FBgn0037727	0.218087	0.343778	0.254991	4.26832	3.99774	4.2484	0.372333	0.472032	0.371694	1.11335	1.14206	1.27698	0.809122	0.68327	0.606697	1.0656	0.830483	1.08175	0.633608
FBgn0029155	7.59619	6.89364	7.86594	0.575903	1.26745	1.06596	6.22066	5.8478	6.39871	4.37773	4.06744	4.45963	5.63273	5.90052	5.84163	4.35997	4.39369	4.84486	5.05585
FBgn0266742	0.934821	0.96413	0.548597	1.90207	1.82082	1.38184	0.932682	0.766979	0.67554	1.20587	0.663364	0.59758	1.22387	0.777125	0.908748	4.80396	3.67286	4.27753	0.447762
FBgn0034054	2.07632	2.07262	2.18188	1.53488	1.93508	1.24619	2.01899	1.94158	2.15789	2.35201	2.67542	2.38309	2.42656	1.91608	2.29715	2.31928	1.90219	2.12776	3.12062
FBgn0266745	0.983597	0.969979	0.826203	0.888778	0.710357	0.733018	1.094	0.840573	0.823949	1.41764	1.16047	1.02981	1.4214	1.42181	1.47403	0.757564	0.715194	0.757732	0.475684
FBgn0283657	3.1057	3.07402	2.4039	2.719	1.70294	1.71485	4.60935	2.42423	3.06251	3.5162	2.32408	2.47321	2.75918	2.8866	2.47884	2.98085	2.34348	2.35697	4.175
FBgn0283652	2.33688	3.14803	2.2712	3.69545	3.3404	3.68061	2.20494	3.07175	2.02262	2.71166	2.85076	2.71656	2.48826	2.80216	2.32488	2.9112	2.9563	2.81518	2.32534
FBgn0010488	6.17996	6.26477	6.3858	5.2287	5.51119	4.51587	7.24345	6.58911	7.06036	6.78124	6.25891	6.59503	6.70201	6.80021	6.82101	6.48768	6.34267	5.98973	6.41394
FBgn0024975	1.60889	2.12612	1.56707	2.1487	2.18523	2.00377	1.21568	1.57583	1.53994	1.55564	1.9645	1.64506	1.8149	1.77687	1.55629	2.14497	2.21991	2.09585	4.8642
FBgn0283658	6.77309	6.29588	6.91315	6.22585	7.18945	7.23757	6.70996	6.12274	6.73517	5.56693	5.55044	5.69346	5.85638	5.80325	5.9966	5.47161	5.43669	5.71076	4.952
FBgn0010482	7.84467	7.73596	7.5075	0.938409	0.842985	0.484755	7.13044	5.99366	6.485	4.07406	3.62139	3.49102	7.44505	7.22073	6.8633	3.68234	2.87121	2.57081	1.53207
FBgn0031571	2.57647	2.39693	2.81385	0.683744	0	0.312461	4.34357	3.44583	4.02107	2.80269	2.28588	2.47093	2.82277	2.82507	3.02373	3.06866	2.47674	2.51955	0.628618
FBgn0037802	2.08879	2.18436	1.6653	2.07138	1.44599	1.48142	1.81211	2.29085	2.02878	1.75255	1.69274	1.73225	1.94422	1.70902	1.44213	1.93424	1.96747	1.86502	3.88912
FBgn0050424	0.663317	0.38187	0.525636	3.15461	2.99655	3.82366	0.64598	1.00194	0.436717	0.986334	0.954536	0.97778	0.845181	0.768278	0.994009	0.474069	0.568716	0.671371	0.452298
FBgn0050421	4.15323	3.97772	4.30412	2.74263	3.01542	2.63802	4.79074	3.97541	4.70945	5.68388	5.03494	5.69573	4.13234	4.28805	4.32951	4.64014	4.51754	4.69548	4.90563
FBgn0050423	7.14644	7.4703	6.47966	8.41536	7.61024	7.86917	6.47687	6.58201	5.78733	5.96674	6.07402	5.79766	6.82029	6.90445	6.47653	6.39969	6.7416	6.13745	6.18292
FBgn0263864	3.49005	3.20928	3.75919	0.710444	1.31101	0.135557	3.82852	3.4205	3.95546	3.67148	3.20254	3.58258	3.6389	3.2087	3.64239	3.76258	3.58686	3.14357	2.6356
FBgn0050428	2.50438	2.27563	2.38876	2.47956	2.49643	2.73185	2.95431	2.72658	2.44137	2.93402	2.79034	2.69496	2.64609	2.47375	2.40023	2.83311	2.81113	2.68257	0.316905
FBgn0263863	4.76316	4.74636	4.82873	6.06457	5.79953	5.76767	4.54924	4.5119	4.68314	3.37998	3.80969	3.41712	4.08605	4.0775	4.21875	3.72555	3.63099	3.81042	4.99909
FBgn0033397	2.70764	2.12144	2.42856	2.66739	3.3846	1.19391	1.85811	1.428	1.32656	1.55344	1.53682	0.923019	1.25775	1.31765	0.89401	1.28209	0.891513	0.321792	0.293746
FBgn0033391	3.17176	3.9241	5.32225	2.65946	3.35248	3.49152	4.06032	4.58709	3.2422	4.81492	4.15879	5.42297	5.1242	5.40524	5.67463	4.4463	4.3627	4.58453	6.04656
FBgn0033392	1.45339	1.53868	1.70577	1.39967	1.73123	1.34203	1.32774	1.25448	1.64658	1.7648	1.63797	1.62932	1.46225	1.50423	1.35229	2.0328	1.97037	1.93723	4.16259
FBgn0285962	3.60548	3.48876	3.58652	2.12516	2.67613	2.97897	3.72243	3.6115	3.53392	3.67614	3.72141	3.26794	3.62627	3.5424	3.53306	3.42611	3.55133	3.30554	2.28741
FBgn0034059	3.25281	3.69692	2.79729	4.85921	5.23187	4.60924	2.52443	3.20727	2.57032	3.48685	3.95676	3.31761	3.15904	3.42814	3.02741	3.82938	3.98303	3.75632	4.16754
FBgn0024510	1.7847	2.28456	1.92498	1.1593	2.27475	1.61936	2.01971	2.29481	2.17456	1.78429	1.71016	1.83229	2.13081	2.17973	1.83485	1.69103	2.1027	2.00778	4.66585
FBgn0035424	3.2846	3.05396	3.09355	2.17186	2.13109	1.39641	5.06913	2.92766	3.87099	3.93307	2.53895	3.13468	3.19978	3.41391	3.06181	3.52215	2.19687	2.22465	5.33658
FBgn0035425	4.21094	4.74523	4.05116	3.05854	2.96448	3.36793	4.56708	4.73318	4.44673	4.27741	4.17934	4.09133	4.4834	4.53776	4.22607	4.5046	4.5347	4.4833	6.44649
FBgn0035427	0.586907	1.11186	0.347543	0	0	0	4.94563	4.5301	4.90986	0.307523	0.359055	0.403593	0.237552	0.32706	0.387828	3.87413	3.19071	3.16615	0.0327785
FBgn0035420	2.94594	2.72702	3.04008	1.92075	1.92375	0.860219	3.73089	3.13885	3.84867	4.04677	3.70743	3.82031	3.34355	3.43618	3.62716	3.89665	3.56946	3.38566	3.59922
FBgn0035421	2.88124	3.10319	2.89401	2.59685	3.18351	3.56157	3.34395	3.45962	3.4433	3.81177	4.11299	3.6863	3.38579	3.55019	3.52384	4.3196	4.44715	4.48664	5.27642
FBgn0035422	8.79341	8.73574	8.71977	10.1766	10.2817	9.82517	8.86689	8.76722	8.61622	9.43368	9.86345	9.72864	8.81926	8.63341	8.85222	9.35612	9.21889	9.69107	7.63197
FBgn0035423	8.60575	8.71335	8.23284	9.63497	8.70542	9.26824	8.50969	8.80278	7.90587	7.63791	7.64744	7.32005	8.21498	8.17871	7.87478	7.94675	7.87473	7.66176	5.89571
FBgn0033139	0.562843	0.939255	0.76562	6.3513	5.49144	6.02898	0.818209	1.03017	0.943944	1.41563	1.15665	1.57216	1.51051	1.5312	1.62303	1.01713	0.940945	1.28796	2.04734
FBgn0030734	5.87455	5.9529	5.88671	3.80792	5.37735	4.50285	6.70504	6.5384	6.47957	8.58637	8.49416	8.20893	6.47867	6.82041	6.665	7.45755	7.72974	7.68655	5.15319
FBgn0033649	3.77959	3.25099	4.00144	1.27557	0.479463	0.333273	4.38057	3.01168	3.81422	1.68503	0.844627	1.25747	4.71425	4.75265	4.5031	2.47147	1.48874	1.69294	0.374558
FBgn0036450	3.65861	4.0236	3.84141	1.78204	2.72526	2.59804	3.71125	3.51153	3.9068	4.27991	4.1514	4.26774	3.90777	4.08513	3.88585	4.25364	4.12189	4.46725	5.19952
FBgn0033644	1.1282	1.12442	1.56523	3.18729	2.54671	3.45452	1.55691	1.57247	1.70925	1.42908	1.21607	1.43435	1.11467	0.918313	1.25017	1.07103	0.68244	1.44248	0.812952
FBgn0033133	1.19165	1.96154	1.23825	0	0	0	1.96895	2.07874	1.82776	0.370364	0.404331	0.230648	0.495018	1.08734	0.708734	0.136142	0.399392	0.174214	0.241696
FBgn0033134	8.00969	9.14813	7.60598	3.98412	3.88705	3.53789	7.56375	8.20564	6.98672	5.99312	6.80221	6.2964	5.93487	6.97321	5.54242	6.69206	6.74887	6.34246	2.85068
FBgn0033135	4.65293	5.38993	5.68259	1.13064	0.463553	0.785544	1.86468	2.52423	2.70389	1.81377	2.42375	2.18496	4.44349	4.5637	5.12361	2.21901	1.94104	2.81567	0.431465
FBgn0033137	2.89205	2.91201	3.20434	1.43839	0.735347	0.681295	1.01149	1.15965	0.959167	1.33121	1.16511	1.26532	2.74725	2.43286	2.89572	1.85308	1.77232	2.18459	0.0803793
FBgn0030731	5.90846	6.17861	5.65841	9.28758	8.88531	9.3273	4.76465	5.322	5.22246	6.162	6.33936	6.16689	5.5923	5.71183	5.90388	5.92509	6.05002	6.32537	6.15682
FBgn0040503	1.95156	3.41707	1.81358	8.59646	8.35941	7.31443	2.80701	4.18776	2.23495	3.14798	4.19896	2.5627	3.67754	4.26208	2.80624	2.9944	3.3961	2.48734	0.3047
FBgn0040507	2.89475	2.75898	3.42604	0	0	0.464978	6.01473	5.53206	6.25897	1.17877	1.65943	1.23053	2.07437	2.12951	2.39085	5.74953	6.01376	5.61226	1.58243
FBgn0040505	3.70705	4.005	3.9668	0	0.175862	0.0760569	2.76001	2.389	2.21036	0.546084	0.629677	0.698822	3.15202	2.98678	2.83393	0.69076	0.694944	0.451039	0.869394
FBgn0039890	6.43838	5.4397	6.48525	5.11745	5.12827	4.93749	6.89461	6.56014	6.51147	6.07402	5.73943	5.99131	6.44358	6.14817	6.35461	6.02691	5.7361	5.32786	2.41214
FBgn0039897	7.4689	6.09291	7.48166	0.157939	0.178404	0.490749	7.01539	5.77566	6.30588	4.05552	2.99219	3.33725	6.71406	5.66348	6.30331	3.54962	2.27893	2.48189	1.28702
FBgn0039896	3.08404	2.43619	3.05488	0	0	0	1.99562	1.83119	1.82606	0.717543	0.383118	0.649895	2.93635	2.24444	2.74002	2.82826	1.7804	2.3789	0
FBgn0250753	7.79404	7.79455	7.75505	5.8727	7.59372	5.87074	8.41882	8.85801	8.34408	8.04333	8.06292	7.9802	8.05883	8.16617	8.13194	8.09895	7.79866	7.53434	6.57723
FBgn0250755	1.98159	1.84842	2.27438	1.20927	1.99381	2.07117	2.37991	2.20991	2.414	2.5702	2.54437	2.76776	2.46444	2.48011	2.62479	1.94929	1.61845	2.13649	3.33732
FBgn0034986	4.47195	4.91991	4.19255	4.63703	4.72026	5.4107	4.1615	4.64797	3.88825	3.55803	3.93738	3.43488	3.81155	4.13652	3.68415	3.7629	3.85351	3.81669	4.40239
FBgn0035397	3.26898	2.44379	3.8867	1.89501	1.87491	1.32552	5.54163	2.92745	4.6406	5.05754	3.8756	4.53677	3.24044	2.72371	3.50663	5.11064	4.17805	4.88241	4.05102
FBgn0031603	4.20128	4.02829	3.75593	4.0959	3.36565	3.6514	3.93587	3.73645	3.44387	4.32676	4.13834	3.8019	4.25129	3.92723	3.97764	4.08791	4.20636	3.89143	3.2875
FBgn0035392	2.9314	2.64802	2.4093	5.90084	5.00131	5.51218	2.12884	2.24478	2.26505	2.84811	3.14514	3.02182	2.66474	2.68759	2.60307	3.00474	2.7393	2.98512	3.34491
FBgn0035393	2.46581	4.01701	2.35851	3.01045	3.78839	3.81831	2.32061	3.81553	2.44316	2.29207	2.47203	2.33298	2.77122	3.14011	2.26844	2.88759	2.07406	2.59635	3.18014
FBgn0035390	5.00129	4.82649	5.23673	2.94221	3.89794	3.45656	5.28214	5.16475	5.4666	4.42068	4.36805	4.43598	5.6028	5.68087	5.79915	4.53609	4.38453	4.50885	4.26984
FBgn0027329	6.49201	7.85467	6.19483	6.21929	6.38637	6.43338	5.87788	6.70888	6.06893	5.64838	5.8676	5.69193	6.18642	6.8502	5.70037	6.26843	6.34822	6.21289	8.66124
FBgn0010223	2.34401	2.73965	2.49113	2.22638	2.21216	2.36758	3.55092	4.62389	3.44756	7.54635	7.50122	7.81919	4.5365	4.78302	4.59919	8.90378	9.08448	8.86048	0.755008
FBgn0005771	4.60543	4.14552	4.60935	3.69956	3.92807	3.50433	4.62862	4.0487	4.47154	3.77701	3.47966	3.92659	3.98851	3.85095	4.19337	2.95435	2.4544	2.88021	1.77684
FBgn0003651	3.32909	2.80242	3.09056	4.56004	5.84162	5.11764	2.42795	2.66279	2.44962	3.18594	3.27674	3.35486	2.84266	2.78841	2.83531	2.78628	2.51673	2.94596	1.73483
FBgn0005777	4.07393	4.09652	4.02328	2.74806	4.27986	3.71898	4.34653	4.5069	4.43359	3.86875	3.78542	3.82368	4.04219	4.10099	3.87079	3.91157	4.03566	3.88684	5.37293
FBgn0250788	8.03666	7.73687	8.27993	5.04029	5.96011	5.39438	8.6472	7.76174	8.5204	7.8335	7.50949	8.00201	7.9027	8.08883	8.07374	7.34659	7.62393	7.38355	5.62961
FBgn0040102	2.45386	2.29828	2.64896	0.917297	0.569459	0.997783	4.43661	4.49861	4.06436	2.0784	2.1734	2.13314	7.21831	6.74309	6.94719	1.64843	0.972891	1.2479	0.973911
FBgn0013705	0.812844	1.31121	0.457743	4.63628	3.90791	3.67931	0.393071	0.496124	0.242052	0.0840996	0.357042	0.264533	0.911995	0.696676	0.537612	0.385652	0.293122	0.145487	0.350661
FBgn0013704	3.18755	3.50731	2.1053	6.14948	5.67248	5.43712	1.61911	1.78554	1.06039	0.383053	1.37759	0.988029	2.20066	1.83913	1.99366	1.16751	1.26826	0.944583	1.46319
FBgn0010220	3.66154	4.24655	3.68146	3.58376	3.37345	3.23579	3.98727	4.09469	3.97704	3.90468	3.79449	3.84915	3.63169	3.77954	3.49972	4.06022	3.73283	3.72726	3.63472
FBgn0013701	1.1033	1.43938	0.611866	4.7967	4.38497	4.12303	0.570134	0.590912	0.260152	0.131578	0.558977	0.317682	1.18881	0.848198	0.840005	0.453855	0.396916	0.281731	0.452858
FBgn0041194	3.81479	3.8757	3.913	9.88411	9.17296	9.86056	3.92953	4.55531	4.39984	5.27545	5.36002	5.74639	4.912	4.88012	5.23508	4.92192	4.53555	5.31346	4.92664
FBgn0045073	6.04726	5.30377	6.21874	3.37402	4.73754	3.4989	6.73729	5.95582	6.5816	6.33499	6.14099	6.38753	6.41955	5.9198	6.56071	5.87663	5.55462	5.52949	3.98368
FBgn0267443	1.51074	1.92397	1.43638	1.46522	0.419061	1.02497	1.69968	2.00498	1.79893	1.59147	1.53192	1.89187	0.993659	1.14436	1.10912	2.58218	2.29569	2.79173	0.225342
FBgn0250786	4.60748	4.28635	5.03287	3.94171	4.59283	4.24473	5.28105	4.59197	5.29425	5.3986	4.97372	5.23988	4.70555	4.8007	4.89825	5.55085	5.42696	5.6116	7.17209
FBgn0025394	4.32757	4.0982	4.56892	2.58351	3.98259	3.22843	4.74004	4.43423	4.69928	4.94008	4.60658	4.93373	4.3431	4.40144	4.48856	4.6932	4.59561	4.68896	5.11467
FBgn0025640	5.5455	5.77455	5.33465	7.88985	7.72538	7.68433	5.2595	5.2305	5.07828	5.92377	6.17846	5.95233	5.47461	5.40262	5.48334	5.90355	5.9844	5.86985	5.38825
FBgn0025643	5.56248	5.46478	5.14228	0.374278	0.592535	0.698335	1.31144	0.944491	1.79559	1.99301	1.58998	1.65321	1.44274	1.09912	1.60506	0.987084	0.777031	0.785576	1.39062
FBgn0025390	2.90716	1.81521	3.3028	1.95902	1.70176	1.67101	5.30291	2.22599	3.6065	4.14421	2.31433	3.06527	3.1149	2.26288	3.01873	4.12298	2.4543	2.84202	2.46704
FBgn0063449	2.27497	3.86523	1.99257	4.23391	4.07507	4.30184	1.98865	3.3906	1.71503	2.12348	2.42256	1.92242	2.19347	2.89636	1.51709	2.91331	2.77293	2.46205	2.47942
FBgn0011648	4.43342	3.97394	4.48413	3.48942	4.02692	4.34453	4.46236	3.94338	4.49078	4.44185	4.1622	4.56544	4.26764	3.9949	4.36783	5.0034	5.21233	5.47775	5.72436
FBgn0030099	4.44588	4.40424	4.02105	3.49299	3.35585	3.26627	3.57229	3.28548	3.274	3.77815	4.07829	3.50156	4.20433	3.91388	4.14861	3.7882	3.61833	3.51288	3.49027
FBgn0262509	5.46186	4.72941	5.17177	0	0.0946517	0.247761	6.46333	4.65329	5.43429	2.24238	1.42193	1.91114	5.44189	4.74986	4.98367	2.33211	0.750439	0.852325	0.12798
FBgn0262508	7.80966	6.97226	8.08784	3.10974	3.80466	3.56025	7.48376	6.44006	7.28046	6.4288	6.29014	5.90886	7.18733	7.15546	7.13499	4.51094	4.11785	3.81488	3.08562
FBgn0029768	9.62161	8.70676	9.72838	2.22356	2.57917	2.80424	10.4816	9.49049	10.4912	5.01593	5.29662	4.99432	5.29236	5.21658	5.72883	9.72062	9.60835	9.34203	0.454956
FBgn0029769	4.63946	6.02882	4.20278	8.74983	8.57278	8.52923	4.11959	5.81169	4.90246	4.85885	5.44156	5.32803	5.04869	4.81374	5.1714	5.83726	5.26657	5.80283	2.73182
FBgn0032518	10.4965	10.7827	9.96768	13.6988	13.6091	13.1514	9.60209	9.80593	9.17935	9.59653	10.3242	10.2209	9.7033	9.50966	9.64769	10.1328	10.0359	10.3013	9.70226
FBgn0032515	6.0245	5.88345	5.98619	4.959	4.57005	4.73349	5.57682	5.82506	5.71918	4.11398	4.25047	4.20381	5.56669	5.2894	5.73239	4.55363	4.68101	4.64141	5.29348
FBgn0039274	3.12528	3.91037	3.12021	3.58872	3.90859	4.29577	3.14809	4.12344	3.04671	3.02271	3.19555	3.02	3.49095	3.6527	3.00309	3.3482	3.37145	3.0306	3.51373
FBgn0039277	4.47526	4.01819	4.4271	0	0	0.0874007	4.36462	4.26158	3.90883	1.38797	1.24314	1.12686	4.79305	4.95458	4.38031	1.73728	1.38595	0.956029	0.168956
FBgn0029761	1.48311	1.85889	1.17421	0	0	0	1.01582	0.490659	0.452389	0.21768	0.248645	0.192086	3.30592	2.343	2.0194	0.361083	0.146425	0.122882	0.0435412
FBgn0032511	6.37243	6.19479	6.31421	7.29432	6.7722	6.85307	6.04617	5.88548	6.08629	5.10957	5.40198	5.04861	5.75473	5.62437	5.92483	5.21448	5.2061	5.30856	4.68914
FBgn0039270	2.3742	2.28696	2.29827	0.795696	2.09089	1.59388	2.70247	2.71444	2.69131	2.46636	2.3755	2.34962	2.3581	2.3879	2.43857	2.23003	2.50241	2.17194	2.56562
FBgn0032513	3.3288	3.68615	3.52833	3.2919	4.15373	4.29282	3.02425	3.44906	3.28313	2.59032	2.80033	2.76515	2.86279	3.21908	2.98314	2.74652	2.93263	2.93126	5.09765
FBgn0039272	2.00967	1.96776	1.85599	1.90475	1.72515	2.05145	2.37282	2.29813	2.3036	1.54221	1.62745	1.33462	1.95114	1.85649	1.7036	0.773726	0.978937	0.429968	3.34605
FBgn0039359	8.90772	8.9843	8.87203	10.0491	10.2933	10.212	9.01817	9.06197	8.75274	9.74951	10.1887	9.96847	8.94531	8.84862	9.14244	9.7415	9.44627	9.95905	7.49222
FBgn0265042	7.24851	6.67993	7.76901	2.00383	2.39851	2.15595	4.39497	4.2101	4.75287	3.29959	3.25878	3.66513	6.86948	7.30299	7.11757	5.14591	4.66141	4.9692	4.85073
FBgn0265045	5.71627	5.65742	6.14526	5.07813	5.10215	5.13183	6.08912	4.9633	5.87194	5.79906	5.90729	5.6655	4.71571	4.86253	4.665	5.21272	5.31825	5.03242	4.65783
FBgn0030943	1.84726	2.28924	1.82693	1.95822	2.34477	2.21633	1.8854	1.79644	2.20783	2.13286	2.21283	1.99137	2.32771	2.0839	1.72387	2.22398	2.58768	2.3134	6.25531
FBgn0264270	5.53396	5.24456	5.13363	4.94961	4.31576	3.86502	6.11139	5.17324	5.33381	6.03723	4.73756	5.2838	5.54252	5.04206	5.08645	4.61358	4.52833	4.31431	3.96819
FBgn0039356	1.771	1.64882	1.48995	3.42024	3.37881	3.5507	1.82254	1.7928	1.77445	3.52229	3.24599	2.77534	1.82395	1.97563	1.91065	2.65779	3.10789	2.75454	2.23744
FBgn0037934	0.736674	0.1463	0.466913	0	0.334877	0.327318	0.862504	0.92825	0.642439	7.17435	7.05733	7.3952	1.57291	1.31965	1.56626	3.53072	2.59699	3.88153	1.45159
FBgn0037935	1.56571	0.931703	1.47303	4.56514	4.37237	3.53727	1.78895	1.51736	1.75332	3.98824	3.47923	3.64547	1.78515	1.57961	1.83993	2.39918	1.40641	1.98813	0.704158
FBgn0037936	1.79409	2.90687	1.36699	3.68919	3.29695	4.01441	1.21391	1.405	0.976979	4.77659	5.25903	4.6234	1.38542	1.81609	1.3358	1.54475	1.57619	1.49473	1.21196
FBgn0260760	4.07315	4.01726	3.92571	3.97477	3.74212	3.71834	3.92622	3.96262	3.72109	4.3967	4.57485	4.17113	4.17328	4.16399	4.17693	4.76369	4.67036	4.80644	3.67628
FBgn0037930	3.50177	3.6787	3.35736	5.49953	5.60766	5.68666	3.24506	3.6328	3.11448	4.1153	4.49017	4.02907	4.31317	4.33781	4.09514	4.34222	4.08934	4.36272	4.84407
FBgn0037931	1.96933	1.80766	2.20606	0.624331	1.27301	0.792083	1.98415	1.77222	2.04292	2.40971	2.44517	2.43184	2.28358	2.13528	2.37322	2.47751	2.26825	2.43101	2.67316
FBgn0037933	3.67114	2.99503	3.72589	4.26398	3.88503	4.13541	4.40301	3.73529	4.19006	3.79421	3.62683	3.64203	3.89367	3.42633	3.90721	4.37612	3.42495	4.02651	2.85616
FBgn0000536	8.49509	7.61639	8.59919	6.82724	7.32959	7.56818	9.69905	9.07792	9.66294	6.34203	6.11484	6.4486	6.65459	6.59604	6.67592	5.86067	5.68024	5.77287	4.28559
FBgn0000533	6.44027	6.19765	6.31055	0.831748	0.72668	0.959905	2.13558	1.90095	2.82939	2.40057	2.59946	2.22641	6.219	5.8649	6.1726	4.18862	3.69948	4.11562	4.2728
FBgn0016081	5.04755	4.73358	5.71777	2.50455	2.36129	1.77368	4.54864	3.84977	4.73206	5.25819	4.96265	5.0054	4.56688	4.63412	4.91556	5.30127	5.06411	5.12331	3.85771
FBgn0003321	4.00201	3.35728	4.28557	3.13425	3.20384	3.17448	4.90892	3.88909	4.75364	4.81262	4.20122	4.79208	4.30744	3.89223	4.52111	5.05932	4.55733	5.00928	4.25944
FBgn0039644	3.13609	3.43751	2.75769	3.56475	4.1505	3.56993	3.3449	3.06039	2.89243	3.18369	3.32385	3.42464	3.48867	3.54495	3.41823	3.93732	4.13157	4.15723	6.80572
FBgn0003328	4.14128	5.24456	4.26796	1.84942	2.16119	2.03399	5.22736	5.77911	4.88246	5.42928	5.29233	5.8404	5.1188	5.27706	5.49353	5.91903	6.24604	6.26488	3.73253
FBgn0039640	7.37736	6.82172	7.81435	0.429832	0.239789	1.17585	2.94262	3.15073	4.27962	4.12125	4.23474	3.91922	6.08774	6.2743	5.91232	5.20369	5.55794	5.02585	7.80542
FBgn0039641	2.5472	2.86478	2.40267	2.85903	2.83645	3.06326	2.36026	2.273	2.18773	3.29444	3.39941	2.94678	2.66349	3.17533	2.67528	3.11965	3.18948	3.05753	2.62093
FBgn0039642	1.83863	2.00396	1.66088	3.37148	2.83377	3.53171	1.83861	1.98759	1.73123	1.61551	1.81469	1.51807	2.08356	1.98425	1.92191	1.8168	2.00616	1.78585	3.59435
FBgn0031090	4.84068	4.13168	5.00798	3.64081	3.71863	3.6691	5.1222	4.26236	4.95106	4.91031	4.3137	4.78677	5.14827	4.87467	5.27468	4.60266	4.48996	4.77506	5.22471
FBgn0031093	4.35294	4.7202	4.16691	6.02998	5.7722	5.55793	3.51007	4.01819	3.68483	3.75948	4.14946	3.58868	3.92175	3.9696	3.6245	3.97759	4.46375	4.11528	5.89845
FBgn0028380	2.80453	2.97402	2.66352	2.491	2.7238	2.61505	2.85563	2.87405	3.11164	3.14779	2.92383	3.21268	3.29275	3.08659	3.01439	3.22332	3.53298	3.46716	4.41363
FBgn0031094	3.42693	3.64949	3.54677	3.47809	3.37058	3.41714	3.33623	3.54814	3.34316	3.16407	3.4193	3.07519	3.41295	3.42937	3.50234	3.37765	3.65138	3.41609	4.25706
FBgn0031099	5.62859	5.53931	5.32339	6.02237	5.52697	5.61125	5.08686	4.74734	4.88093	4.23183	4.44151	4.16483	4.77201	4.73099	4.63434	4.79377	4.58763	4.51665	3.91274
FBgn0031098	2.91886	3.27365	3.16532	2.05938	2.54965	2.63607	2.78465	2.89377	2.97608	3.00952	3.19943	3.17036	2.75211	3.12902	2.9583	3.56289	3.75825	3.79933	3.91925
FBgn0004635	4.34506	5.32645	4.27646	0	0.5235	0.334961	1.95974	2.25738	1.66946	3.71173	3.33727	3.97576	2.4772	3.49532	2.38223	6.04998	5.17209	5.90988	0.539045
FBgn0035911	2.9898	3.24585	3.10497	5.45296	5.26908	5.35827	2.8495	3.1582	3.1424	2.89451	3.3359	2.87318	2.93909	3.06286	2.76655	3.16515	3.41672	3.19631	5.69051
FBgn0011361	7.97711	7.89069	7.67675	9.3964	8.80088	9.41601	7.25187	7.42176	6.95473	6.06388	6.41347	6.06382	6.7373	6.65959	6.61552	6.25438	6.48327	6.33086	6.95073
FBgn0004636	4.42043	4.42532	4.18515	4.78363	4.78932	4.59082	5.87514	4.89815	5.07164	5.28839	4.165	4.92449	4.97479	5.22569	4.87057	4.38036	3.85423	3.6518	4.82676
FBgn0016660	1.34372	0.800161	1.52881	0	0	0	0.827591	0.323903	0.438151	0.135197	0.0352373	0.100445	2.0723	1.95604	2.0498	0.105235	0	0	0.114059
FBgn0266539	3.2371	3.53008	3.33669	3.02733	3.08523	3.04528	2.97118	3.21437	3.28444	3.22982	3.28449	3.35683	3.06746	3.21517	3.05362	3.77461	3.7145	3.74332	4.69599
FBgn0029944	3.071	2.40718	3.21948	0.525792	1.45684	1.18008	3.49574	2.71266	3.28251	4.68012	4.01684	3.98812	2.81162	2.6803	2.87637	3.56854	3.26916	3.29755	4.05768
FBgn0029945	0.675639	0.696184	0.790935	0.807219	0.51143	0.973183	1.36316	1.44771	0.932623	7.52568	6.75445	7.04733	1.30581	1.13553	1.29571	4.45592	4.34281	4.69515	0.18236
FBgn0029942	4.7837	4.89267	4.83432	5.64113	5.56676	6.10495	4.3545	4.64599	4.49404	4.04286	4.12733	3.73827	4.38667	4.44487	4.51227	3.81794	3.88069	3.81395	4.61409
FBgn0029943	3.62022	3.5881	3.67258	2.96497	3.41737	3.80259	4.06666	3.84496	3.81357	5.06245	4.83603	4.69362	3.76619	3.61813	3.56122	3.96996	3.93488	3.94938	2.88259
FBgn0029941	4.41254	4.35797	4.63711	3.772	4.36833	4.71075	5.04278	4.56071	5.07012	5.16057	4.90912	4.9984	4.86393	4.76043	4.79513	5.2584	5.36154	5.30915	7.53864
FBgn0267523	0.598211	0.722565	0.236767	3.08947	3.52637	2.77266	0.25494	0.251169	0.105154	0.395901	0.31473	0.237025	0.473606	0.265737	0.153893	0.247136	0.412769	0.194172	0.30237
FBgn0035370	6.25137	6.325	5.97109	6.44003	5.93133	6.22031	6.2156	6.57537	6.03923	5.7114	5.84003	5.69461	5.83392	5.91372	5.70535	5.72104	5.99787	5.94232	7.50617
FBgn0011829	0.321975	0.253746	0.134725	0	0	0	0.0247676	0.0636634	0.078054	0.233126	0.193113	0.0512777	0.071009	0.0206329	0.0226485	2.50776	2.45905	1.73077	0
FBgn0027094	4.4838	5.67593	4.38668	6.44427	6.79222	6.19831	4.24995	5.10554	4.70462	6.02486	6.27181	5.86816	4.89688	5.31074	4.70984	5.85784	6.01463	6.00226	7.50614
FBgn0027095	5.18443	5.44977	5.00289	5.75057	6.57709	5.83102	5.43645	6.30035	4.89007	8.06091	7.5059	7.03158	6.01494	6.97417	6.17452	7.24511	7.97849	7.42747	4.36398
FBgn0027093	3.58459	3.80571	3.5314	2.15322	4.05737	2.67811	4.00962	4.42904	3.88658	4.42627	4.58367	4.37994	3.71073	3.81347	3.55301	4.25721	4.21123	3.98928	3.30783
FBgn0027090	4.66453	5.0396	4.71043	5.69773	5.74096	5.66043	4.5102	4.72037	4.67704	5.01809	5.21031	5.02564	4.55549	4.73509	4.69652	5.24623	5.26055	5.43604	6.49174
FBgn0027091	3.53333	3.84456	3.49244	4.59608	4.81723	4.41275	3.41613	3.68789	3.51102	4.07039	4.14299	3.85891	3.42809	3.66311	3.18257	4.38	4.54319	4.62637	5.72336
FBgn0030808	3.52181	3.3267	3.69372	2.16222	3.1816	2.56453	4.11704	3.72565	4.03399	4.20855	3.87955	4.36918	5.89428	5.53363	6.32289	4.25073	4.26598	4.48186	4.21098
FBgn0034602	2.77012	2.23407	2.99215	2.75802	3.62751	3.9244	2.27453	2.63527	2.25998	5.42654	4.81073	5.43176	2.79828	2.69804	2.65027	2.1991	2.00417	1.75444	1.00773
FBgn0033038	3.90742	4.09324	4.15115	3.76047	4.05235	3.68654	3.55981	3.48357	3.79077	3.58406	3.78586	3.61286	3.47412	3.79032	3.70741	3.79223	3.83154	3.77673	3.72275
FBgn0034606	3.43916	2.70845	3.56694	0.332536	0.0946517	0.363874	5.40911	3.95754	5.47221	4.48513	3.84447	4.44741	4.04161	3.61886	4.46759	4.73896	4.42301	4.61035	1.75328
FBgn0034605	4.95741	4.53361	5.06145	5.31359	5.0824	5.64706	5.27332	4.69931	5.09891	2.84966	2.83525	2.8077	2.99893	2.77754	3.00837	3.19014	2.4735	3.02397	1.68133
FBgn0040089	3.75977	4.31135	3.7448	3.96283	4.19506	3.99372	3.07011	3.17577	2.8386	1.82597	1.98821	1.79325	3.52816	4.07319	3.32257	1.68896	1.92862	1.68583	2.04967
FBgn0015286	5.16941	4.97344	5.13788	4.06432	3.67665	3.32939	6.89187	5.99423	6.15327	5.12884	4.38017	4.98637	5.21505	4.81123	5.0466	4.37453	3.43634	3.73862	3.5112
FBgn0034354	5.74221	6.0519	5.41176	5.62661	5.33394	5.29148	5.185	5.17562	5.10074	5.43597	6.0239	5.3933	4.935	4.93925	4.83931	5.50022	5.95744	5.3394	5.4639
FBgn0034356	2.18576	1.88381	1.07528	5.77098	5.91495	5.13103	2.34584	1.95422	1.56869	3.68306	3.44335	2.61204	3.05775	2.78927	2.20985	3.20633	2.75249	2.2438	2.30627
FBgn0015282	6.51591	6.50517	6.21676	7.64573	6.69329	6.87105	5.97893	5.83517	5.83059	6.52948	6.5734	6.40086	6.24202	6.24575	6.20242	6.58125	6.48359	6.64667	7.66199
FBgn0015283	5.85162	5.8506	5.61328	6.55057	5.70259	5.93077	5.59052	5.38708	5.36591	5.674	5.66602	5.42176	5.49046	5.37534	5.17837	5.54328	5.55943	5.54165	6.37042
FBgn0040080	5.04746	5.41754	4.87109	3.68065	4.06696	4.16659	4.62694	4.76219	4.6077	4.3236	4.07124	4.14694	4.73603	4.81267	4.61304	4.47949	4.78308	4.6425	6.09731
FBgn0038110	3.56607	3.26332	3.66548	3.79645	3.97261	3.7829	4.40667	4.30017	4.22825	4.23097	4.18989	4.07485	3.66338	3.65725	3.60087	4.39692	4.15742	4.3467	3.44925
FBgn0038115	1.69755	1.94564	2.44282	4.10387	4.73081	5.52692	1.13707	2.25873	2.27805	3.17699	3.78085	4.10786	2.12266	2.3198	2.8822	3.63452	3.86519	4.46919	3.4066
FBgn0038114	2.45536	2.38371	2.70077	0	0	0.06937	0.810159	1.01471	1.09035	0.979307	1.36999	0.881019	1.03836	1.01198	1.41587	1.10535	0.842647	1.14477	0.370117
FBgn0011826	4.68083	4.09632	4.88404	4.14882	4.83884	4.81727	5.11308	4.44276	4.99654	4.91561	4.45252	4.84655	4.84301	4.74339	4.86607	4.87102	4.90848	5.08178	6.53211
FBgn0037556	3.74032	3.42064	3.84767	1.11682	1.88688	0.620359	4.31195	3.63627	4.39181	4.1005	3.55942	3.89705	3.8755	3.88313	4.11087	4.08595	4.01445	3.7352	3.87667
FBgn0030274	3.23568	3.20752	3.41166	3.24971	3.32565	3.55733	3.36187	2.90936	3.31988	3.42883	3.42478	3.35442	3.1266	3.2132	3.27645	3.59171	3.42598	3.45714	4.61953
FBgn0037555	3.85124	3.69333	3.82748	3.55847	3.38138	3.91472	4.02411	3.52747	4.10736	4.23414	4.10121	4.14569	4.12182	3.85338	3.88345	4.56767	4.43674	4.51691	6.77663
FBgn0030272	3.54156	3.47808	3.3724	2.94352	3.72125	3.19889	1.4378	1.48277	1.75099	2.10412	2.52583	1.86783	1.98026	1.9549	2.25999	2.05658	1.52885	1.63411	2.56441
FBgn0037553	1.08869	1.23729	1.27208	4.62411	4.93365	5.66122	1.93338	2.26589	1.90801	1.93966	2.39946	2.61035	3.41639	3.64233	3.65931	1.70937	1.62917	2.15015	1.32783
FBgn0037550	3.60928	4.00389	3.28353	4.483	4.22323	4.22571	2.74128	3.37937	2.671	2.984	3.34664	2.96772	3.06234	3.3902	3.03152	3.36766	3.61338	3.50199	4.24462
FBgn0030271	1.66355	1.63781	2.00572	1.30684	1.34916	1.90698	1.69854	1.59806	1.95481	0.822029	0.830218	1.23016	1.88678	1.33344	1.80046	0.658682	0.510587	0.962459	1.6965
FBgn0034117	1.35345	1.0991	1.34751	4.48211	4.8326	4.64926	2.11154	2.52576	2.35505	4.93917	5.26746	5.23077	3.18519	2.9243	3.37488	6.01423	5.40233	5.68917	3.01963
FBgn0040262	0.388224	0.590277	0.702329	0	0	0.0254293	0.296698	0.322304	0.543939	1.24377	1.15897	2.63129	1.39883	1.4635	2.16276	0.69649	0.809297	1.10508	0.284335
FBgn0040260	5.1561	4.95937	5.77319	1.44324	1.51571	2.37606	3.36696	3.41122	3.94447	3.08559	3.01801	3.56885	4.61058	4.32973	5.02236	3.12624	2.2955	3.29003	2.9544
FBgn0010014	0.861717	0.698064	0.850866	0	0	0.0504182	0.304166	0.178112	0.385524	0.423073	0.130265	0.141796	1.72109	1.42325	1.52352	0.207825	0.042349	0.0951015	1.33858
FBgn0010015	5.17196	4.35097	4.87523	0	0.124871	0.0749816	4.02992	3.26184	3.68671	1.95584	1.5416	1.45202	5.64071	4.58676	5.50327	1.99334	1.35769	1.66449	0.769919
FBgn0010548	5.40074	5.68502	5.03937	6.37858	6.63303	6.79594	5.4163	5.13638	5.56595	5.1352	5.30354	5.25973	7.07237	6.84609	7.47771	5.22417	4.8318	5.62068	5.73325
FBgn0004237	4.92251	4.64582	4.92953	3.63653	4.62062	4.17956	5.65393	5.28337	5.44144	5.8013	5.27843	5.7311	5.12919	5.04699	5.18229	5.43637	5.3135	5.64789	5.79708
FBgn0037188	3.38634	2.69122	3.65021	1.17717	1.09589	1.14232	3.94926	2.84569	3.99943	3.45189	2.92288	3.25229	3.43175	2.96749	3.66332	3.39872	3.24385	3.46884	4.64556
FBgn0023175	6.50659	6.57432	5.97162	8.20868	7.2138	7.30074	5.88614	5.94633	5.61506	6.23943	6.26215	5.99833	6.03274	5.78157	5.60582	6.24363	6.26158	6.13459	7.56136
FBgn0023174	5.6248	5.51203	5.46739	5.95499	5.74595	5.73703	5.58627	5.39258	5.35686	5.91148	5.93704	5.76606	5.56515	5.54172	5.34773	5.88177	5.8198	5.82096	6.51903
FBgn0026417	1.86041	2.50504	1.64024	2.12357	2.01105	2.34525	2.12232	2.81552	1.78616	1.98523	2.08838	1.88693	1.72114	1.99932	1.5851	1.67106	2.00002	1.70698	2.08386
FBgn0026411	3.54657	3.27686	3.9026	0.452023	0.436878	0.645782	2.26806	2.35983	2.39219	5.90439	5.26695	5.6166	4.82351	5.14801	5.70208	6.44792	6.09946	6.37974	0.161665
FBgn0023172	5.74459	5.25695	6.09221	2.57237	3.46262	2.97715	6.53464	5.26867	6.29562	5.91807	5.37844	5.89802	6.14513	6.14254	6.33192	5.3447	4.76829	4.64792	3.47087
FBgn0027514	1.80063	1.6785	1.90297	1.07305	1.70675	1.26512	2.01584	1.93592	2.16012	2.39712	2.26009	2.36143	1.99279	2.14517	2.20051	2.52578	2.43695	2.32432	3.01369
FBgn0038829	4.52152	4.67944	4.49196	4.43212	6.10412	4.30755	4.93266	5.08559	4.77311	7.61974	7.43062	7.33812	5.18636	5.50036	5.41503	6.92129	6.84416	6.80338	3.61623
FBgn0043903	4.72733	5.36631	4.80903	2.46884	2.82242	2.96694	5.46603	5.50847	5.21096	5.27283	5.12307	5.17889	4.95437	5.84985	5.00068	5.42791	5.71475	5.40256	5.77022
FBgn0058160	4.9501	4.36847	4.93834	3.2831	4.28025	4.42231	6.12509	5.73408	6.09399	6.14915	6.10584	6.31029	5.94072	5.58767	6.12342	5.72399	5.59478	5.80872	3.06506
FBgn0021825	6.20972	6.3831	6.15137	4.68975	4.80768	5.05514	6.22762	6.2839	5.99943	5.55497	5.80393	5.50799	5.57913	6.07083	5.67822	5.52217	5.8684	5.62589	5.41451
FBgn0267378	5.9151	5.44804	5.99541	5.84851	6.07474	5.80069	6.70993	6.45594	6.59379	7.60187	7.00269	7.32653	6.69978	6.52277	6.87724	7.3928	7.21325	7.70666	6.34987
FBgn0026577	2.62953	2.19259	2.64844	1.50224	1.39474	1.09639	4.66181	2.35482	3.61985	4.24061	2.91211	3.57531	3.11221	2.94039	3.13102	3.31094	2.28263	2.17715	3.02477
FBgn0051436	4.86832	5.30954	4.74177	5.66351	4.4836	5.68751	3.41111	3.62482	3.16411	3.67289	3.75064	3.59917	3.8921	4.13199	3.90669	4.07117	4.0166	4.08903	1.44428
FBgn0051431	0.710091	0.108136	0.80876	0	0	0	2.15253	1.89666	2.21229	1.20665	0.989114	1.17428	2.61433	2.23967	2.49488	2.31157	2.25948	2.19043	0.771866
FBgn0030853	6.50847	6.43145	6.52609	7.5798	6.94851	7.53858	5.93278	5.92212	5.91864	4.9009	5.19982	4.92345	5.544	5.44923	5.62431	5.18811	5.19956	5.36589	5.73081
FBgn0030850	5.21534	5.04261	5.32528	5.63119	6.40998	6.28903	5.76504	5.6059	5.67883	6.59097	6.43214	6.31364	5.56979	5.94242	5.92034	6.00538	6.14183	6.28595	5.8559
FBgn0030851	2.44609	3.16695	2.35573	1.85584	2.97072	3.0284	2.35922	3.20972	2.45438	2.53084	2.61987	2.51542	2.35911	2.84642	2.34835	2.5867	2.75936	2.49546	2.8053
FBgn0030854	3.55952	3.41608	3.72229	1.47609	2.44979	2.27311	3.8456	3.86143	3.8771	4.58977	4.5349	4.38488	3.91448	3.78657	4.08516	4.25774	4.3009	4.25189	3.97746
FBgn0030855	2.8638	4.17495	2.92575	3.93778	4.01142	3.87212	2.79785	3.49149	2.99237	3.22552	3.40656	3.23601	2.90409	3.34085	2.56641	3.68086	3.73683	3.51131	5.80521
FBgn0030858	3.44595	3.74857	3.76883	3.23485	3.55283	3.65654	3.34482	3.35401	3.75477	4.21732	4.32355	4.33727	3.56747	3.66878	3.69682	4.58619	4.48373	4.59199	5.50706
FBgn0037184	2.31844	2.31181	2.41936	0.589313	1.55901	1.1745	2.23164	2.05516	2.41159	1.85193	1.91463	1.81004	2.4764	2.41987	2.32594	1.79804	1.98163	1.78539	2.90978
FBgn0267803	2.03857	2.59844	2.65985	1.95385	2.17334	2.70538	2.87576	2.41883	3.0601	1.56104	1.88296	1.52914	2.60299	2.40161	2.37446	3.57593	2.58965	3.48417	2.57107
FBgn0085279	4.03009	4.01023	3.51587	3.41965	3.14944	3.2606	4.08447	3.8135	3.41387	2.82213	2.8847	2.30826	3.16714	2.98614	2.83789	2.60896	2.76195	2.40938	2.05755
FBgn0085273	3.5235	3.93634	2.62063	0	0.381273	0	0.276622	0.731831	0.446758	0.187618	0.592518	0.187449	1.89376	2.098	0.935304	0.471424	0.498611	0.267497	0
FBgn0085271	4.89496	4.83686	4.54718	5.39902	4.82282	4.96235	4.46897	4.70629	4.18931	3.68224	3.96205	3.59884	4.14764	4.05969	3.93399	3.83379	4.01296	3.81957	1.5387
FBgn0032728	2.2755	1.97726	2.27248	1.08256	1.36526	0.83972	2.71582	2.47496	2.67424	2.75549	2.46337	2.64735	2.13634	2.16247	2.32682	2.92353	2.65382	2.20693	1.27662
FBgn0032729	4.19257	3.97122	4.36064	6.64208	6.19533	6.47068	4.40607	4.26156	4.73548	3.79479	4.01892	4.01697	3.74693	3.77365	3.99568	3.65343	3.66974	3.98492	3.55642
FBgn0032723	1.42396	1.33695	1.2427	0.637301	0.492464	0.170598	2.68856	1.58062	1.90002	1.87503	1.03815	1.43801	1.57866	1.6721	1.33685	1.29303	0.834892	0.743729	1.60499
FBgn0032720	3.62602	3.70554	3.68928	3.13389	3.53448	3.82888	3.72306	3.90412	3.84778	2.60126	2.73743	2.68383	3.32679	3.37848	3.27751	2.54001	2.60664	2.68474	3.38807
FBgn0032721	5.42857	5.78738	5.64492	3.77319	4.41973	4.16965	5.27551	5.17859	5.45955	5.58024	5.71611	5.55397	5.26611	5.56222	5.16784	5.47972	5.4479	5.8997	5.55933
FBgn0032726	4.31425	4.50945	4.52207	9.8386	8.99641	9.58624	4.62887	5.29584	5.04546	5.42291	5.75155	6.25959	5.58585	5.53622	5.88852	5.00049	4.67548	5.78263	4.7313
FBgn0032727	5.78401	4.69921	5.63784	5.31458	4.20274	4.00013	6.27155	5.10538	5.91851	6.03364	5.60478	5.75517	5.01195	4.24551	5.09342	6.37904	4.2823	6.20748	4.67151
FBgn0032724	2.33821	2.62149	2.57498	1.89501	2.66877	2.66249	2.50114	2.55784	2.58887	2.5189	2.54412	2.72382	2.53889	2.40803	2.41108	2.404	2.54009	2.44576	3.84786
FBgn0032725	4.38453	4.08824	4.26448	4.20919	4.09254	4.43534	4.71605	4.87105	4.26243	4.22897	4.24346	3.97556	4.37139	4.2745	4.20339	4.25879	4.35486	3.96735	3.01255
FBgn0286051	3.08128	4.22115	3.0922	3.73986	4.42318	4.30051	3.19806	4.17045	3.37564	3.72014	3.85751	3.77415	3.28049	3.89819	3.35796	4.31301	4.19357	4.26615	4.59642
FBgn0023545	4.10609	4.29373	4.0613	4.58778	4.28691	4.42136	3.87268	4.02027	3.94783	4.52917	4.93117	4.62425	4.4005	4.4142	4.47631	4.83063	4.73108	4.88233	4.63636
FBgn0023540	6.52264	7.26787	6.11384	0.624331	1.07101	0.576083	5.39391	5.03498	4.74315	2.86056	3.41576	2.33098	5.23882	5.73521	4.84365	2.36579	2.17294	1.53736	3.88653
FBgn0023542	4.54585	5.2694	4.51243	6.81479	6.53732	6.38632	4.4644	5.00969	4.53829	4.7239	4.82805	4.71476	4.47298	4.8114	4.4841	5.26051	4.95988	5.01538	5.1249
FBgn0025615	6.11949	5.85356	5.71913	6.29886	6.40129	7.05864	5.92487	5.72248	5.66395	6.31634	6.65784	6.35496	5.99623	5.91033	5.94956	6.54363	6.22895	6.37011	6.15993
FBgn0053155	6.38012	6.74004	6.06646	7.28556	6.87289	7.31852	6.14508	6.45314	5.59383	5.28027	5.43642	5.08506	5.87027	6.07442	5.6553	5.47213	5.55136	5.28494	6.14898
FBgn0053156	3.24803	3.58251	3.24374	3.1232	3.11962	3.07679	2.82252	3.207	3.30984	2.20464	2.64284	2.29785	3.98923	3.64636	3.28397	2.58655	2.80395	2.59298	5.71163
FBgn0053158	3.41844	3.88907	3.2212	2.91501	3.08749	2.81371	2.54735	2.70444	2.54738	2.87254	2.88603	2.83777	5.43643	5.22104	5.5283	3.30148	2.97303	3.28515	4.38815
FBgn0053159	0.0774154	0.0258953	0.0324618	0.256309	0	0.173124	0.202665	0.151622	0.126202	0.229109	0.322855	0.183611	0.0534868	0.216784	0.160606	3.15731	3.19325	3.06899	0.0259559
FBgn0086384	3.93913	3.46492	4.30773	2.14643	3.56834	3.14928	4.08102	3.54231	4.06979	4.07942	3.85666	4.09823	4.00211	3.7521	4.21943	4.16757	4.08907	4.16824	4.66297
FBgn0001208	4.24739	3.82503	4.15625	8.34567	8.13994	8.55781	4.44448	5.09136	4.95612	5.50062	5.65119	6.16743	5.51856	5.2213	5.79943	5.00106	4.3644	5.42237	4.37895
FBgn0040942	1.21014	0.609296	0.924252	3.72351	4.23458	4.54548	1.99483	2.15116	1.57389	2.1259	2.27089	2.24223	3.16262	2.79773	3.06305	1.8919	1.61693	1.89897	0.836789
FBgn0262126	4.4655	4.64638	4.49773	3.77149	6.13873	4.45979	5.05994	5.1743	5.06493	7.57207	7.27592	7.34585	5.29249	6.08708	5.64768	6.99285	7.68229	7.25393	4.84196
FBgn0033032	5.79156	5.85497	5.89202	1.50224	2.11345	2.09731	6.40808	6.07038	6.23582	6.01389	6.07017	6.0221	6.08337	6.33061	6.15203	5.58044	5.615	5.23926	2.93468
FBgn0042132	3.46346	3.45692	3.64659	2.10123	3.02664	2.67652	4.34257	4.20861	4.36307	3.46876	3.45675	3.43594	3.60972	3.6207	3.76189	3.44682	3.50768	3.61388	3.72066
FBgn0042134	5.17283	4.99427	5.27839	4.01914	4.35485	3.57588	5.73653	5.32168	5.73727	6.25533	5.80596	6.38924	5.60547	5.58888	5.82763	6.06362	5.66798	5.62588	6.44711
FBgn0042135	7.60345	7.12967	7.79175	2.15547	3.01518	2.91302	8.03589	7.40547	7.7062	5.70008	5.2228	5.5178	7.26482	7.01809	7.32849	5.91307	5.45038	5.83664	4.71493
FBgn0042641	4.19248	3.94172	4.41369	4.54877	4.86278	4.87338	4.4282	4.24216	4.51154	4.10958	4.12089	4.05329	4.9175	4.7296	4.89073	4.6024	4.32432	4.52151	4.39139
FBgn0042138	5.95997	5.78242	5.88111	5.67075	6.29964	6.5187	6.10287	5.92886	5.9881	5.66487	5.69425	5.62159	5.45364	5.49009	5.57765	5.5069	5.56184	5.7425	5.15574
FBgn0053481	2.20201	1.903	1.96186	0	0	0	1.69659	1.36667	1.39774	0.036782	0.21764	0	1.98254	1.31101	1.42259	0.175098	0	0.0895693	0
FBgn0053487	2.61415	3.12815	2.41697	3.26506	2.86518	2.86753	2.42391	2.5265	2.23106	1.54545	1.92039	1.58997	1.89874	2.3984	2.00115	1.74329	2.24961	1.75437	1.74627
FBgn0264922	6.11152	5.7385	6.01326	4.46524	5.68587	5.21924	6.5266	6.7917	6.31247	6.36244	6.15175	6.28142	6.38806	6.30537	6.4749	6.27433	6.10931	6.00309	5.2864
FBgn0035983	3.03345	3.22943	3.03019	2.19972	2.11633	2.08815	3.43446	2.93149	3.25083	3.63865	3.18986	3.67379	3.84237	3.90021	3.97203	3.82737	3.28258	4.08312	3.72383
FBgn0035982	4.36866	5.92089	4.19831	0.643742	0.847257	0.485384	0.675557	1.72869	1.15146	0.825668	1.89209	0.76442	1.22935	2.85083	1.2646	0.532514	2.15903	0.437717	5.20075
FBgn0035981	4.83471	4.09143	5.00915	5.53638	4.84867	5.28895	5.07496	4.40174	4.97576	5.21835	5.11267	5.18851	4.97776	4.4931	5.11174	6.3277	5.87372	6.3005	4.72781
FBgn0035980	2.46537	2.32305	2.33752	2.42779	2.89048	2.83748	2.55965	2.69751	2.39803	2.04316	2.21028	1.89229	2.31669	2.26243	2.13592	1.72296	2.09333	1.92875	2.59544
FBgn0035987	4.40967	4.59556	4.61604	4.26916	4.49492	4.77579	4.64001	4.7843	4.74654	4.96209	5.05792	5.01659	4.57993	4.64385	4.58587	5.39901	5.41461	5.54475	6.69218
FBgn0024250	2.62894	2.23589	2.64756	0.256309	0.220985	0.0749816	2.2377	1.26104	1.73058	2.41161	1.91105	2.41189	2.27603	2.44245	2.44184	2.44602	1.54151	1.71992	0.26304
FBgn0035985	8.08636	8.98089	8.23472	0.894191	2.11279	1.42836	7.99678	7.54052	7.79486	3.94707	4.65204	3.55563	8.63955	8.53824	8.80654	4.29468	3.94961	3.65517	2.26479
FBgn0020018	3.68347	3.79444	3.7207	4.9239	4.7478	4.88468	3.301	3.45076	3.49739	3.46023	3.76514	3.62253	3.52509	3.58869	3.60908	3.87729	3.82647	4.00047	4.86139
FBgn0028377	1.65866	1.34884	1.74237	2.60388	0.853633	1.24882	1.45311	1.69975	1.92236	0.660608	0.745336	1.12177	1.34195	0.881294	1.61245	1.21943	0.962118	0.943292	1.20829
FBgn0028375	3.12214	2.90166	3.17048	0.548702	2.1258	1.22455	3.40172	3.2244	3.3726	3.33129	2.97613	3.07513	3.17541	3.23961	3.43947	3.44426	3.40391	3.31377	3.37629
FBgn0028372	2.41051	2.09421	2.37886	0	0.933638	0.929354	2.6317	2.36969	2.41476	2.20228	2.0869	2.14332	2.42935	2.26542	2.43218	2.36085	2.32606	2.5047	2.56655
FBgn0028371	7.58202	7.96642	7.86764	2.05381	2.85394	2.53041	7.46518	7.7291	7.44808	6.67466	6.69271	6.5218	6.92783	7.81794	7.24352	6.98939	7.06373	6.92887	4.20535
FBgn0034976	1.99632	1.50677	2.27141	0.683744	0.792388	0.498029	3.59162	1.94885	3.26942	2.71203	1.93771	2.46032	2.35905	2.27264	2.48354	2.31443	1.763	1.59875	2.28056
FBgn0039229	4.30493	4.25309	4.8491	3.08947	4.05095	3.74559	5.22296	4.68591	5.25264	5.03512	5.04305	5.05144	4.73024	5.12923	5.11207	5.34975	5.32183	5.48383	5.40847
FBgn0022709	7.90862	7.90966	7.72113	6.15598	5.95693	5.8833	8.04217	8.57863	7.79831	4.33409	4.39539	4.11892	6.56007	6.50219	6.65717	4.6439	4.81458	4.97871	4.36483
FBgn0032230	5.42227	5.00698	5.31514	0.256309	0.457275	0.149848	3.24125	2.71383	2.72286	4.08587	3.91872	3.68666	5.32187	5.14589	5.40155	4.09623	3.88249	3.8638	0.0753559
FBgn0035181	4.66403	4.98564	4.6408	4.89479	5.0533	5.4058	4.47267	4.56261	4.39277	4.73728	4.87103	4.67999	4.35902	4.43601	4.4269	4.5891	4.81213	4.80444	4.67043
FBgn0032231	4.91009	4.91875	4.65042	5.29551	4.4499	4.91746	4.17821	4.28285	3.89729	3.90576	3.86567	3.73695	4.39241	4.26714	4.20356	3.90853	4.04368	3.96169	4.86386
FBgn0035189	4.60004	4.32157	4.71661	8.95332	8.36528	9.33919	4.22744	4.50533	4.66784	4.0144	4.58571	5.44423	5.23	5.025	5.52365	3.69479	3.60653	4.99811	4.65144
FBgn0038930	4.19435	4.33295	3.55476	6.71396	7.20853	7.20244	3.33892	4.4528	3.27892	4.229	4.79479	4.22503	3.92762	4.30725	3.86974	3.62377	3.96066	4.00015	2.06795
FBgn0052687	4.01848	4.28569	4.24607	8.17372	8.37068	8.22048	5.87818	6.03713	6.11792	5.08725	6.07004	6.16835	5.44398	5.6686	5.64632	4.94898	4.89271	5.29714	3.86213
FBgn0052685	4.66126	4.34967	4.98684	3.54483	4.28542	4.3895	5.09288	4.47613	5.16308	5.31742	4.96699	5.34752	4.53119	4.73746	4.85193	5.37109	5.53717	5.70813	6.03974
FBgn0087039	3.01468	2.44425	2.86949	2.2851	2.61999	2.11786	3.5634	3.27051	3.11348	3.01028	2.64554	2.79915	3.22208	2.90354	2.98228	2.7086	2.62466	2.12289	1.95595
FBgn0085188	6.04293	5.63377	5.70833	6.05718	5.61336	6.43968	6.10601	6.05853	5.69324	5.41391	5.20161	5.21691	5.70313	5.53038	5.47805	5.32281	5.55896	5.29549	5.71639
FBgn0087035	7.0486	6.72594	7.00368	5.91196	6.80461	5.90136	7.75257	7.19121	7.55711	7.74988	7.3454	7.60215	7.30253	7.309	7.4844	7.66681	7.66888	7.53	5.69007
FBgn0031703	3.30749	2.57021	3.49334	4.89027	5.10273	5.50008	3.61067	3.1102	3.71579	4.00886	4.27663	3.669	3.43601	3.4775	3.43788	4.26123	4.40167	4.30675	3.42961
FBgn0039955	5.16037	4.75641	5.1147	3.92313	4.14396	3.41104	5.67074	5.27806	5.47274	5.27143	4.86149	5.07417	5.45173	5.19948	5.46444	4.95716	4.57357	4.34636	3.38649
FBgn0031250	4.14773	4.04584	4.22655	6.46816	5.95136	7.13222	4.44311	4.38923	4.59236	5.38427	5.5695	5.57694	4.56199	4.44452	4.7871	5.41662	5.4638	5.5374	4.95851
FBgn0259967	0.0149122	0	0.0318479	0.0811299	0	0.0994863	0.0306022	0.0215348	0.0229607	2.97031	2.79233	2.92394	0.065054	0.0539062	0.0153326	0.0328532	0.0922736	0.0134255	0.0259559
FBgn0001978	4.23901	5.17833	4.28488	4.55166	4.84136	4.59957	4.42332	4.74921	4.5656	5.14563	5.01592	4.9891	4.29912	4.79736	4.35261	5.19776	5.28915	5.25633	7.46453
FBgn0033421	4.04381	4.70062	4.1238	4.78973	5.07233	5.09537	4.23083	4.50783	4.28192	4.81306	5.04944	4.79012	4.26577	4.42283	4.41759	5.41408	5.19187	5.30322	3.70214
FBgn0036106	8.8747	9.032	7.78652	2.30086	2.38113	1.64345	8.43707	7.55865	6.55365	5.12828	5.08825	4.0825	5.9234	5.47344	5.44114	4.2915	3.95391	3.80291	5.46173
FBgn0033427	1.85844	1.92157	1.79355	1.59365	1.30324	1.38352	1.81996	1.7774	1.99425	2.10008	2.26312	2.12303	1.96703	1.97026	1.9318	2.29104	2.22176	2.26624	3.33347
FBgn0036988	2.89687	2.56552	3.06931	1.98462	2.84114	2.71875	3.55172	2.84481	3.54373	3.67884	3.4354	3.80226	3.5152	3.46574	3.67042	3.72249	3.6535	3.80918	2.5052
FBgn0052428	5.37912	5.03269	5.59203	2.90659	3.53425	3.31244	4.65668	4.52002	4.71237	5.52783	5.5592	5.73612	4.33921	4.14436	4.57245	5.19622	4.75359	5.25495	4.7221
FBgn0085223	0.110573	0.16227	0.0385822	0.230865	0	0	0	0	0.0666231	0.176673	0	0	3.20096	3.11402	3.44974	0	0	0.0586423	0.385847
FBgn0052350	3.22682	2.67175	2.87241	3.08865	2.72295	2.45021	3.63622	2.9483	3.0887	3.42729	2.84296	3.08018	3.15488	2.61284	2.6217	3.2628	2.45504	2.07055	2.08867
FBgn0036980	3.96356	3.36664	4.23622	4.13767	4.07751	4.60771	4.56793	3.64511	4.62792	4.69919	4.37317	4.66865	4.10758	3.86964	4.29291	5.13615	4.82572	4.8747	5.42036
FBgn0052354	1.88517	1.35538	2.23371	0.256309	0.0946517	0.494646	1.45277	1.13281	1.27379	1.12378	0.760645	0.867596	2.53067	2.28635	2.90627	1.21483	0.887043	1.13114	0.751331
FBgn0052425	5.60537	5.96598	5.96469	8.16774	8.79735	8.11543	5.32241	5.92932	5.40531	5.67778	6.31762	5.78119	5.9076	6.3555	5.92631	5.49741	5.66489	5.68099	6.80975
FBgn0036985	2.12404	1.68649	2.69639	0	0	0.0760569	2.66592	0.339553	2.08159	0.577595	0.324836	0.466377	0.220019	0.509172	0.65676	1.42914	0.568108	0.551736	0
FBgn0028953	4.01557	3.37684	4.19983	2.24622	2.40632	1.37393	5.11274	3.61763	4.58091	4.3377	3.49638	3.89487	4.45082	4.15242	4.44814	3.60196	3.0474	2.61132	4.45921
FBgn0265180	8.8003	8.05521	8.33182	1.53834	2.10747	1.5322	8.87709	8.07154	8.2146	5.86168	5.29005	4.90832	8.32052	7.94099	7.44266	4.91171	4.28688	3.47886	1.35037
FBgn0266322	3.24509	2.92151	3.5067	4.54374	3.92699	4.25483	3.49755	3.16624	3.51852	3.24563	3.33712	3.34145	3.32392	3.13605	3.44705	3.358	2.90026	3.19949	1.59185
FBgn0265189	3.03214	3.45926	3.12624	2.85444	3.53895	3.73248	2.69965	3.21455	3.06715	2.62791	3.11015	2.76499	2.87213	2.97192	2.95833	3.16653	3.1069	3.33827	5.06537
FBgn0025620	3.24571	4.22022	3.39422	8.72809	8.66408	8.86359	3.64077	4.91712	4.0146	4.78448	5.62295	5.21886	4.57695	5.19387	4.72493	4.23165	4.67477	4.82065	4.35322
FBgn0032401	1.36232	0.839123	1.40882	0.99649	0.834943	0.582971	1.63087	1.21173	1.55977	1.16466	1.24511	1.47605	1.25182	1.03386	1.25931	1.12613	1.14454	0.931759	0.588101
FBgn0026620	5.62976	5.29524	5.67348	2.84469	3.1934	2.48896	6.28332	6.1015	5.86766	5.72842	5.24512	5.77558	6.09058	6.02138	6.04185	5.88705	5.61861	5.59746	3.95842
FBgn0035853	5.34812	5.41416	5.29271	5.14876	5.18702	5.60087	5.28584	5.53669	5.09462	5.23136	5.17125	5.17905	5.24712	5.2611	5.06852	5.31919	5.43993	5.27444	5.50032
FBgn0000499	4.45947	4.53644	4.67359	3.85161	3.33395	3.73552	4.23558	4.34559	4.46178	4.24837	4.09924	4.26855	4.18798	4.25015	4.3192	4.21258	4.44456	4.52348	6.62047
FBgn0030073	2.56821	2.82956	2.15353	7.91755	7.32264	7.37285	2.93021	3.79233	2.5908	4.59797	4.74465	4.19952	3.44583	3.64586	3.02456	4.70772	5.17624	4.76269	3.03931
FBgn0036288	3.75076	3.52151	3.99024	4.08099	4.32974	4.91443	4.11002	4.03207	4.00736	4.76143	5.03836	4.86416	3.51614	3.63045	3.72869	3.62066	4.54117	4.03943	2.38278
FBgn0000490	3.23699	2.7032	3.3633	1.81755	1.73987	1.48773	4.59152	3.62346	3.97029	4.16199	3.24874	3.75615	4.79569	3.95501	5.18895	2.62231	1.84568	1.74578	0.616127
FBgn0000492	0.388868	0.545695	0.664333	2.71241	3.36686	3.31049	0.919058	1.33951	0.971441	1.2893	1.43074	1.72546	1.20491	1.26123	1.18818	0.850233	0.900316	1.05572	0.624604
FBgn0030077	2.4165	1.8302	3.02116	0	0	0	4.1833	2.71252	4.48231	0.578185	0.426886	0.613602	1.66859	0.741447	1.68597	1.25528	1.31155	0.977033	1.56135
FBgn0039187	4.55001	4.51034	4.8338	3.14564	3.66459	3.26786	4.55615	4.02368	4.70233	4.60534	4.35158	4.50773	4.29476	4.32277	4.49734	5.02683	4.88778	5.38874	5.138
FBgn0039186	3.47708	3.25458	3.44595	2.08712	3.01612	2.67033	4.36541	3.63099	4.17065	3.98862	3.65511	4.10095	3.67449	3.58443	3.65846	3.93087	4.19761	4.11669	5.51231
FBgn0039183	2.57806	3.76737	2.71085	4.42853	4.41723	4.20215	2.55898	3.16703	2.76718	3.87744	3.89091	3.88591	3.05567	3.41177	3.03196	4.08145	4.02624	4.08488	6.08575
FBgn0039182	2.44097	3.59937	2.43997	2.03111	3.43689	2.39171	3.00574	3.6635	3.08928	3.60628	3.51675	3.78112	2.90725	3.50336	2.99861	3.81127	3.58593	3.51266	4.79749
FBgn0034162	6.44136	7.34809	6.04997	8.45074	8.43801	8.61249	5.87985	7.07243	5.66237	6.52643	7.72625	6.49553	6.747	7.37017	6.59941	11.3449	12.0152	11.0396	3.08434
FBgn0031403	1.737	1.77385	1.61705	0.93316	1.82002	1.83865	1.74019	1.8706	2.06611	2.14331	2.03953	1.70401	2.1923	1.47663	1.50119	1.88422	1.88522	1.93102	2.2233
FBgn0031401	6.79894	6.63932	7.34501	1.93658	3.53498	2.74603	6.0664	6.00839	5.97096	4.71367	4.65011	4.82788	6.23997	6.36003	6.44267	4.79557	4.56953	4.69517	3.79034
FBgn0039188	3.16124	3.14654	3.37637	2.28034	2.37577	2.39855	3.4086	3.31234	3.57163	4.65914	4.53102	4.40896	3.48427	3.52638	3.6808	4.08716	4.16157	4.16366	3.76575
FBgn0267586	1.22634	0.415323	1.15626	0	0.0462448	0.0254293	2.13809	1.15772	2.07992	0.129015	0.135732	0.250778	0.314081	0.262355	0.312133	0.0629945	0.105372	0.0857044	0.0150606
FBgn0267587	1.27653	0.999505	1.02106	2.49801	1.52608	1.95692	1.04471	0.70895	1.03015	1.11919	1.07236	0.993732	1.76121	1.60161	1.45177	1.60597	1.57393	1.46275	0.178753
FBgn0031077	2.67287	3.44059	2.53723	3.75504	3.73256	3.4388	2.08288	2.68722	2.32586	3.49753	3.85343	3.52397	2.50888	3.04158	2.696	3.8676	4.06489	4.01641	4.12682
FBgn0025820	4.62565	4.78808	4.11995	4.75956	4.12754	4.28465	3.60406	3.7838	3.16629	2.87771	3.33172	2.84047	3.65645	3.85549	3.2404	3.14701	3.21462	3.06262	3.96396
FBgn0032397	2.42353	3.09405	2.59326	2.08401	2.99607	3.04001	2.84267	3.20897	3.10726	2.90223	3.03372	2.91649	2.78681	3.18877	2.65323	3.07778	3.11115	3.1899	4.2032
FBgn0025827	7.19837	7.28041	7.2912	2.61222	2.13742	2.31068	1.55046	2.17885	2.66346	2.1658	2.36409	1.83614	2.89048	2.71742	2.90051	5.52592	5.68132	4.53449	1.90337
FBgn0039459	1.74324	1.94522	1.82947	1.40726	1.89207	1.77287	1.4935	1.75778	1.8534	1.87206	1.82183	1.74178	1.88855	1.71549	1.58413	2.10108	2.1588	2.05544	4.58042
FBgn0033808	2.72512	2.97461	2.55177	3.60475	3.77598	3.83609	2.13356	2.5317	2.25221	1.57494	1.85254	1.73102	2.48154	2.40718	2.08678	1.97771	1.96403	1.94409	2.86614
FBgn0033809	3.98811	4.48716	3.04546	1.56339	2.00247	1.95329	0.570391	0.602613	0.903787	0.655273	1.0525	0.582383	1.59979	1.58095	1.47497	1.04514	1.04294	0.74458	1.58622
FBgn0039451	3.9439	4.00895	4.30461	2.72556	3.4414	3.71552	4.35499	4.17222	4.71292	3.93091	3.84842	3.94861	3.88088	4.0209	4.09534	4.33302	4.48205	4.57373	6.22045
FBgn0039450	3.79865	4.05818	3.83665	3.49444	4.67438	4.12615	4.02358	4.07934	4.14555	6.34821	6.29079	6.11552	4.23697	4.70137	4.41603	5.80005	6.10856	5.99802	4.53866
FBgn0033802	2.45713	2.03373	2.84804	1.0873	1.61674	1.47115	3.80835	2.61993	3.78462	3.93371	2.89601	3.20329	3.1078	2.62611	3.7595	3.38012	3.17939	3.42998	3.34947
FBgn0034299	1.88758	1.79303	1.67572	3.10004	3.05324	2.98719	1.8102	2.16536	2.26048	2.40145	2.66885	2.53355	2.4169	1.59472	1.36628	3.25953	2.86822	3.10858	4.02706
FBgn0031664	2.57122	2.97087	2.67075	2.07689	2.44628	2.72972	2.44587	2.70449	2.75332	2.79569	3.18804	2.85642	2.83981	2.78834	2.71393	2.97161	3.34255	3.27853	5.33838
FBgn0034290	4.19762	3.98209	3.74985	8.43829	8.67171	8.7048	4.15567	4.59357	3.8115	4.77477	5.29736	4.67774	4.56648	4.82177	4.35961	4.32495	4.371	4.20211	3.49296
FBgn0031660	5.31032	5.44993	5.22273	6.51638	6.14985	6.38108	5.32005	5.27731	5.12894	4.50144	4.76383	4.3943	4.58324	4.62788	4.56654	4.6425	4.78785	4.7632	5.03515
FBgn0061360	2.81996	3.05417	2.69879	2.57173	2.78492	2.27047	3.14245	3.33199	3.03864	3.20424	2.7415	3.20914	2.61775	2.75216	2.51369	2.94856	2.83714	2.77093	3.24869
FBgn0061361	2.92486	4.32724	2.90777	3.96885	4.18308	3.96292	2.65237	3.65806	2.77658	2.94438	3.27344	2.5699	2.82961	3.62925	2.75691	3.13721	3.30831	3.21732	4.8283
FBgn0014018	5.81396	5.86386	5.69447	4.10351	5.45063	3.78588	6.89354	7.12493	6.49919	6.90849	6.57214	7.00318	7.84068	8.11168	8.11505	6.59609	6.60388	6.42763	3.51706
FBgn0030137	2.332	2.64723	2.36089	2.12357	2.51484	2.54714	2.28571	2.49095	2.10517	2.20331	2.38934	1.966	2.47883	2.47516	2.03408	1.96259	2.34531	1.77252	2.18252
FBgn0030136	10.563	10.483	10.1323	12.7195	12.2481	12.2632	10.1756	10.2207	9.60225	11.0075	11.1099	10.8544	10.1266	9.91917	9.93687	10.6007	10.3978	10.7202	8.32841
FBgn0014010	7.08859	6.61396	7.04116	5.94489	6.1867	6.1429	7.66553	7.10855	7.2694	7.17221	6.63774	6.95257	7.12666	6.87324	7.21491	6.98068	6.79541	6.6429	5.01609
FBgn0014011	4.59944	4.01297	4.78184	1.38701	1.81675	1.34365	5.77223	5.38949	5.28499	4.36345	3.71978	4.76188	5.47492	5.39278	5.43695	4.21921	3.73732	3.26455	1.68491
FBgn0266762	0.918696	0.624175	0.885717	0.247878	0.534126	0.427023	1.55649	1.35276	1.51915	1.57557	1.53284	1.60819	1.5002	1.19409	1.56573	1.20142	1.23066	1.32371	0.298065
FBgn0038250	3.21182	4.47737	3.40663	4.92357	5.07767	4.98124	2.76899	3.07513	2.55306	1.89116	2.6564	2.29484	4.78918	5.31779	5.11182	2.81121	2.94455	2.93303	1.57239
FBgn0003175	3.61346	2.92571	4.15975	1.75367	3.09547	3.39123	4.24134	2.88332	4.24344	4.96151	4.05992	4.59881	3.93739	4.21798	4.43642	4.42048	4.06526	4.53295	4.13987
FBgn0038972	6.02826	6.73312	5.83025	8.38978	7.68539	7.44356	5.93926	6.21608	5.64982	5.2253	5.54932	5.18931	5.52269	5.88097	5.49886	5.2356	5.36601	5.29312	5.02705
FBgn0036580	7.13692	6.75583	6.91108	5.07581	4.72553	4.93106	6.37845	6.44269	6.29753	4.5158	4.62235	4.32714	6.68283	6.4628	6.55041	4.67768	4.60798	4.53786	4.53
FBgn0250816	0.869319	0.505821	0.426085	1.69809	0.717365	1.2498	0.931143	0.884244	1.29289	0.692222	0.205499	0.139739	1.91989	1.25721	1.14444	0.550639	0.295911	0.0627097	2.37975
FBgn0050115	3.68628	3.30253	4.16167	1.37545	1.32982	0.699599	4.67416	3.95343	4.43602	4.66607	3.85546	4.59515	4.7498	4.38396	5.07288	3.68734	3.57861	3.58295	1.92369
FBgn0050441	1.09034	0.614959	0.466157	1.12287	0.809994	0.739141	0.609486	0.350336	0.415063	0.338443	0.337368	0.417883	1.84721	1.16718	1.50873	0.397367	0.399251	0.157519	0.288682
FBgn0050440	4.07736	3.1456	4.09492	0	0	0	2.82134	2.24877	2.88365	1.83015	1.39167	1.69897	3.4084	2.83559	3.26148	2.2549	1.08741	1.13792	0.636529
FBgn0027280	5.64067	5.13925	5.69579	5.96239	5.868	6.15373	6.33828	5.71515	6.25163	5.16818	4.90681	5.11235	5.74065	5.47357	5.79962	5.40151	5.3603	5.32608	6.29085
FBgn0027287	6.88292	6.77354	7.18057	4.42076	4.53315	4.88201	7.69905	7.43028	7.79991	9.43053	9.50143	9.44019	8.07588	7.74683	8.40941	9.1261	9.13687	9.32189	5.94029
FBgn0036298	3.93662	4.4682	3.51812	4.73748	5.22429	4.93622	3.6486	4.25303	3.68479	4.49489	4.7754	4.32615	3.48716	3.84633	3.28835	4.68005	5.05647	4.78976	6.07517
FBgn0036299	5.09568	5.57632	5.21381	1.36769	2.32902	2.04562	5.42091	5.25136	5.46181	5.4554	5.71973	5.76262	4.67297	5.52108	4.8384	5.38225	5.85043	5.24845	4.98877
FBgn0038976	6.23243	7.30772	5.54763	6.56735	6.35375	6.3573	5.58301	6.26817	5.03589	5.35911	5.62308	5.01257	5.77893	6.21852	5.06816	5.48588	5.82995	5.21215	5.96906
FBgn0036292	2.64721	2.7748	2.47522	3.04203	2.89875	2.60274	2.40903	2.51153	2.36713	2.90019	3.13352	2.84462	2.53598	2.68102	2.51809	2.8974	3.05997	2.9203	3.18174
FBgn0036290	4.65136	5.19673	4.45404	4.30798	4.36405	4.36821	4.65698	4.57154	4.37594	3.95134	4.3053	4.31822	5.24827	5.10974	5.21917	4.57547	4.6146	4.7165	4.96478
FBgn0036291	2.09527	1.8535	1.92751	1.32299	1.38595	2.25457	2.2171	2.10566	1.982	2.03461	1.90801	1.60251	2.06645	1.9977	2.08831	1.78334	1.9513	1.67874	1.52982
FBgn0030745	5.96382	5.48154	6.16057	0.637301	1.04474	1.5121	5.38853	4.71893	5.43523	3.66876	3.48676	3.44499	5.4422	4.79467	5.28654	4.25442	4.11488	4.25136	2.71613
FBgn0002773	13.3282	12.8207	12.2156	7.81995	7.12639	6.76435	11.7505	11.4723	10.9977	9.22454	8.83801	8.31795	11.7661	11.3078	10.7446	8.72342	8.08906	7.85176	6.33471
FBgn0039907	4.50934	4.0944	4.85265	2.97354	3.14228	2.54013	5.55719	4.61266	5.42568	4.86406	4.19989	4.6334	4.5537	4.47608	4.97399	4.66036	4.23389	4.17251	3.52092
FBgn0024912	3.84397	4.14565	3.36274	5.05793	4.76261	4.4492	3.68163	3.47995	3.30192	4.36383	3.99821	3.92208	3.62651	3.1433	3.39191	3.76469	3.82111	3.34131	2.78545
FBgn0038320	4.81627	5.01601	5.09156	4.37271	4.49912	4.01146	5.34657	5.03288	5.41901	5.65608	5.54476	5.64481	5.31918	5.5114	5.44161	5.78933	5.88984	5.78897	5.68867
FBgn0038321	3.76494	4.96572	4.05275	3.43494	4.25987	3.94718	1.75042	2.70711	2.2797	5.08968	5.72524	4.83112	2.06642	2.38273	2.21879	3.68298	4.00089	3.71175	3.26404
FBgn0038324	1.25891	1.21621	1.39768	0.637301	1.01563	1.00905	1.18967	0.922984	1.56832	1.17141	0.929752	1.02541	1.65241	1.78652	1.68258	1.16665	1.24088	1.29332	2.2186
FBgn0038325	3.48259	3.24435	3.75511	3.50066	3.23443	3.57977	3.87822	3.41973	3.93326	4.28377	4.01411	3.92007	3.6963	3.59968	3.61989	3.94168	4.03002	4.02216	4.98124
FBgn0038326	4.83969	4.40446	4.81595	6.15142	5.92531	6.58894	4.51996	4.29541	4.67431	3.73777	3.69703	3.74047	4.48693	4.25375	4.39204	4.38936	4.26258	4.28067	5.3651
FBgn0038327	3.45544	3.2268	3.35308	2.98618	2.86701	3.37463	3.68695	3.64018	3.46641	3.67204	3.76434	3.52302	3.53695	3.43138	3.6128	3.48732	3.46725	3.37235	3.13829
FBgn0035407	2.01978	2.42849	2.06141	1.14575	1.41753	1.27664	1.84829	2.26477	2.09864	2.03702	2.32005	2.10282	2.51797	2.69485	2.48447	2.41563	2.26382	2.32724	3.11617
FBgn0035402	4.71741	4.95482	4.57677	5.42568	5.14256	5.50539	4.26981	4.4111	4.41196	5.03976	5.24373	5.14766	4.56959	4.63522	4.38676	5.23788	5.33406	5.44843	7.06
FBgn0052645	2.0457	1.10022	2.56593	0.511775	0.560376	0.604479	0.994354	0.339553	1.00094	1.13776	1.14641	1.00846	1.7902	1.7283	1.9615	0.882465	0.503689	0.681966	1.60822
FBgn0035400	6.36025	6.40974	6.45719	2.54403	3.46583	3.04818	5.23849	5.42646	5.27369	7.29111	6.87765	7.08293	5.63037	6.15798	5.86526	6.23912	6.68879	6.60799	5.25802
FBgn0035401	4.5256	4.79388	4.15175	5.77753	5.69267	5.37249	4.88044	5.06039	4.641	6.41961	6.34128	5.78543	4.79543	4.91354	4.76107	5.5459	5.89745	5.81967	4.62631
FBgn0033113	1.45191	1.93159	1.36555	1.32575	1.23888	1.55423	2.77627	3.25384	1.96097	3.96968	4.18216	4.26612	2.1687	2.87579	2.33184	5.33248	5.07584	5.39669	0.740858
FBgn0033117	2.75454	2.92561	2.61606	2.97354	3.13007	2.95564	2.91151	3.02098	2.93617	3.28601	3.44576	3.02986	2.96791	2.96322	2.94918	3.14387	3.20926	3.15901	3.22167
FBgn0002778	2.85081	2.31972	3.17752	5.38397	6.10681	5.8195	3.11773	3.54886	3.14943	4.97499	5.02261	4.97018	3.86155	4.19934	3.84629	4.66986	4.51081	4.52666	4.71383
FBgn0040529	8.18942	7.57374	8.05346	7.88106	8.30844	8.34405	8.74611	8.47547	8.37149	7.31728	7.14834	7.19306	7.7955	7.52754	7.83169	7.12206	7.12212	7.04012	5.15357
FBgn0035831	3.69288	4.1637	3.49148	3.19347	3.25105	3.50673	3.35468	3.77036	3.25168	2.80025	2.88616	2.65124	3.4771	3.38979	3.08537	3.06233	3.05197	2.97671	3.34431
FBgn0040524	0.710567	0.603579	0.840483	0	0	0	0	0	0.0319559	0.0892435	0	0	1.98503	1.01412	1.5948	0	0	0	0.18236
FBgn0015721	0.870931	1.15128	1.11449	0	0	0	1.96567	1.82829	2.0603	0.0702914	0.200735	0.0892881	0.809324	0.768067	0.697869	0.313814	0.23607	0.201098	0.247573
FBgn0001078	2.69326	2.32431	2.57299	1.72358	1.25385	1.01216	3.79387	1.80218	2.35252	2.68774	2.18122	2.69294	2.50604	2.27592	2.0374	2.43985	2.08527	1.64127	3.35806
FBgn0001079	2.09079	1.93208	2.30821	1.63181	2.12141	1.4729	2.07568	1.77398	2.24502	2.09203	2.15839	2.06216	1.92139	2.06605	2.00967	2.51089	2.39993	2.51697	3.69774
FBgn0004554	0.388957	2.16897	0.353445	0	0.0462448	0	0.0527717	0.521001	0.0662842	0.145274	0.432375	0.0335264	0.0339358	0.492393	0.0674679	0.0724743	0.259562	0.0442153	0.125347
FBgn0004556	1.72537	2.8328	1.63184	3.12392	3.49505	2.87998	1.92104	3.04947	2.17369	2.12727	2.07596	2.17824	2.25444	2.55702	2.07162	2.05507	1.97917	1.94042	3.40924
FBgn0004003	7.64067	7.18221	7.8358	1.9004	1.28684	1.75774	3.55433	3.56984	4.5551	7.43866	7.20965	6.65425	4.92577	4.71777	4.95082	6.11507	6.56181	6.29251	2.04084
FBgn0030964	3.84846	4.51223	3.64435	0.93316	1.3712	1.42644	4.72503	5.92187	4.7811	5.77678	5.87286	6.30327	4.43431	4.54112	4.63236	6.08676	6.14017	6.30841	4.3322
FBgn0002521	5.67227	5.24732	5.37656	4.89103	3.94012	3.68981	5.87361	5.45352	5.35207	4.95826	4.46032	4.72236	5.47762	4.97135	4.99627	5.21738	4.64991	4.37726	3.02643
FBgn0002526	4.79263	4.34934	4.80209	1.72965	2.38278	1.22109	6.02066	4.92115	5.53367	3.55559	3.1707	2.85527	7.09266	7.43833	7.2217	2.95528	1.94837	1.57319	2.5807
FBgn0002525	4.17667	4.44531	4.13256	2.87503	3.68509	3.43866	3.54692	4.08244	4.00585	4.07029	3.82952	4.10641	4.23091	4.39076	3.97976	4.16022	4.52533	4.37149	7.14222
FBgn0002524	4.33349	4.57283	4.49958	1.89854	3.04963	2.93237	4.00221	4.15819	4.29658	3.9275	3.97551	4.23451	5.15044	5.56594	5.42891	5.40772	5.80829	6.07764	5.5938
FBgn0013765	3.39521	2.98772	3.63032	1.8147	2.49864	1.42077	3.65849	2.87965	3.6477	2.3865	1.89151	2.09656	4.05143	3.8969	4.06194	2.28903	1.99831	1.67683	4.44866
FBgn0013764	4.69795	4.78329	4.72943	5.61992	5.50762	5.585	4.31797	4.40619	4.54239	4.86116	5.04769	4.74028	4.55324	4.6701	4.51544	5.206	5.37372	5.25215	6.65525
FBgn0013763	7.76694	7.19126	8.00023	9.80478	9.85262	9.71727	8.49377	7.80023	8.14737	10.2051	10.1755	9.9387	9.06634	8.81929	9.5546	8.24691	7.45291	8.26132	6.63676
FBgn0004066	6.98282	7.08569	6.26211	8.37606	7.36194	7.68363	5.95311	5.99368	5.48989	6.22811	6.4331	6.1725	6.0543	6.06245	5.61261	6.18454	6.3569	6.04206	8.14288
FBgn0011566	2.56106	2.69195	2.92553	3.02818	2.91244	2.99695	2.17663	2.22898	2.49772	2.86034	3.1002	2.89625	2.82479	2.61163	2.77497	2.36277	2.26531	2.32606	5.02547
FBgn0264605	4.13356	3.95807	3.78904	1.58802	2.08954	1.39335	3.99656	3.20785	3.28984	5.01231	3.61144	4.21403	3.38235	3.99455	2.28575	3.25566	2.95693	2.44655	3.15258
FBgn0264607	6.86774	5.9259	6.88423	3.1655	3.66648	3.24377	7.02659	6.18383	6.37891	5.50212	4.91412	5.30882	6.39614	5.59961	6.33562	5.36891	4.71301	4.69357	2.92219
FBgn0264602	0.469715	1.26247	0.686243	0.650155	0.387864	0.499802	1.36893	1.33805	1.04464	0.777968	0.711707	0.841795	0.525094	0.808808	0.387966	2.11957	1.98949	1.5419	0.0327785
FBgn0265959	2.75202	2.02095	2.94998	0	0	0	2.4294	1.08705	1.78153	0.361867	0.398811	0.298032	1.751	1.12259	1.91291	0.549054	0.105208	0.310136	0.254819
FBgn0052163	4.49713	4.11805	4.3484	5.06024	4.51653	4.95701	4.31087	4.54611	3.7497	4.41912	3.93395	4.1422	4.68554	4.53437	4.13784	3.81579	4.3786	4.05367	1.19989
FBgn0025629	3.26706	4.21559	3.24968	4.401	4.57142	4.30684	3.16241	3.94544	3.20598	3.43785	3.83727	3.42328	3.32211	3.57602	3.172	3.93407	3.75769	3.85529	4.37578
FBgn0025628	6.52216	7.88719	6.55675	8.01471	8.24855	7.30544	6.04111	6.93846	5.95303	5.40254	5.91803	5.69811	5.45226	6.00814	5.44733	5.84075	6.24807	5.68247	5.90606
FBgn0025626	3.3699	3.68777	3.64949	2.90298	3.52509	3.12782	3.61365	3.60123	3.78637	4.29682	4.36004	4.19328	3.76408	3.85227	3.74836	4.44742	4.30117	4.34099	4.85192
FBgn0025625	1.78179	1.76642	1.77934	2.73313	3.97058	3.86358	2.60484	2.28218	2.79132	2.15125	2.3974	2.52337	3.22266	3.44509	3.56098	1.92351	1.97745	2.24368	1.77671
FBgn0025624	3.68934	4.12607	3.76236	4.55054	4.72498	4.53792	3.73107	3.93285	3.81599	4.26536	4.38907	4.36685	4.29706	4.34147	4.3275	4.74367	4.65043	4.63473	2.96161
FBgn0025621	5.29373	5.06193	5.35966	6.88855	6.91762	6.43226	4.96119	4.74813	5.12521	4.98159	4.99601	4.85786	4.63289	4.70338	4.7936	5.26638	5.17261	5.19464	5.35024
FBgn0266977	2.68898	2.2238	2.421	0.740806	0.553214	0.873695	2.42845	1.91518	2.13264	0.402987	0.363925	0.342224	3.6754	3.37158	3.45491	0.441804	0.190695	0.295209	0
FBgn0030963	1.61861	1.84404	1.52341	1.13207	1.15781	1.4448	1.35471	1.57247	1.67345	1.48796	1.91818	1.54401	1.55256	1.32391	1.4157	1.78846	1.81328	1.72037	4.16401
FBgn0030611	3.98963	5.3047	3.51715	6.13294	5.93384	5.63929	3.88611	4.67365	3.47038	3.76708	3.87319	3.34217	3.7545	4.18156	3.40097	3.82151	3.96309	3.60678	3.6902
FBgn0267002	2.80799	2.41458	3.08175	1.47248	1.62486	0.829022	3.62084	2.63132	3.44435	4.91236	4.38817	4.74948	2.77788	2.97555	3.24888	3.2064	2.50609	2.55436	2.16854
FBgn0039215	3.4447	3.56102	3.73383	3.29867	3.66254	3.49388	3.71885	3.37207	3.8768	4.46231	4.52905	4.55921	3.57379	3.77286	3.84171	4.54539	4.36803	4.53979	5.67532
FBgn0039214	3.78621	3.37061	4.0031	2.90742	2.84476	1.63168	4.70109	3.64101	4.5603	4.92657	4.2441	4.62495	4.112	4.09691	4.21636	4.51258	3.92245	3.64611	3.93482
FBgn0039213	6.30668	6.16491	6.38627	5.81246	6.21655	6.15577	6.12882	5.72345	5.97707	6.59285	6.39388	6.50704	6.01752	6.10917	6.08605	6.58032	6.6732	6.81902	6.45565
FBgn0029706	4.54804	4.07066	4.608	3.9103	4.25506	4.47929	4.48376	4.00657	4.43781	4.51868	4.46465	4.68052	3.96079	4.08198	4.2016	4.46817	4.51782	4.76027	5.05811
FBgn0039219	5.11488	5.40414	4.94181	6.18318	6.03111	5.86218	4.48215	4.75377	4.51001	3.70503	4.24308	3.83459	4.62553	4.60194	4.47409	4.24962	4.28288	4.32078	5.24273
FBgn0086710	10.1994	10.3339	9.59223	12.5893	12.2067	12.2983	9.49696	9.52902	8.85535	10.1236	10.4329	10.0091	9.35605	9.19507	9.06188	10.1319	9.99029	10.1633	9.25388
FBgn0086711	3.81312	4.42261	4.06199	0.801469	0.412586	0.994842	2.11109	3.01684	2.85769	1.15194	1.35384	0.697325	4.0036	3.90272	3.96536	1.12667	1.79141	1.01002	6.64781
FBgn0086712	4.61809	4.98207	4.53139	5.88262	5.74196	5.80787	3.69028	3.96074	3.9501	3.64391	4.0171	3.65431	3.84679	4.08423	3.85722	3.9073	3.98244	3.91801	4.679
FBgn0030960	2.66814	2.36765	2.85018	2.834	3.66762	2.76823	4.62665	4.36508	4.20776	3.59439	3.08725	3.45471	3.04322	2.73943	2.96454	3.32156	2.83777	2.79574	1.32594
FBgn0021814	5.45907	5.96419	5.29219	5.8237	5.10878	5.35943	5.07562	5.24041	4.68892	4.6152	4.93714	4.58347	5.15565	5.40089	5.14029	4.939	5.30435	5.00866	4.34031
FBgn0027872	1.71732	1.67975	1.77605	1.12605	2.36707	1.60934	1.99628	2.32583	2.24611	1.90554	2.07803	1.9632	1.9089	1.85622	1.71878	2.37072	2.28646	2.25529	2.79147
FBgn0000212	3.64359	3.37344	4.10288	1.66167	2.77557	1.57882	4.50483	3.8394	4.62808	4.5981	4.2683	4.48484	4.24404	4.3035	4.48213	4.62448	4.47731	4.19186	4.24365
FBgn0008646	5.44376	5.64569	5.53836	0.256309	0.354499	0.173793	0.981429	1.12197	1.82778	1.05396	1.51209	1.06355	1.26873	1.44078	1.7828	0.471131	0.671042	0.637974	0.336464
FBgn0262481	1.35988	1.47874	0.996296	7.59648	6.61659	6.69303	1.22147	1.82377	1.09706	2.11098	2.14768	1.92783	2.15335	2.00249	1.85058	1.63763	1.45241	1.7112	0.997459
FBgn0003129	1.08958	0.778217	0.84096	0	0.190215	0.0874007	3.789	3.78173	3.2474	0.765766	0.744414	0.678655	0.748015	0.631031	0.518062	1.27764	1.00281	1.18206	0.442083
FBgn0037918	3.29504	2.88581	3.68389	1.53141	2.23292	2.02745	3.42677	2.91243	3.55649	3.87047	3.77999	3.7789	3.4811	3.42559	3.49812	3.93747	3.81098	3.85522	5.2658
FBgn0027654	3.83816	4.00674	3.96349	3.19567	3.14695	3.40754	2.8579	2.92003	2.81048	2.56837	2.53944	2.51127	2.20736	2.35449	2.58523	2.4461	2.58662	2.4809	1.34503
FBgn0267519	4.57052	4.3016	4.77763	6.90341	6.19971	5.83164	5.28897	4.91796	4.26569	5.06085	4.90037	4.50907	4.92555	4.41166	3.94488	4.57937	4.11072	3.94931	2.6093
FBgn0036509	4.74756	4.69689	5.03835	3.51011	3.61918	3.55183	5.08657	4.69725	5.02086	5.20056	5.0495	5.31345	5.23861	5.20483	5.38359	4.93718	4.91235	5.09317	3.77222
FBgn0016061	3.11875	1.60333	2.94635	0	0	0	3.6118	2.60096	3.08256	0.614809	0.464913	0.291047	3.58497	3.10992	3.54159	0.643543	0.489138	0.195384	0.117832
FBgn0039666	1.17984	1.23078	0.544831	6.84121	4.91323	4.24925	1.49401	1.53775	0.440496	1.15802	1.80446	1.1466	1.99079	1.68894	0.999605	2.15362	1.0934	0.863793	0.0581564
FBgn0003345	3.87763	3.43966	3.99292	1.10753	1.04939	0.681376	5.8908	3.8682	4.97691	4.82958	3.77333	4.08643	3.9303	3.94975	4.22893	4.02681	3.56334	3.243	1.31905
FBgn0039664	2.10621	2.78012	2.32282	3.4103	2.94457	3.39018	2.20833	2.22612	2.31288	3.18421	3.45335	3.15521	2.21691	2.23076	2.14777	2.81283	3.14997	3.14743	3.6316
FBgn0039665	2.49482	3.2398	2.2986	1.39467	1.55509	1.29596	1.82538	2.05845	1.96609	2.36129	2.76168	2.42214	2.30232	2.71366	2.23778	2.36448	2.91685	2.48446	3.56357
FBgn0039668	4.20765	3.9925	4.51064	3.46275	4.0215	4.42552	4.55673	3.89554	4.6243	4.66436	4.49945	4.79491	4.01627	4.15206	4.38214	4.69655	4.95011	5.15825	5.46898
FBgn0033079	5.89591	5.9559	5.7179	4.68485	5.68015	5.89521	4.95958	4.77761	4.7557	4.39248	4.9782	4.61114	4.44908	5.19241	4.71874	3.92479	4.622	3.89285	2.5386
FBgn0026257	1.71863	0.543107	1.8073	0.157939	0.290855	0.368333	4.28395	3.10939	3.9645	1.32928	0.6124	0.67966	2.07253	1.05948	1.87392	1.26367	1.08727	0.835545	2.48378
FBgn0284252	6.43133	5.71795	6.85675	3.72251	4.47677	3.06381	6.85063	5.46193	6.80512	6.38514	5.83899	6.42634	5.76151	5.52814	5.99608	6.04913	5.66514	5.59077	3.8223
FBgn0263650	3.22342	2.71959	2.79623	0.175828	0.271925	0.314462	1.1855	1.09269	0.996472	0.954535	0.698925	0.400992	2.45269	2.23141	2.02903	0.285046	0.211207	0.271712	0.0659886
FBgn0026255	3.05359	2.35301	3.03019	0	0	0	2.90534	2.03029	2.51351	0.769345	0.538478	0.398292	3.46158	2.95986	3.16107	0.642298	0.219981	0.201163	0.103812
FBgn0020224	3.84819	3.52651	4.16613	2.23494	3.10798	2.26112	4.26473	3.86608	4.51257	3.96882	3.55186	4.02082	3.85103	3.77806	4.13603	3.79707	4.00481	4.15459	5.82971
FBgn0261238	3.11436	3.01389	3.14621	0.166911	1.65104	0.906939	3.651	2.75286	3.43984	4.09936	3.90206	4.05255	3.89704	3.95569	4.1046	3.54213	3.61438	3.21447	5.49712
FBgn0261239	2.74438	2.08012	2.81601	1.66898	1.38999	1.46578	3.05337	2.14181	2.65038	4.05599	3.79016	4.00048	2.95276	2.57365	3.23214	5.23358	4.59052	4.80245	4.04308
FBgn0029833	5.03948	5.44685	4.68139	6.46023	6.01196	6.14887	4.25739	4.71622	4.07943	4.70493	4.99506	4.61642	4.67504	4.72581	4.40343	4.7025	5.00784	4.82069	5.4931
FBgn0029830	3.30903	3.16781	3.64933	0.230865	0.387141	0.204987	3.06331	2.93266	3.1856	1.52225	1.8238	1.28279	3.74103	3.4898	3.6868	1.04338	1.64951	0.979843	2.40482
FBgn0031873	3.45497	3.63203	3.20417	3.42772	3.22739	3.30643	3.17912	3.46844	2.88169	3.02331	3.16032	2.86202	3.18641	3.03163	2.80696	3.23265	3.45799	3.07724	2.99041
FBgn0031871	3.87203	3.66664	3.88493	2.55315	3.04546	3.18643	3.91719	4.00664	3.97235	3.63362	3.78084	3.55205	3.8321	3.92051	3.84232	3.77568	3.78801	3.72504	4.83894
FBgn0029831	0.905513	1.75484	1.00061	4.30106	4.68638	5.48096	1.01864	1.46971	1.50259	1.96204	2.29912	2.51459	1.86804	1.78175	2.07427	1.53533	1.43665	2.19129	3.33048
FBgn0031877	2.189	2.07572	2.1219	4.29781	4.04674	4.17779	2.04808	2.19658	2.25341	1.97146	2.38077	2.02344	2.26987	2.2369	2.19854	2.26094	2.05772	2.30026	2.57265
FBgn0031876	2.12658	2.50566	2.09854	1.01803	1.6326	1.7302	1.98036	2.34815	2.02014	2.29571	2.34721	2.14707	2.27576	2.27183	2.08441	2.36536	2.45749	2.23047	2.23054
FBgn0031875	1.04845	1.13675	1.02308	0.722666	1.35328	1.46098	0.911169	1.28245	1.97794	1.57994	1.65856	1.37467	2.2061	1.50703	1.21941	1.48131	1.68394	1.62995	5.58102
FBgn0031879	3.5693	3.57731	4.0286	0	0.211907	0	1.5929	0.646132	1.58729	3.32693	2.81868	3.04774	5.18021	5.08075	5.68868	4.20359	3.72466	4.05544	1.20666
FBgn0265140	2.66032	2.67922	2.82788	1.37931	2.21527	1.63602	5.00279	3.72457	4.93713	3.52873	3.06596	3.36748	3.05044	3.1865	3.2973	3.43812	3.31482	3.14308	3.36568
FBgn0265988	3.89552	2.8689	4.19832	2.97098	3.97505	2.81661	4.75168	3.10391	4.46891	4.71543	4.17175	4.4797	4.30281	3.86429	4.51397	4.83019	4.51348	4.4197	4.19966
FBgn0034750	3.61984	3.68853	3.50515	2.75458	3.12985	3.19073	3.37115	3.4954	3.39324	3.88986	3.92621	3.68554	3.4865	3.5007	3.58216	3.73153	3.96146	3.78042	4.44937
FBgn0024558	3.95705	5.35168	3.61657	6.63143	7.0185	6.45804	3.49281	4.55099	3.73259	3.6329	4.2049	3.65371	3.97729	4.26756	3.61206	4.41077	4.21203	4.19674	7.33491
FBgn0028916	2.08682	2.0401	2.19549	1.1412	1.56484	1.45565	1.81478	1.76409	2.24948	2.42459	2.23499	2.2592	2.61751	2.127	2.31881	4.37372	3.75811	4.32536	5.62233
FBgn0034335	6.12402	6.50692	6.21695	5.87333	5.63407	6.22066	5.39322	5.89342	5.40825	5.56131	5.72515	5.66985	5.57482	5.76722	5.71985	5.77293	5.89039	5.8577	4.9703
FBgn0040064	6.38304	6.46703	6.12395	10.2638	9.74657	10.0541	6.29763	6.36866	6.38116	6.17784	6.54736	6.37492	6.57096	6.38864	6.45995	6.08104	6.44873	6.3652	7.51926
FBgn0040066	3.14906	3.82361	3.30325	2.22208	3.42266	2.98469	3.74072	4.13651	3.92842	4.22793	3.98812	4.32805	3.68792	3.89506	3.68916	4.3741	4.22881	4.61481	5.34744
FBgn0034330	3.9646	4.35618	3.44748	10.8821	9.92492	9.88948	3.881	4.25769	3.58421	4.50658	4.73153	4.54894	4.89174	4.57255	4.4884	4.32824	3.87611	4.10929	3.58234
FBgn0015268	7.45504	7.99508	7.46754	9.29989	9.34414	9.39998	7.60115	8.11961	7.74833	7.6573	7.89577	7.8033	7.37691	7.44893	7.33571	8.14943	7.40747	7.97458	8.95327
FBgn0015269	3.12542	2.09245	3.70965	0.894191	0.823612	0.414957	4.71657	2.64411	4.19499	3.81071	2.83731	3.37681	3.70522	3.4462	4.005	3.19059	2.26201	2.17534	1.23426
FBgn0034628	2.18688	2.46842	2.16084	5.05289	4.97927	5.38978	2.06819	2.10398	2.29283	2.25246	2.62577	2.71642	2.56098	2.50892	2.56724	2.17578	2.01055	2.4438	4.45263
FBgn0038130	7.58414	7.7958	7.81454	0	0.311107	0.639479	4.51361	4.03102	4.6445	2.064	2.55824	1.98489	6.60021	7.14124	6.86352	5.51291	5.58454	5.26149	0.75618
FBgn0010038	1.59472	3.12791	0.515349	1.78787	1.81049	1.11743	1.45127	0.828406	0.18373	2.01924	2.15674	0.834408	0.962468	0.974844	0.363358	1.49728	2.68517	0.413941	0.843568
FBgn0010039	3.19472	3.68464	2.59826	2.12357	1.12433	1.45216	2.45917	2.61404	1.93968	1.59999	1.55456	1.25952	3.20448	3.10322	2.94172	1.16902	0.981839	0.791647	1.48661
FBgn0030969	2.28709	2.5068	2.46661	2.09888	2.79629	2.75494	2.40125	2.59185	2.40614	2.76645	2.94728	2.78318	2.68933	2.74535	2.51165	2.9453	3.14388	2.87464	4.50814
FBgn0024556	6.56438	6.80569	6.57953	7.48199	7.3343	7.71478	5.9542	6.22883	6.20602	5.01746	5.50025	5.2524	5.62827	5.71764	5.74074	5.69135	5.50373	5.84186	7.35605
FBgn0035953	3.27426	2.9541	3.52587	1.77619	2.3903	1.81588	3.53201	2.94178	3.68436	3.45746	3.23894	3.54208	3.3173	3.22535	3.41181	3.39017	3.36511	3.46649	3.80093
FBgn0051633	3.20924	3.48273	3.35188	1.99047	2.28226	2.17681	3.59725	3.44538	3.36444	2.72094	2.78436	2.71093	3.22897	3.06096	3.02295	2.45215	2.83522	2.33675	1.52023
FBgn0040206	4.75887	5.15821	4.72248	4.54566	4.59268	4.41723	5.39477	5.14095	5.03831	4.25987	4.14776	4.25631	4.14532	4.33884	4.06479	4.23878	4.08186	3.88111	4.29665
FBgn0040207	3.80197	3.77952	3.97396	1.8289	2.43212	2.6898	3.71098	3.55401	3.84895	3.92348	3.64901	3.86059	3.78388	3.85513	3.72502	4.02483	4.11662	3.99609	5.57829
FBgn0051637	4.56862	3.8479	4.52759	3.23945	3.20749	3.44616	4.76152	4.39843	4.56904	3.65435	3.6745	3.88201	5.76494	5.54671	5.81877	4.25335	4.2441	4.42452	4.031
FBgn0051635	3.90616	3.61567	4.36978	3.35164	2.84796	2.82752	5.07142	3.52355	4.52022	4.69112	3.63288	4.37689	4.27344	4.033	4.37117	3.91359	2.84871	3.13695	3.84098
FBgn0051184	4.44162	4.81237	3.83504	6.19895	5.62893	5.69929	4.02487	4.28851	3.64829	3.5883	3.86036	3.69375	4.19499	4.12794	3.56917	3.89536	3.9406	3.51058	4.50894
FBgn0051638	3.06144	2.82476	3.11793	0.617802	1.14962	1.4981	3.01531	2.71596	2.95788	1.98919	2.11347	2.2007	2.50396	2.3647	2.63245	2.26996	2.32935	2.43033	3.51995
FBgn0040208	4.17784	3.74268	4.22124	2.95383	2.74556	2.92093	4.37801	3.75185	4.28224	4.53044	3.96992	4.27704	4.29829	4.03686	4.12779	4.32356	4.25653	4.34947	5.16424
FBgn0051183	2.24038	2.2841	2.66108	3.44413	4.60565	4.64375	1.96082	2.46563	2.06251	1.89667	2.09675	2.34441	2.96747	3.30768	3.22394	1.99682	1.96554	2.12733	1.32032
FBgn0038578	2.56662	2.55012	2.74839	3.30377	3.04001	3.07731	2.72629	2.61486	2.90989	3.09101	3.05905	3.07611	2.99753	2.80652	2.74862	3.26437	3.28844	3.3171	4.14328
FBgn0026479	4.89622	4.978	5.22285	4.60048	5.32105	5.25627	4.67608	4.55029	4.95083	4.76541	4.77315	4.75858	4.89149	5.04455	5.13341	4.73905	4.82677	5.06556	6.22581
FBgn0263600	1.42717	1.73418	1.83094	0.981312	1.70822	1.18431	1.72996	1.63484	2.39488	1.87629	1.82422	1.72641	2.55283	1.99482	2.00587	1.77489	2.06952	1.86544	5.38456
FBgn0038577	4.23564	4.0591	3.95207	4.05231	3.58587	3.73284	3.9291	3.69492	3.67975	3.97124	4.14556	3.89313	4.11789	3.86337	3.92645	3.81237	4.11918	3.91072	4.37512
FBgn0263602	3.73874	4.03837	4.26341	2.39643	2.5177	2.51973	4.02218	3.98705	3.86327	3.12452	3.20204	3.18253	4.25681	4.25534	3.93818	3.40414	3.59102	3.44657	5.71711
FBgn0264855	4.31368	4.11053	4.38486	3.2224	3.92838	2.89487	4.99786	4.54872	4.97174	4.78469	4.46568	4.83121	5.39808	5.33039	5.58828	4.77512	4.75854	4.64132	5.29732
FBgn0264857	2.22368	1.47865	2.70819	0	0.163916	0	3.1263	2.7222	3.16561	0.943227	0.70946	0.778129	2.79039	1.75224	2.90804	1.52937	1.53392	1.55216	0
FBgn0021847	4.34716	4.46596	4.44566	3.43552	3.25295	3.42007	3.96558	4.12938	4.2455	4.2311	4.42725	4.10181	3.97478	4.16073	4.09399	4.33911	4.48373	4.46219	5.51438
FBgn0263605	1.84813	3.15604	2.09621	1.1412	2.75497	2.32296	2.00516	3.14648	2.61182	2.3385	2.61641	2.44101	2.47697	2.88604	2.22607	2.67023	2.72038	2.70235	5.0486
FBgn0083990	2.69154	2.7006	2.0689	4.41092	3.99679	3.89109	1.79908	1.85907	1.48012	1.00163	1.24881	0.863422	1.432	1.44182	1.34092	1.11027	1.26034	1.01288	1.65042
FBgn0083992	4.47663	4.45346	4.63246	3.61759	3.88704	3.84411	4.4249	4.25933	4.66308	4.49945	4.57162	4.49165	4.09714	4.13975	4.33155	4.49527	4.26883	4.49867	4.42618
FBgn0051457	2.31715	2.41042	2.29995	1.84942	2.01035	2.30894	2.01231	2.18187	2.12081	2.59757	2.70989	2.31011	2.48142	2.3379	2.30984	2.55617	2.88904	2.64617	4.56829
FBgn0051453	1.95791	1.86113	1.6608	4.29036	3.37493	3.93271	1.60833	2.03052	2.02202	1.62453	1.68173	1.36698	2.77313	2.09026	1.8905	1.10149	1.10488	0.868225	6.49888
FBgn0051451	2.71315	2.42013	3.08082	1.06827	0.561681	1.2414	3.32389	2.91453	2.85925	1.12012	1.10794	1.15875	1.99573	1.96564	1.68877	0.762258	0.661503	0.674576	0.386775
FBgn0035469	4.75592	4.77636	4.61926	5.80257	5.33024	6.04986	4.90518	4.95173	4.36373	4.31738	4.63872	4.21413	5.09252	5.02473	5.00809	4.53988	4.67979	4.42853	3.15469
FBgn0267398	7.20143	6.99307	6.83189	7.93343	6.6367	6.47214	7.2413	7.21148	6.58819	6.92838	6.35506	6.403	7.25368	6.84697	6.66904	6.64668	6.27047	5.86492	3.51135
FBgn0051989	2.08779	1.81449	2.34635	0.175828	0.775106	0.758649	2.38077	1.74122	2.66799	2.5136	2.30977	2.49468	2.3512	2.31264	2.41215	2.78854	3.01935	2.89159	2.6707
FBgn0000119	3.2954	2.59879	3.84512	2.21494	2.41802	2.14625	3.71367	2.58486	3.83385	3.70295	3.28567	3.79215	3.91548	3.8613	4.31485	4.67036	4.66417	4.69468	2.39108
FBgn0265726	4.44005	2.94949	4.44184	0.230865	0.392264	0.364167	5.83387	5.60515	5.87637	1.42511	0.76141	1.33484	3.14293	2.31187	3.35387	1.06934	0.749083	0.708925	1.25459
FBgn0030833	2.10129	1.90817	2.28453	1.51744	2.2552	1.84449	2.37134	2.12973	2.67958	2.56043	2.63282	2.60407	2.36025	2.26471	2.21494	2.67066	2.82058	2.80976	5.14939
FBgn0030838	4.41148	3.70366	4.62915	3.59653	4.62785	4.56347	4.82918	4.14518	4.72254	4.54286	4.27118	4.65542	4.47415	4.04339	4.51901	4.51592	4.38099	4.64835	4.94646
FBgn0030839	2.10131	1.84224	2.13053	3.70212	3.0324	3.82831	2.66234	2.33174	2.45766	2.08026	2.13304	2.44875	4.0205	3.76918	3.97243	2.04769	1.80397	2.43549	3.29368
FBgn0000116	7.73323	9.2956	7.71796	5.68687	5.31859	5.99146	8.92631	6.82965	6.87535	7.84678	8.45973	7.54576	8.47653	8.06278	6.40362	9.11827	8.50388	9.35397	7.6064
FBgn0000117	7.21576	6.92373	7.2617	6.59823	6.60152	7.01927	7.11503	6.87046	7.23096	7.42234	7.40858	7.3714	7.32934	7.2003	7.37011	7.67013	7.94015	8.01168	8.92328
FBgn0037898	3.33335	3.42098	2.69899	3.7351	3.49242	3.21301	3.37912	3.51076	2.96994	2.13365	2.18024	1.84176	2.23585	2.24735	1.74312	2.32808	2.57736	1.92597	2.75423
FBgn0085294	7.14822	10.8611	7.40291	1.25468	3.28304	1.36485	3.72692	5.95328	2.5178	2.42408	5.78266	2.16933	3.04284	6.04314	3.16108	3.27615	4.84644	2.74005	0.0880921
FBgn0036668	2.91982	2.46779	3.08116	1.98968	2.13217	1.44104	4.56101	3.19543	3.91268	4.34887	3.41523	3.99628	3.50406	3.1805	3.52181	3.88294	3.06672	2.83622	3.02295
FBgn0036666	5.47583	5.22847	5.55744	3.66446	5.1757	4.63046	5.72248	5.4372	5.53778	5.14421	5.03082	5.13451	5.2895	5.29949	5.42522	5.06099	5.19429	5.10295	3.94823
FBgn0036665	1.32703	0.691588	1.73552	0	0	0.0749816	3.83913	1.97151	4.18032	0.619824	0.573952	0.741802	3.52767	3.47738	3.82672	0.39569	0.401128	0.586154	0.327074
FBgn0036663	5.95143	5.24472	6.46013	5.62127	5.29986	4.62317	7.33013	6.08174	7.35541	5.85382	5.36431	5.74028	6.19963	5.87332	6.52473	7.3269	6.87639	7.15428	5.17128
FBgn0036662	3.81086	4.30802	3.64545	5.51553	5.94635	4.97964	4.02835	4.29653	3.79347	6.82129	6.82987	6.27446	4.34601	4.94566	4.48655	5.75241	6.29493	5.91208	4.6764
FBgn0036661	4.68443	3.99228	4.39136	1.24915	2.07595	1.4228	4.85035	4.52082	4.70767	4.43091	4.02757	4.55149	4.61141	4.43423	4.49758	4.3077	4.00934	4.21029	5.25476
FBgn0036660	1.85683	2.03883	1.76897	1.56339	1.68277	1.92919	1.39424	1.62794	2.08368	1.50257	1.42647	1.24032	2.11802	1.51932	1.44319	1.98016	2.10654	1.85446	6.47949
FBgn0023513	1.45096	1.4636	1.57176	2.13733	2.37523	2.03391	1.55261	1.49133	2.00062	2.33831	2.73522	2.20004	2.16325	1.98864	1.97142	2.03905	2.99848	2.35479	4.98799
FBgn0032748	2.76695	2.5645	3.08419	1.46045	2.67463	1.46589	3.92955	2.87724	3.68215	3.956	3.29924	3.78668	3.29005	3.28484	3.33912	3.85015	3.55787	3.46036	4.75787
FBgn0262734	5.5345	5.74885	5.03603	5.17208	4.91253	4.3707	6.59511	5.56883	5.31625	5.20927	4.80588	4.9926	4.73953	4.99287	4.29091	5.103	4.59531	4.32533	5.08768
FBgn0032961	4.76016	5.47894	4.65143	4.17473	5.05917	4.57117	4.7961	5.28649	4.81009	4.75708	4.91537	4.72103	4.70959	4.97901	4.59647	4.9833	4.96078	4.94342	5.58419
FBgn0286034	1.02804	0.649503	1.16946	3.68041	3.17345	3.63845	0.925187	0.918758	0.64882	1.05647	1.21168	1.22894	1.09706	1.36615	1.21949	0.933252	0.7727	0.70981	1.14173
FBgn0086558	9.11946	9.05824	9.22	10.2212	9.54073	9.3633	9.26883	8.62934	9.23248	9.64201	9.50566	9.52266	9.44262	9.43758	9.68975	10.0712	10.3274	10.0323	9.50806
FBgn0286030	1.49538	1.31851	1.36537	0.374278	0.923059	1.32833	0.941365	1.24367	0.934203	1.40988	1.31547	1.24644	1.3122	1.50096	1.46547	0.853965	0.769798	0.774825	0.374558
FBgn0001197	4.81227	5.09438	4.74329	3.43581	4.18127	4.12558	5.39811	5.9393	5.71323	5.26779	5.09484	5.18558	5.56342	5.23924	5.09433	5.57219	5.4991	5.47826	6.56111
FBgn0023510	4.13834	3.78336	4.38054	1.71042	2.17102	1.73457	5.03964	3.96935	4.90918	4.41848	3.93302	4.23307	3.99523	4.21024	4.30921	3.92261	3.7589	3.69372	3.43701
FBgn0023517	4.30528	4.77783	3.8909	5.49498	5.41795	5.24723	3.68478	4.28997	3.68368	4.58014	4.76722	4.39502	4.23537	4.12906	3.67256	4.5182	4.74175	4.45089	6.6155
FBgn0041004	5.10297	4.95113	4.99226	3.27612	3.91668	4.41525	4.80597	4.91323	4.64873	3.73517	3.74545	3.54758	4.62945	4.36434	4.20527	4.04735	4.14936	3.87602	5.31314
FBgn0037890	5.56175	5.75619	5.45354	6.7899	7.07675	7.1021	5.77758	6.30586	5.46217	5.32964	5.54928	5.01613	5.51459	5.65771	5.37883	5.05586	5.29314	4.83196	4.024
FBgn0005564	5.39672	5.36895	5.20702	0.404938	0.15447	0.302316	3.71626	3.69612	3.45602	1.49318	1.62458	1.26509	4.70412	4.32095	4.73825	1.41557	1.3833	1.19298	1.81327
FBgn0003977	2.39172	2.26566	2.74076	2.18365	2.68467	2.54553	2.86419	2.36569	3.03	3.24029	3.22068	3.32747	2.546	2.9082	2.97003	3.71439	3.785	3.69669	3.6011
FBgn0003975	0.571172	0.411336	0.613578	0.490491	0	0.803447	1.25471	1.59143	1.56863	2.34687	2.1309	2.30054	1.58525	1.49349	1.83494	6.73771	6.12742	6.6653	0.29239
FBgn0013954	7.89686	8.42681	7.51753	10.7382	10.2019	10.4687	7.90957	8.08568	7.47114	7.54612	7.78957	7.51534	7.928	7.96442	7.77669	7.87924	7.79673	8.01068	9.17743
FBgn0013953	8.8506	8.22725	9.195	1.53032	1.50596	2.28986	9.07094	8.26353	9.4048	4.34104	4.46385	4.63096	7.77694	8.42143	8.1927	5.11196	5.28689	5.16742	3.37562
FBgn0053178	3.46692	2.43063	3.10823	0	0.691462	1.10341	0.363748	0.13013	0.883741	1.28325	0.740051	0.981781	0.21492	0.302665	0.744503	0.6656	0.290086	0.635048	1.96369
FBgn0266540	2.06069	2.1573	2.248	1.68781	1.95896	0.991946	2.66038	2.45489	2.74006	3.27436	2.74786	3.09896	2.51968	2.64501	2.65834	2.78419	2.71809	2.5093	2.8782
FBgn0014029	5.06202	5.50518	4.80308	4.81661	4.33408	4.27942	4.90281	5.18663	4.82169	5.10249	5.44507	5.12613	5.03758	5.39679	5.05742	5.33135	5.65102	5.34865	6.06991
FBgn0001220	6.37445	6.82904	6.64156	6.22775	7.06669	7.26144	6.26936	6.42644	6.56701	5.6302	5.69399	5.89753	5.77003	6.13967	6.04617	5.94936	5.93189	6.28656	6.87708
FBgn0053170	7.68971	7.77145	7.01717	7.81213	7.23527	7.25886	6.24526	6.27927	5.57034	4.51953	4.48326	3.99245	5.83093	5.91966	5.05214	4.66907	4.69134	4.15426	4.57926
FBgn0001994	3.05398	2.6757	3.30623	2.04166	2.44734	1.66029	4.98681	3.23198	4.10546	4.56242	3.21709	4.02557	3.67638	3.841	3.87882	3.92823	2.68845	3.02716	4.57168
FBgn0001225	4.21913	7.22462	4.68439	3.94403	3.40276	5.68066	3.35733	4.47721	5.99561	5.01671	4.95864	5.86698	6.72996	5.14393	5.79341	5.75034	6.22239	6.34143	10.3763
FBgn0001991	4.44772	3.68619	4.57772	0	0	0	5.63106	4.20336	4.73195	1.29816	0.70614	0.892761	5.36469	5.32713	5.97315	1.39055	0.614924	0.648365	0.285698
FBgn0001990	2.04838	1.71083	2.01794	2.27204	2.86411	2.36264	2.23336	2.22563	2.49794	2.72588	2.7705	2.74581	2.30576	2.37095	2.47271	2.52212	2.68887	2.42936	3.91016
FBgn0004598	5.15064	5.5367	5.64944	3.85695	4.74116	4.60377	7.20506	6.21601	7.17117	4.85413	4.55989	4.98297	5.80901	6.05922	6.00162	4.60353	4.22974	4.82683	7.15189
FBgn0030290	0.960766	1.04503	0.893749	0	0	0	1.79926	2.23196	2.15566	0.112873	0.0619296	0.119338	0.220256	0.371624	0.360245	0.103987	0.135215	0.177406	0.11895
FBgn0004908	4.07586	4.7338	3.52071	4.0069	3.65786	3.46375	3.40234	4.16425	3.14272	3.25566	3.4107	2.82181	3.65069	3.97035	3.12414	3.25651	3.67128	3.21178	4.27923
FBgn0030291	2.96482	4.00175	2.64158	3.70544	3.41873	3.39354	2.71833	3.57448	2.6174	2.45583	2.70983	2.38446	3.08625	3.11531	2.40413	2.59826	2.75031	2.37398	4.57359
FBgn0030292	5.18515	5.01888	5.05127	5.65287	5.31385	5.80543	4.75899	4.50633	4.60359	4.1623	4.45549	4.03346	4.31665	4.21132	4.4814	4.19038	4.20151	4.19606	3.79796
FBgn0011802	1.03986	0.7869	0.962408	0.382005	0.47256	0.390229	1.65742	0.978235	1.50795	1.51633	0.941025	1.1447	1.06562	0.767125	1.06783	1.03821	0.555036	0.545055	1.80799
FBgn0030293	4.04913	3.96587	4.24917	3.11091	3.59891	3.38831	4.17416	3.93537	4.31051	4.67483	4.39203	4.44839	4.02674	4.13839	4.18984	4.68834	4.91088	4.94182	6.61975
FBgn0005694	3.51136	3.69741	3.61784	2.86499	3.71001	2.25504	4.53087	4.14931	4.51496	5.06007	4.37838	4.70928	4.13621	4.13125	4.38129	4.6693	4.02799	4.05107	3.96735
FBgn0005695	3.44164	3.15704	3.65289	2.73313	3.20821	3.12793	3.61881	3.21576	3.85096	3.1371	2.89128	3.0992	3.57915	3.23417	3.18287	3.72092	3.37731	3.60338	5.89537
FBgn0033566	3.53331	3.90146	3.49478	3.48522	3.32364	3.6108	3.32202	3.52516	3.38218	3.1244	3.46052	3.04275	3.40212	3.45104	3.37484	3.10945	3.52919	3.2579	4.96553
FBgn0033564	3.36995	3.24663	3.45408	2.6872	2.51467	2.91765	2.86368	2.50232	3.00062	2.14295	2.39893	2.27798	2.76322	2.98493	2.88638	2.02772	2.10967	2.01112	2.02105
FBgn0266549	3.01872	2.92001	2.39989	2.42908	1.65106	1.3996	3.33235	2.22668	1.76467	2.07683	1.90453	1.92621	1.98821	1.99034	1.48342	2.43024	2.1149	1.94905	1.59527
FBgn0032154	1.39723	1.84739	1.7676	1.54867	2.5192	2.69046	2.00677	2.32742	2.3047	1.28591	1.63757	1.58082	1.68066	1.67256	1.56459	2.10137	1.86518	1.91052	4.48072
FBgn0035213	2.09089	2.60437	2.4365	1.93658	3.20145	1.96458	2.82105	3.18541	3.02211	3.29398	3.00827	3.24133	2.47561	2.69917	2.60026	3.37559	3.07031	2.89596	3.8134
FBgn0024236	3.93643	4.10209	4.12527	3.909	4.79398	4.45287	4.17473	4.10258	4.34717	4.6438	4.36117	4.60896	4.62329	4.72058	4.65662	4.80661	4.71405	4.91636	5.38585
FBgn0035211	2.15818	2.15709	2.06202	4.4343	3.70848	4.07472	2.2716	2.12737	2.00585	2.87472	3.1317	3.00377	2.39255	2.36529	2.31709	3.12706	3.02311	3.14345	3.65378
FBgn0035210	1.03447	1.05048	0.836878	3.25004	2.79644	2.85464	1.41077	1.52048	1.3985	0.633515	1.16151	0.668038	1.67588	1.30898	1.06054	0.72341	0.978374	0.732115	4.99318
FBgn0024230	4.008	3.86578	3.94128	2.96714	4.14612	3.80166	3.53596	3.74716	3.70437	3.36926	3.57506	3.48723	3.20644	3.37749	3.2792	3.74134	3.97112	3.80552	3.01645
FBgn0263006	9.99676	9.21025	9.96809	5.37039	6.93172	5.60349	9.23907	8.35357	9.06971	8.36832	7.99676	8.17106	9.05966	9.06046	9.19926	7.89481	8.10327	7.60963	6.54599
FBgn0263005	1.48117	1.14021	1.32662	0.883345	1.50596	0.63733	1.37364	0.909367	1.55191	0.652843	0.724526	0.445313	1.34422	0.924217	1.32976	1.34529	1.26762	1.27176	4.12568
FBgn0024728	3.5688	2.97398	3.5294	2.10356	1.71963	1.30841	4.51461	3.30936	4.06365	4.16776	3.28475	3.6942	3.94131	3.49464	3.91978	3.76237	2.91487	2.81454	1.5639
FBgn0024238	4.76207	4.82326	4.71942	4.21498	4.6166	4.01029	5.51884	5.38265	5.07293	5.59393	5.75632	5.88474	4.88265	5.00411	5.00828	7.01646	7.18057	7.51704	5.76158
FBgn0036993	2.60667	2.11919	2.72044	5.10281	5.63597	6.22457	3.1884	3.36571	3.19384	3.12508	3.36416	3.62258	4.60175	4.00082	5.09119	2.55111	2.27215	2.85504	2.05434
FBgn0015229	3.04517	2.41493	3.20895	0.429832	1.14095	0.300313	4.81257	2.9553	4.1229	4.39492	3.34908	3.99563	4.20522	4.02999	4.51885	3.66006	2.59355	2.53488	2.95921
FBgn0000008	1.32338	1.27717	1.68477	0.848575	1.41285	1.37545	2.16663	2.36581	2.49398	2.32164	2.63195	2.81489	2.26335	1.97628	2.60166	5.90569	5.69573	5.75547	2.24868
FBgn0038530	0.25471	0.944934	0.164883	1.84557	0.722034	2.12847	0.699399	1.23192	0.151589	0.210625	0.286059	0	1.10614	2.25769	0.829515	0.149776	0.226377	0	0.355762
FBgn0033467	4.07594	4.40438	3.36184	5.01588	4.20197	4.00763	3.37213	3.72655	2.80825	2.9135	2.7969	2.50065	3.36954	3.26815	2.79772	2.44233	2.96231	2.29091	2.85226
FBgn0028983	4.88766	6.10763	4.54332	3.32227	3.82065	2.95609	4.32201	5.30605	3.92603	4.85603	5.39759	5.19127	4.18134	5.43849	4.25864	4.68677	5.00557	5.14467	3.05171
FBgn0040467	1.60738	2.08807	1.2784	1.87598	2.27118	1.88781	1.62274	1.83438	1.57066	1.64672	2.02564	1.42416	1.46894	1.66364	1.24519	1.71285	1.98845	1.79539	3.24154
FBgn0086909	4.32397	3.30989	4.44895	2.90968	3.03696	3.35377	5.24242	4.34378	5.11752	5.22004	5.01937	5.26336	4.22967	4.34772	4.43802	5.51775	5.39515	5.27642	1.76084
FBgn0086908	2.79943	2.71544	3.06204	2.48619	2.83242	2.90485	2.82367	2.78461	3.19088	3.00693	2.91827	2.98332	2.68327	2.83122	2.80881	2.98155	3.15123	3.03533	5.2961
FBgn0086904	9.60513	10.0635	9.17995	12.0225	11.839	11.8438	9.05073	9.41283	8.71843	9.09547	9.46718	9.33442	8.86487	8.73572	8.53737	9.385	8.87303	9.33899	10.1827
FBgn0086906	8.86882	8.67699	8.80097	1.12144	1.17534	1.41492	9.01086	6.67161	7.82781	4.16649	3.66974	3.75406	7.62234	7.46471	7.09736	4.49421	3.55694	3.81856	3.1342
FBgn0250830	4.75896	4.1056	4.83888	2.50278	3.39155	2.90735	5.18809	4.97914	5.01946	4.5182	4.30912	4.55945	4.77102	4.5928	4.94442	4.30603	4.28482	4.02791	2.83947
FBgn0038956	1.154	1.72932	1.67733	0.230865	1.04752	2.17743	1.74674	2.49062	2.38886	2.83706	3.63505	3.40873	2.3835	2.77341	3.24252	7.74382	7.80919	8.24268	0.0447183
FBgn0038953	2.86191	2.83985	2.74014	1.80234	2.1409	1.27064	3.31029	2.83048	2.85767	3.72682	3.45875	3.71917	3.42061	3.30811	3.37682	3.25879	3.23455	3.0309	2.60225
FBgn0250837	2.72762	3.45636	2.0429	5.10157	5.16555	5.04285	2.55087	3.24223	3.42268	2.65358	3.31169	2.86741	4.17264	3.39933	2.87508	3.64198	3.47314	3.51608	7.89469
FBgn0250838	8.21157	7.84718	8.30433	7.87629	7.99033	8.82418	8.01749	7.94673	7.7277	6.50302	6.72674	6.53173	7.39619	7.13579	7.50778	6.43507	6.46719	6.48076	5.27048
FBgn0034918	3.27329	3.88697	2.92957	4.46709	4.32176	4.18105	3.015	3.46346	2.81311	2.74165	2.77898	2.43928	3.08516	3.13888	2.43449	2.72725	2.75627	2.699	6.27254
FBgn0038488	3.17661	2.89402	3.21023	3.74954	4.0864	3.61484	3.12136	2.74253	3.27591	3.31902	3.24663	3.22524	3.24285	3.10891	3.19641	2.76678	2.87681	2.95555	4.01348
FBgn0038959	0.524865	0.327762	0.911151	0	0	0.0511475	0.0848879	0	0.397247	0.24252	0	0.527283	3.36594	1.54757	3.51668	0.99957	0.828874	1.19918	0.157604
FBgn0000459	1.25899	1.11483	1.58701	0	0	0	2.24441	1.37802	1.79318	0.281547	0.340355	0.0940411	2.23824	2.27615	2.5189	0.26197	0.526494	0.434987	0.294736
FBgn0042112	3.94038	4.41264	3.33454	5.67236	5.49311	5.28722	3.24741	3.58122	2.84841	2.35314	2.84457	2.22118	3.01761	3.10274	2.6564	2.32289	2.93017	2.18031	4.3144
FBgn0003598	3.35099	3.17685	3.6935	3.60944	3.75444	3.65575	3.74813	3.22846	4.12556	4.27728	4.1193	4.25897	4.10332	3.78576	3.71184	4.3039	4.05415	4.23992	6.44546
FBgn0042111	5.28336	4.89752	5.19586	2.99715	3.08273	4.12625	4.77902	4.85044	4.73024	4.35406	4.40713	4.13135	5.17128	5.10844	5.16538	4.68825	4.6504	4.64103	4.09471
FBgn0036734	3.57927	3.21947	3.83158	1.9004	2.88646	2.88863	4.41919	3.93873	4.42393	4.5985	4.20231	4.49835	3.87311	4.013	4.20911	4.07395	3.99328	4.05885	3.8588
FBgn0043578	4.97276	6.06531	4.10342	11.3103	11.4876	10.6373	4.58226	6.08526	4.28804	5.23869	6.6409	5.39629	5.63388	6.51316	5.34273	4.97703	5.70709	5.10136	4.61844
FBgn0043575	0.726205	2.41457	0.54898	4.64066	4.86321	4.20568	0.994522	3.42238	0.636711	1.51233	3.89863	1.21182	2.30811	3.78249	1.62257	4.50334	7.82851	2.01313	3.07135
FBgn0052409	3.02991	4.76693	2.87002	5.16139	5.26569	5.13613	3.17601	4.55562	3.28158	3.58941	3.70324	3.59031	3.19036	3.93774	3.02186	4.01054	3.94061	3.87685	5.85507
FBgn0019929	2.18516	2.97696	2.13384	7.26867	7.96355	7.51373	2.1935	3.27008	2.50311	3.34837	4.47631	3.78531	3.11634	3.82229	3.2396	3.035	3.55791	3.28854	2.61378
FBgn0019928	5.10409	6.91228	4.81867	0.829992	1.40673	0.683113	0.707135	2.00033	1.13067	0.781128	1.82447	0.572927	1.23191	3.31838	1.89467	0.854436	1.54261	0.849095	1.61201
FBgn0052407	1.17936	1.53463	1.24234	0.760565	0.821969	0.891963	2.50271	2.69596	2.48346	3.96477	3.48257	3.73614	3.89729	3.8898	3.79233	3.55516	3.66901	4.28645	0.834499
FBgn0283461	12.4193	12.479	12.6096	8.91646	8.77713	9.6865	10.3811	10.8636	10.6153	9.70424	10.2192	10.0899	16.1609	15.9979	16.5188	14.6672	14.6243	15.0338	2.44764
FBgn0028936	2.12932	2.21066	2.2973	6.73091	6.15139	6.82412	3.64857	3.73109	3.29359	2.35144	2.89407	2.76259	6.20792	5.85692	5.98559	2.12438	1.89508	2.25433	2.25055
FBgn0028932	3.47374	3.48323	3.34913	3.69433	3.28235	3.43504	3.33338	3.53475	3.10863	3.47168	3.38343	3.27442	3.19812	3.27509	3.14044	3.74519	3.7876	3.77338	3.05994
FBgn0283467	2.81826	2.71984	2.70776	2.9697	2.84822	3.23763	2.44173	2.69059	2.61672	2.46761	2.46191	2.31062	3.14284	2.8056	2.81331	2.18333	2.55076	2.30203	5.58464
FBgn0028939	0.330462	0	0.360291	0	0	0	1.53015	0.709139	1.53971	0.136855	0.203206	0.295751	3.63501	2.55096	3.97964	0.201034	0.11446	0.150106	0.375494
FBgn0261535	1.68459	3.02537	1.8396	2.80079	2.86806	2.53856	1.98258	2.94824	2.30068	2.44609	2.55727	2.32724	2.42653	2.85523	2.20366	2.89996	2.57231	2.56242	3.59526
FBgn0261534	2.32114	2.37071	2.19739	0.366511	0.428361	0.733953	0.108252	0	0.702324	0.615417	0	0.827213	0.518931	0.275525	0.98857	0.565796	0.869221	1.21825	3.56362
FBgn0022768	3.42665	2.82754	3.73757	1.96257	2.80331	2.80292	4.12242	3.12216	4.07916	4.27168	3.89209	4.16356	4.14218	3.9221	4.29116	4.32767	4.40324	4.33778	5.25965
FBgn0035600	8.642	8.44204	8.59098	9.14139	8.81341	9.5043	8.19273	8.19108	8.07784	6.5667	6.74134	6.58011	7.36301	7.19943	7.47717	6.66019	6.7274	6.94476	7.40975
FBgn0022764	4.5799	4.12945	4.86598	3.12089	3.85007	2.80032	5.77362	4.64884	5.43642	6.25635	5.64785	6.00226	5.1493	5.11242	5.32011	6.1193	5.80461	5.64241	6.0409
FBgn0262714	3.49993	2.97761	3.71359	2.37155	2.92927	2.89867	4.11011	3.44388	4.09908	4.81565	4.47588	4.64747	3.84713	3.74115	4.00208	4.65341	4.48414	4.79524	4.52306
FBgn0029514	3.09696	3.63434	3.02636	4.02632	3.57127	3.48798	2.29614	2.69668	2.61875	2.47202	2.82146	2.42362	2.8347	2.53714	2.55825	2.99765	2.8655	3.13722	4.30565
FBgn0262846	0.78973	0.863203	0.925438	0.452023	0.297898	0.193544	2.16292	2.40591	1.79265	0.738485	0.825793	0.729203	4.81226	4.54431	4.51448	0.464274	0.419151	0.393857	0.0542243
FBgn0262847	1.07651	1.21535	1.10064	0	0.79462	1.37811	1.40487	1.54842	0.910028	2.0381	1.77627	1.36853	0	1.60096	1.49634	2.03068	1.32315	1.77728	0.53799
FBgn0262848	1.7832	1.99484	1.85537	2.09419	2.01343	2.3128	2.07262	2.45708	2.08934	2.23872	2.37281	2.48228	2.14767	2.12631	2.17886	2.22516	2.18998	2.5118	1.19646
FBgn0262849	1.07651	1.21165	1.1101	0	0.83012	1.37811	1.40487	1.54842	0.910028	2.03507	1.77627	1.36853	0	1.61074	1.49634	2.03269	1.33037	1.77728	0.53799
FBgn0043799	0.871687	1.59968	0.923414	1.21062	1.67407	1.28132	1.19339	1.76753	1.23785	1.32973	1.45993	1.36398	1.09974	1.53966	1.09006	1.7076	1.74818	1.5914	1.76824
FBgn0035603	7.10373	7.81152	6.20485	7.38059	6.63095	6.44241	6.12379	6.3715	5.29685	4.60225	4.89728	4.34155	6.3178	6.61777	5.38842	5.19362	5.45041	4.69951	6.08484
FBgn0000473	2.07436	2.72455	2.3205	5.69624	5.82901	5.87444	1.60271	2.38423	1.82977	3.03837	3.44353	3.02812	1.93964	2.23853	2.17035	2.45118	2.16299	2.64466	3.39795
FBgn0000477	2.99574	3.37304	3.18207	9.60763	9.29395	9.74667	2.74474	3.53232	3.1452	3.47255	4.20131	4.28426	3.76316	3.99774	4.14805	3.1645	3.42428	4.01305	4.24125
FBgn0000479	3.6043	4.36665	3.48419	2.8764	2.31791	2.06554	4.65879	3.18345	3.15233	3.52661	2.35926	2.6707	2.97819	2.95559	2.38168	1.37824	1.06066	1.00727	2.9041
FBgn0275436	4.52457	4.51912	4.39836	5.52799	5.06562	5.10041	3.95318	3.90922	4.09623	3.43986	3.53527	3.35653	3.68703	3.84334	3.86599	3.55417	3.79691	3.76105	4.01412
FBgn0034126	1.7714	1.77142	1.84896	7.54845	6.1853	6.62315	2.88486	3.25671	2.66897	2.70659	2.53605	2.5593	5.39204	4.7834	4.97359	2.22676	1.72611	2.02151	0.713693
FBgn0032030	3.63584	3.59816	3.52525	2.69187	3.34606	3.48261	3.58405	3.56642	3.53861	4.15461	4.28761	3.79966	3.70569	3.76276	3.69583	3.93695	4.10376	4.0536	4.38087
FBgn0032031	3.0264	3.11519	2.88121	3.5565	3.2002	3.32377	2.65984	2.73273	2.73988	2.41849	2.75339	2.48248	2.68354	2.63791	2.69023	2.74081	2.60525	2.70695	3.0414
FBgn0004837	0.945216	0.928605	1.25971	0.300282	0.902173	0.644336	1.83506	1.26271	1.58391	2.11923	1.75357	2.00506	1.37589	1.49972	1.77946	1.8793	1.47371	1.64075	2.23765
FBgn0033017	5.4169	4.24366	5.47744	2.68876	3.45556	2.66379	6.12367	6.0404	5.72416	5.38968	5.09339	5.10031	5.36314	5.06842	5.55498	4.97958	4.6256	4.08021	2.17274
FBgn0031468	0.845581	0.940033	1.05865	0	0	0	1.91051	2.95849	2.55482	0.0464398	0	0	0.869129	0.904257	1.25078	0.134086	0.106633	0.0296191	0.0542243
FBgn0031460	1.69963	1.69378	1.37503	8.13344	7.02114	7.22417	2.03348	1.98246	1.69241	2.25324	2.15165	2.14585	2.44196	2.31815	2.40128	1.82406	1.63191	1.71735	1.91746
FBgn0031461	1.82689	1.86325	1.43971	4.48821	6.28724	4.91484	2.24893	2.83059	1.95699	3.32721	3.49904	3.08352	2.65982	2.98227	2.45553	2.63685	2.65618	2.16768	1.86355
FBgn0030332	9.13898	8.29739	8.89404	6.50321	6.05578	6.3296	8.84777	8.44302	8.09019	6.36917	5.96156	5.68951	6.26278	6.14259	6.14231	3.74225	3.42594	3.61524	4.87062
FBgn0039507	4.17842	3.94552	4.50617	2.89085	3.30192	3.41627	4.70828	4.12801	4.79626	5.13341	4.96029	5.16807	4.25111	4.22459	4.53358	3.48909	3.6977	3.41734	3.78863
FBgn0030330	3.04243	3.27068	3.41871	2.28922	2.67703	2.62077	3.42143	3.12877	3.50524	4.27944	4.11873	4.16606	3.05452	3.28985	3.39573	4.03151	4.099	4.08334	5.06313
FBgn0037105	2.97584	2.50051	3.15363	0	1.35254	0.67615	3.43872	2.83216	3.29555	3.41044	3.2202	3.46056	3.14284	3.01327	3.48394	3.01702	2.81186	2.5418	1.13304
FBgn0030336	4.57788	4.22472	4.70014	5.82293	6.12442	6.21948	4.7245	4.55384	4.71093	4.73948	4.67906	4.91797	4.41029	4.21981	4.41048	4.72608	4.70949	4.94444	7.39999
FBgn0037106	1.62918	1.24512	1.86172	0	1.33706	0.387874	2.12011	2.13734	2.48504	2.78147	2.54862	2.74419	2.55397	2.26152	2.38696	2.76153	2.78034	2.65477	3.31107
FBgn0030485	3.08542	2.19817	2.96942	4.23128	4.69037	4.87406	1.90581	2.19302	1.8929	3.04652	3.1648	2.92259	3.15754	3.22592	3.4426	2.76392	2.42287	2.52489	2.22256
FBgn0037108	5.62057	5.65354	5.55873	6.70696	6.55545	6.58823	6.05586	5.98619	5.81486	7.66702	7.65755	7.32474	6.23491	6.20087	6.45287	7.27814	7.26674	7.59095	5.63711
FBgn0030486	3.01988	2.62808	3.32538	1.75367	2.34344	1.59455	4.06508	2.99622	4.06723	4.21993	3.69366	4.01239	3.38138	3.47462	3.68152	3.92715	3.58302	3.45065	4.30764
FBgn0030481	5.62351	5.79956	5.51359	7.45675	7.30749	7.45554	4.72478	5.23878	4.73338	4.42388	4.71664	4.46694	4.70015	4.83882	4.64058	4.50051	4.60636	4.16715	5.49653
FBgn0030480	3.90938	4.25926	3.58834	4.59007	4.20919	4.57419	3.7105	4.19743	3.28777	2.53335	3.05908	2.63121	3.69037	3.67832	3.39534	2.8456	2.99968	2.5337	1.92021
FBgn0030482	2.58465	2.41052	2.41374	5.75673	6.46931	6.0283	3.14443	3.71111	3.12001	4.21124	4.38971	4.39476	3.86712	3.99132	3.77736	4.05421	3.55642	4.1775	2.97737
FBgn0000617	3.75708	4.00622	3.50468	3.72579	3.88081	3.99308	3.36412	3.79218	3.32946	3.63385	3.78622	3.48087	3.40319	3.69752	3.24089	3.63187	3.95979	3.75789	4.56099
FBgn0000611	6.98107	6.27275	7.19806	5.0164	5.38579	5.71378	7.42271	6.78385	7.26271	6.32837	6.12006	6.46987	6.75158	6.49599	7.06264	6.3685	6.46389	6.43447	5.74528
FBgn0267241	0.463973	0.39591	0.563044	0.548702	0.769514	0	1.88592	0.576435	1.41483	0.556521	0.922949	0.743528	0.478405	0.492909	0.192652	0.367308	0.402497	0.363758	0.170433
FBgn0000618	4.64697	4.86153	3.8417	5.94485	5.35448	5.11605	3.66117	3.69011	3.18771	3.89598	3.98436	3.60298	4.01148	3.76835	3.47528	3.76405	3.9389	3.62325	4.22089
FBgn0033820	5.21307	4.7797	5.31069	9.62035	9.85486	10.2823	6.06649	6.65125	6.21694	7.0548	7.13602	7.41229	7.04195	6.56825	7.08539	6.53981	5.90312	6.70514	4.71677
FBgn0033821	3.42626	3.68688	3.18409	10.387	9.37617	9.56578	3.34899	4.06541	3.21309	4.32163	4.59926	4.35004	4.66723	4.37814	4.35875	4.01411	3.62827	3.81545	2.74708
FBgn0261394	6.37891	6.30859	5.93598	7.49846	6.57956	6.70179	5.73848	5.47016	5.36977	6.01521	6.04636	5.89941	5.87504	5.68105	5.61767	6.08134	5.94914	5.93824	7.38792
FBgn0261397	2.71631	2.93201	2.87451	1.11682	2.05187	1.2432	3.62362	3.04625	3.53301	4.9477	4.38814	4.64503	3.25971	3.30678	3.44961	4.20278	4.02244	3.88304	4.08633
FBgn0261396	5.56726	5.4858	5.37606	6.42588	5.75534	5.8819	5.0833	4.82511	5.00038	5.61409	5.5185	5.35297	5.34641	5.37653	5.16747	5.66305	5.67626	5.69203	6.84465
FBgn0037020	4.23009	4.29137	4.08289	4.22844	4.79066	5.16993	4.03857	4.25823	4.1385	4.90261	4.72097	4.62223	3.95863	4.01739	4.0017	4.30402	4.34751	4.43262	4.60746
FBgn0031681	5.10948	4.48812	5.20581	3.3637	4.25626	3.6419	5.46907	3.85386	5.32844	5.11217	4.40599	4.85795	3.85346	3.5931	3.81939	5.10004	5.0871	5.20964	5.4027
FBgn0031682	2.83612	2.75543	2.85957	2.76293	2.96472	3.09994	2.47177	2.5781	2.64271	2.38619	2.48822	2.28372	3.31115	3.12362	3.04759	2.59909	2.34378	2.3512	5.15218
FBgn0031683	3.96934	3.5161	4.30073	2.00383	2.98436	2.76657	4.20468	3.80517	4.18731	3.77441	3.64718	3.65511	3.87552	3.86737	4.22085	3.72207	3.72724	3.69378	2.92481
FBgn0031684	6.96366	6.76192	6.7119	8.03994	7.3679	8.08996	6.4765	6.48059	6.12924	5.26251	5.3775	5.08308	6.11921	5.95945	6.084	5.30084	5.4895	5.37108	5.27893
FBgn0015925	1.66047	1.84794	1.85746	0.976217	1.79204	1.40267	1.93921	2.22312	2.34741	2.03978	2.0243	2.3463	2.33033	2.19943	2.27841	2.17959	2.01753	2.19614	3.31893
FBgn0015924	6.7154	6.17526	6.62053	4.23592	4.37644	4.06375	6.37318	6.13549	6.13778	4.65646	4.72223	4.58384	7.31026	7.09137	7.27789	4.50157	4.54106	4.35741	5.01721
FBgn0031688	3.46109	3.41729	3.30269	0	0.313422	0.524647	2.34649	2.09046	2.35773	0.78934	1.05248	1.03886	1.88277	1.97435	1.49167	0.840873	0.868812	0.642662	0.132824
FBgn0031689	3.35438	3.24459	3.63517	7.42231	7.40487	8.86288	2.89287	4.05935	3.74784	4.13288	4.75345	5.34326	4.10515	4.14797	4.53055	3.85116	3.83483	4.89832	4.46644
FBgn0015929	1.14202	1.46686	1.08017	1.02298	1.85357	1.42229	1.36956	1.65828	3.26034	3.7912	3.75005	3.26369	3.26031	1.97304	1.7104	1.55683	2.07882	1.63246	7.5348
FBgn0030157	3.51515	3.0678	3.88186	7.79335	8.27664	8.09569	4.57783	5.3317	4.62654	6.45649	5.66314	5.99828	5.59584	5.41641	5.56818	4.7919	4.4924	4.43341	2.30751
FBgn0014032	5.3968	5.01506	5.29346	5.2922	4.56138	5.71526	5.0693	4.79953	5.12653	4.52723	4.65177	4.49087	4.52705	4.32272	4.72103	4.38483	4.37382	4.4858	4.50908
FBgn0052699	3.39014	3.48607	3.35831	0.473878	0.952602	0.445618	4.77653	4.39061	4.45247	4.35967	4.02424	3.90371	4.86636	5.05277	4.92527	4.04757	3.60526	3.69011	4.61124
FBgn0041630	4.56122	4.20371	4.49344	5.69686	5.20005	5.53657	3.91786	3.82546	4.09806	4.83707	4.87716	4.72579	4.98348	4.83594	5.52263	4.97537	4.99854	5.43219	4.31336
FBgn0014031	4.28217	4.54633	4.53285	10.5881	9.76781	10.5223	4.43089	5.03464	4.9125	5.4189	5.585	6.20181	5.50281	5.34669	5.88241	4.95943	4.61483	5.74403	5.04573
FBgn0263113	0.113707	0.174066	0.15568	0	0.582341	0	0.0491172	0	0.158079	0.747008	1.03601	1.16663	3.66064	3.15824	3.87814	0.601649	0.898845	1.0574	0.11518
FBgn0030159	4.53174	4.96848	3.73611	0.308413	0.466333	0.224285	1.65106	1.31287	1.03161	1.76547	1.7421	1.05686	4.42157	5.351	3.60724	2.93448	2.54413	2.24761	1.23608
FBgn0037028	1.45949	1.04146	1.36493	0.452023	0.267144	0.284702	2.96624	2.22391	3.01042	0.791774	0.452954	0.280601	2.12286	1.84425	2.37662	0.903143	0.599645	0.647099	4.95936
FBgn0030310	3.76228	6.09615	2.4657	7.39052	6.91484	6.93538	5.17548	5.93531	3.103	2.8256	4.08134	2.85715	3.9412	5.38758	3.50836	3.32525	4.18258	2.76386	1.68142
FBgn0266707	2.28957	2.13765	2.49213	1.36379	1.81948	1.62505	4.2654	3.63948	3.00827	3.62815	1.75629	2.97183	2.74124	2.76707	1.89212	2.96065	1.83865	1.54388	0.211285
FBgn0266705	1.06442	0.60025	1.27257	3.10786	2.13829	2.38554	0.487454	0.530727	0.469907	0.234841	0.40597	0.12898	1.62588	1.47194	2.05446	0.957404	1.329	0.955527	0.0219349
FBgn0266700	2.02707	1.88802	1.72057	0.604656	0.76611	0.557706	1.55386	1.43257	1.45001	1.14039	1.12853	1.03044	1.39712	1.47399	1.2645	0.719358	1.25819	1.3629	0.677326
FBgn0037472	4.87738	5.63505	4.58131	4.13067	3.84515	3.89738	4.91001	5.49779	4.45512	4.94861	5.24745	5.0221	4.938	5.6442	4.9583	5.06385	5.51825	5.11781	5.77525
FBgn0031150	4.47039	3.55675	4.68736	1.82323	1.9671	2.08328	5.60213	4.33864	5.41403	4.28197	3.23629	4.26631	4.90445	4.46538	5.14378	4.11151	2.89193	3.23673	2.63143
FBgn0034307	1.63868	2.25462	1.76859	2.29127	2.53781	2.58481	1.60904	1.76173	1.72305	1.61182	1.86513	1.48869	1.77229	2.09459	1.67347	1.66532	1.73009	1.68989	3.00437
FBgn0050460	4.57929	3.96939	4.71442	0.175828	0.426199	0.243535	6.24234	5.0522	6.35822	4.86622	4.03247	4.46166	4.05175	3.69128	4.21905	3.38558	2.4796	2.19495	0.802662
FBgn0085339	5.38156	5.77387	5.06779	6.86095	6.51389	6.67955	4.67791	5.26772	4.64369	4.54654	4.59529	4.30499	5.01849	5.00747	4.49988	4.56774	4.66699	4.54771	6.86746
FBgn0050467	1.52398	1.6685	1.29524	0.837379	1.5541	1.4278	1.8239	1.78692	1.99622	1.83144	1.63294	1.67332	1.57062	1.57095	1.38962	1.8897	1.98261	2.0204	3.74021
FBgn0263398	4.95042	4.92841	5.06368	4.53619	4.8774	4.99269	4.89312	5.00312	4.89194	7.13478	6.6565	6.52151	4.79583	4.92047	4.89637	4.9966	5.25385	5.34883	4.99773
FBgn0263397	2.5141	2.21367	2.69873	4.21647	4.52891	4.28038	2.4107	1.83214	2.12028	2.80207	2.49853	2.2775	2.16542	2.06745	2.02318	1.73839	1.64822	1.58719	1.2647
FBgn0263396	6.51003	6.49271	6.10675	4.67085	5.56048	5.20944	7.93202	6.40758	6.62152	6.75372	6.11124	6.38155	6.14098	6.19352	5.95562	6.74931	6.03752	6.20138	6.96324
FBgn0263395	3.67011	3.13775	3.92829	2.52147	3.28598	2.44632	6.00416	4.43026	5.95791	4.10964	3.64431	4.14624	3.65179	3.51085	3.9959	3.8837	3.50847	3.71003	3.77566
FBgn0085330	0.794109	1.47927	0.618792	0.760565	1.06092	1.1824	0.491665	0.673597	0.268464	1.19632	1.22543	0.96244	2.94375	3.09341	2.67313	2.77712	2.74237	2.51513	0.278606
FBgn0040466	4.07715	3.95006	3.98711	2.18212	2.33149	2.3611	4.02331	4.10791	3.73245	2.07221	2.36092	1.75906	3.83732	3.77093	3.26725	1.89268	2.00143	1.60288	2.41071
FBgn0263391	6.77099	6.05369	6.86647	4.10988	5.17193	4.81095	7.73998	6.91963	7.33851	5.60278	5.12625	5.3426	6.33034	6.47123	6.35369	5.0904	4.85401	4.60612	7.24283
FBgn0263390	1.98222	2.40414	2.27707	7.03138	6.58353	6.86408	1.74163	2.50151	1.94948	3.3534	3.82986	3.6607	3.13529	3.67923	3.19205	3.07302	3.32647	3.39997	3.43224
FBgn0033350	3.72151	4.03058	3.56717	4.72023	4.72582	4.57625	3.86647	3.9381	3.81768	5.16345	5.33098	4.91341	4.04073	4.50534	4.11668	4.72588	5.08952	4.89906	4.212
FBgn0033351	3.86804	4.53099	3.80405	5.76885	5.54904	5.42716	3.83343	4.19654	3.86669	4.07807	4.42971	4.06642	3.63294	3.91151	3.6168	4.20969	4.37746	4.23917	5.32853
FBgn0033352	3.86403	3.17215	4.20756	3.32659	3.74497	3.39454	4.51912	3.4957	4.47521	4.92483	4.42066	4.89463	4.38669	3.98985	4.4609	4.89676	4.58202	4.70177	4.3742
FBgn0036273	2.19879	2.5174	2.32284	0.617802	0.445346	0.804616	1.6718	1.49881	1.65694	1.25405	1.10153	1.09053	2.00004	2.416	1.79899	1.21751	1.10785	1.07494	1.65613
FBgn0034300	1.8464	1.63866	2.15738	0.826096	0.826304	0.258564	3.15687	1.73891	2.87843	3.16614	2.57812	2.86898	2.28805	2.45684	2.60664	2.83191	2.24007	2.01985	2.58777
FBgn0033356	5.15326	4.81999	5.46435	5.4875	6.3337	6.02292	5.56779	5.39601	5.4566	5.72732	5.91876	5.79189	4.47625	4.52792	4.63661	5.02189	4.54798	4.7985	3.65105
FBgn0033357	6.36851	6.34162	5.99094	7.23891	6.91663	7.4737	6.35627	6.40001	5.5471	6.04528	6.36177	5.84055	6.19311	5.97878	6.00028	6.17368	6.21286	6.15061	3.89083
FBgn0033358	2.58916	2.25658	2.06362	0	0.134512	0	0.225091	0.422834	0.440754	0.359938	0.171198	0.122461	0.654741	0.538833	0.551049	0.0413103	0	0.0687264	1.25935
FBgn0011592	3.57304	3.65814	3.83605	0.93316	1.3191	0.668114	5.19554	3.88899	4.85367	3.8738	3.54434	3.9766	3.00544	3.32013	3.57622	4.57345	4.30674	4.60889	1.99023
FBgn0010198	10.2817	10.3801	9.77561	12.4888	12.1321	12.4081	9.71392	9.76886	9.04115	10.4892	10.6649	10.3643	9.64197	9.4452	9.43618	10.2764	10.1775	10.4399	9.80041
FBgn0034814	2.90252	3.65031	2.84323	3.46605	3.30164	3.51052	2.30717	3.00364	2.45866	2.68229	2.93246	2.52922	2.67375	2.93922	2.68573	3.13306	3.03123	2.98752	4.63602
FBgn0010194	0.510153	0.368956	0.399946	0.0905911	0.447466	0.123582	0.408143	0.31131	0.500462	0.695195	0.462852	0.629508	0.726086	0.670275	0.669626	1.43156	1.79077	1.85803	2.69701
FBgn0005624	0.59432	0.46449	0.830676	0	0.0946517	0	1.9051	0.982135	1.45776	2.56492	1.80056	2.33979	1.23636	1.66646	1.69093	2.39079	2.00557	1.65701	1.76432
FBgn0038302	2.92144	2.42745	2.44933	5.73282	4.72981	5.52648	3.53224	3.05278	2.85627	1.63759	1.76465	1.76966	3.31512	2.58502	2.91399	1.8554	1.30154	1.83743	3.01646
FBgn0038303	3.27102	3.11515	3.63698	1.99221	3.09759	2.95363	3.56987	3.08885	3.69506	3.41598	3.34516	3.3666	3.27738	3.29355	3.44082	3.62398	3.75517	3.68835	4.36738
FBgn0038300	2.54012	2.67577	2.65576	2.12516	2.34251	2.23704	2.26667	2.35202	2.70316	2.39491	2.62992	2.39313	2.59539	2.44774	2.3096	2.96362	2.94804	3.01737	5.29523
FBgn0038301	2.2672	1.80288	2.46725	0.877891	1.76858	1.4469	2.70487	2.1178	2.67334	2.33826	2.27463	2.14337	2.49869	2.20323	2.44579	2.38977	2.28989	2.21278	2.76678
FBgn0038306	3.05881	4.59147	3.11412	3.71718	4.1561	3.87484	3.03934	4.35298	3.24558	3.00101	3.42928	3.20385	3.28514	3.8186	2.99795	3.46279	3.50095	3.27107	4.88005
FBgn0038307	3.3666	3.91643	3.1935	3.44165	3.84567	3.85373	3.03931	3.75115	3.19435	2.42805	3.07437	2.41997	3.35946	3.43204	2.92617	2.77392	2.88982	2.66357	5.18431
FBgn0038304	3.71652	3.96043	3.86765	3.50243	3.57834	3.64182	3.85034	3.85429	3.98471	4.37234	4.32801	4.32963	3.53669	3.97637	3.62404	4.48827	4.85075	4.85516	4.90418
FBgn0031437	4.67426	5.24807	4.3908	4.42871	4.3207	3.89653	4.68999	4.82556	4.51112	4.61929	5.01141	4.64745	4.68919	5.1456	4.77477	4.69807	5.00784	4.76605	4.4925
FBgn0033688	4.24369	4.3122	4.61598	3.30618	4.59315	3.29266	4.76242	4.64156	5.21355	5.70098	5.39323	5.5744	4.90624	5.0979	5.00191	5.62788	5.41173	5.39706	6.1117
FBgn0033683	5.49921	5.14167	5.24186	6.38674	5.89099	6.79976	5.31147	5.2083	4.71995	5.98564	6.00938	5.69232	5.69606	5.56222	5.64809	5.55615	5.64491	5.58392	3.38536
FBgn0066303	4.22259	4.61966	4.29786	3.96352	4.27244	4.02941	4.30607	4.3812	4.44793	4.41238	4.51529	4.45556	4.32219	4.60907	4.48569	4.66217	4.52852	4.62195	4.3864
FBgn0011227	8.59333	8.67468	8.08135	9.80103	9.14285	9.26731	7.53646	7.68801	6.95631	6.4785	6.15056	5.74517	7.30495	6.98661	6.833	6.48569	6.48813	6.35427	5.20197
FBgn0033686	3.25582	2.6345	3.04524	3.65627	3.16706	3.53384	3.75597	3.40275	3.23033	3.16271	2.96274	3.18459	3.11123	2.4038	2.8272	3.4586	3.44264	3.48449	2.3826
FBgn0266376	6.3893	8.26086	6.59794	1.4298	2.62559	2.6177	5.65098	7.74325	6.5016	6.87878	7.40826	7.054	4.53615	6.26709	4.95504	7.91012	8.34421	8.34747	2.63106
FBgn0266377	4.10631	3.34809	4.7407	1.43352	1.85384	2.39576	5.55715	3.77447	5.29954	5.21341	4.88699	5.00847	7.30425	7.29126	7.87329	5.44371	5.12266	5.07614	2.10849
FBgn0013563	2.48793	2.72447	2.57055	2.9693	3.32545	3.12233	2.32336	2.15154	2.46938	2.66554	2.71126	2.66867	2.58366	2.40404	2.55877	2.5798	2.66947	2.61093	4.1239
FBgn0033178	4.01732	3.92367	3.79541	6.124	5.6016	5.78714	3.70109	3.621	3.47579	2.78466	3.14271	2.78833	3.37205	3.34471	3.19011	3.2405	3.47982	3.28628	4.7983
FBgn0036419	0.692664	2.46744	0.732439	0.175828	0	0.0504182	1.73975	2.22714	1.07972	0.463461	0.561607	0.311175	1.24307	2.01689	1.12066	0.431958	0.433058	0.786416	4.07837
FBgn0051849	2.64758	2.60795	2.39291	0.300282	0.589358	0.575563	2.26821	2.43903	2.22465	1.15028	0.963948	0.877486	2.53349	2.41322	2.02316	1.01224	1.10678	0.977347	3.63034
FBgn0045064	1.89875	1.52346	1.85625	4.8244	4.16538	4.63992	2.62595	2.60369	2.33484	2.68906	2.42403	2.37867	4.23114	3.50587	4.0513	3.92842	3.73758	3.66514	3.2509
FBgn0045063	3.52009	3.10035	3.81743	2.92207	2.9761	1.87498	3.88415	3.44452	3.94723	3.95348	3.40446	3.71792	3.9666	3.91931	4.11995	3.80772	3.76867	3.67362	3.23777
FBgn0032889	4.95383	5.32132	4.88265	9.25716	8.39248	8.84352	4.42852	4.80546	4.6629	5.1388	5.64329	5.71779	4.77098	4.80272	5.08654	4.49064	4.24886	4.8835	4.82489
FBgn0032886	3.78599	3.74176	3.5156	0.589313	0.595715	0.465252	5.34707	4.48388	4.53074	1.52658	1.48711	0.995162	3.42934	3.38111	3.27577	0.983006	0.713396	0.406655	2.80818
FBgn0032884	6.68912	6.35655	6.0961	6.34285	5.95669	6.71386	6.09293	5.72784	5.40418	5.75432	5.91322	5.63425	5.9895	5.7709	5.58442	6.21245	6.14753	6.10771	6.12496
FBgn0032883	2.25362	2.24982	2.47522	1.30558	2.38572	2.21454	2.37678	2.15687	2.59972	2.8982	2.83087	2.83653	2.44183	2.41195	2.43755	3.07435	3.0942	3.05283	4.43717
FBgn0032882	4.01493	4.12574	4.31268	3.68095	3.93561	4.05497	4.12387	4.08658	4.34769	4.47059	4.65496	4.53099	4.05586	4.32072	4.1101	4.69966	4.57841	4.77327	5.32881
FBgn0032881	3.69381	3.79477	3.50121	5.83725	5.52917	5.62369	2.98118	2.99073	3.05995	3.05822	3.33837	3.11038	3.55199	3.56581	3.56918	2.90225	2.79606	2.8973	3.60214
FBgn0032880	5.91708	5.44482	5.98686	3.69879	4.44936	3.5325	6.61902	6.04508	6.54447	7.65814	7.31698	7.45228	6.46856	6.32259	6.60202	6.98019	6.98992	6.82081	4.11415
FBgn0004577	0.108223	0.0170512	0.112654	0	0	0	0	0	0.132583	0.0246252	0	0.0587525	5.50659	4.67328	5.06772	0.421399	0.0209954	0.180324	0
FBgn0004574	6.49218	6.80755	6.53781	5.42753	5.14609	5.37404	6.08518	6.37673	6.14508	5.53522	5.57673	5.51959	5.9233	6.2942	6.06402	5.77612	6.20569	6.14413	6.0922
FBgn0004575	1.61096	1.99857	1.27865	0.404938	0.11959	0.751019	1.8432	1.91359	1.61331	5.35051	4.19179	4.72877	1.34583	1.4147	1.07146	3.74241	2.03209	2.11083	0.303717
FBgn0250791	6.2153	6.03901	6.15455	5.8007	5.5524	5.68497	6.4446	6.10958	6.21652	5.6408	5.63079	5.52496	5.876	5.74621	5.94181	5.57262	5.82538	5.64944	5.17967
FBgn0013749	7.75526	8.21363	7.06936	9.00877	8.645	7.9608	7.32286	7.62737	6.5399	8.47906	8.40576	7.9481	7.43113	7.66461	6.88324	7.77442	8.28127	7.65589	5.79823
FBgn0039495	2.36488	1.81419	1.96313	0.332536	0	0	0.200408	0.246118	0.378594	0.369991	0.321817	0.210189	0.223913	0.387261	0.295689	0.790751	1.18492	0.59762	0.900388
FBgn0030790	2.9649	2.53914	3.14823	1.61879	2.41982	1.66052	3.77191	2.88526	3.73751	3.79454	3.3368	3.77545	3.59334	3.16438	3.46693	3.72914	3.42644	3.35436	5.36699
FBgn0026196	3.35666	5.59104	3.07065	5.17046	5.8739	5.58003	3.55494	5.32085	3.64877	4.41946	4.84765	4.70542	3.71217	4.9006	3.413	4.8315	4.66289	4.73288	6.23609
FBgn0013746	5.24489	5.05502	5.29302	5.23179	4.99834	5.06425	5.33618	5.43453	5.23795	5.04739	5.08753	5.09654	5.36628	5.18689	5.33291	5.04116	4.93604	4.83385	4.23364
FBgn0030792	5.03556	5.19844	4.59792	5.86455	5.4564	5.21609	4.47021	4.64954	4.30138	4.98804	5.25725	4.887	4.82856	4.68197	4.70538	4.95544	5.15208	4.82541	5.44256
FBgn0266492	6.55206	6.40724	7.13206	1.33772	1.23115	1.38817	8.2964	7.71934	7.52798	4.32919	3.69185	3.51678	6.11584	5.44777	6.2438	2.38707	1.47738	1.78345	1.09018
FBgn0032085	0	0	0	0	0	0	0	0	0	2.20324	2.32217	2.56316	0	0.013788	0.192559	0.072375	0.0836075	0.169145	1.385
FBgn0032084	2.78698	2.51262	2.68868	1.68253	1.10349	1.69249	3.99077	4.11561	4.20229	1.34749	1.54454	1.09363	2.69667	2.61486	2.55318	2.4997	3.46116	2.83623	1.82966
FBgn0032083	0	0	0	0	0	0	0	0	0	0	0.131824	0	0	0.0676138	0.0378157	0.914695	2.3387	0.296894	0.0327785
FBgn0026192	4.55745	3.74026	4.65961	1.82412	2.52554	1.69565	5.51076	4.79948	5.38677	4.79585	4.31055	4.81728	4.47541	4.15978	4.7492	4.50756	4.14308	4.03316	4.58053
FBgn0039492	5.57705	5.19708	5.86649	3.20625	4.07603	4.19246	6.96924	6.1573	7.03793	7.19557	6.66248	7.35762	5.2903	5.26678	5.73207	6.42282	6.56481	6.60066	5.78473
FBgn0265974	2.04168	1.87127	2.22914	2.67527	3.2456	2.33359	3.22008	2.55899	3.1493	2.8873	2.2273	2.58423	2.508	2.456	2.57174	2.6542	2.24506	2.49229	2.57741
FBgn0265977	0.327394	0.076142	0.49098	0.689981	0.971302	1.66798	0.640989	0.779672	0.553422	1.56619	1.84679	2.06899	0.496419	0.509143	0.511254	2.8089	2.10513	2.69133	0.33454
FBgn0034756	2.27668	2.58287	2.10265	6.5973	5.86805	5.97674	3.87742	3.88699	3.32437	5.55291	6.14622	5.7722	3.65374	3.46452	3.30478	5.82346	5.94326	5.52834	2.04017
FBgn0025352	6.77563	7.12482	6.67696	8.92054	8.94538	9.29153	6.3489	6.52542	6.5414	6.03198	6.4161	6.20793	6.46632	6.54217	6.51231	6.10717	6.33646	6.32588	7.78444
FBgn0025608	5.91278	5.71608	6.01767	6.06947	5.82165	5.87709	5.97136	5.77933	6.00737	5.75407	5.63995	5.67485	5.73609	5.66128	5.85493	6.11003	6.03092	6.17094	6.31226
FBgn0266958	1.98441	2.27546	2.09722	0.991449	1.23238	1.18596	1.58829	1.6343	1.67532	1.19253	1.17052	1.30361	1.47334	1.43632	1.56385	1.5724	1.28299	1.48037	2.46671
FBgn0262560	2.33097	3.77594	2.35591	3.44902	3.88665	3.51099	2.4219	3.74761	2.80057	2.85308	3.24804	2.87526	2.73515	3.29826	2.5596	3.30513	3.19106	3.06937	4.40393
FBgn0028582	5.62055	4.87929	5.79247	3.73887	3.91311	3.88747	6.21439	5.43145	5.92076	5.74342	5.07856	5.58608	5.5145	5.51823	5.77712	5.48004	5.16771	5.11425	4.71209
FBgn0039239	2.22763	2.07161	1.3175	8.96946	7.82763	7.30175	2.17618	2.37028	1.55516	2.71359	2.80881	2.2525	3.08861	2.84906	2.41744	2.38659	1.97895	1.85479	1.48326
FBgn0039238	3.02958	3.17798	2.23828	6.0653	6.11185	6.22582	1.82153	2.14568	1.88857	2.95888	2.97534	3.00542	2.47827	2.65338	2.44585	2.28589	2.00333	2.38931	1.76545
FBgn0032229	5.59831	5.44343	5.60481	5.86284	5.9243	6.57448	5.35791	5.45102	5.31524	5.16722	5.27195	5.11852	5.42779	5.29724	5.62246	5.2461	5.34942	5.42724	4.73763
FBgn0035016	3.33604	2.93434	3.33232	1.1593	1.22992	0.930351	4.2199	2.85165	3.6093	3.5531	2.35252	2.68609	3.35178	3.18074	3.22652	3.07085	2.42041	2.11151	3.37603
FBgn0032223	2.97426	2.51148	3.11261	0.971104	1.17321	1.15214	4.31253	2.82558	3.82742	3.66587	2.59246	3.11545	2.88048	2.85063	3.09077	3.21142	2.00223	2.1907	1.80148
FBgn0039942	2.7976	2.91426	2.82249	1.39586	2.51013	2.25376	2.78054	3.16554	3.17671	2.89983	3.2323	2.95108	3.14062	2.86265	2.62831	3.27834	3.22741	3.16003	4.42755
FBgn0039234	3.61642	3.64247	3.81968	2.42218	3.34163	1.99601	4.34389	3.90602	4.44713	5.08194	4.69077	5.12741	4.21955	4.43909	4.41327	4.44772	4.49762	4.28599	3.8355
FBgn0039944	4.90091	3.54037	4.91662	3.40965	3.04744	2.69556	4.97668	3.79816	4.67377	4.83698	4.58377	4.60291	4.16803	3.94295	4.8686	5.35592	4.49372	4.71685	3.35065
FBgn0267026	1.83752	2.10509	1.99696	0.624331	0.391529	0.402503	0.876394	0.756542	1.00202	0.78206	0.763997	0.774222	1.17443	1.45986	1.15254	0.937032	1.06279	0.90514	0.3047
FBgn0029723	4.18462	3.76706	4.02299	0.175828	0.183474	0.400219	3.4909	3.24908	3.49309	1.58276	1.47036	1.3526	4.26779	3.53555	4.12863	1.53291	1.54237	1.22794	1.64553
FBgn0026372	9.88602	9.96658	9.83031	12.0409	11.8469	11.8658	9.76847	9.70248	9.69356	10.5252	10.9141	10.7997	9.72749	9.65	9.80444	10.3253	10.2012	10.6239	9.11671
FBgn0267029	2.52926	1.5105	2.48577	1.327	1.071	1.40812	2.85668	2.03289	2.46911	2.69601	2.31666	2.63507	2.68496	1.94533	2.66279	1.95059	1.6548	1.26762	0.1114
FBgn0035688	3.55506	3.3401	3.61713	2.45001	2.26202	1.45632	4.95578	3.18335	4.05601	3.92314	2.92081	3.47226	3.45056	3.03486	3.44736	3.55375	2.72586	2.59848	3.2211
FBgn0035689	0.849958	0.479351	1.01688	0.256309	0.460756	0	1.88336	1.19798	1.77518	1.4862	1.3881	1.40355	1.07942	1.18475	1.40445	1.2097	1.34187	0.808367	1.42116
FBgn0023514	4.2797	4.93058	4.09671	5.56576	5.41251	5.54599	4.05791	4.31691	4.16398	4.11234	4.21329	4.05159	3.90425	4.111	3.64585	4.48963	4.57495	4.51351	6.02633
FBgn0262003	6.71993	6.52482	5.28956	2.11823	2.43799	2.67431	8.70013	8.45386	6.88499	10.1759	10.1082	9.50844	5.23439	4.68037	4.13609	3.246	2.79759	2.26969	1.21072
FBgn0262867	1.95592	1.43702	1.95942	0	0.603937	0.362993	0.871878	0.569712	0.691236	0.680668	0.422495	0.347787	3.67665	3.76772	4.10641	2.18139	1.60718	2.14673	0.430896
FBgn0044810	2.23039	2.9492	1.105	9.54336	8.65068	7.40862	2.33162	3.00923	1.19384	2.52363	3.39538	2.10681	3.8155	3.3638	2.13114	3.1681	2.56133	1.58706	1.06059
FBgn0044812	4.11961	4.39029	3.35296	10.2506	9.3106	9.04655	5.05561	5.71309	3.61279	5.65022	5.88611	5.08149	6.29142	5.89944	5.01236	5.62873	4.95049	4.36971	0.989084
FBgn0016047	0.25903	0.273227	0.163809	4.17048	3.18236	3.80043	0.0364132	0.322304	0.21081	0.524375	0.51736	0.683359	0.5224	0.353835	0.537235	0.379444	0.111105	0.438571	0.330939
FBgn0016041	4.61601	5.07384	4.77272	5.04928	5.72494	5.52635	5.03812	5.20067	5.22439	4.2432	4.2996	4.49549	4.70421	4.95144	4.82668	4.15102	4.16892	4.24737	5.7881
FBgn0003366	4.15524	3.26353	4.11289	3.40213	2.70246	2.87106	2.52276	2.25432	3.55716	1.07717	1.02515	0.960388	1.47421	1.1894	1.7459	1.31605	0.749998	1.09744	3.81847
FBgn0000261	5.38151	4.84324	5.79557	6.35688	6.72586	7.49697	6.54609	6.18399	6.72569	6.62029	6.67086	6.83129	5.94798	5.86844	6.41778	7.05351	7.01392	7.26002	6.76613
FBgn0003360	11.405	11.2307	11.3899	11.6434	11.8341	11.8733	11.1996	11.345	10.925	9.59492	9.69603	9.58909	10.2447	10.1139	10.2832	9.40237	9.39653	9.5532	10.3403
FBgn0035287	3.92543	4.3152	4.18218	0.6026	0.751945	1.13871	2.64779	2.67735	2.97397	1.91496	2.24962	1.62749	3.97088	3.96704	3.58796	1.89453	2.22666	1.72954	1.67077
FBgn0015584	0.0223038	0.0410749	0	0	0	0.253624	0	0	0.0424525	3.42819	3.04973	2.78349	0	0.169717	0	0.0729099	0.0216643	0.0586654	0
FBgn0038548	0.844904	0.828711	1.08859	0.230865	0.627094	0.603325	1.21349	0.893468	1.24743	1.92505	1.80779	1.95749	1.46627	1.31623	1.35079	1.80081	1.73447	1.5075	2.34745
FBgn0038549	0.745636	0.762635	0.864684	0.230865	0.293989	0	1.3013	1.05237	1.558	1.24966	0.947853	0.944338	1.05983	1.00662	1.06528	1.04796	1.01006	0.762312	2.58558
FBgn0262567	3.28226	3.04877	3.02991	2.59186	2.25138	2.52377	2.61243	2.37459	2.38872	2.66382	2.80141	2.37237	3.01635	2.6167	2.60768	2.98917	2.74241	2.8794	2.3478
FBgn0027535	2.75324	2.50045	2.82259	3.71671	4.15573	3.74429	3.11417	2.65766	3.07232	2.85066	2.73483	2.95099	2.97166	2.91614	2.92954	2.82467	2.68063	2.68202	2.66039
FBgn0035023	4.88159	4.24519	4.80526	0.175828	0.84192	0.759939	5.39696	4.55644	4.7327	2.85331	2.12306	2.29826	5.48251	5.90771	5.85574	1.57065	1.16815	0.948107	0.720881
FBgn0035024	4.50789	4.54592	4.92119	3.73713	4.72668	4.25589	4.84517	4.51309	4.96273	6.10002	5.73906	5.99527	5.01873	4.95802	5.19238	5.43968	5.44374	5.47538	5.51631
FBgn0038545	4.52376	4.8961	4.34044	0.746802	1.16894	1.09137	4.2322	4.52447	4.00583	3.64413	4.11366	3.73694	4.10758	4.43085	3.84817	3.76896	4.26317	3.47869	3.88601
FBgn0038546	3.82174	3.75819	4.0576	3.16101	3.17067	3.3652	3.95668	3.60268	3.99551	4.73185	4.57202	4.61832	3.80789	3.87856	3.99505	4.79093	4.79806	4.74238	4.66836
FBgn0038472	2.85042	2.7832	2.72328	1.77326	2.29189	2.84602	2.72712	3.01553	2.76222	2.84969	2.84376	2.70887	3.09085	2.93872	2.81349	3.16635	3.14487	2.99828	3.22513
FBgn0261258	6.81	6.50873	6.47473	2.16516	2.28366	1.71972	8.79832	7.25239	7.82136	4.37374	3.71655	3.32877	5.18174	5.76861	4.75362	3.89277	3.05363	2.29851	0.995474
FBgn0266579	5.52303	4.46601	5.4753	2.5571	2.17634	2.01181	6.22713	4.46683	5.5556	4.03904	3.01777	3.52665	5.18226	4.70959	5.05337	3.94716	2.31331	2.79167	0.519748
FBgn0029980	3.91353	4.41806	3.66295	5.34021	5.58876	5.1344	3.51261	3.90692	3.47172	3.8206	4.33114	3.66579	3.398	3.69941	3.25458	3.82261	4.19369	3.86868	5.11426
FBgn0261703	4.75751	3.42885	4.94438	3.55538	3.27166	3.38265	5.20184	3.52047	4.89604	4.53241	3.52753	4.33897	4.4432	4.03697	4.48965	4.66819	3.98867	4.44587	2.03813
FBgn0031855	4.5001	4.36142	5.14062	0.157939	0.442536	0.182207	3.73177	3.83447	3.84751	1.39256	1.5892	1.50051	4.11112	4.2501	4.09214	1.02729	0.845501	1.26177	0.322484
FBgn0031857	4.87539	4.02369	4.99376	0	0.134512	0	4.80767	3.22354	4.09488	2.05421	1.58096	1.54157	4.68969	4.36745	4.48752	1.64768	0.960666	1.1035	0.64362
FBgn0031498	3.34905	3.98742	3.30177	5.10312	4.76568	4.61554	2.94154	3.5907	3.11265	3.05493	3.53353	2.89819	3.04436	3.23653	2.96667	3.0295	3.21527	2.87866	4.29525
FBgn0031850	2.57507	1.27429	2.58493	0	0.577185	0.214178	1.08	0.421341	1.15835	2.19586	1.41254	1.87058	2.2501	1.51192	2.83078	4.35	3.32329	3.67594	0.65539
FBgn0038473	4.03564	4.74107	3.95714	4.20655	4.85494	4.5752	4.41767	5.30258	4.39267	4.44846	4.40507	4.51596	4.32552	4.52281	4.21666	4.45441	4.22661	4.32512	4.43267
FBgn0030945	2.88362	3.05772	3.04857	3.20005	2.9587	2.98603	2.47867	2.63445	2.8731	2.54416	2.76424	2.44273	2.88964	2.77604	2.77433	2.74918	2.79517	2.8556	4.82713
FBgn0266181	1.90509	1.84365	1.20818	0.7899	0.669937	0.658987	2.57533	1.41952	1.59965	0.961421	0.92622	1.15355	2.82317	2.50532	2.06422	1.23429	0.551313	0.792928	0.199206
FBgn0031149	3.99672	4.85108	4.01332	4.09729	4.59359	4.65982	4.35634	4.77685	4.72521	5.7577	5.985	5.93552	4.6813	4.95736	4.72332	6.14018	5.81559	6.07807	7.06794
FBgn0036196	4.64511	3.42761	4.88758	2.34672	2.61217	2.81289	5.11304	3.76862	4.5947	3.87601	3.49436	3.67804	4.21996	3.37321	4.39822	3.69585	3.61457	3.59351	2.15455
FBgn0034649	1.49696	1.2282	1.25061	0	0.837631	0.627952	1.46203	1.37173	1.54483	0.945188	1.20929	1.38151	1.70554	1.43925	1.3505	1.43198	1.48104	1.51061	1.08003
FBgn0034647	4.47832	4.84361	3.38166	0.7899	1.2892	0.974161	4.14621	4.80384	2.57355	2.12282	2.35455	1.78006	3.95862	4.49164	4.01869	1.44114	1.89432	0.973978	0.770706
FBgn0034310	2.155	2.67595	2.42444	2.58131	3.44238	2.87476	2.31947	2.71713	2.83164	3.43156	3.58374	3.39549	2.81263	2.8364	2.53084	3.50558	3.53206	3.55196	5.18615
FBgn0034645	7.91274	7.85771	7.33546	9.54197	9.09852	9.06676	6.87158	6.76309	6.34366	5.28011	5.75933	5.17994	6.4453	6.09238	6.26961	5.87795	6.00953	5.76651	6.32011
FBgn0267001	2.70074	2.44764	2.64893	0.175828	0.11959	0.135591	4.2907	2.96516	3.48013	0.452279	0.177427	0.342136	0.658725	0.709195	0.574425	0.346012	0.238091	0.370296	0.762972
FBgn0034315	4.79578	5.07633	4.54702	6.22572	5.57275	5.46942	4.35123	4.40623	4.23672	4.82197	5.02314	4.63647	4.63853	4.82324	4.53224	4.54733	4.80883	4.49843	5.59739
FBgn0034314	1.57166	1.86168	1.48981	1.91011	1.24292	1.50228	1.50823	1.56323	2.05283	0.959895	1.24137	1.25797	1.8873	1.67267	1.44852	1.36646	1.75286	1.46134	4.75282
FBgn0031145	5.82235	5.94807	5.66199	4.45467	5.4432	5.07375	6.14821	6.48383	5.88954	5.6065	5.53379	5.48715	5.73999	5.75534	5.51429	5.37429	5.59749	5.09523	4.67147
FBgn0015245	7.03353	7.97542	6.99465	9.60236	9.74187	9.79034	5.87495	6.97013	6.44834	5.51937	6.23306	6.03388	6.30606	6.64881	6.21615	6.4609	6.16199	6.52291	9.50716
FBgn0261113	7.65683	7.50422	8.01232	4.89447	5.88114	4.57357	7.91629	7.38855	7.65971	8.38245	7.56757	8.3478	7.4761	7.71043	7.95875	7.91517	7.44273	7.63149	3.66097
FBgn0284080	5.55608	5.93976	4.75386	5.94646	5.51431	5.21095	4.47962	5.03893	3.95305	3.07319	3.87763	3.55578	5.02204	4.75869	4.31628	4.13325	4.20844	3.9513	4.13949
FBgn0284081	0.317733	0.585423	0.404615	2.27684	3.71244	1.82563	0.332438	0.582921	0.357896	0.700724	1.03148	0.638373	0.487935	0.674031	0.494155	0.740954	0.696279	0.830916	0.584782
FBgn0038156	0.459473	0.639732	0.683659	0	0	0.238048	1.55835	1.34636	2.32886	0	0	0.0730742	2.09162	2.54706	2.64203	0.0631536	0.0742387	0	0.156917
FBgn0266186	5.54978	6.11416	5.5799	5.95091	5.60405	6.18229	5.51021	6.10823	5.40825	5.41834	5.54468	5.3301	5.86036	6.12616	5.84399	5.53275	5.55757	5.65681	5.04216
FBgn0266723	4.09713	3.89194	4.05283	3.37789	3.59344	3.98453	4.12063	4.2893	3.83409	4.10801	4.17735	3.84903	4.14604	4.03859	4.16942	4.01207	4.00016	3.73485	2.25976
FBgn0064116	6.24875	6.64026	6.19288	6.62661	6.24242	6.56376	6.01016	6.35671	6.13349	5.93268	6.24995	5.74118	5.69172	5.77237	5.68119	6.09546	5.8224	6.06903	6.07334
FBgn0266722	3.05918	3.31616	2.82277	3.73378	3.0876	3.47894	2.87927	2.8194	2.32764	2.18451	2.41785	1.87755	2.83683	2.7939	2.57742	2.07286	2.2456	1.92546	1.25954
FBgn0026181	5.50052	4.98726	5.72204	2.88279	3.41754	2.67787	6.20521	5.01244	5.79358	5.66226	5.03469	5.5768	5.69183	5.46251	5.89586	6.00047	5.84927	5.58227	6.34702
FBgn0026189	2.5917	2.57959	2.33545	3.38686	4.08051	3.1849	3.87261	3.57129	3.6367	5.66203	5.04997	5.47046	2.98326	3.03	2.84859	3.1298	2.89745	2.52079	4.17374
FBgn0264360	0.476074	0.61404	0.280349	3.8507	2.615	2.18076	0.281523	0.381145	0.263596	1.69268	0.629677	0.629895	0.58675	0.400101	0.286455	0.77887	0.475652	0.64553	0.81106
FBgn0040339	3.67141	3.8295	3.51679	3.64026	3.62899	3.87975	3.28876	3.61542	3.4018	3.20663	3.51928	3.07094	3.66495	3.54213	3.4795	3.27663	3.38732	3.23572	4.44977
FBgn0040228	4.3124	4.45254	4.21878	2.27269	2.79241	3.13648	4.0908	4.25857	3.7344	3.17463	3.48294	3.09132	3.85296	4.04891	3.69892	3.22605	3.55285	3.23026	3.08834
FBgn0040227	6.51604	7.13506	6.47568	8.37603	8.34954	8.28725	6.53069	6.91737	6.61136	8.03693	7.91097	7.94648	6.73062	6.85963	6.63499	7.75388	7.63232	7.92865	8.26802
FBgn0015024	5.81541	5.18755	5.63269	4.70919	4.51529	4.08893	7.25875	6.0332	6.27559	6.20548	4.90175	5.47259	5.84434	5.69401	5.73692	5.40937	4.47358	4.16993	3.63558
FBgn0015025	1.28476	1.39662	1.0958	0.795696	0.821442	0.650883	1.22679	1.36422	1.36718	0.989477	1.1632	1.01363	1.43202	1.34329	1.17756	0.934807	0.832695	0.685503	1.05205
FBgn0010051	3.9642	3.71576	4.43126	4.23308	5.1989	3.76156	5.5632	4.71353	5.59112	5.98713	5.53191	5.80678	4.69567	4.95557	5.00722	5.91349	5.62421	5.47941	4.04596
FBgn0010052	0.76809	2.23334	0.252401	0.539674	0.406795	0	0.439906	1.72506	0.192172	3.12929	4.61271	2.54591	0.318873	1.156	0.259301	3.70613	6.19424	1.94672	1.39327
FBgn0010053	4.94218	6.07451	4.75883	7.7049	7.72133	7.97144	4.34096	3.95348	4.50183	4.21084	4.39285	4.29777	5.06916	4.5371	5.22992	4.78954	3.7738	4.6643	4.33172
FBgn0026323	5.30544	5.1522	5.20706	3.11635	3.76839	3.39508	5.26601	4.79058	5.03477	4.59607	4.35411	4.54613	4.80215	4.77121	4.97881	4.53647	4.59133	4.5885	4.86538
FBgn0023130	1.95289	1.78925	2.18207	0.734784	1.62515	1.54214	2.2356	2.00099	2.40003	2.76281	2.65601	2.64477	2.01371	2.11166	2.07098	2.82818	2.9197	2.92159	3.45322
FBgn0026326	2.92621	2.95678	3.10779	0.954043	2.34835	1.5689	3.19435	3.18948	3.50719	3.24727	3.30829	3.24894	3.03523	3.16931	3.2314	3.2359	3.17803	3.05648	4.24916
FBgn0026324	5.3219	5.46123	4.73497	6.29747	5.71596	5.8889	4.81008	4.94696	4.36932	4.09203	4.41955	3.79274	4.80643	4.74017	4.41301	4.41873	4.7649	4.23743	5.1708
FBgn0000289	4.77631	4.04629	5.00009	2.32497	3.89163	3.22508	5.50014	4.84535	5.60442	5.99293	5.63142	5.84499	5.16198	4.89757	5.06192	5.72599	5.78434	5.81443	6.13159
FBgn0039212	3.40072	3.96203	3.37611	3.37566	4.38912	3.31441	3.24665	3.99539	3.36606	5.91743	5.96938	5.67067	3.67727	4.40154	3.86807	4.98074	5.56443	5.13361	5.18252
FBgn0030941	5.62974	4.60052	5.94198	1.02791	1.44032	1.5822	5.94584	5.30206	5.83582	3.23021	2.6803	2.88007	6.11486	5.61904	6.53349	3.24535	2.60334	3.16721	1.92193
FBgn0000283	3.52005	3.13071	3.81902	2.30619	2.94605	1.43971	4.82501	3.87918	4.58405	4.68128	3.95507	4.424	4.22947	4.06514	4.34577	4.40152	3.76886	3.4891	3.97262
FBgn0000286	4.6027	4.13521	4.68337	3.99128	4.1395	3.83665	5.18996	3.77229	4.80333	4.60471	3.92483	4.46673	4.26206	4.10302	4.25442	4.03841	3.72681	3.87352	3.73105
FBgn0038478	1.08145	0.885271	1.27987	0.389689	0.488373	0.296464	1.75701	1.58119	2.12306	1.93123	1.35501	1.6832	1.81184	1.23013	1.6628	1.50525	1.34105	1.21968	3.90854
FBgn0027588	7.08893	6.8363	7.28786	7.20258	7.37601	7.10575	7.2721	6.78753	7.3513	8.79146	8.86381	8.68488	7.34533	7.56714	7.5921	7.99522	8.48027	8.34334	7.93728
FBgn0027584	7.86695	7.25315	6.97082	5.92464	5.75066	5.69778	8.35337	6.80585	5.71717	4.92746	3.89206	4.36515	5.01472	3.83686	4.5437	5.36289	4.89551	5.95969	1.08462
FBgn0027585	6.29403	5.21158	6.62505	2.03111	1.96635	2.36005	6.42472	5.37223	6.31398	6.89215	6.17437	6.88666	5.81868	5.40863	5.86789	6.8856	6.70246	6.87764	3.42504
FBgn0027586	6.97904	6.90426	7.07959	3.70164	3.95793	4.50778	4.70497	4.59568	4.70844	4.1248	4.27511	4.02327	6.06721	6.74166	5.77012	6.10598	4.98164	6.02323	3.21958
FBgn0027587	3.21253	3.16509	3.53943	2.18875	3.05922	2.47094	3.88617	3.55389	4.05798	4.02806	3.57667	4.02513	3.53421	3.45488	3.63691	4.02957	3.98111	4.16097	4.27275
FBgn0027580	5.8902	6.15173	5.91222	8.54308	9.69746	9.5084	5.11192	6.08832	5.6429	6.59181	7.26669	7.0336	6.79002	7.56943	7.03765	6.76252	6.98526	7.17573	7.07954
FBgn0027581	4.04339	3.54728	3.53982	2.58131	2.67057	2.43078	3.18377	1.10282	3.62006	3.96757	2.16802	2.26058	3.30818	3.60094	1.72614	2.76511	3.11529	2.17079	2.72795
FBgn0027582	4.26672	4.25648	4.51455	2.85027	4.74267	2.94891	5.13871	4.83998	5.24106	6.49825	6.16354	6.08879	4.9204	5.39705	5.23391	5.85369	6.10816	5.79583	3.89249
FBgn0027583	3.32932	3.32651	3.26094	4.08063	3.82634	4.35941	3.10461	2.83824	3.21425	2.96853	3.22746	3.09841	2.87359	2.95851	2.93894	3.22726	2.98299	3.33527	4.15258
FBgn0037102	4.23157	4.09298	4.11641	3.61897	3.78859	3.76799	4.41686	4.44891	4.20856	3.69792	3.72819	3.72516	3.81224	3.82904	3.66054	3.70039	3.69913	3.49468	3.56639
FBgn0051472	6.48761	5.74064	6.43196	5.41402	4.9766	5.9594	4.74596	4.72169	4.6839	4.67521	4.99404	4.82279	4.86598	4.68002	4.90084	5.08403	5.11155	5.21663	4.8239
FBgn0037669	2.46674	2.86567	2.3783	2.28162	2.23762	2.38625	1.99306	2.64398	2.43132	2.28896	2.37149	1.98886	2.52495	2.56271	2.32186	2.25901	2.35125	1.99846	3.71553
FBgn0037660	3.26124	3.09239	3.43086	1.98208	2.39506	2.39917	3.23754	2.98306	3.2712	3.02475	2.8452	2.96803	3.23616	3.20624	3.2304	3.44124	3.48844	3.512	4.49167
FBgn0030817	5.99429	6.16659	5.94428	0.888778	0.712689	1.96983	6.26034	6.5495	6.5204	4.11653	4.43527	4.0634	3.50928	2.67834	2.70978	6.18359	6.32288	6.13446	8.15397
FBgn0030812	2.79227	2.60877	3.00024	1.12605	1.69644	1.30698	4.25473	3.0301	3.62393	4.17797	3.10794	3.80177	3.17096	3.30655	3.25866	3.61143	2.98568	2.90498	4.92335
FBgn0030813	2.77753	2.61885	2.77906	1.58468	1.51706	2.05542	2.31118	2.46465	2.72538	1.87646	1.83651	1.93037	2.65817	1.88489	1.78516	2.20594	2.15318	2.29743	4.56019
FBgn0037667	1.22977	0.763461	1.13671	0.366511	0.809435	0.402633	1.43752	1.44574	1.67356	1.20063	1.45696	1.37673	1.53373	1.47832	1.61359	1.21717	1.42806	1.23591	1.67484
FBgn0039210	2.06783	1.75523	2.16767	0.764643	1.44702	0.896537	2.54318	2.25648	2.36284	2.76106	2.43373	2.45911	2.43692	2.36374	2.44609	2.29688	2.29681	1.96223	3.22215
FBgn0082598	5.24076	5.06993	5.08277	4.82511	4.63934	4.02977	6.18215	5.50711	5.6838	5.66723	5.22275	5.37995	5.30627	5.15126	5.23758	5.43826	4.7559	4.43726	4.90324
FBgn0033320	7.07761	7.08263	6.82102	10.5824	9.89856	10.0061	5.7257	5.82634	5.46085	4.80321	5.06774	4.99268	6.89779	7.38774	7.23939	6.30127	6.27896	6.19467	4.8982
FBgn0000139	4.1222	3.60798	4.17068	4.97774	4.52505	5.0828	4.62268	3.93612	4.48074	4.13934	3.99783	3.9845	4.31157	3.96031	4.32072	4.19906	3.77165	3.76417	4.19692
FBgn0036641	3.10757	3.71977	2.91033	4.19823	4.10129	4.19284	2.54187	3.05454	2.76672	3.00194	3.10665	2.81089	3.24704	3.07212	2.77737	2.79356	2.9359	2.6275	6.41043
FBgn0036643	4.50789	4.05001	4.13968	6.00363	5.22674	5.22017	4.29437	3.84152	3.93245	3.89499	4.04681	3.81422	4.12651	3.77522	3.90478	4.26645	4.25767	4.09443	4.16403
FBgn0036646	1.77012	2.31513	1.72817	0.643742	1.63724	1.09209	2.1079	2.36444	2.58517	2.28184	2.64813	2.03235	2.20774	2.42102	2.15022	2.36411	2.16188	2.1235	5.57265
FBgn0036648	2.4231	2.90973	2.3359	2.83205	2.39961	1.95984	2.47237	2.74985	2.46115	2.49967	2.83987	2.41777	2.80207	2.96082	2.51968	2.29437	2.39945	1.99422	3.79694
FBgn0032943	2.25147	2.13622	2.01203	0.452023	1.02743	0.421911	1.74322	1.47354	1.33578	1.78559	1.85799	2.02163	1.87595	1.9176	1.86847	1.29129	1.24294	1.09901	2.93283
FBgn0032940	4.36506	4.09665	4.62123	4.59943	5.49775	4.87058	5.61632	5.54142	5.83976	5.64807	5.30618	5.75912	4.66271	5.00375	4.99795	5.34325	4.9069	5.15899	3.94109
FBgn0032763	1.61321	1.4734	1.82039	0.795696	1.30558	0.53194	1.91057	1.82538	2.10515	1.38443	1.5627	1.61054	2.03797	1.74027	1.81206	1.3949	1.34281	1.47629	2.79911
FBgn0032945	2.91785	3.14432	3.54103	6.53076	7.89827	8.19018	3.46399	4.70256	4.45742	5.48896	5.9926	6.20425	4.312	4.72646	5.0942	5.29037	5.0122	6.57099	3.55711
FBgn0004907	9.41976	9.08019	8.94333	7.02961	7.58326	6.73439	9.74071	9.47115	9.21122	8.65952	8.4195	8.64377	9.23389	9.20107	8.92942	8.45787	8.46856	7.96366	5.41105
FBgn0032949	9.12296	7.85762	9.03512	7.39729	8.04135	8.49511	9.49532	9.14925	9.08841	9.46366	8.94821	9.34258	9.29194	8.78803	9.36292	9.10365	8.58536	8.96396	6.2917
FBgn0004903	3.80485	3.46545	3.8869	2.95124	3.25557	3.47147	4.01215	3.83374	3.93941	3.98005	3.75241	4.01757	3.68254	3.7559	3.75232	4.31207	4.48012	4.52801	4.91412
FBgn0004901	3.51055	4.17009	3.48167	2.501	2.50051	2.40776	2.77797	3.31542	3.12201	3.29086	3.55229	3.14034	3.35103	3.53243	3.12706	3.76305	3.85477	3.73482	6.72266
FBgn0041579	5.6251	6.74015	4.49379	11.3919	12.1959	10.9321	5.72104	7.43177	4.73894	6.0672	7.83799	6.10787	6.07963	7.68309	5.8445	5.57317	7.01277	6.03529	4.94168
FBgn0020440	3.42785	3.01385	3.73045	0.943639	2.37448	1.0887	4.34657	3.5031	4.38081	4.15928	3.67903	4.17713	3.60291	3.65572	3.7866	4.31733	3.9469	4.09188	2.67993
FBgn0020443	6.21913	6.3704	6.19985	4.99104	6.20726	4.88204	6.96958	6.53468	6.87081	7.03499	6.67135	6.91464	5.77417	6.08668	5.93113	6.74748	6.77292	6.57851	5.29024
FBgn0020445	2.45382	2.66016	2.71336	0	0.637618	0.432216	3.91121	4.29502	3.80037	1.94672	1.41019	1.5081	3.57057	3.8701	3.76266	2.44098	2.8672	2.27783	3.91315
FBgn0013972	3.56314	4.77743	4.25582	3.34296	2.8186	3.28714	5.27776	6.22326	5.09484	1.0847	1.6439	0.965781	2.45363	3.69314	2.63908	0.535518	0.607311	0.819599	1.81616
FBgn0038418	0.99507	0.916197	1.27017	0.332536	0.651126	0.211043	1.79912	1.9031	1.79514	2.14201	2.02326	2.16712	1.16805	1.41314	1.58355	2.02019	1.75734	1.77609	2.09419
FBgn0004638	6.21866	6.11209	6.17759	5.31893	4.62483	4.2034	7.70309	7.1197	7.32123	6.14973	5.7115	6.36755	6.5287	6.23905	6.37367	6.51249	6.12687	6.09741	4.18094
FBgn0053116	2.54058	2.11434	2.31719	0.728738	1.46032	1.48052	1.38942	1.70981	2.15208	1.84542	2.18019	2.29755	1.61942	2.09941	1.5427	2.45409	1.89524	2.36469	5.04238
FBgn0263116	0.343288	0.305953	0.348747	3.54912	3.45896	3.29785	0.489777	1.14692	0.580897	1.12846	1.41404	1.40427	0.954784	1.04481	0.930746	0.742326	0.643322	0.832435	0.24795
FBgn0053111	4.11399	3.96466	3.99121	1.31368	2.08344	1.41861	4.53309	4.2616	4.24647	4.15413	3.87573	4.0179	4.07259	4.09154	3.98537	3.97605	3.80633	3.59741	2.10074
FBgn0053113	8.29052	8.35782	8.25611	6.56636	7.88902	6.41684	8.53187	8.5464	8.11251	8.30158	8.24905	8.20489	7.72752	8.11178	7.69768	8.16397	8.29178	8.14362	5.95449
FBgn0011828	7.95244	7.39259	8.11216	1.27557	1.25304	1.40597	9.10714	8.6837	8.84597	4.05162	4.04681	4.14109	8.07539	8.31902	8.56248	3.01846	2.32513	2.81689	3.21836
FBgn0021875	3.59536	4.2799	3.4382	4.11688	4.2811	4.02569	3.19704	3.66941	3.27627	3.18671	3.43474	3.12396	3.40602	3.73033	3.33496	3.5223	3.56317	3.49668	4.57798
FBgn0032341	4.02496	3.66983	4.15177	3.43302	3.78142	3.49718	4.42668	3.81387	4.3129	4.78776	4.4549	4.80803	4.07601	4.10148	4.26451	4.52749	4.6121	4.65131	5.24918
FBgn0011822	3.84064	2.46077	4.27632	0.382005	0.361989	0.439698	2.07822	1.68471	2.71415	0.865409	0.886368	1.47264	9.61535	8.14937	10.0356	2.78576	0.139794	0.367203	0.96997
FBgn0032614	4.67411	4.35668	5.00978	6.9547	6.21215	6.64767	3.27227	3.2965	3.27839	4.45291	5.06306	4.76727	5.05232	5.12492	5.15132	7.01711	6.0761	7.44864	3.34766
FBgn0011824	2.84369	4.08806	2.77505	4.15391	4.40352	4.27039	3.33726	4.21557	3.49187	3.09471	3.51231	3.40648	2.89239	3.66068	2.95225	3.85014	3.11667	3.77712	4.58021
FBgn0033548	3.70913	5.59598	3.40827	5.50721	5.52786	5.75334	3.68301	5.372	3.4929	3.82746	4.40321	3.6686	4.08769	4.86155	3.58255	4.08323	4.32069	3.79644	3.14953
FBgn0033544	3.38103	3.14756	3.38023	3.35888	4.03679	3.0125	4.61709	4.34244	4.14191	3.77985	3.05407	3.74202	4.17214	3.53274	3.90833	3.27012	3.12531	3.18612	3.2055
FBgn0033547	2.44119	2.96047	2.22294	2.64459	2.93029	3.03897	2.20384	2.46284	2.06767	1.94933	2.18212	1.8044	2.18768	2.37573	1.96432	2.05388	2.18975	1.9348	3.16045
FBgn0033540	2.48343	3.53012	2.70305	2.81798	3.51582	3.25508	2.85412	3.46912	3.06642	3.19584	3.3078	3.23709	2.86616	3.41036	2.90376	3.79629	3.61885	3.64037	2.27476
FBgn0033543	3.94419	3.98183	4.30757	8.92648	8.50735	9.4103	4.43183	4.75481	4.83458	4.80192	5.22497	5.75189	4.5924	4.63849	5.29814	4.40991	4.41755	5.25834	4.33604
FBgn0085317	0.31757	0.82192	0.747636	0.734784	0.489058	0.992706	0.919602	1.34884	0.9822	1.57485	2.00522	1.94105	1.53365	1.60992	1.78695	5.44537	5.27365	5.65583	0.339698
FBgn0284256	4.66249	4.81976	5.17175	3.04325	4.67865	4.29989	5.15587	4.93878	5.564	4.14076	4.28558	4.48923	4.34112	4.86501	4.61484	4.34173	4.25296	4.38473	5.2531
FBgn0032311	1.55334	3.34153	1.08332	0.239396	1.00133	0.301734	4.51283	6.55311	3.78757	0.281547	2.00295	0.107268	0.798575	2.02495	0.759481	1.1842	4.25311	0.617515	2.25433
FBgn0086698	2.36518	2.38378	2.61192	0.624331	1.90365	1.63056	2.5732	2.1705	2.79898	3.28981	3.23948	3.1301	2.53373	2.69523	2.41665	3.30011	3.30285	3.31187	4.42798
FBgn0086694	2.66666	2.59193	3.02128	0.991449	2.59242	1.7551	3.40854	3.05426	3.56196	3.69895	3.48839	3.52666	3.18463	3.1937	3.05025	3.48233	3.58307	3.37008	4.65142
FBgn0086691	4.89819	5.51303	4.86231	10.8276	10.5166	10.7558	4.36623	5.46004	4.80014	5.02798	5.86811	5.77981	5.67873	5.82179	5.81919	4.67877	4.93692	5.29917	6.37335
FBgn0086690	3.42622	2.38727	3.77739	2.45974	2.30515	1.36155	4.04532	2.62226	3.64088	3.22668	2.47511	2.99068	3.93758	3.67598	4.1565	2.63584	1.81952	1.89233	2.23272
FBgn0035235	3.71275	3.63807	3.66217	2.92727	2.39322	2.59415	3.77754	3.73663	3.48364	4.03708	3.81071	3.79345	3.7637	3.6805	3.61035	3.75307	3.78302	3.56996	1.79374
FBgn0035237	5.19219	4.50834	5.65825	1.7635	2.37503	2.12192	6.41914	4.65535	5.96933	5.158	4.51276	5.124	5.8291	5.62491	6.15539	4.5155	4.18192	3.98802	4.69957
FBgn0035231	0.915502	1.07873	1.05642	1.64991	1.53339	1.94119	0.89823	0.913457	0.985729	1.75589	1.86995	1.87355	1.45793	1.70046	1.83167	1.51158	1.30007	1.7638	1.17416
FBgn0036254	1.07123	1.54266	0.820265	1.07305	0.880978	0.380952	1.85578	1.87933	1.82746	1.74423	1.32276	1.38475	1.02922	1.66206	1.13648	1.59148	0.678558	0.511908	0.75042
FBgn0035233	2.92313	3.1713	2.80835	3.77759	3.49301	3.84855	2.44915	2.69297	2.69001	2.83972	3.07198	2.81361	2.80736	2.8436	2.74451	3.04977	3.03539	2.93336	3.88857
FBgn0035232	5.98216	5.19103	6.39654	4.20947	5.4244	4.28511	6.47264	5.97633	6.5743	6.39647	6.11782	6.36208	6.09429	5.8061	6.36376	6.39581	6.30534	6.16001	3.99461
FBgn0036255	3.45844	3.83515	3.30549	3.15539	3.04535	3.53071	3.19931	3.79692	2.96506	3.18771	3.37258	2.86495	3.69207	3.61825	3.39603	3.22309	3.41967	3.06539	3.00919
FBgn0035238	2.38679	2.0637	2.46132	2.70579	3.27561	3.55267	2.44886	2.50891	2.54729	2.8519	2.82432	3.08332	3.09354	2.91242	3.16704	2.78492	2.75458	3.06502	3.14668
FBgn0033742	0.269424	0.3015	0.425968	3.09572	3.10809	3.24239	0.238949	0.495906	0.313142	0.721659	1.25344	1.28406	0.583512	0.486275	0.619774	0.576893	0.628902	0.785761	0.391507
FBgn0038428	4.32399	4.80334	3.90307	5.95508	5.45213	5.27109	4.16633	4.64362	3.80713	3.95068	3.96202	3.72062	4.24427	4.35908	3.88984	4.13031	4.43739	3.94615	4.63775
FBgn0037307	0.526626	1.04992	0.804232	1.31772	1.34312	1.40453	1.93965	2.92899	3.13816	0.115708	0.21764	0.375895	0.304226	0.529172	0.525959	0.307137	0.291568	0.406607	0.129091
FBgn0014006	5.30385	5.09027	5.38292	3.25701	3.83838	3.70961	4.95159	4.64038	5.05218	4.70216	4.45501	4.5525	5.53373	5.18936	5.21061	4.67379	4.55905	4.62849	5.70545
FBgn0250819	5.47242	4.60155	5.04888	0.702376	0.861049	0.852637	5.83482	3.70888	4.41977	2.82528	2.01561	1.98465	4.75192	4.07026	4.3016	3.26572	1.7763	2.52012	0.615544
FBgn0014189	5.19915	5.58114	5.31441	5.61542	5.50601	5.36038	5.05108	5.32968	5.31375	5.46925	5.45198	5.48161	5.30238	5.39015	5.34268	5.74293	5.7337	5.91523	6.83605
FBgn0038975	0.756448	0.891787	0.922808	0	0.203606	0.0602875	2.90266	1.4757	1.67577	0.0436312	0.211582	0.0405169	1.20177	1.47825	1.1461	0.115192	0.0689698	0.0843143	1.30601
FBgn0038974	2.95364	2.9473	3.01271	3.33749	3.25357	3.56175	3.03026	2.98053	2.8452	3.10126	3.17318	3.19747	3.05205	3.14107	3.18316	2.96002	3.19594	3.34626	2.50088
FBgn0038977	4.82815	4.96307	4.00298	1.04412	0.287714	0.165347	3.65319	4.01619	3.03683	1.12868	1.43007	0.808501	4.35681	4.29322	3.2935	1.27451	1.45737	0.800616	0.157604
FBgn0052641	5.79053	5.22561	5.56662	4.74842	4.97568	5.81259	5.78902	5.57179	5.21522	5.49469	5.38001	5.36097	5.50306	5.23756	5.50531	5.17669	5.29071	5.26411	2.75149
FBgn0052640	5.50417	4.93836	5.28872	4.51253	4.73211	5.53732	5.49028	5.29303	4.9139	5.20959	5.09647	5.05837	5.20699	4.94299	5.23114	4.89453	5.01376	4.99951	2.49635
FBgn0052647	2.77882	2.58278	2.49697	6.70171	5.49921	5.52403	3.32215	2.67917	2.63754	3.81769	3.2053	3.77885	4.1003	3.22816	3.53637	3.18938	2.09951	2.57574	0.827784
FBgn0033749	1.76113	1.82574	1.97197	0.658519	1.69376	1.28682	2.14894	2.32069	2.39762	2.45761	2.36618	2.27756	2.14668	2.26531	2.39962	2.26187	2.50801	2.50928	2.26723
FBgn0002774	3.68812	3.56914	3.87288	3.17143	3.85545	3.75578	4.10283	3.68323	4.12901	4.77374	4.64247	4.61296	3.96754	3.86618	4.08287	4.88258	4.54706	4.74836	3.80204
FBgn0002775	2.73546	2.68559	2.86418	1.38701	2.09808	1.91578	2.87227	2.58952	2.97038	3.1227	3.17042	2.97714	2.79697	2.47648	2.57907	3.37025	3.42802	3.25357	5.23725
FBgn0052649	6.16993	6.83593	5.98035	6.23254	6.05368	6.18075	4.61422	4.87159	4.82921	3.77799	4.27737	3.71138	4.45715	5.01336	4.5056	4.02285	4.29502	4.05382	5.56008
FBgn0014184	11.2316	10.7605	10.9637	10.5545	10.0423	10.9603	11.1032	11.0583	10.9188	9.8053	8.70373	9.78353	10.623	10.3294	10.2515	9.61461	10.0353	10.2326	9.34537
FBgn0265457	0.323248	0.0464076	0.235629	0	0	0	0.151836	0	0.238556	0.19559	0.0712601	0.100744	0.25146	0.310022	0.361302	2.69308	1.85084	3.14747	0.249992
FBgn0042178	2.86879	3.45173	3.15676	2.35459	3.80583	3.28803	3.4205	3.58426	3.71763	4.32455	4.35278	4.48885	3.63235	3.51566	3.43122	4.13105	3.87957	4.10763	5.32722
FBgn0037653	4.65551	4.82145	4.78472	5.31318	4.90629	5.32982	4.08348	4.25315	4.35343	4.25015	4.44539	4.22335	4.29861	4.24758	4.36871	4.70772	4.55689	4.72371	6.04483
FBgn0042175	4.46199	3.84937	4.50049	6.37798	5.58079	6.36554	4.96106	4.24368	4.70941	4.5212	4.32785	4.46027	4.68977	4.32041	4.57865	4.71703	4.34824	4.51807	4.57013
FBgn0042177	3.00914	3.64234	3.35832	2.61109	4.26496	3.48391	3.63036	3.73458	3.97718	4.65426	4.61288	4.85326	3.95486	3.78664	3.68812	4.3755	4.10886	4.4083	5.6201
FBgn0262484	9.35257	9.63912	9.84616	10.1997	9.21341	11.0486	10.5342	11.4413	10.5268	11.6664	11.7716	11.6464	11.5852	11.443	11.5477	16.7449	16.7067	16.723	0.908238
FBgn0034425	2.37293	2.32175	2.42983	1.62755	2.12669	2.00454	2.20239	2.28436	2.3656	2.67873	2.8321	2.5606	2.57116	2.29149	2.38952	2.81518	2.92076	2.79429	4.05009
FBgn0042173	3.41688	3.38955	3.03695	3.1443	1.94408	2.92277	3.06025	3.1558	3.23909	3.25652	2.84976	2.67214	3.21476	3.00291	3.19711	3.16909	3.02425	3.37389	4.52461
FBgn0031904	3.60872	3.12605	3.52769	2.74113	3.1328	2.60669	3.97939	3.80308	3.83291	4.01146	3.94124	3.95644	3.96213	3.87727	4.15383	3.74606	3.77429	3.53299	3.29481
FBgn0038454	1.66234	1.785	1.8134	0.740806	1.40419	0.46026	2.0473	2.07786	1.96257	1.94208	1.87693	1.77738	1.80752	2.01613	2.05334	1.63776	1.49892	1.29074	1.75233
FBgn0031902	2.66475	2.74314	2.78719	0	0	0	1.3063	1.18498	1.30091	1.67253	1.41667	1.38129	1.3401	2.38682	1.52825	0.839304	0.672718	0.862701	1.23698
FBgn0260392	3.51356	3.59498	3.34017	4.52697	3.40257	4.21822	2.83775	3.22545	2.55829	3.17527	3.24554	2.83417	3.05548	2.40327	2.82155	2.43827	3.09793	3.28998	3.44324
FBgn0260390	0.739793	0.816337	1.04184	0	1.46518	0	1.79069	1.28908	1.56369	2.6046	1.37639	1.38291	1.50459	1.54888	1.49724	1.79035	1.63442	0.96693	1.59119
FBgn0260397	1.479	1.60157	1.62639	0.256309	1.18843	0.635786	2.06544	2.1324	2.32413	2.31721	1.98201	2.13104	2.0134	2.02655	1.76416	2.33877	2.44591	2.17293	3.6906
FBgn0260398	2.28392	2.60119	2.28184	1.84663	2.70114	1.31253	2.8945	3.26343	3.29652	3.1602	3.61214	3.63032	2.66972	2.94055	2.58677	3.0445	3.09424	2.69539	3.16103
FBgn0034420	7.8154	7.75837	7.95872	3.50978	5.3268	4.01397	7.22808	7.06298	7.04934	5.79922	5.83224	5.84497	6.88406	7.46144	6.77974	5.095	5.37036	4.91883	5.42486
FBgn0262732	6.24617	6.81467	5.83477	6.4562	6.93942	6.9157	6.00936	6.4707	5.68667	6.20348	6.21867	6.01356	5.97978	6.20571	5.69765	6.27361	6.69751	6.46953	6.41828
FBgn0262730	1.53333	1.26248	1.10154	0.812946	0.422634	0	2.7232	1.04851	1.74102	1.64557	0.94111	1.24396	1.39993	1.31693	0.844179	1.40299	1.14446	0.988595	4.14664
FBgn0262731	5.66396	5.91837	4.82163	5.77337	4.91735	5.08178	4.87906	5.21264	4.35664	3.9496	4.31844	4.26486	5.26214	4.98834	4.61035	4.50477	4.34718	4.21074	4.78905
FBgn0262736	11.2612	10.2643	11.1595	7.73826	7.49046	7.46128	11.8777	11.1932	11.364	9.4715	9.30457	9.29597	9.97791	9.86147	10.2975	9.2708	8.71441	8.83615	7.3739
FBgn0262737	5.10511	4.38251	5.09381	2.68769	2.21838	2.13434	5.50884	4.44737	4.97356	5.36987	4.22004	4.90118	5.26917	4.84624	5.26952	5.1514	3.97648	4.17059	4.33921
FBgn0029067	3.38778	2.80152	3.40537	2.34413	2.93781	2.48458	4.01288	3.1879	3.86727	3.80382	3.04287	3.51058	3.48227	3.25983	3.60027	3.349	2.9762	2.88794	3.37977
FBgn0037892	4.73204	4.96041	4.46935	6.04072	5.91613	5.94885	4.14849	4.38547	4.04939	3.27918	3.82522	3.34243	3.98414	4.11925	3.8901	3.64814	3.79972	3.67182	4.85495
FBgn0262738	2.87523	2.87377	2.62223	0.734784	0.418328	0.594736	6.95772	4.3538	5.90676	2.63924	1.8589	2.09371	3.28456	3.63211	2.84814	4.24393	3.94118	3.13079	2.84541
FBgn0262739	4.24309	3.97462	4.02003	3.40273	2.98244	2.37503	5.84314	3.71275	4.074	4.26844	3.31219	3.83632	3.8252	3.57753	3.47528	4.12319	3.34291	3.13244	2.60894
FBgn0037897	3.08915	3.2275	3.39253	3.04203	3.43805	2.88769	3.74287	3.25357	3.8454	4.40911	4.25776	4.28397	3.75336	4.02693	4.00354	3.99064	4.09467	3.87982	4.17936
FBgn0037894	3.20725	4.072	3.39716	3.47177	4.26706	3.96251	3.44098	4.05937	3.92767	4.30068	4.50783	4.50333	3.56638	4.08197	3.52769	4.53027	4.37023	4.44575	5.77369
FBgn0026666	4.1216	4.46581	4.12526	4.27452	4.00009	4.1425	3.43417	3.6504	3.32529	2.75017	3.11642	2.58031	3.33053	3.63679	3.48123	2.70936	2.92161	2.77983	3.57541
FBgn0000455	5.62208	5.64256	5.38897	7.31565	6.54909	6.9101	5.28192	5.30866	5.13331	5.25345	5.51128	5.29211	5.46388	5.383	5.42942	6.09199	5.90844	6.42039	5.75224
FBgn0000454	6.25668	6.74754	6.33743	7.03888	6.53494	6.6385	6.4409	6.90895	6.59678	5.31943	5.66233	5.5797	7.91695	7.78086	8.1567	6.11323	5.64471	6.22565	7.9704
FBgn0264089	2.67867	1.94039	3.58752	0	0.313422	0.123582	3.5162	2.3005	3.5027	1.42428	0.884574	1.52281	6.98029	6.76917	7.56652	2.86146	2.21255	2.72933	1.47749
FBgn0260642	2.19737	1.16215	2.12261	0.525792	0.526824	0.82479	1.17058	0.246118	0.809785	1.46425	0.98578	1.00355	1.15889	0.853812	1.31737	0.620753	0.305939	0.336834	0.12798
FBgn0264087	0.751334	0.84588	1.18219	0.230865	0	0.524807	1.79195	2.0827	1.89873	3.57684	3.52046	3.61442	2.28414	2.38239	2.44846	6.76553	6.37877	6.91031	1.79711
FBgn0264085	0.419744	0.277431	0.267202	0	0	0.519911	1.00042	1.23277	1.00453	1.48454	1.64577	1.54447	1.55544	1.08962	1.20769	6.09229	5.4039	5.87066	0
FBgn0039141	2.59233	2.63296	2.71481	1.84942	2.66801	2.24579	3.10181	2.88332	3.13685	3.37554	2.97685	3.37918	2.93477	2.97539	2.78771	3.15577	3.28966	3.35274	4.45713
FBgn0039140	5.24375	4.93665	5.41897	5.12415	5.3128	5.64103	4.97252	4.64422	5.16078	4.97288	4.83525	4.92584	4.74495	4.58506	4.77531	5.17989	5.01936	5.28711	5.47273
FBgn0039145	3.67576	3.28016	3.5819	4.44609	4.38601	5.11193	3.43975	3.45697	3.19962	2.33838	2.49888	2.25123	3.3027	2.95457	2.67222	2.44407	2.50426	2.49494	3.46932
FBgn0030178	2.79375	2.78683	2.76779	3.57056	3.99702	4.62855	2.22507	2.29126	2.22589	2.11307	2.09261	2.046	2.4077	2.27491	2.11524	1.96127	2.16331	2.19671	3.28389
FBgn0039149	2.23809	2.06231	2.18196	1.74265	2.31386	2.16343	2.20411	2.49202	2.1169	2.91361	2.65281	2.46675	2.37739	2.19246	2.08604	2.79977	2.78723	2.63408	1.11079
FBgn0034138	10.6369	10.707	10.3204	13.2326	12.9667	12.8897	10.1772	10.2071	9.70384	10.8809	11.241	10.9306	10.051	9.8708	9.90278	10.9102	10.8138	11.1024	9.96268
FBgn0031449	4.17753	4.09795	4.46087	4.18907	5.56863	5.72477	4.03429	4.69656	4.05893	3.12877	3.42133	3.57183	4.71969	4.7057	4.99964	3.04468	2.7851	3.17872	5.69386
FBgn0030316	3.38612	3.23826	3.39443	3.19279	3.16428	3.06327	3.34441	3.12338	3.41584	2.96846	3.13355	2.9929	2.98482	2.93993	3.30053	3.26964	3.16484	3.10835	3.93177
FBgn0030311	4.95778	4.61315	4.75563	4.30039	4.21089	4.53048	4.65121	4.57389	4.43064	4.18017	4.23919	4.0107	4.3541	4.21883	4.32409	4.27634	4.38066	4.18664	3.71373
FBgn0037470	4.51373	4.43247	4.65995	3.08118	4.40668	3.90398	4.8755	4.68826	5.00305	5.19587	5.32141	5.1057	4.59038	4.80057	4.73796	5.34059	5.39412	5.20856	5.35963
FBgn0037473	4.32976	4.1403	4.10134	4.58318	4.68453	5.12774	4.28017	4.15238	3.90019	3.80212	3.95558	3.85043	3.90575	3.66811	3.47067	4.06959	4.17222	4.26274	4.55065
FBgn0038363	5.25897	5.21501	4.74072	5.7803	5.33116	5.24973	4.83774	5.01566	4.31827	4.51369	4.50692	4.18335	5.01336	4.64296	4.69643	4.74051	4.7685	4.51224	3.39227
FBgn0000635	4.14513	3.02511	4.36148	0.256309	0.295559	0.258895	4.59189	3.15878	4.2785	4.64937	3.61388	4.37519	3.71335	3.75313	4.34794	4.13803	3.23523	3.42611	1.065
FBgn0037478	3.69988	4.06395	3.26292	4.73406	4.28317	4.65065	3.19999	3.57022	3.12515	3.41223	3.70161	3.26406	3.27271	3.58646	3.20654	3.4458	3.50151	3.42262	3.99522
FBgn0000636	4.66108	5.37145	4.71251	0.562367	1.45089	0.933649	5.67872	5.61522	5.14272	5.63053	4.94563	5.46112	5.18519	5.65986	5.13343	4.78492	4.7367	4.45752	1.92045
FBgn0044020	4.07802	3.88719	3.65887	5.20472	4.36071	4.85916	3.39526	3.22558	2.77628	3.50739	3.64246	3.44352	3.87536	3.38502	3.58533	3.97741	3.60388	3.66676	3.22097
FBgn0039319	3.36937	4.06962	3.22283	0.429832	0.706828	0.992059	1.22607	1.74888	1.03792	3.19342	3.11759	2.95822	1.19384	1.91398	1.44577	3.26296	3.57563	3.37791	0.303717
FBgn0011591	1.98856	2.01308	2.2872	0	0.492464	0.450829	2.93458	3.14573	3.18797	3.92205	4.20219	3.14816	3.28558	3.09028	3.37951	1.5206	1.07525	1.26889	1.39614
FBgn0011224	3.74949	3.73416	3.6622	0.831748	0.556473	0.215805	4.30937	3.22017	3.89033	3.86392	2.84365	2.98651	3.26775	3.25376	3.03817	3.50528	2.63743	3.17809	3.57245
FBgn0011225	5.56749	5.44259	6.11191	5.66469	6.3037	6.99686	6.38278	5.78676	6.5031	6.97915	6.94844	7.22222	5.92602	6.23094	6.14568	7.38885	7.18485	7.79925	6.33638
FBgn0283500	5.5041	5.71871	5.57027	6.41794	6.44436	6.12333	5.63891	5.37894	5.71046	6.39977	6.42141	6.1488	5.45582	5.82539	5.51956	6.3033	6.51202	6.21691	6.64249
FBgn0039494	4.9643	4.56036	4.3246	6.6891	6.27445	6.4326	2.83073	2.90331	2.71475	2.52662	3.06486	2.506	2.6446	2.8589	2.76739	2.50453	2.74465	2.62681	2.579
FBgn0283503	2.38107	2.43453	2.56674	1.65311	2.2576	1.80627	2.7227	2.26464	2.88298	3.28571	3.26729	3.32678	2.76574	2.81534	2.80223	3.42596	3.51099	3.30333	3.70471
FBgn0015240	3.41102	3.54332	3.51393	3.13995	3.53795	3.58417	3.44231	3.17909	3.58409	4.3801	4.05545	4.01488	3.36316	3.456	3.4729	4.26123	4.2758	4.36129	5.75886
FBgn0266490	2.69028	2.64047	2.44632	3.44378	3.3367	3.44346	3.01038	2.97138	2.53574	2.66083	2.80984	2.45409	2.80531	2.31683	2.11184	2.50601	2.67603	2.94608	1.8349
FBgn0283509	6.42778	6.03288	6.35119	5.84446	6.38345	6.3366	6.4834	6.14254	6.47914	7.79749	7.50961	7.5784	6.82435	6.51858	7.08053	6.89789	6.63223	7.27105	4.06441
FBgn0015905	2.28336	3.0403	2.35016	2.16292	2.71842	2.33812	2.35139	2.79932	2.57197	2.62968	2.75021	2.67715	2.37293	2.86771	2.36034	3.12618	3.02099	3.06726	3.86491
FBgn0015903	2.51429	2.00634	2.55135	0.175828	0.290855	0.193874	3.81284	3.3632	3.59708	4.03885	3.38548	3.88232	2.3741	2.23654	2.25599	3.50159	3.19579	3.12567	3.96135
FBgn0019643	6.91904	4.88005	7.07754	3.55906	2.39487	2.76061	6.18494	4.67525	6.20491	5.35344	4.74355	4.96998	3.7428	2.84145	4.33262	5.94694	4.98442	5.701	4.27837
FBgn0037780	4.46768	4.24927	4.48826	5.45648	4.95803	5.16493	4.38482	3.83187	4.34445	3.90018	3.89516	3.73425	4.11524	3.88264	4.04123	4.07619	4.14688	4.13517	5.38223
FBgn0262866	2.60491	2.8323	2.65576	1.27557	1.69021	1.65721	2.96358	2.79547	2.97542	3.30414	2.99481	3.0834	2.71764	2.90929	2.69521	3.12809	3.11361	3.41611	4.44105
FBgn0032935	4.21664	3.40296	4.30288	2.73011	2.88374	3.27021	4.54574	3.70066	4.27952	3.26467	2.95033	3.20905	3.70211	3.25915	3.81442	3.46285	3.05196	3.18125	2.14188
FBgn0261119	3.43052	4.0333	3.6527	2.96585	3.67469	3.94256	3.68851	4.0591	4.09571	3.84938	4.14135	4.02797	3.75668	4.05322	3.94767	4.29951	4.26321	4.42171	5.49427
FBgn0032934	0.57275	0.539783	0.815637	1.17855	1.2118	1.30464	1.01951	0.784326	1.50697	1.33065	1.04668	1.07559	1.49658	0.662666	0.748008	2.75563	2.3038	2.80911	4.12633
FBgn0019644	9.30152	9.28046	9.12885	10.666	10.1092	10.648	8.71575	8.75903	8.42189	7.06053	7.40867	7.07397	8.01801	7.83952	7.973	7.35726	7.41084	7.4051	7.97422
FBgn0261112	3.38588	3.58112	3.30914	3.50011	3.50336	3.64157	3.13315	3.40493	3.27562	3.26693	3.5391	3.39554	3.06317	3.10656	2.90901	3.55689	3.45304	3.48722	5.61282
FBgn0261111	2.40409	2.29334	2.3409	2.97865	2.3978	2.27088	2.10316	1.97508	1.94251	2.38385	2.29879	2.26752	2.14228	2.17416	2.03917	2.36538	2.47216	2.38444	2.05463
FBgn0036956	2.37454	0.951407	1.06608	1.04412	0.124871	0.50713	2.12654	0.972992	1.06044	4.0471	3.08047	2.75405	1.81594	1.07897	1.21986	6.51952	4.44404	4.87725	0.602434
FBgn0266724	5.09566	5.31984	4.77224	5.0407	4.35963	4.64427	4.54183	4.82064	4.05467	5.0073	4.90751	4.4731	4.94463	4.89672	4.46692	4.26483	4.55358	4.05462	2.39178
FBgn0034786	2.99052	2.60029	3.39745	2.36633	3.58451	2.9294	3.62958	3.01088	3.75591	3.97622	3.59798	3.93208	3.46149	3.55863	3.61758	3.87234	3.81792	3.73134	3.19581
FBgn0034784	0.802049	0.613825	0.940505	0	0.176699	0.171604	0.578709	2.66177	0.796122	0.235793	1.01296	0.531844	0.196175	0.535664	0.410701	3.83683	4.31924	4.02743	0.238234
FBgn0034785	7.80617	6.69058	7.98873	0.848575	0.512782	0.795636	2.09888	1.79847	3.74744	2.44087	1.55304	2.42229	3.47276	2.45323	4.05183	1.98842	1.32205	2.10204	0.102265
FBgn0051286	0.630263	0.782988	0.497077	4.65477	4.14223	4.64902	0	0.512829	0.203189	0.530935	0.404442	1.15667	0.564501	0.442036	0.617428	0.618316	0.753286	0.718077	1.84582
FBgn0051288	5.15915	5.15641	4.6487	5.8693	5.31297	5.36408	2.8258	2.92458	2.53805	4.62075	4.68218	4.42203	3.36348	2.94772	3.14925	4.81669	4.77442	4.80917	2.17057
FBgn0033378	4.47586	4.89813	4.41184	4.11221	4.1818	4.9074	4.53041	4.98704	4.34535	4.20507	4.3905	4.05915	4.55353	4.80558	4.44321	4.50092	4.57232	4.46473	4.46569
FBgn0033379	3.19535	4.04661	3.20712	2.67055	3.78754	2.45637	3.57853	4.13296	3.68155	4.14898	4.03451	4.13417	3.64935	4.06738	3.69308	4.07961	3.89776	3.80145	4.00468
FBgn0085319	0.37034	0.125482	0	0.872417	0.175862	0.135557	0.823679	0.903127	0.276529	7.2805	6.81428	6.60251	0.408736	0.639594	0.442054	0.677898	0.385813	0.31556	0
FBgn0033373	3.1243	3.14577	3.35898	6.32349	6.18208	6.9329	3.46671	3.86691	3.73456	3.77197	4.07747	4.05775	3.54778	3.74757	3.79722	4.23821	3.98879	4.35512	4.14682
FBgn0036257	5.10509	4.09566	5.23525	4.67297	5.27334	4.5523	5.85857	5.24188	5.70264	5.71607	5.15092	5.55069	5.329	4.94111	5.30157	5.85585	5.45443	5.58522	4.31635
FBgn0032938	3.36883	3.3019	3.54057	2.79121	2.93368	2.39227	4.2452	3.33612	4.06954	4.27456	3.61804	4.1404	3.63062	3.71763	4.06558	4.00535	3.8472	4.02471	3.69263
FBgn0034876	4.78269	5.24444	4.61784	5.17942	5.1469	5.3318	4.48706	4.89261	4.55953	5.45788	5.61079	5.33966	4.63465	4.94449	4.6882	5.38846	5.60409	5.53443	7.04092
FBgn0034877	8.55321	8.44223	8.41409	9.57826	9.1175	9.4105	7.9525	7.72388	7.85649	6.27653	6.64918	6.52915	7.49426	7.38069	7.54638	6.63789	6.64148	6.7629	6.91845
FBgn0259923	2.18641	2.16367	2.10746	1.52095	1.36079	2.25332	2.02212	1.54013	1.58292	2.09338	1.8629	2.29383	2.57422	1.98322	2.63897	1.364	1.24037	1.90726	3.44502
FBgn0034878	3.60833	3.31055	3.94064	1.99976	2.67748	2.77718	4.01878	3.63643	4.27063	4.19131	4.15357	4.10092	3.73136	3.48822	3.77785	4.36496	4.40718	4.44656	5.19309
FBgn0034879	3.88593	4.96657	3.34753	6.13107	6.5603	5.9559	3.05765	4.00679	3.04617	3.32524	3.86374	3.32238	3.32127	3.68117	3.02574	4.23277	4.00254	4.02423	5.51862
FBgn0038365	0	0.0422561	0.0987256	0	0	0.0760569	0.0542809	0	0.103877	1.16243	1.02627	1.6118	0.279178	0.0825439	0.0636448	2.20638	1.65095	3.32813	0
FBgn0038366	4.15383	3.54776	3.9378	0	0	0	0.266408	0	0.82405	0.361495	0.0696344	0.206221	0.506578	0.296968	0.625774	0.780291	0.610274	0.76748	0.498472
FBgn0038360	3.97918	4.13076	3.77168	5.1245	5.40258	4.90052	3.87046	3.84666	3.68575	5.06936	5.14484	4.79188	3.74784	4.11876	3.69863	4.75004	4.95058	4.90099	4.62753
FBgn0033690	3.40069	3.85943	3.0455	3.72882	3.71068	3.76731	2.73147	3.22632	2.78198	2.24909	2.59954	2.14594	2.59594	2.94769	2.38823	2.45455	2.69763	2.36385	4.4351
FBgn0037788	3.06772	3.24408	3.82053	7.327	7.39016	8.26636	3.66879	4.71943	4.61748	4.89982	5.13242	5.95286	4.97122	4.91173	5.44413	4.072	3.90725	5.14005	4.08929
FBgn0002945	3.13981	2.26254	3.25814	0.300282	0.0946517	0.395872	3.79426	1.8748	3.23793	2.48628	1.28539	2.00637	3.16797	2.82543	3.26106	2.92763	2.2381	1.9212	0.0327785
FBgn0030177	3.51416	4.63334	3.57645	4.15486	4.73239	4.99347	3.40341	4.31062	3.58467	4.03353	4.28096	4.04293	3.43678	3.9856	3.41391	4.32949	4.19234	4.34561	5.62782
FBgn0037293	3.87776	3.97546	3.99798	3.51066	3.89736	4.13662	3.66809	3.67831	3.71244	3.75629	3.80549	3.82949	3.95627	4.17288	4.07919	4.1546	4.34119	4.32926	3.90704
FBgn0040294	2.26533	2.47704	2.30607	1.11682	1.9979	1.13671	2.63029	2.57823	2.70263	2.77303	2.70883	2.78383	2.31206	2.50586	2.18249	2.81316	2.73047	2.36582	3.96042
FBgn0033159	3.32109	2.49732	3.47221	0	0	0.147281	2.97871	1.36965	2.55923	1.90073	1.27242	1.80896	3.45782	3.74119	3.58337	1.78397	1.05307	0.862852	0.165315
FBgn0033155	2.86282	2.82492	3.27578	1.39586	2.11898	2.12857	3.26437	2.71301	3.44674	3.24515	3.01785	3.0855	3.02227	2.9824	3.07413	3.36076	3.29568	3.41045	6.71499
FBgn0033153	3.94198	4.17553	3.68318	3.13803	3.37186	2.90559	4.26918	4.75917	3.51983	4.17395	4.2556	4.01497	5.16225	4.90254	5.3078	4.98104	3.73348	5.29626	1.96581
FBgn0010313	4.27117	4.07598	4.20818	3.93015	3.3477	2.33789	5.33464	4.02229	4.7403	5.06014	4.02398	4.49	3.84058	3.9211	3.91744	3.56231	2.62098	2.44998	3.87524
FBgn0031639	3.34216	3.75519	3.35059	3.65841	3.6842	3.6246	2.90831	3.29121	3.11344	2.4185	2.99702	2.61813	2.86857	3.20584	2.96524	2.62075	2.7644	2.7236	3.50125
FBgn0015765	3.40705	3.08799	3.17453	1.07781	1.87203	0.765154	3.73016	3.80378	3.36875	2.50604	2.70879	2.42909	3.32588	3.23079	2.97579	2.54079	2.43601	1.98668	1.67027
FBgn0010316	3.28598	2.46167	3.41137	2.07615	2.10724	2.13717	3.4216	2.34343	3.28036	3.01494	2.85848	3.05997	3.43699	2.68537	3.49451	3.34449	3.16108	3.4586	4.31874
FBgn0010315	2.75688	3.1041	2.84166	2.68252	3.1004	2.66107	3.03667	3.17388	3.23017	3.81169	3.41733	3.82054	2.89749	2.97666	2.88923	3.68203	3.26943	3.57401	4.91546
FBgn0051862	2.5483	2.63413	2.19989	0.230865	0.0610337	0	0.984539	0.821806	0.468371	0.54315	0.487766	0.240361	2.74743	2.95885	2.38236	3.02134	3.3419	2.13159	0
FBgn0051866	2.7688	3.02128	2.74722	2.76145	2.4275	2.95723	2.44328	2.47993	2.3253	2.54339	2.72574	2.28448	2.49697	2.62885	2.37667	2.61353	2.97757	2.56176	3.4447
FBgn0051864	2.95693	3.27307	2.76114	3.65069	3.56033	3.43491	2.36442	2.51182	2.19602	2.50532	2.75083	2.33305	2.67213	2.86975	2.53813	2.5432	2.63229	2.47795	3.33307
FBgn0051865	2.35567	2.5633	2.33107	2.39452	2.13502	2.55148	1.98271	2.06332	1.90465	2.24502	2.33534	1.97562	2.11521	2.29551	1.96401	2.23447	2.58179	2.20752	3.00773
FBgn0015766	11.5873	10.7638	11.8019	4.90387	5.2762	4.81944	11.8645	10.4537	11.6951	9.16043	8.4301	9.06704	11.7572	11.4987	12.4095	9.32929	8.19887	9.02488	4.7832
FBgn0031637	7.42397	7.0591	7.55382	4.8985	5.17566	5.15329	7.32932	7.03284	7.23446	6.14259	5.89153	6.06934	6.61464	6.43329	6.7018	6.35014	6.64834	6.52912	5.87652
FBgn0031816	4.55237	3.57177	4.10277	0	0.211907	0.260269	3.38561	3.5899	3.16235	1.50658	1.04335	1.23143	4.23408	4.33269	4.64441	2.8645	2.10679	2.38329	1.48725
FBgn0265915	2.06826	2.59425	2.24385	0.444664	0.551902	0.198215	1.69643	1.77114	1.51638	2.55795	2.70145	2.68202	1.08743	1.56276	1.60659	2.89657	2.94335	2.90569	0.47426
FBgn0033464	4.10542	4.76003	2.56117	0.256309	0.211907	0.193213	0.506125	0.440404	0.601566	1.18161	0.883733	0.738279	1.4068	1.76644	1.48507	1.20495	0.939675	0.870551	1.8071
FBgn0039969	8.02249	8.26443	7.25776	8.35768	7.5032	7.52795	7.4116	7.49725	6.6346	6.74615	6.68908	6.52828	7.38651	7.23258	6.70818	6.86578	6.91131	6.52414	5.30574
FBgn0032208	5.44822	4.8519	5.86958	3.97585	4.75541	3.24659	6.61824	5.34881	6.51694	6.44066	5.85784	6.25716	6.00906	6.20827	6.53903	6.08156	5.6575	5.29077	5.24108
FBgn0041210	4.86929	5.02724	4.89653	2.73464	2.75951	3.03479	4.47441	3.95298	4.39263	4.93435	3.95627	4.52268	4.69312	4.84549	4.65085	5.00848	4.61592	5.75564	5.01973
FBgn0014411	4.83112	4.66859	5.0493	3.55512	4.43524	4.11086	5.56131	5.31573	5.59472	5.1717	4.88772	5.1944	5.10379	5.15469	5.25946	4.82445	4.97289	5.02431	4.82959
FBgn0086757	2.62897	2.51864	2.76805	1.62957	2.17357	0.646253	3.22357	2.84426	3.1511	4.01505	3.6331	3.73708	2.96541	3.07998	3.12529	3.1478	3.12989	2.72891	2.27628
FBgn0014417	2.23512	2.05488	2.73687	4.56834	4.77551	5.38695	4.29065	3.83182	4.78141	2.21439	2.40343	2.82957	4.49864	4.39428	4.51495	2.40131	2.16688	2.51616	6.22132
FBgn0002567	2.9083	2.10659	2.94825	1.72965	2.54423	2.88105	3.8055	3.4511	3.84508	3.10098	2.97768	3.17409	2.89717	2.77889	2.72461	2.98844	2.61263	3.02597	5.21548
FBgn0002566	5.62476	4.68231	5.77647	3.18101	4.09954	3.42674	6.3395	5.76192	6.15304	5.4153	5.21494	5.45922	5.4719	5.11546	5.59648	5.08853	5.04306	4.79261	2.30867
FBgn0002565	3.74435	3.90369	4.79464	9.8174	9.27945	10.7611	4.28227	4.88902	5.6336	5.66088	5.45227	7.02726	5.38249	4.96398	6.35591	5.02172	4.6059	6.62527	9.26567
FBgn0002563	1.4658	1.49166	1.14229	5.19079	5.3097	5.59971	1.987	2.75172	1.81424	3.58084	3.55587	3.54155	2.9167	2.97539	2.16452	2.59253	2.29393	2.69527	2.99398
FBgn0259822	4.55819	3.50094	4.21068	0	0.386404	0.227364	4.21466	2.14422	2.99863	1.37999	0.573221	0.920145	3.57138	3.40115	3.42942	0.814207	0.52966	0.423442	0.332259
FBgn0259824	4.92676	4.72414	5.02947	3.08356	3.26548	2.86494	5.34116	4.79616	5.37243	3.84899	3.63256	3.85397	4.42061	4.45817	4.56891	4.12783	4.11807	4.14146	4.89471
FBgn0003169	4.26758	3.91795	4.49156	3.49031	4.32171	3.99222	4.81569	4.15641	4.8042	4.35365	4.15248	4.38788	4.12626	4.02425	4.29713	4.53544	4.33839	4.34068	3.89787
FBgn0266570	3.59251	4.16957	3.65305	3.55565	4.64991	4.43754	3.83667	4.30854	4.0853	3.85063	3.93614	3.99693	3.70601	3.83851	3.14651	3.99013	3.8647	4.10275	7.25075
FBgn0003165	3.15233	2.72876	2.78731	0.728738	0.924075	0.654647	4.51585	2.77993	3.73573	2.49569	1.3859	1.97686	3.85574	3.60108	3.78526	2.28207	1.52968	1.14926	5.14024
FBgn0003162	3.99064	4.95965	3.24465	7.12425	6.09631	6.53183	3.95614	3.88065	2.73888	4.0545	3.68548	3.86912	4.59964	4.26022	4.40988	6.01948	5.4532	5.97895	2.99921
FBgn0042094	2.43287	2.37886	2.36453	3.5336	3.08974	3.62865	1.97519	1.97754	1.89068	4.22724	4.02671	3.93521	2.28784	2.24333	2.5227	3.74486	3.86586	4.17807	3.12847
FBgn0042092	2.01133	3.09697	1.90347	2.44506	2.75199	2.35496	2.15718	2.99017	2.12036	1.9875	2.199	1.91838	2.22535	2.47541	1.74902	2.27662	2.29651	2.09118	3.46573
FBgn0028398	5.28967	5.35089	5.07321	5.55705	4.97876	5.68409	5.01304	5.11538	4.65761	4.72593	4.93644	4.44643	4.84687	4.90653	4.65241	4.68655	5.07855	4.67841	3.71706
FBgn0052536	3.02627	3.30902	3.06959	3.47414	4.18803	3.67212	2.55427	2.94548	2.53686	3.29435	2.65182	2.74618	3.10178	3.09561	3.35305	2.65063	3.2507	2.68437	4.47234
FBgn0260771	1.90722	1.89083	2.01269	0.624331	2.23496	1.55457	2.21914	2.26844	2.57713	2.44953	2.33514	2.33113	2.406	2.45674	2.28747	2.22863	2.35829	2.483	4.06858
FBgn0024689	3.65733	3.70057	3.91321	3.68768	4.11651	3.8507	3.89723	3.81416	4.20998	5.53595	5.46174	5.27984	3.99975	4.2181	4.27979	5.0218	5.28142	5.1618	4.29325
FBgn0044871	4.31176	4.60837	3.9845	4.49635	4.35321	4.68188	4.14641	4.50793	3.86647	4.48028	4.66617	4.14793	4.16799	4.296	3.88086	4.44551	4.68955	4.37007	4.46328
FBgn0260775	5.61012	4.90291	5.35733	5.96494	4.97081	5.58765	5.16302	4.77592	4.8952	3.91558	3.88419	3.80103	4.48868	3.82011	4.54083	4.22419	4.1989	4.30791	2.81652
FBgn0022359	5.86713	4.85922	5.95469	8.10583	7.7274	8.07831	4.32099	4.36105	4.67489	2.86274	3.28445	3.70271	7.00946	5.97505	7.28006	4.54876	4.99101	5.56936	4.36203
FBgn0052511	3.1772	4.61399	3.16984	0	0.271126	0.102861	0.194182	0.538799	0.477208	0.19154	0.441618	0.0877636	0.176346	0.70828	0.411666	0.0765844	0.160116	0.106327	0.0553927
FBgn0003386	1.70709	1.97559	2.04651	0	0	0.0504182	0.855233	0.498958	0.680181	0.539004	0.564373	0.24669	2.30655	2.44926	2.74025	0.416934	0.608532	0.30681	0.0973174
FBgn0053120	2.26008	1.84421	2.07291	6.38821	7.19975	7.14178	2.85098	3.41198	3.00005	4.4402	4.35992	4.73932	3.58656	3.4627	3.62533	4.11157	3.61502	4.03724	2.57175
FBgn0085430	2.10286	1.67044	2.26923	0.473878	1.58705	1.11285	3.09005	2.13923	2.71432	3.25073	2.48903	2.92494	2.58022	2.71622	2.45538	2.70256	2.58077	2.3496	5.16054
FBgn0022355	9.82123	9.68411	9.48738	12.5735	13.3534	13.8548	9.26492	9.43589	8.88349	8.13184	9.60948	9.44098	7.57407	8.69552	8.49857	8.16005	8.9177	9.34165	8.41457
FBgn0035001	5.07415	4.68243	5.55261	2.96416	3.48805	2.58396	6.62166	5.36428	6.4827	6.02385	5.25284	5.92227	5.31473	5.53015	5.68561	5.55063	5.49472	5.30147	4.79762
FBgn0024973	4.16479	4.4883	4.19704	5.28573	5.29801	4.96756	3.74058	3.80474	3.9352	4.79273	4.89136	4.57581	4.0266	4.11035	4.09474	4.59823	4.88968	4.75057	5.9328
FBgn0038569	4.88776	5.02854	4.79344	6.10626	5.56521	5.5234	4.63456	4.66264	4.69119	4.95499	5.06615	4.79254	4.3669	4.52125	4.33831	5.2719	5.62999	5.39974	6.6733
FBgn0051032	1.03889	0.892976	0.925343	0.562367	0.65233	0.924575	0.948382	1.241	0.87631	1.52964	1.70855	1.49496	1.21231	1.05919	1.13989	1.76381	1.80533	1.79972	0.629113
FBgn0020261	3.04303	3.47651	3.28967	3.09726	3.75168	3.36552	3.29014	3.173	3.64654	4.09416	4.29809	4.06209	3.52983	3.77875	3.34072	4.31558	4.48531	4.37251	6.59048
FBgn0031842	4.9556	4.30233	5.08315	3.1655	4.50778	3.00948	5.75694	4.9755	5.70524	7.07751	6.56738	6.72768	5.39652	5.49732	5.70006	6.37218	6.45199	5.94119	4.48947
FBgn0028397	3.27397	2.54595	2.99771	1.19619	0.652353	0.829032	4.68719	2.19467	3.54247	2.32351	1.63344	2.08195	2.56869	2.37145	2.2106	2.26577	1.58582	1.52662	1.03251
FBgn0020269	4.59637	4.11956	4.31301	0.308413	0.0462448	0.993945	3.63235	3.25842	3.02943	2.04103	2.06351	1.79711	5.36581	5.42989	4.93238	5.558	5.6793	5.82254	1.40509
FBgn0261276	5.20885	4.98756	5.54583	4.60982	5.41017	5.03754	5.46924	5.03649	5.47601	5.02768	4.95407	5.09812	5.00023	5.17992	5.13271	4.84441	4.77097	4.85471	5.18384
FBgn0261277	3.98718	4.00792	2.96205	6.73419	6.18473	5.7445	1.12792	1.5543	1.13288	1.6214	1.65381	1.51604	2.47109	2.51202	2.33903	1.72909	1.71439	1.75107	1.7451
FBgn0036688	4.4758	4.63585	4.17668	0.643742	1.01799	0.823589	2.81885	2.69473	2.74434	1.98741	2.12089	1.64787	3.68081	3.91905	3.12049	2.15156	2.01819	1.69722	4.54812
FBgn0261270	3.8972	3.90042	3.91133	4.01933	4.60345	5.02709	3.76873	3.95065	4.11797	3.97712	4.35575	4.10721	4.16515	4.03469	4.03026	4.37825	4.56882	4.63371	6.50307
FBgn0031837	1.34112	1.70692	1.41526	0.7899	0.795138	0.306481	1.60041	1.43826	1.75493	0	0.255979	0.168292	0.732118	0.870295	0.675754	0.546305	0.519379	0.451419	0.283338
FBgn0031836	7.84502	7.89896	8.10485	6.43957	7.08182	6.67255	8.56252	8.15844	8.47063	5.8294	6.15439	5.64093	6.88787	7.30403	7.09154	6.73994	6.93965	6.88757	5.39627
FBgn0031835	1.02001	0.894384	1.38971	0	0	0	2.33732	1.29843	1.93833	2.60893	1.50771	2.28437	0.282916	0.348931	0.368085	2.90321	1.18497	2.60822	0.269467
FBgn0261278	2.60394	3.00598	2.71327	2.29601	3.04443	3.232	2.64037	3.36251	3.65203	3.35863	3.29456	3.20634	3.96909	3.80921	3.74022	3.81521	3.87654	3.76121	7.86399
FBgn0031830	8.69555	8.48463	8.36656	9.72109	9.17617	9.69473	8.09359	8.14292	7.59483	6.49161	6.39862	6.19158	7.43852	7.2399	7.32288	6.45177	6.52363	6.50185	6.29366
FBgn0038519	5.13327	5.0639	5.15251	6.51082	6.42067	6.98537	5.15201	5.20255	5.29744	4.3914	4.57939	4.68751	4.86647	4.88091	5.05828	4.58345	4.48749	4.84857	5.39329
FBgn0020416	7.00438	8.7067	7.31566	7.00242	8.0908	5.9214	5.29362	6.00175	5.11141	5.9053	6.55081	5.45265	9.11902	10.3494	9.15762	7.23537	7.51353	6.46689	1.87222
FBgn0040233	3.26413	2.53253	3.33141	1.27557	1.10885	1.47568	4.97997	2.8819	4.16725	3.94825	2.72921	3.39175	3.8435	3.58004	3.88298	4.23156	3.63925	4.315	3.13314
FBgn0262966	1.64236	1.15264	0.750903	0	0	0	2.66083	2.22434	1.69103	0.191253	0.16623	0.0386281	1.99412	1.81971	1.18349	0.0861322	0	0.0399074	0
FBgn0052075	2.51934	2.80514	2.39882	1.88688	3.12425	2.50971	2.76543	3.47284	2.71966	2.98547	2.99685	2.84419	2.62622	2.78909	2.37642	2.9337	3.18167	2.71019	2.35844
FBgn0052076	2.81983	2.61994	2.72844	3.23065	3.3993	3.58346	3.12186	2.86428	3.25412	3.87533	4.25038	4.01597	3.57761	3.45073	3.74396	4.01871	3.86817	4.20188	4.4361
FBgn0064766	5.03491	5.07948	5.06592	5.46337	5.35787	5.3135	5.00486	4.908	5.1167	6.06589	6.03823	5.78952	4.73867	4.91338	4.88825	5.96193	6.17042	6.19504	5.82148
FBgn0031161	4.30131	4.74098	4.49013	4.84057	5.09923	5.15511	4.0824	4.2392	4.11419	4.52814	4.76803	4.51639	4.17361	4.43508	4.18679	4.90156	4.75014	4.94394	4.54288
FBgn0015221	8.09977	7.52463	8.03647	9.72058	11.1222	10.212	9.28616	9.32791	9.04748	9.00153	9.17357	9.11414	9.35204	9.43891	9.35794	8.73151	8.37675	8.60975	6.57546
FBgn0015222	8.66697	8.76865	8.52454	11.8268	11.5106	11.7245	9.34875	9.59496	9.07248	9.08573	9.25152	8.89393	9.24541	9.41802	8.80648	9.1234	8.93939	9.34817	7.80735
FBgn0038173	2.9846	3.89859	3.39263	1.24915	1.43288	1.25621	0.804249	1.14629	1.32285	1.09693	1.50965	0.903267	1.08142	1.299	1.4094	0.743174	0.636378	0.801176	0.764138
FBgn0038172	2.39953	2.6034	2.50718	8.68822	7.99719	8.4954	2.52943	2.98759	2.66594	3.84827	3.72784	3.96314	3.49756	3.24395	3.48379	3.49804	2.95549	3.69695	3.47453
FBgn0030786	4.26254	4.71945	4.16992	6.21996	5.90857	5.74944	3.91975	4.34398	4.0328	3.8176	4.20454	3.76394	3.9553	4.04084	3.7304	4.237	4.36314	4.22347	5.63699
FBgn0030787	1.94636	2.04471	2.12414	1.40726	1.96831	1.43247	2.38812	2.44156	2.57762	2.61204	2.66032	2.48753	2.58374	2.20913	2.30307	2.49265	2.41859	2.28299	4.92041
FBgn0265356	8.53971	8.47307	8.9466	1.06347	1.57969	1.80192	7.35483	7.19642	7.24526	4.6062	4.6512	4.44536	8.29487	8.09722	8.25462	4.75484	4.61862	4.51185	4.14116
FBgn0265351	2.49736	2.91155	2.42139	3.7543	3.64388	3.44697	2.45159	2.50167	2.4609	2.95101	3.37891	2.96837	2.35699	2.95977	2.42374	2.61592	2.97141	2.80328	2.98477
FBgn0030788	3.46793	3.18228	3.43643	3.50482	3.94124	3.70263	3.93956	3.64024	3.66178	3.92009	3.4042	3.72772	3.74706	3.6364	3.72839	3.78598	3.77851	3.79051	4.28099
FBgn0030789	1.78744	2.98114	1.8097	2.86636	2.97062	3.21675	1.78053	2.62685	1.96279	2.16786	2.42516	2.26682	1.97385	2.44764	1.81578	2.70882	2.5414	2.68273	4.60308
FBgn0011693	2.82133	3.05426	2.92531	0	0	0.194534	3.10765	3.11878	3.07065	0.277046	0.245117	0.24842	4.6221	4.88433	4.21255	2.75093	2.62543	2.67243	4.7159
FBgn0011695	10.4003	10.7751	8.80984	4.43351	5.3512	4.53857	6.39351	6.55125	6.34341	7.60577	7.58355	6.05475	7.02598	7.39026	6.58295	6.92814	6.85556	5.83863	5.05572
FBgn0027835	6.11925	6.18008	6.29685	6.13952	7.90999	6.56193	6.93271	6.92968	6.99942	8.18691	7.83782	8.14246	6.84257	7.22024	7.23928	8.29124	8.33259	8.2914	6.42341
FBgn0264343	0.683621	0.413799	0.615546	0	0.124871	0	1.23658	1.13751	0.951963	0.149314	0.0805306	0.101298	3.09874	2.15766	2.48514	0.129043	0.0707107	0.054519	0.0299657
FBgn0040793	9.25936	9.19785	8.91333	10.6954	10.0893	10.3456	8.46304	8.46457	8.0091	6.78495	7.18306	6.72515	7.97393	7.80557	7.81386	7.24089	7.33556	7.23561	7.39952
FBgn0051676	9.00016	7.9556	8.91654	3.79283	3.19414	4.38	7.34739	7.42009	7.2315	6.0407	5.93366	5.79125	5.95575	5.84335	6.2763	3.74269	3.41655	3.6094	2.13149
FBgn0051675	4.18099	3.57499	4.42729	0	0.0946517	0	4.03617	4.18432	3.81056	1.63223	1.89471	1.61734	4.32863	3.54409	4.37941	1.98747	1.53809	1.80113	0.377364
FBgn0051673	4.42007	4.22489	4.3863	3.39195	4.13371	5.00499	4.59104	4.43627	4.52962	4.34249	4.52383	4.57384	4.11517	4.26803	4.22224	3.6546	3.36878	3.66353	3.04054
FBgn0026309	1.94191	1.9093	2.02073	1.08256	1.69584	1.57481	2.00342	2.01567	2.05534	1.86599	2.01706	1.93487	2.0025	1.93009	2.02568	2.42454	2.4372	2.18507	4.00836
FBgn0051216	4.17517	4.46377	4.46037	0.784081	0.412586	0.600527	4.25848	4.63926	4.08057	2.37028	2.57776	2.50743	4.60885	4.85693	4.77761	4.83849	4.50565	4.78537	2.59377
FBgn0029629	6.72888	6.89784	6.72578	8.25961	8.21818	7.89357	6.44952	6.4842	6.509	7.73539	7.72631	7.77196	6.73159	6.43004	6.71912	7.27657	6.75119	7.32001	6.87577
FBgn0014000	3.50661	3.8975	3.32451	10.2	9.57222	9.69375	3.45871	4.16709	3.41241	4.4164	4.86091	4.57071	4.68282	4.65581	4.65948	4.00623	3.85074	4.07929	3.77816
FBgn0262609	2.33646	3.42922	2.18236	0.589313	0.295559	0.349664	5.19363	5.96514	4.85853	2.80994	2.97483	2.07812	1.70509	1.76139	1.59144	1.76277	1.72425	1.55174	1.25027
FBgn0026582	2.33132	2.78335	2.52092	1.44946	1.30443	1.50475	2.01442	2.28142	2.17728	1.79443	1.79648	1.69673	2.43363	2.63853	2.35094	1.65911	1.56179	1.82015	4.19525
FBgn0040236	4.43694	4.61638	4.52978	4.09005	4.30472	4.04598	4.65563	4.32689	4.65603	4.88465	4.70483	4.80422	4.49009	4.93105	4.72836	4.63302	4.99796	4.68893	5.83004
FBgn0039773	3.17511	3.2731	3.15834	2.36108	2.84836	2.02232	3.09936	2.90883	2.92296	2.76883	2.73265	2.54707	3.11848	3.25269	2.94216	2.71193	3.0141	2.75305	3.03774
FBgn0039774	0.482065	0.431467	0.741574	0	0	0	0.472111	0.234524	0.507019	0.227345	0.378514	0.206267	1.11498	0.855762	1.46462	0.261025	0.168304	0.239483	2.6138
FBgn0039776	4.22396	4.5739	4.62944	5.98111	6.43756	6.91248	4.91103	5.25862	5.1741	5.4784	5.86066	5.70684	6.78913	6.67649	7.01513	8.94786	9.22916	9.24888	4.06746
FBgn0051495	1.69995	1.8836	2.00494	1.43468	1.85702	2.27777	2.14859	2.22256	2.28535	1.9338	1.90857	1.96525	1.58705	1.63995	1.48877	1.65424	1.82823	1.87886	3.61444
FBgn0037199	6.97292	7.4465	6.31893	8.09819	7.75808	7.52549	6.21222	6.57115	5.83062	5.21514	5.66559	4.96388	6.25431	6.26357	5.82105	5.57934	5.9158	5.33104	7.13644
FBgn0037643	7.70667	7.32827	7.78836	8.35592	8.66791	8.95906	7.91224	7.66981	7.84639	6.70769	6.82201	7.06942	7.08677	7.05314	7.35381	6.57839	6.71733	7.00206	6.53636
FBgn0037312	5.32807	5.77804	4.7508	6.89029	7.18739	6.4574	4.86582	5.47984	4.44533	6.80187	6.92963	6.23297	5.41448	6.08306	5.34102	6.45729	6.96534	6.50887	6.13075
FBgn0037313	6.1857	6.08148	6.047	7.1553	6.66819	7.00818	6.04682	5.96413	5.9102	5.63514	5.82115	5.61866	5.95497	5.8567	5.92769	5.82634	5.80771	5.96642	5.69149
FBgn0037646	1.66569	1.90074	1.78272	3.37499	4.48363	4.2911	1.93316	2.2141	2.08465	2.759	3.024	2.8049	2.39017	2.45645	2.48611	2.30546	2.11999	2.30042	2.09622
FBgn0037647	3.94874	4.14847	4.02337	4.31468	4.20279	4.35892	4.21749	4.20335	4.2538	3.78863	3.94877	3.85842	4.13066	4.17576	4.0923	4.13727	3.99306	4.1978	3.87528
FBgn0041775	5.13479	5.0193	5.38394	4.48062	5.32096	4.79178	6.15714	5.76559	6.56991	6.1825	5.38311	5.82133	6.42298	5.35902	5.36674	5.73057	5.70618	5.62805	9.86915
FBgn0037317	3.40157	3.3924	3.19837	3.50862	3.2782	3.19891	2.68233	2.91278	2.85886	3.06849	3.24872	2.94173	3.08832	2.97765	2.85855	3.23959	3.2644	3.06599	4.13122
FBgn0037648	4.38123	4.00927	4.42955	3.70467	3.87165	4.57431	4.48723	4.12136	4.41277	4.29852	4.1962	4.19476	4.26454	4.1547	4.4759	5.06471	4.56643	5.26602	4.28138
FBgn0265760	0.524608	0.804026	0.75967	0.166911	0.398099	0.403631	0.414085	0.602613	0.374346	0.412217	1.10961	0.511867	0.619707	0.750687	0.88601	2.04763	2.80376	2.58577	0.0934907
FBgn0000157	3.82494	3.62955	4.18631	0	0.124871	0	1.78828	1.23774	2.24695	1.11634	0.798651	0.891739	0.67728	0.713234	0.93268	0.328371	0.359762	0.257035	0.155426
FBgn0000150	8.79148	9.13358	8.06607	12.3705	11.8851	12.0304	8.88976	9.05476	8.26259	8.41243	9.15187	8.68544	8.51791	8.56919	8.36098	8.79823	9.16906	9.01997	9.74564
FBgn0000153	4.94147	5.40123	3.39689	0.87071	1.32216	2.51907	2.13528	2.50726	1.51798	1.38729	1.97735	1.11164	3.7316	4.2446	2.91939	1.63666	2.33834	1.31108	3.88413
FBgn0027509	3.30911	3.92228	3.55002	2.11823	2.54259	2.40368	3.24228	3.40697	3.4818	3.7598	3.87986	3.78616	3.63448	3.9831	3.65279	3.99989	4.21886	4.10652	5.44428
FBgn0267810	1.79428	2.37182	2.34123	0	2.3108	0.100544	1.6326	1.94638	0.83093	1.59107	0.996439	2.42248	0.954087	2.77571	2.31445	1.71325	1.52968	1.87557	2.16999
FBgn0031320	3.57256	3.74317	3.52073	5.40223	5.33611	5.98085	3.53812	3.89325	3.7516	4.52871	4.80146	4.4	3.7152	3.9622	3.77735	4.41352	4.65418	4.70843	4.82532
FBgn0262108	2.99847	3.52066	2.49871	4.16992	3.81365	3.83873	2.43068	2.62425	2.27703	2.25054	2.61965	2.35908	2.95253	2.8504	2.46268	2.81177	2.99246	2.44205	3.08849
FBgn0283712	3.22087	2.80157	3.54483	1.30151	2.00342	1.09265	4.04199	3.2275	3.89622	3.7751	3.23621	3.89434	3.3268	3.21947	3.47099	3.23756	3.30711	2.9503	4.25469
FBgn0061469	3.64078	3.58672	3.59967	4.0591	3.84447	3.94073	3.5375	3.14241	3.41617	4.4732	4.30427	4.16232	3.66434	3.68864	3.61161	4.21792	4.48635	4.24909	5.30459
FBgn0032925	3.25744	4.37792	3.27706	2.84565	4.10446	3.57349	3.65496	4.41773	3.91381	4.04926	3.91674	4.04082	3.64167	4.15662	3.449	4.15032	4.06811	3.9954	5.68587
FBgn0004436	6.13637	5.22761	5.99927	4.1847	4.72712	3.8596	6.68151	5.88657	6.15376	5.76059	5.23592	5.60281	5.83105	5.39298	5.91869	5.67599	5.42932	5.13039	4.0243
FBgn0032922	2.88912	2.88762	3.03367	4.40002	3.94692	4.23846	2.90346	2.77392	2.64988	2.96665	3.0324	2.75743	2.74165	2.69634	2.74031	2.80894	2.94403	2.9886	2.69618
FBgn0032923	3.71633	3.44831	3.72668	3.28058	4.2071	3.99941	4.45576	3.87364	4.22379	5.02056	5.20711	5.07391	4.57507	4.50624	4.75989	5.29351	5.21623	5.43718	4.52217
FBgn0004387	5.01129	5.15497	5.09744	3.20366	3.56827	3.19596	4.71293	4.15766	4.53117	4.62524	4.2053	4.78167	4.68442	4.68587	4.9452	4.67245	4.50636	4.64776	5.18674
FBgn0004381	3.4342	3.50309	3.38474	2.00883	2.78492	2.83433	3.13196	2.98862	3.02179	2.86801	2.89065	2.82306	3.02118	3.16079	2.81594	2.82183	3.17155	2.98118	4.77652
FBgn0261850	2.43349	2.65313	2.53243	2.71595	3.12205	3.013	2.13015	2.36354	2.61184	2.86635	3.11679	3.03081	2.61818	2.70086	2.58443	3.26658	3.20517	3.32907	5.52835
FBgn0000355	2.8845	1.40978	1.05229	0.6026	0.550598	1.28032	5.42706	7.63522	0.222452	2.44575	1.12872	1.09431	2.48373	1.42325	0.378429	2.93593	1.2577	0.838306	9.80453
FBgn0259989	0.61991	3.38248	2.74115	9.64137	8.72051	9.33246	0.11216	1.32576	1.39006	0.338165	1.64634	0.206833	2.07364	2.13793	0.108488	3.7505	1.14211	1.57102	0.945201
FBgn0004657	6.22914	6.12449	6.28379	2.07377	3.54676	2.11104	6.88766	6.06882	6.51022	5.8924	5.37559	5.91413	6.37781	6.66088	6.36787	5.37166	5.21393	5.20622	4.08232
FBgn0004656	3.80558	3.74753	3.86461	2.94392	3.24439	2.56804	5.52098	3.96093	4.44038	4.89473	3.89082	4.38816	3.95364	4.20396	3.99277	4.37254	3.82865	3.60955	5.5196
FBgn0004655	3.35228	2.90475	3.6443	1.80035	2.91357	2.46298	4.44441	3.33252	4.32662	4.73463	4.19683	4.47047	3.83895	3.81317	4.01722	4.54839	4.57746	4.28594	5.97452
FBgn0004654	6.31407	6.91701	6.07704	10.5584	10.2936	10.4249	5.78387	6.39836	5.90768	6.7526	7.26661	6.97465	6.13034	6.4844	6.30257	6.45544	6.81388	6.8858	7.34115
FBgn0004652	2.31709	1.75915	2.46529	0	0	0.0749816	3.01047	1.61252	2.10283	0.7309	0.0609378	0.505955	1.46839	1.54998	1.57163	0.423511	0.20178	0.110903	0.754743
FBgn0035228	6.48159	6.23182	7.08435	6.77197	6.5153	7.73522	6.26605	6.08411	6.57674	5.56037	5.54238	5.92383	5.87281	5.71794	6.20525	5.67437	5.3597	5.89523	5.91371
FBgn0053138	6.16522	5.83079	6.21163	9.66148	8.98689	9.94724	5.74428	5.62065	6.21361	5.27688	5.46612	5.91931	5.31125	5.28994	5.71869	5.41907	5.58679	6.00247	6.75441
FBgn0036099	4.23786	4.44729	3.91303	3.96516	3.58954	4.18888	4.12351	4.27893	3.93422	3.35982	3.45448	3.25344	3.83657	3.74302	3.24685	3.56437	3.69143	3.2969	6.21541
FBgn0259982	3.31801	3.65607	2.98719	2.18875	2.40559	2.22391	2.37564	3.14455	2.57149	2.91537	2.82838	2.49315	2.98545	3.10975	2.71814	2.70979	2.86961	2.26298	3.53401
FBgn0033527	3.68095	3.31543	3.42541	1.58133	2.11457	1.76873	3.90475	3.7393	3.53575	3.19404	3.40607	3.03579	3.25397	3.42459	3.20882	2.93304	3.21307	2.82198	2.71491
FBgn0033523	4.71175	4.10921	4.59128	2.92513	3.06703	3.91287	4.19341	4.27521	4.06604	3.29568	3.48773	3.27569	4.04629	3.94226	4.04399	3.34206	3.58859	3.30592	2.43667
FBgn0025373	2.41546	2.00209	2.46159	1.19755	2.06637	2.24766	2.86202	2.57967	3.28948	3.11499	3.01326	3.26245	3.26823	2.93284	3.38274	3.13107	2.98666	3.37083	3.45849
FBgn0033521	2.81299	2.66235	3.20232	4.92133	5.17932	5.53951	2.01943	2.97665	2.59997	2.66399	3.26692	3.17505	2.94191	3.25044	3.7378	2.4363	2.87996	3.18011	2.23045
FBgn0013995	6.30207	6.04649	6.7356	0.300282	0.460769	0.630138	7.76789	6.82929	7.16124	2.48159	2.16949	1.96176	5.66904	5.38567	5.88581	2.67115	2.72589	2.62962	5.68227
FBgn0033529	5.71223	5.52931	5.66067	5.2411	5.19566	5.81493	6.05474	5.94756	5.66181	5.22108	5.30927	5.15621	5.64298	5.57868	5.65666	5.22302	5.2298	5.3388	4.67972
FBgn0033528	3.98333	3.93254	3.85883	3.30979	3.03451	3.97513	3.70791	3.72665	3.518	3.93253	4.14203	4.02993	4.10068	3.77702	3.95898	4.21026	3.98087	4.05141	3.53562
FBgn0037519	0.165822	0.0430514	0.221184	0	0	0	0.247261	0.311061	0.440085	0.389583	0.492336	0.157978	2.70841	1.755	2.55423	2.93118	2.34284	2.49398	0.685452
FBgn0053099	2.8056	2.14564	2.70731	1.37545	1.65288	2.65221	3.0937	2.16262	2.64635	1.22818	0.710093	1.54497	1.87044	1.55503	2.11555	3.79644	2.13949	5.1078	1.72974
FBgn0035254	3.41273	3.42226	2.85264	3.69259	3.13586	3.79755	3.00615	3.31729	2.71378	3.02576	2.75953	2.64312	2.84686	2.70063	2.26981	2.86219	3.14314	2.77875	3.70089
FBgn0035253	3.47022	3.36154	3.83368	2.27891	3.70081	2.96958	4.13024	3.59522	4.19883	4.75869	4.42278	4.73936	3.9935	3.95703	4.10929	4.70047	4.68002	4.71211	5.0757
FBgn0035252	4.131	4.34244	3.82619	4.5511	4.8741	5.32955	3.64268	3.85038	3.80932	4.93714	5.17483	4.91504	4.14566	4.27038	4.20299	4.80059	4.84926	4.89456	5.28195
FBgn0035251	5.61876	5.87467	5.60488	4.03182	4.57185	4.37887	5.81391	5.63528	5.63883	5.39482	5.53057	5.5321	5.6234	5.87025	5.66324	5.38236	5.40553	5.32733	4.85359
FBgn0035227	3.65423	3.32842	4.19418	6.81029	6.91807	6.84121	4.42287	3.85156	4.56381	4.83783	4.75621	5.00789	4.14622	4.25045	4.53026	4.78552	4.67096	5.00029	4.21835
FBgn0002174	5.20353	5.55994	5.14304	6.83387	6.71829	6.98612	4.73218	4.96924	4.9173	4.47939	4.82204	4.55054	4.53879	4.76928	4.61037	4.68119	4.73359	4.79323	6.3978
FBgn0027085	2.92808	2.9105	3.14085	2.67939	2.96447	3.00856	2.68157	2.46212	2.95879	3.07514	3.12379	3.08057	2.81886	2.83203	2.83317	3.37905	3.36871	3.57377	4.58315
FBgn0066114	3.42535	3.29791	3.3088	2.67576	2.91663	3.0705	2.56351	2.56638	2.52687	2.90194	2.90807	2.62259	2.81573	2.69359	2.56936	3.62545	3.775	3.65435	3.69367
FBgn0013334	4.58912	3.62877	4.09628	4.45129	4.43658	4.21627	5.54466	4.46029	5.32786	5.83435	5.40008	5.64038	4.21654	4.11416	4.33551	5.47008	5.61716	5.6642	5.43742
FBgn0028687	6.7091	6.53415	6.46925	7.58617	6.64956	7.2103	6.23569	5.93455	5.95145	6.72135	6.61241	6.53267	6.39207	6.32324	6.22966	6.80567	6.75082	6.78173	7.35806
FBgn0028684	5.01047	4.87089	4.86047	4.72462	4.5807	4.23505	4.96236	4.63016	4.72142	5.1995	5.06864	5.03228	4.92383	4.97295	4.81792	5.02976	5.07609	4.95064	5.26263
FBgn0028685	5.48124	5.25352	5.38871	5.5415	5.15653	5.32499	5.37048	4.89845	5.2143	5.56604	5.67278	5.53461	5.566	5.42227	5.45108	5.76503	5.74696	5.81886	6.49473
FBgn0013997	4.40506	4.28262	4.61921	1.77619	1.91513	1.36981	5.79463	4.7335	5.60821	5.12962	4.75319	5.29361	4.57862	5.00537	4.97043	4.86744	4.82833	4.22568	1.77223
FBgn0028683	3.94221	4.5569	3.44566	4.96773	4.62258	4.32007	3.46771	4.16079	3.3694	4.69066	4.68363	4.16284	3.98104	4.08668	3.3937	4.13884	4.52285	4.11662	3.92474
FBgn0264982	2.10286	2.49106	2.50512	5.95276	5.31477	6.30073	2.85729	3.33927	3.09313	6.43743	6.48106	6.65604	4.89933	4.78095	5.15527	7.62613	7.04846	8.39044	2.07556
FBgn0264987	2.6788	4.81121	3.00582	0	0.362739	0	1.95001	4.04823	2.1022	0.261169	0.814668	0.279539	0.666588	1.9735	1.24687	0.892874	1.24485	0.497004	0.19564
FBgn0028688	6.37613	6.35568	5.99975	7.14961	6.32514	6.63105	6.01134	5.90028	5.61676	6.12349	6.18835	5.91739	5.87142	5.81702	5.59853	6.30384	6.33175	6.32639	7.46764
FBgn0028689	6.29816	6.5202	6.45153	7.65049	6.9098	7.35248	6.47607	6.52514	5.97186	6.43722	6.31504	6.46965	6.27537	6.08088	5.89223	6.32095	6.30122	6.79031	6.38736
FBgn0030234	6.93762	7.88646	6.65652	1.1412	1.0941	1.35974	6.67299	7.14566	6.26187	5.79766	5.78065	5.87963	6.30205	6.71792	5.87153	5.31217	5.57251	5.01524	2.66217
FBgn0037515	5.61547	7.0187	5.66232	6.53144	6.56004	6.02383	3.58614	3.97051	3.44136	3.5661	4.30928	3.25765	4.49428	5.442	4.33327	4.87977	5.25291	4.59172	4.40479
FBgn0052191	5.54289	5.33239	5.41564	5.65571	5.02105	6.04364	2.18519	2.21791	2.62404	2.1005	2.13056	2.30291	3.69082	4.02368	4.02354	2.46871	2.1438	2.72594	1.51469
FBgn0052190	6.36858	6.31601	6.27285	5.01707	6.6021	4.68228	7.05036	6.88381	6.77781	8.21904	7.83829	7.95507	6.74984	7.41345	7.38998	7.45525	7.82104	7.44125	4.06306
FBgn0062961	0.64464	0.756556	0.60376	5.5873	5.28376	4.98884	0.806257	1.23192	0.709199	1.65157	1.60293	1.27925	1.59284	1.31775	1.13831	1.22745	1.02472	0.951446	0.308006
FBgn0250874	4.48854	4.91696	4.45121	5.07743	5.39859	5.56024	4.15256	4.58732	4.45367	4.01463	4.4306	4.04037	4.02982	4.48186	3.93821	4.37357	4.45787	4.43143	6.41535
FBgn0250871	6.23032	6.26065	6.1418	1.25888	1.31795	1.20553	5.78977	5.38344	5.51457	5.11939	4.8999	5.36656	4.44178	4.70968	4.55787	4.90254	4.98605	4.79605	1.74152
FBgn0039965	4.22579	4.35865	4.15795	4.6945	4.2712	4.45865	4.09967	4.27115	4.10636	3.66404	3.78675	3.777	4.63923	4.35309	4.34633	3.89321	3.6468	3.77377	4.26905
FBgn0052666	3.34273	2.62586	3.38411	4.26281	5.2065	4.99397	4.46146	3.51685	4.32449	7.02442	6.10887	6.71609	4.26718	4.11199	4.4854	4.77117	4.49714	4.75931	5.02532
FBgn0032204	3.74004	3.4276	3.56937	2.45116	2.64243	2.88454	3.5291	3.59192	3.45078	3.41864	3.48135	3.22432	3.44943	3.29354	3.17332	3.3363	3.70035	3.26325	3.10799
FBgn0030300	4.35014	4.04534	4.38876	1.72662	1.17107	1.97007	3.3986	3.21849	3.21882	3.48751	3.63512	4.06703	2.58554	2.80059	3.01172	4.91516	5.18709	5.15233	2.17512
FBgn0002719	7.32221	8.56931	7.81076	11.069	11.4844	12.0437	7.52666	8.5633	8.29631	8.97149	9.22553	9.47963	8.27245	8.82057	8.78846	7.45042	7.8467	8.626	8.80995
FBgn0039966	3.09179	3.23387	3.19458	2.95731	2.78382	3.30177	2.8271	2.74393	2.9359	2.86667	3.21172	2.8464	2.99934	2.98461	3.19407	3.08704	3.12674	2.99463	3.91396
FBgn0064117	3.07981	2.74022	2.17751	3.89114	4.13105	3.90794	2.4806	2.53242	1.97773	2.80318	2.55919	3.22403	2.19965	2.3552	2.5104	2.04231	3.24191	2.26098	2.46093
FBgn0032200	7.9794	8.00847	7.73193	6.03525	5.4087	5.73743	7.37352	7.49325	6.64088	5.53753	5.55303	5.29497	7.32151	7.32311	6.75484	6.0545	5.94129	5.66635	3.22754
FBgn0023479	3.0414	2.22056	2.8463	6.93191	8.45232	7.18556	3.65082	4.16303	3.89677	5.87282	5.7791	6.34887	4.24784	4.21913	4.35159	5.37582	4.88853	5.05992	3.39684
FBgn0031713	5.68579	5.91012	5.39523	6.97311	6.70315	6.54869	4.83066	5.06457	4.80407	4.8402	5.06889	4.57276	4.8694	4.90951	4.80122	4.70171	5.03371	4.71663	5.98775
FBgn0052448	4.81338	4.96512	4.00296	6.01177	5.41449	5.1421	3.8342	3.82423	3.10926	3.70399	3.7729	3.37516	4.08819	3.92492	3.74186	3.99072	3.95908	3.68336	3.01295
FBgn0033453	3.39941	2.95955	3.48094	2.77956	3.57729	3.62705	5.21491	4.73971	5.29908	4.14966	3.94887	4.19469	4.01425	3.55598	3.99399	3.87726	3.94468	3.88622	3.17725
FBgn0260400	2.74301	2.77086	2.78314	3.02	2.74429	2.72467	3.88134	2.55943	2.88752	2.74483	2.12093	2.46724	2.57361	2.56112	2.34195	2.19543	1.53694	1.85167	0.624604
FBgn0031711	4.46325	4.73698	4.17834	6.02508	5.69718	5.53865	4.02634	4.21831	4.06376	4.45524	4.72286	4.36702	4.23048	4.24273	4.05945	4.37539	4.75801	4.56044	5.90977
FBgn0260407	3.94933	4.26576	3.92476	3.35133	3.54734	4.01356	3.64194	3.91057	3.75886	2.98959	3.20386	3.08766	3.47466	3.66858	3.33934	2.97294	3.03895	2.9048	3.98674
FBgn0052446	6.289	6.3968	6.08577	7.36557	6.69388	7.10218	6.40243	6.58808	5.94989	6.98716	7.11027	6.7608	6.67975	6.49325	6.45226	6.61824	6.87003	6.80196	4.87532
FBgn0040718	6.90859	6.47819	6.95565	1.97108	2.48465	2.42448	4.53897	4.85112	4.73912	4.10422	4.54904	3.90327	4.71261	4.61973	4.89837	2.82755	2.7848	2.86857	1.05316
FBgn0264574	4.70163	4.78788	4.78554	1.16965	1.00801	1.4161	3.82087	3.57334	3.9854	3.49448	3.58761	3.07553	3.52517	3.38944	3.59062	4.47786	4.7671	4.51592	5.79705
FBgn0036091	2.47667	4.85598	4.27401	2.19534	3.1235	4.54866	4.37506	5.35376	6.91216	4.35356	4.29491	5.60842	15.4618	15.209	16.0179	7.32935	2.92277	3.15796	1.25194
FBgn0265298	5.1211	5.69101	4.80662	6.22781	5.87632	5.84469	4.57815	5.01675	4.54271	4.71198	4.93738	4.63143	4.78059	4.74563	4.42392	5.0839	5.23135	5.20485	6.62189
FBgn0265297	6.21306	6.86272	6.41091	7.46183	7.35056	7.17089	8.5141	6.32349	6.33665	8.22161	7.72635	7.8686	6.57017	6.69323	6.41604	7.0675	6.09028	6.31115	6.57609
FBgn0260660	5.52139	5.26191	5.82557	0.332536	0.504691	0.167545	4.42712	4.38307	4.28247	1.69843	2.07325	1.39194	4.38438	5.72249	4.65608	2.08896	2.08625	1.47639	1.81808
FBgn0003449	5.32325	5.1919	5.19424	4.0699	4.67914	4.957	5.33974	5.52068	5.03784	5.06708	4.98863	4.85567	5.13937	5.00964	4.98362	4.99409	5.08006	4.95058	4.87905
FBgn0085802	5.00588	4.5728	5.29937	7.03848	6.2651	6.41242	6.07673	5.56189	5.26156	5.59454	5.43196	5.16521	5.50195	5.18818	4.91181	5.24432	4.98961	4.99516	4.34436
FBgn0259678	5.90335	5.92493	5.69508	0	0.239789	0.238048	5.49593	5.18382	5.14128	2.27333	2.25732	2.08361	5.29769	5.30753	5.18621	3.68548	3.35141	4.10975	3.18819
FBgn0031701	4.62527	5.03201	3.54713	12.3805	11.0459	10.4289	4.79756	5.41775	3.56797	5.34737	5.42213	4.71766	6.18291	5.66986	5.06541	5.5912	4.61997	4.29762	1.81757
FBgn0030041	5.81608	6.26216	5.23178	12.2148	11.7153	11.3513	5.84718	6.62408	5.50905	7.15398	7.44746	6.77839	7.0276	7.08363	6.49959	6.68422	6.38987	6.28535	5.03742
FBgn0037778	1.87848	1.79934	2.07883	0.459345	1.81539	1.08128	1.98154	1.81601	2.00176	1.74465	1.8751	1.86829	2.01787	1.89475	1.98513	1.87399	1.94224	1.65216	2.07805
FBgn0030040	3.20666	3.55552	3.07981	7.8617	7.22294	8.07211	3.2258	4.56166	3.20071	5.38776	5.87004	5.67779	5.48588	6.85763	5.17483	6.31622	6.42237	6.38126	4.31058
FBgn0039165	3.08377	2.92594	3.39429	1.19316	2.45644	1.63544	3.62341	3.61273	3.57379	4.58574	4.33302	4.3865	3.73426	3.66931	3.93136	3.95874	3.97024	4.08821	1.27168
FBgn0031318	3.45407	3.26364	4.00753	2.11288	3.12809	2.71789	4.36919	3.66975	4.34043	4.44879	4.32889	4.43491	3.92216	3.97023	4.15148	4.35833	4.21378	4.52604	4.07961
FBgn0031319	3.10219	2.96627	3.33601	2.63118	2.84329	3.05317	3.34637	3.0083	3.50562	3.81408	3.80327	3.75959	3.30749	3.25796	3.44994	3.73543	3.91815	3.91678	4.46968
FBgn0039161	2.36782	2.09748	2.6322	0	0.486998	0.5086	1.25497	1.22437	1.35792	4.24602	4.22274	3.78437	2.40386	2.67675	2.23272	5.72263	5.07635	5.2553	0.251012
FBgn0039160	4.23919	4.10021	4.17866	2.61601	3.58619	3.32391	4.0082	4.115	4.04028	4.14325	4.36923	4.08978	4.2041	4.08706	4.29629	4.23833	4.50087	4.51253	5.14211
FBgn0039163	5.26596	5.88715	4.8586	6.7778	6.52095	6.42811	4.57616	5.12843	4.35294	4.49162	4.89075	4.46094	4.69022	4.91681	4.45546	4.84219	5.067	4.8437	6.6995
FBgn0031312	4.60624	5.14468	4.31575	5.55136	5.59285	5.25467	4.23592	4.57229	4.17908	4.64971	5.0597	4.46968	4.33778	4.64891	4.23023	4.62396	4.95326	4.62471	5.87357
FBgn0031313	4.73471	4.90481	5.18243	8.90072	8.75232	9.44449	6.14777	6.31423	6.27681	5.35905	5.72782	5.82117	9.00535	8.82796	9.1921	4.96956	4.7234	5.24364	5.13764
FBgn0031310	3.70465	3.90226	3.73184	3.11591	3.28027	3.03636	3.98679	4.05289	3.95737	3.80787	3.88537	3.70679	4.07913	4.2219	4.09621	3.76693	4.00615	3.87863	4.2222
FBgn0039169	1.9385	1.79533	2.18057	1.20628	2.65116	0.998963	2.52475	1.94973	2.39443	3.26717	2.57025	3.07652	2.24185	2.38154	2.31824	3.24207	2.58818	2.64917	2.87495
FBgn0031317	3.24189	3.45785	3.19924	3.55618	3.09357	3.58693	3.73888	3.67729	3.54104	3.99247	3.9193	3.79453	3.51775	3.40972	3.36262	3.91125	3.67523	3.77397	3.64639
FBgn0031314	2.69133	2.91749	2.57892	3.0138	2.98934	3.112	2.34042	2.59506	2.60946	2.53651	2.76737	2.47803	2.72755	2.66857	2.57692	2.70954	2.9454	2.64272	5.16861
FBgn0031315	3.17321	3.02747	3.23035	2.38435	2.45959	2.36743	3.43433	3.22786	3.16007	3.477	3.33466	2.93042	3.19397	3.21665	3.05595	2.82678	3.08379	2.89014	2.25647
FBgn0031060	2.62703	2.88919	2.64237	3.74112	3.59289	3.79806	2.13239	2.27612	2.50525	2.16718	2.3532	2.42784	2.32981	2.33101	2.32083	2.58056	2.46576	2.6496	4.56729
FBgn0031062	2.28903	3.53037	2.5007	2.83443	3.05715	3.52833	2.45203	3.63758	2.69837	3.01302	3.31591	3.05006	2.48375	3.28184	2.62309	3.36067	3.25604	3.15465	5.1589
FBgn0040734	2.33491	2.82143	1.15824	8.27253	7.92777	6.74632	1.52884	2.21662	0.96159	3.24795	3.12701	1.94508	2.40812	2.76483	1.57148	2.47894	2.34532	1.73265	0.651938
FBgn0000382	5.78717	4.82848	6.11455	3.20332	4.55269	4.01404	7.99596	6.37458	7.30862	6.92015	6.15552	6.69122	5.60485	5.05412	5.8719	5.48759	5.02102	5.05439	4.53078
FBgn0000384	3.60744	3.35312	3.55428	3.30071	3.3123	2.64335	4.18304	3.83205	4.02098	3.82585	3.57494	3.76765	3.79561	3.40982	3.65444	3.82781	3.36116	3.19827	2.8911
FBgn0038268	2.35243	2.49636	2.22019	1.71042	2.22761	2.2367	2.27487	2.24977	2.47469	1.84305	1.65718	1.84771	1.99894	2.11671	1.96611	2.70046	2.68856	2.86672	3.61361
FBgn0011202	5.72189	5.89513	5.99145	2.11288	2.6259	2.30442	5.36156	5.14138	5.39365	6.49877	6.27534	6.83809	4.76188	4.97821	4.80425	4.88889	4.90336	5.28511	4.52311
FBgn0030049	2.20763	2.18083	2.6701	4.71106	4.24002	4.44871	3.77769	2.63821	3.53501	3.35953	2.92194	3.00156	3.22661	2.66264	2.93459	2.83495	2.56414	2.31469	4.93328
FBgn0016926	6.13971	5.78444	5.68295	5.20229	6.74332	5.20806	5.38835	5.01524	5.17835	5.75941	5.48734	5.56141	6.42569	6.08539	6.71534	5.77521	5.5278	5.56655	4.88006
FBgn0011207	3.61308	4.136	3.63993	4.3332	4.82128	4.70458	3.7061	4.12565	3.7641	4.58764	4.46449	4.57633	3.84218	4.05565	3.8681	4.54886	4.52611	4.703	4.88833
FBgn0011204	4.01855	4.05941	4.27087	6.40596	7.29724	7.03731	4.09116	4.01681	4.49911	5.01761	5.05695	5.07472	4.44998	4.38311	4.51913	5.03987	4.92831	5.45635	6.82286
FBgn0011205	4.9555	5.53704	4.86432	6.49739	7.49592	7.10503	5.22343	5.2778	5.38187	7.07402	7.11524	6.8566	5.13704	5.42389	5.24592	5.62095	5.61309	5.75032	5.3638
FBgn0283521	6.29659	5.80375	6.47244	4.40225	4.8448	4.60603	7.01151	6.02397	6.75157	6.67867	6.04672	6.43702	6.65221	6.48489	6.77392	6.68442	6.56561	6.61145	7.96285
FBgn0031925	3.86382	3.11324	4.58751	0	0	0	0.209279	0.26263	1.33372	0.266084	0.214614	0.487847	0.366515	0.239522	0.826122	0.0310931	0.131908	0.0829229	0.586995
FBgn0283525	2.54546	2.9934	2.55197	3.6807	3.50886	3.53502	2.14663	2.59246	2.30939	2.03628	2.17674	2.04921	2.12676	2.391	2.30089	2.19364	2.17265	2.28185	3.76223
FBgn0038260	0.552045	0.557053	0.765186	0	0	0	2.77086	2.60035	2.87437	0.424039	0.381932	0.326563	2.34393	2.2568	2.60789	0.415532	0.197549	0.298055	0.239642
FBgn0250869	6.29827	5.53574	6.20985	2.01629	1.46139	1.56213	6.31877	5.32052	5.64581	7.09884	6.03875	6.50372	5.82783	5.45367	6.08649	5.61488	5.23946	5.05763	3.99738
FBgn0038692	2.52575	2.71017	2.55501	2.42405	2.2558	2.17484	2.34345	2.34513	2.67991	2.56513	2.51367	2.35627	2.61046	2.57984	2.37954	2.68463	2.73253	2.63219	4.14147
FBgn0085377	2.18804	1.75161	2.38842	1.07781	1.46102	1.58111	3.6821	3.01859	3.9589	2.4038	2.0867	2.56315	2.34166	2.32414	2.41377	3.38206	3.28318	3.61205	2.95705
FBgn0085376	0.650432	0.318051	0.574182	0.247878	0.077484	0.0760569	4.04683	2.64553	3.5023	0.664336	0.523703	0.466264	0.851062	0.871255	0.911185	2.31671	2.44604	2.56921	1.22445
FBgn0036239	4.68839	4.43789	4.89227	2.57963	3.61793	3.37504	5.25731	4.71259	5.30862	4.79048	4.59476	4.81088	4.95409	4.83514	5.04642	4.73588	4.70032	4.69792	5.37479
FBgn0085370	6.00895	5.1591	6.23592	2.37663	2.54769	1.91634	5.48771	4.2848	5.29356	5.86883	4.8733	5.40008	5.83408	5.85309	6.41805	4.90217	4.63001	4.29749	3.24968
FBgn0033316	2.94797	3.2006	2.97348	3.21917	3.23372	3.10268	2.90941	2.99056	3.21967	3.14649	3.08296	2.97065	2.98048	3.02958	2.75987	3.26062	3.50837	3.432	6.2354
FBgn0036237	5.41016	6.20419	4.82722	3.6602	3.91255	3.79198	4.63799	5.54006	4.23751	3.97962	4.60169	3.79211	4.86349	5.40797	4.46061	4.50781	4.77947	4.45368	5.62781
FBgn0033313	5.40067	4.85584	5.72385	3.49182	3.62604	3.82971	6.14819	5.16163	6.02842	6.30562	5.88788	6.15182	5.76369	5.70878	6.03882	6.23108	6.11713	6.39866	5.214
FBgn0015271	1.24251	1.67656	1.23286	0.230865	1.10305	0.757789	1.35005	1.26936	1.79967	1.26934	1.79203	1.32807	1.9388	1.62316	1.42848	1.25293	1.85524	1.412	4.33915
FBgn0034858	4.17542	4.58437	4.31119	4.88658	5.26932	4.92506	4.19391	4.36783	4.3433	5.75605	5.89912	5.58513	4.44164	4.5581	4.53927	5.48471	5.51494	5.71905	6.59476
FBgn0034859	2.58418	2.66617	2.33192	1.52095	1.86177	2.03624	1.56055	1.6246	1.86768	2.52895	2.46001	2.51801	2.05913	2.04506	2.01021	2.92764	2.75638	3.11274	4.10038
FBgn0034500	1.86387	2.0596	1.86642	4.80662	5.84426	6.06882	1.31558	2.0369	1.77193	6.17354	6.47359	6.79393	1.89618	2.38343	2.3763	2.21836	2.40573	2.75748	3.7953
FBgn0034501	7.7104	8.08769	7.70715	9.35868	9.41727	9.8836	7.52519	8.07404	7.39266	7.98419	7.8168	8.82992	7.21255	7.16037	7.70402	8.331	7.60735	9.23529	5.96369
FBgn0034503	4.07022	4.25085	3.87371	3.5751	3.48206	4.22708	3.55145	3.97689	3.55866	3.07994	3.35065	2.97959	3.80213	3.78717	3.58096	3.50112	3.51964	3.39625	4.77375
FBgn0034504	3.99599	3.75266	4.40235	2.78731	3.68851	3.35579	4.70621	4.28109	4.76883	4.99451	4.92368	4.87781	4.15639	4.30803	4.34238	5.08723	4.79348	5.12808	4.31041
FBgn0038348	0.861607	0.982566	0.932227	0.740806	0.803423	0.759025	0.553429	0.227707	0.608639	0.396719	0.471975	0.446533	1.47554	1.75668	2.17508	1.26544	0.697216	1.29725	0.491492
FBgn0038349	6.06483	5.92337	6.59487	5.88327	6.259	5.60321	6.0624	5.43836	6.27553	6.047	6.03337	6.18363	6.05717	6.12565	6.44791	7.03115	6.26325	7.1165	3.69634
FBgn0038344	2.27127	2.21372	2.49634	1.25888	2.27693	1.16258	2.96807	2.39296	2.96865	3.8232	3.5906	3.60793	2.76538	2.84802	2.98171	3.57469	3.68792	3.44565	3.44644
FBgn0002921	8.769	8.30397	9.2027	4.58127	5.75405	5.75927	11.4079	10.0171	11.2507	7.81447	7.41908	7.80612	8.64785	8.86845	8.92745	7.81994	7.9906	7.94275	7.46152
FBgn0030314	2.95224	3.03481	2.88878	2.9854	3.02441	2.91002	2.67648	2.41664	3.01253	3.16988	3.28096	3.09994	2.90671	2.67042	2.78433	3.4077	3.53262	3.47682	5.89449
FBgn0047000	0.90256	0.853659	0.62809	0	0	0	1.07159	1.56041	1.24625	0.106122	0.10323	0	1.99989	2.2382	1.58378	0.0144614	0	0	0.102265
FBgn0019990	3.11034	2.45034	3.47852	0.931523	2.35755	1.37393	3.68239	2.84982	3.99978	3.33931	3.03478	3.42664	3.07683	2.87091	3.31165	3.56826	3.11044	3.30514	4.1011
FBgn0052226	2.33013	2.40256	2.48319	1.79946	2.0659	2.01713	2.49767	2.19272	2.63363	3.59651	3.55472	3.4179	2.53777	2.82905	2.64573	3.49207	3.72873	3.6009	4.25337
FBgn0052221	3.50083	3.73754	3.54977	3.46485	3.63649	3.55759	3.17321	3.19333	3.16784	3.53768	3.63247	3.44011	3.08028	3.24183	3.18853	3.48772	3.52467	3.51386	2.78307
FBgn0040582	3.99052	5.20841	3.40433	10.1853	10.131	9.40538	3.71369	5.20604	3.42694	4.80614	5.96434	4.71278	4.80408	5.60293	4.38948	4.52695	4.87833	4.29975	2.70436
FBgn0015781	3.98397	3.88021	3.67413	6.41958	5.5676	6.04588	3.76603	3.82095	3.46579	3.45155	3.85356	3.40773	3.588	3.66588	3.48918	3.5636	3.86761	3.64517	4.53251
FBgn0010339	4.43728	5.35459	4.34109	5.33676	5.69656	5.45134	4.30757	5.09553	4.32614	4.75697	5.20296	4.70202	4.43747	4.84799	4.42663	5.16485	5.14311	5.14573	6.16418
FBgn0032810	3.07604	3.40398	2.48311	5.95556	5.93849	6.10301	5.3747	6.05666	3.89529	9.14738	9.21671	8.80532	3.93644	3.9315	3.81293	8.04053	7.62631	8.12664	1.46796
FBgn0015789	7.0997	7.13804	7.04646	6.58477	6.96948	7.50935	7.11753	6.94831	6.90875	6.33327	6.20762	6.26821	6.69546	6.74185	6.65097	6.71074	6.86395	6.86614	7.13122
FBgn0040588	5.50451	5.91582	4.77645	0.664867	0.598888	0.669515	0.664437	0.798019	1.20162	1.20084	0.946535	0.752015	1.22014	1.02483	1.06926	0.958703	0.863227	0.764879	0.331904
FBgn0010333	5.5147	5.23286	5.57704	3.86408	4.8379	4.91162	5.86718	5.67034	5.78121	5.59926	5.27381	5.73569	5.58179	5.66124	5.60714	5.24239	5.45976	5.61865	5.3084
FBgn0262114	4.7517	3.8983	4.94611	4.29545	5.04358	4.747	5.70376	4.56809	5.56053	5.78448	5.1725	5.65621	5.25014	4.91914	5.28235	5.78143	5.48025	5.57227	6.01791
FBgn0030993	2.85894	4.18203	2.10442	6.55709	6.25115	6.05321	3.90591	4.6212	3.10723	2.34512	3.29246	2.46021	5.49456	6.17088	5.51036	2.828	2.81157	2.47468	2.92022
FBgn0030991	5.16425	4.99007	5.19801	4.55209	4.99707	5.03432	5.38336	5.19699	5.28641	5.58135	5.21363	5.37108	5.14163	5.1705	5.20111	5.59904	5.5886	5.85702	6.52121
FBgn0030997	1.82672	1.69325	1.96529	0.175828	0.0946517	0.186717	3.68188	3.68983	3.68953	0.562328	0.748848	0.613881	1.74481	1.44592	1.32244	0.554214	0.607273	0.54196	0.389314
FBgn0051809	3.31564	4.88187	3.22005	0	0.47396	0	3.23501	4.7162	2.5313	0.222821	0.905451	0.416221	2.27336	3.26722	2.26589	1.67622	1.90622	1.42949	0.883174
FBgn0030995	1.82799	1.96003	1.63409	2.17186	2.16506	1.89384	1.89228	1.8399	1.88004	1.83886	2.10805	1.78001	1.64628	2.00727	1.74979	2.14783	2.17793	2.05784	1.96559
FBgn0030994	0.547606	0.589878	0.542089	0.382005	0.665095	0.607871	1.45399	1.62699	1.5343	0.436351	0.565386	0.422919	3.76633	3.82532	3.87407	0.551591	0.33118	0.249796	0.201708
FBgn0260987	5.47481	4.77202	5.52643	3.61462	4.07022	3.19358	5.89965	5.56055	5.69583	5.67374	5.19133	5.48787	5.42617	5.06575	5.40382	5.28365	4.98772	4.65016	3.17908
FBgn0260986	3.20446	2.60926	0.412114	2.67468	1.15091	4.36773	3.31619	1.29975	3.22986	2.96954	4.47643	4.28785	2.17413	4.65139	3.75478	3.80474	2.72579	3.54915	6.71571
FBgn0260985	1.72968	2.49553	1.58644	2.43895	2.92486	2.32535	2.01966	2.69147	2.67802	2.33029	2.47476	2.20926	2.72331	2.3945	2.0448	2.2933	2.21771	2.24916	5.41823
FBgn0004057	4.51	4.66913	4.4569	6.81655	6.3234	7.02882	4.3941	4.30847	4.54571	5.27199	5.53052	5.35553	3.97895	4.53742	4.34268	5.59737	6.06967	5.55324	4.1281
FBgn0032819	2.12958	3.20806	2.02793	2.66264	2.67223	2.83067	1.68416	2.75099	1.99535	1.89241	2.11758	1.94294	2.01343	2.55766	1.75028	2.44241	2.33025	2.36905	4.01392
FBgn0032042	2.68581	2.33412	2.572	2.0441	1.83837	1.15095	3.38178	2.85235	3.22002	3.43103	3.11582	3.20948	2.6217	2.53235	2.73985	3.49873	3.18065	2.80843	1.85169
FBgn0032047	1.76591	1.99162	1.51883	2.08638	2.05856	2.00518	1.29981	1.60849	1.4258	1.60617	1.95162	1.60823	1.70101	1.63657	1.43934	1.74426	2.02926	1.5989	3.85783
FBgn0041184	4.25578	5.63134	3.52362	2.68983	3.17917	2.25718	4.75324	5.61769	4.02503	3.95626	4.01319	3.80942	4.04087	4.73749	4.0258	4.66637	5.42559	4.47812	2.44977
FBgn0011573	4.3181	4.74202	4.34228	4.01914	4.17093	3.98305	4.44616	4.49927	4.47547	4.1841	4.28106	4.06663	4.63779	4.65885	4.60632	4.18438	4.23745	4.07919	4.8083
FBgn0010622	5.27906	5.35273	5.17374	3.04325	3.2167	3.59978	4.9668	5.0907	4.7793	4.14092	4.31924	3.95305	4.89176	5.14908	4.81419	3.72793	3.86826	3.70769	3.11549
FBgn0010621	7.22363	8.52171	6.62191	7.45439	7.52792	7.24438	6.43112	7.513	6.39478	5.74125	6.25531	5.8244	6.62956	7.37373	6.01164	6.61941	6.71243	6.51986	8.95163
FBgn0039904	4.12893	3.45483	4.23691	2.86127	3.07991	2.5678	4.93901	4.28863	4.84938	4.99896	4.2597	4.72658	4.41116	4.2337	4.63583	4.75857	4.16569	4.03238	3.11126
FBgn0039902	5.55932	5.42141	5.53209	4.83603	5.29957	5.19598	6.04804	5.98937	5.86876	6.59329	6.43769	6.47463	5.67408	5.60051	5.71139	6.5402	6.48085	6.56813	3.91812
FBgn0039900	1.71197	1.19452	1.59218	0.637301	0.503332	0.988806	0.524958	0.267624	0.581267	1.01241	0.781489	1.19093	1.30649	0.980284	1.52376	0.385285	0.389349	0.114994	0.254444
FBgn0053095	2.72673	1.95854	2.30482	2.46156	2.2538	1.96382	2.48068	2.15666	3.36858	3.98524	3.41648	3.87206	2.30373	3.02588	3.65985	3.57085	3.25873	2.44995	2.78455
FBgn0053094	6.17848	6.16001	6.39978	4.48553	4.71789	4.34729	6.97006	6.78759	6.97473	6.41381	6.16436	6.60149	5.59773	5.72087	5.76383	6.15611	6.04688	6.28273	5.42509
FBgn0039908	5.50688	4.69743	5.1261	3.83952	3.52868	3.52593	4.99673	4.19942	4.49789	3.8951	3.50548	3.47597	4.66859	4.15634	4.45177	3.64027	3.50269	3.31722	2.95336
FBgn0086778	0.737892	0.825274	0.980105	0	0	0.0749816	0.096617	0.144401	0.254789	0	0.241188	0.0978796	2.57646	2.50657	2.23778	0.249492	0.16392	0.0729951	0.10494
FBgn0086779	4.07187	3.85165	4.05096	2.17255	3.01197	2.21949	4.61465	4.22656	4.50656	5.64401	5.46051	5.68417	4.44841	4.2842	4.4806	4.71277	4.19609	4.41166	4.23847
FBgn0002542	1.70322	1.70066	1.97841	0.643742	1.06321	0.801383	3.75328	3.55457	4.21414	1.76813	1.88088	1.52609	3.17611	2.75076	2.95791	2.72052	3.02477	3.27667	7.19938
[truncated: 6,338 more rows]

## Sheet: Summary of Analysis
FBgn	gene_symbol	chrom	signal	ML.omega	tau	tissuemax	BURU	OVDU	SRU	STU	POU	FBU	WF	FRT.WF	Enrich	BUR.enrich	OVD.enrich	SR.enrich	ST.enrich	PO.enrich	FB.enrich	SFP	BUR.6	BUR.24	BUR.post	OVD.6	OVD.24	OVD.post	SR.6	SR.24	SR.post	ST.6	ST.24	ST.post	PO.6	PO.24	PO.post	FB.6	FB.24	FB.post	FRT.up6	FRT.up24	FRT.down6	FRT.down24
FBgn0014931	CG2678	3	No Signal	0.3493	0.631206	NotSpec	0.700616	1.34728	1.35562	0.772661	0.989928	2.08695	2.29833	Not	NA	NA	NA	NA	NA	NA	NA	NA	NA	NA	NA	NA	NA	NA	NA	NA	NA	NA	NA	NA	NA	NA	NA	NA	NA	NA	0	0	0	0
FBgn0014930	CG2846	3	No Signal	0.0638	0.546829	NotSpec	4.63574	4.57491	4.6574	5.36616	5.03817	5.89962	4.13502	Not	NA	NA	NA	NA	NA	NA	NA	NA	NA	NA	NA	NA	NA	NA	NA	NA	NA	NA	NA	NA	NA	NA	NA	NA	NA	NA	0	0	0	0
FBgn0027562	CG10345	3	No Signal	0.0747	0.823714	NotSpec	2.45451	0.276158	0.0694971	0.0254119	0	0	2.45935	Not	NA	NA	NA	NA	NA	NA	NA	NA	NA	Up	Persist Up	NA	NA	NA	NA	NA	NA	NA	NA	NA	NA	NA	NA	NA	NA	NA	0	1	0	0
FBgn0027563	CG9631	3	Signal	0.2494	0.960167	FB	2.51454	1.52454	2.38242	2.32087	2.38413	6.60736	2.33402	Not	NA	NA	NA	NA	NA	NA	FB	NA	NA	NA	NA	NA	NA	NA	NA	NA	NA	NA	NA	NA	NA	NA	NA	NA	NA	NA	0	0	0	0
FBgn0027560	Tps1	2	No Signal	0.004	0.950901	FB	7.09949	7.72924	8.55603	8.81518	9.20299	12.6705	7.32846	Not	NA	NA	NA	NA	NA	NA	FB	NA	NA	NA	NA	NA	NA	NA	NA	NA	NA	NA	NA	NA	NA	NA	NA	NA	NA	NA	0	0	0	0
FBgn0027561	CG18659	2	No Signal	0.059	0.383793	NotSpec	4.89028	5.18213	5.03276	4.94332	5.08131	4.04799	5.5857	Not	NA	NA	NA	NA	NA	NA	NA	NA	NA	NA	NA	NA	NA	NA	NA	NA	NA	NA	NA	NA	NA	NA	NA	NA	NA	NA	0	0	0	0
FBgn0027567	CG8108	3	No Signal	0.0944	0.794004	NotSpec	4.84706	5.2118	4.97205	5.46729	5.30515	4.96045	7.39045	Not	NA	NA	NA	NA	NA	NA	NA	NA	NA	NA	NA	NA	NA	NA	NA	NA	NA	NA	NA	NA	NA	NA	NA	NA	NA	NA	0	0	0	0
FBgn0027564	CG3149	X	No Signal	0.0395	0.553529	NotSpec	4.53727	4.3817	4.3766	5.11322	4.45646	5.7733	4.82939	Not	NA	NA	NA	NA	NA	NA	NA	NA	Up	NA	Transient Up	NA	NA	NA	NA	NA	NA	NA	NA	NA	NA	NA	NA	NA	NA	NA	1	0	0	0
FBgn0027565	CG5498	3	No Signal	0.2409	0.257266	NotSpec	4.27158	4.46729	3.76176	4.36326	3.89668	3.68418	4.5135	Not	NA	NA	NA	NA	NA	NA	NA	NA	Down	NA	Transient Down	NA	NA	NA	NA	NA	NA	NA	NA	NA	NA	NA	NA	NA	NA	NA	0	0	1	0
FBgn0027568	Cand1	2	No Signal	0.0224	0.389859	NotSpec	4.49669	4.63725	4.73103	5.01045	5.00578	3.69639	5.34703	Not	NA	NA	NA	NA	NA	NA	NA	NA	NA	NA	NA	NA	NA	NA	NA	NA	NA	NA	NA	NA	NA	NA	NA	Up	NA	Transient Up	0	0	0	0
FBgn0027569	cert	3	No Signal	0.0027	0.346456	NotSpec	3.88463	3.90951	4.28011	4.85549	4.59946	4.21357	4.55933	Not	NA	NA	NA	NA	NA	NA	NA	NA	NA	NA	NA	NA	NA	NA	NA	NA	NA	NA	NA	NA	NA	NA	NA	NA	NA	NA	0	0	0	0
FBgn0010438	mtSSB	3	No Signal	0.0263	0.840983	NotSpec	3.26521	3.43166	3.47142	3.36477	3.17757	4.28076	6.09541	Not	NA	NA	NA	NA	NA	NA	NA	NA	Up	NA	Transient Up	NA	NA	NA	NA	NA	NA	NA	NA	NA	NA	NA	NA	NA	NA	NA	1	0	0	0
FBgn0037356	CG12170	3	No Signal	0.0745	0.830991	NotSpec	4.97822	4.43003	4.1588	3.54577	3.49641	6.81655	4.66586	Not	NA	NA	NA	NA	NA	NA	NA	NA	NA	NA	NA	NA	NA	NA	NA	NA	NA	NA	NA	NA	NA	NA	NA	NA	NA	NA	0	0	0	0
FBgn0262057	Spn77Ba	3	Signal	0.1355	0.608936	NotSpec	6.85287	6.04829	6.02866	5.00639	4.74703	7.05963	3.40833	Higher	Epithelial	BUR	OVD	SR	NA	NA	FB	NA	NA	NA	NA	NA	NA	NA	NA	NA	NA	NA	NA	NA	NA	NA	NA	NA	NA	NA	0	0	0	0
FBgn0030645	Alg14	X	No Signal	0.0944	0.251847	NotSpec	3.08805	2.85075	2.94993	3.30591	3.22598	3.43307	3.53352	Not	NA	NA	NA	NA	NA	NA	NA	NA	NA	NA	NA	NA	NA	NA	NA	NA	NA	NA	NA	NA	NA	NA	NA	NA	NA	NA	0	0	0	0
FBgn0085218	CG34189	2	Signal	0.3466	0.98909	PO	0.743717	0.992483	2.78295	1.11646	7.44035	1.84379	0	Higher	NA	NA	OVD	SR	NA	PO	NA	NA	NA	NA	NA	NA	NA	NA	NA	NA	NA	NA	NA	NA	NA	NA	NA	NA	NA	NA	0	0	0	0
FBgn0010435	emp	2	No Signal	NA	0.767839	NotSpec	6.3012	4.29797	5.42526	5.57366	7.44155	5.41921	3.89088	Higher	NA	BUR	NA	NA	NA	PO	NA	NA	NA	NA	NA	NA	NA	NA	NA	NA	NA	NA	NA	NA	NA	NA	NA	NA	NA	NA	0	0	0	0
FBgn0259482	Mob3	2	No Signal	0.0166	0.279364	NotSpec	5.00796	4.83757	4.53019	4.94258	4.66471	5.1	3.31872	Not	NA	NA	NA	NA	NA	NA	NA	NA	NA	NA	NA	NA	NA	NA	NA	NA	NA	NA	NA	NA	NA	NA	NA	Down	NA	Transient Down	0	0	0	0
FBgn0033579	CG13229	2	No Signal	0.0465	0.906523	BUR	1.68102	0.396184	0.287929	0.474784	0.343666	0	0.0593216	Higher	NA	BUR	NA	NA	NA	NA	NA	NA	Down	NA	Transient Down	NA	NA	NA	NA	NA	NA	NA	NA	NA	NA	NA	NA	NA	NA	NA	0	0	1	0
FBgn0085212	CG34183	2	No Signal	0.0822	0.209521	NotSpec	2.4161	2.13555	2.26564	2.05533	1.97317	2.18739	2.24208	Not	NA	NA	NA	NA	NA	NA	NA	NA	NA	NA	NA	NA	NA	NA	NA	NA	NA	NA	NA	NA	NA	NA	NA	NA	NA	NA	0	0	0	0
FBgn0033434	CG1902	2	No Signal	0.1318	0.320197	NotSpec	5.35338	5.18668	5.28899	4.78443	4.57168	4.87927	3.63016	Not	NA	NA	NA	NA	NA	NA	NA	NA	NA	NA	NA	NA	NA	NA	NA	NA	NA	NA	NA	NA	NA	NA	NA	NA	NA	NA	0	0	0	0
FBgn0036117	CG6321	3	No Signal	0.1362	0.463344	NotSpec	3.09205	3.27203	2.82246	2.18712	1.93952	3.69427	3.43432	Not	NA	NA	NA	NA	NA	NA	NA	NA	NA	NA	NA	NA	NA	NA	NA	NA	NA	NA	NA	NA	NA	NA	NA	NA	NA	NA	0	0	0	0
FBgn0036111	Aps	3	No Signal	0.0082	0.276898	NotSpec	5.59005	5.87894	5.92452	4.93595	5.76757	3.65652	5.91797	Not	NA	NA	NA	NA	NA	NA	NA	NA	NA	NA	NA	NA	NA	NA	NA	NA	NA	NA	NA	NA	NA	NA	NA	NA	NA	NA	0	0	0	0
FBgn0033439	CG1773	2	Signal	NA	0.962558	FB	0.361417	0.472663	0.856639	0.790227	1.33488	4.23791	0.355163	Not	NA	NA	NA	NA	NA	NA	FB	NA	NA	NA	NA	NA	NA	NA	NA	NA	NA	NA	NA	NA	NA	NA	NA	NA	NA	NA	0	0	0	0
FBgn0033438	Mmp2	2	Signal	0.2648	0.907205	SR	1.73335	1.78737	4.1606	0.466221	1.03247	0.553229	1.89893	Higher	NA	NA	NA	SR	NA	NA	NA	NA	NA	NA	NA	Up	NA	Transient Up	NA	NA	NA	NA	NA	NA	NA	NA	NA	NA	NA	NA	1	1	0	0
FBgn0032082	CG18088	2	No Signal	0.1937	0.968346	ST	0.186066	0.586144	0.889803	4.08341	1.06346	0	0.534025	Higher	NA	NA	NA	NA	ST	NA	NA	NA	NA	NA	NA	NA	NA	NA	NA	NA	NA	NA	NA	NA	NA	NA	NA	NA	NA	NA	0	0	0	0
FBgn0040752	Prosap	2	No Signal	0.0487	0.685549	NotSpec	4.95543	6.86778	5.38306	5.99514	5.8991	0.741525	4.73184	Higher	NA	NA	OVD	NA	NA	NA	NA	NA	NA	NA	NA	NA	NA	NA	NA	NA	NA	NA	NA	NA	NA	NA	NA	NA	NA	NA	0	0	0	0
FBgn0029174	Fkbp59	2	No Signal	0.0789	0.746998	NotSpec	5.43037	5.24581	5.41574	5.53175	5.33558	7.23007	7.87373	Not	NA	NA	NA	NA	NA	NA	NA	NA	Up	NA	Transient Up	NA	NA	NA	NA	NA	NA	NA	NA	NA	NA	NA	NA	NA	NA	NA	1	0	0	0
FBgn0040754	CG17059	2	No Signal	0.0309	0.452273	NotSpec	5.45277	4.94828	5.42315	4.79054	4.89012	5.7978	3.40998	Higher	NA	BUR	NA	SR	NA	NA	NA	NA	NA	NA	NA	NA	NA	NA	NA	NA	NA	NA	NA	NA	NA	NA	NA	NA	NA	NA	0	0	0	0
FBgn0010043	GstD7	3	No Signal	NA	0.839007	NotSpec	0.0645418	0.124732	0.182083	1.83286	2.36224	0.383252	0.897956	Not	NA	NA	NA	NA	NA	NA	NA	NA	NA	NA	NA	NA	NA	NA	NA	NA	NA	NA	NA	NA	NA	Up	Persist Up	NA	NA	NA	0	0	0	0
FBgn0036090	CG8009	3	No Signal	0.0808	0.609074	NotSpec	2.98456	3.29837	4.03574	2.89274	3.29764	1.52143	2.08452	Higher	NA	NA	NA	SR	NA	NA	NA	NA	NA	NA	NA	NA	NA	NA	NA	NA	NA	NA	NA	NA	NA	NA	NA	NA	NA	NA	0	0	0	0
FBgn0038244	CG7987	3	No Signal	0.1372	0.777003	NotSpec	4.71051	4.75568	4.57568	5.07897	4.77659	4.17308	6.82436	Not	NA	NA	NA	NA	NA	NA	NA	NA	NA	NA	NA	NA	NA	NA	NA	NA	NA	NA	NA	NA	NA	NA	NA	NA	NA	NA	0	0	0	0
FBgn0038243	CG8066	3	No Signal	NA	0.713673	NotSpec	7.08029	5.18963	6.2446	5.43138	5.48838	4.93318	2.54854	Higher	allFRT	BUR	OVD	SR	ST	PO	NA	NA	NA	NA	NA	NA	NA	NA	NA	NA	NA	NA	NA	NA	NA	Down	Persist Down	NA	NA	NA	0	0	0	0
FBgn0029170	TwdlT	3	Signal	0.1988	0.927168	BUR	3.5301	1.14863	1.75989	0.346777	0.597824	0.0760569	0.224303	Higher	NA	BUR	NA	SR	NA	NA	NA	NA	NA	NA	NA	NA	NA	NA	NA	NA	NA	NA	NA	NA	NA	NA	NA	NA	NA	NA	0	0	0	0
FBgn0032864	CG2493	2	No Signal	0.0688	0.847022	NotSpec	5.78687	5.5118	6.30658	4.76117	5.0891	8.33631	5.92114	Not	NA	NA	NA	NA	NA	NA	NA	NA	NA	NA	NA	NA	NA	NA	NA	NA	NA	NA	NA	NA	NA	NA	NA	NA	NA	NA	0	0	0	0
FBgn0036094	CG14153	3	Signal	0.1628	0.549429	NotSpec	0.963078	1.49431	1.24766	0.31821	0.613598	1.40463	0.219758	Higher	NA	NA	OVD	NA	NA	NA	NA	NA	NA	NA	NA	NA	NA	NA	NA	NA	NA	NA	NA	NA	NA	NA	NA	NA	NA	NA	0	0	0	0
FBgn0036373	Tgi	3	No Signal	0.13	0.392987	NotSpec	4.25836	4.31828	4.04679	4.69495	4.82412	3.51318	5.02888	Not	NA	NA	NA	NA	NA	NA	NA	NA	NA	NA	NA	NA	NA	NA	NA	NA	NA	NA	NA	NA	NA	NA	NA	NA	NA	NA	0	0	0	0
FBgn0036374	Spt20	3	No Signal	0.0562	0.666109	NotSpec	2.46747	3.12688	2.65506	3.05362	3.35626	1.0519	4.21425	Not	NA	NA	NA	NA	NA	NA	NA	NA	NA	NA	NA	NA	NA	NA	NA	NA	NA	NA	NA	NA	NA	NA	NA	NA	NA	NA	0	0	0	0
FBgn0036377	CG10710	3	No Signal	0.0744	0.827019	NotSpec	3.06647	1.96681	2.23358	0.43433	0.527179	0.122888	0.21833	Higher	Epithelial	BUR	OVD	SR	NA	NA	NA	NA	Up	NA	Transient Up	NA	NA	NA	Up	NA	Transient Up	NA	NA	NA	NA	NA	NA	NA	NA	NA	2	0	0	0
FBgn0036376	Liprin-beta	3	No Signal	0.0365	0.290659	NotSpec	4.90919	5.08016	4.90195	4.8049	4.89317	2.74896	4.41837	Not	NA	NA	NA	NA	NA	NA	NA	NA	NA	NA	NA	NA	NA	NA	NA	NA	NA	NA	NA	NA	NA	NA	NA	Up	NA	Transient Up	0	0	0	0
FBgn0051908	CG31908	2	No Signal	0.2368	0.234313	NotSpec	5.1874	5.36403	5.11685	5.50967	5.17073	5.17791	5.6375	Not	NA	NA	NA	NA	NA	NA	NA	NA	NA	NA	NA	NA	NA	NA	NA	NA	NA	NA	NA	NA	NA	NA	NA	NA	NA	NA	0	0	0	0
FBgn0051729	CG31729	2	No Signal	0.0201	0.565206	NotSpec	6.91783	6.81395	6.94583	7.84749	7.19119	5.56263	5.75836	Higher	NA	NA	NA	NA	ST	NA	NA	NA	Down	NA	Transient Down	NA	NA	NA	NA	NA	NA	NA	NA	NA	NA	NA	NA	NA	NA	NA	0	0	1	0
FBgn0005617	msl-1	2	No Signal	0.3538	0.61305	NotSpec	2.70349	3.2552	2.7868	2.47498	3.06379	1.24966	3.93796	Not	NA	NA	NA	NA	NA	NA	NA	NA	NA	NA	NA	NA	NA	NA	NA	NA	NA	NA	NA	NA	NA	NA	NA	NA	NA	NA	0	0	0	0
FBgn0005612	Sox14	2	No Signal	0.2063	0.458722	NotSpec	3.10943	3.90658	3.57224	3.34699	4.10589	2.91352	2.44378	Not	NA	NA	NA	NA	NA	NA	NA	NA	NA	NA	NA	NA	NA	NA	NA	NA	NA	NA	NA	NA	NA	NA	NA	NA	NA	NA	0	0	0	0
FBgn0025809	Paf-AHalpha	X	No Signal	0.0373	0.367457	NotSpec	3.53711	3.75868	3.43618	3.1163	3.54967	1.42253	3.01449	Not	NA	NA	NA	NA	NA	NA	NA	NA	NA	NA	NA	NA	NA	NA	NA	NA	NA	NA	NA	NA	NA	NA	NA	NA	NA	NA	0	0	0	0
FBgn0027338	Kap-alpha3	3	No Signal	0.0725	0.205811	NotSpec	7.14128	7.22644	7.05521	7.57753	7.25384	7.60866	7.35526	Not	NA	NA	NA	NA	NA	NA	NA	NA	NA	NA	NA	NA	NA	NA	NA	NA	NA	NA	NA	NA	NA	NA	NA	NA	NA	NA	0	0	0	0
FBgn0039419	CG12290	3	No Signal	0.0321	0.625726	NotSpec	2.80513	2.62485	1.29713	0.95741	2.47689	0.640885	0.812261	Higher	NA	BUR	OVD	NA	NA	PO	NA	NA	NA	NA	NA	NA	NA	NA	NA	NA	NA	NA	NA	NA	NA	NA	NA	NA	NA	NA	0	0	0	0
FBgn0262353	lncRNA:CR43051	2	No Signal	NA	0.918471	FB	4.19878	3.27769	3.62712	2.52478	3.60429	6.8086	1.00827	Higher	NA	BUR	OVD	SR	NA	PO	FB	NA	NA	NA	NA	NA	NA	NA	NA	NA	NA	NA	NA	NA	NA	NA	NA	Down	NA	Transient Down	0	0	0	0
FBgn0260933	rempA	2	No Signal	0.031	0.583324	NotSpec	1.95936	1.05122	1.43842	1.40376	0.961243	0	1.50943	Not	NA	NA	NA	NA	NA	NA	NA	NA	NA	NA	NA	NA	NA	NA	NA	NA	NA	NA	NA	NA	NA	NA	NA	NA	NA	NA	0	0	0	0
FBgn0035876	Pex2	3	No Signal	0.084	0.537755	NotSpec	2.18699	2.18253	2.50377	2.85511	3.05285	3.6166	2.79644	Not	NA	NA	NA	NA	NA	NA	NA	NA	NA	NA	NA	NA	NA	NA	NA	NA	NA	NA	NA	NA	NA	NA	NA	NA	NA	NA	0	0	0	0
FBgn0035875	Cpr66Cb	3	Signal	0.0009	0.975497	ST	1.08708	0.445389	0.702657	5.12668	1.95447	0	0	Higher	NA	NA	NA	NA	ST	NA	NA	NA	NA	NA	NA	NA	NA	NA	NA	NA	NA	Down	NA	Transient Down	NA	NA	NA	NA	NA	NA	0	0	1	0
FBgn0035872	Cpsf6	3	No Signal	0.0379	0.86802	NotSpec	4.13178	4.38075	4.29737	5.02851	4.56922	4.52728	7.38381	Not	NA	NA	NA	NA	NA	NA	NA	NA	NA	NA	NA	NA	NA	NA	NA	NA	NA	NA	NA	NA	NA	NA	NA	NA	NA	NA	0	0	0	0
FBgn0035871	BI-1	3	No Signal	0.0446	0.530671	NotSpec	7.36518	6.98246	7.47342	7.59117	7.85685	8.43618	6.4073	Not	NA	NA	NA	NA	NA	NA	NA	NA	NA	NA	NA	NA	NA	NA	NA	NA	NA	NA	NA	NA	NA	NA	NA	NA	NA	NA	0	0	0	0
FBgn0028646	aralar1	3	No Signal	NA	0.804659	NotSpec	5.72891	6.07742	6.81895	6.61377	6.41229	8.69605	6.21611	Not	NA	NA	NA	NA	NA	NA	NA	NA	NA	NA	NA	NA	NA	NA	NA	NA	NA	NA	NA	NA	NA	NA	NA	NA	NA	NA	0	0	0	0
FBgn0028648	mRpL50	3	No Signal	0.0966	0.386841	NotSpec	3.7734	3.75977	3.58911	3.23931	3.23685	4.05746	4.29971	Not	NA	NA	NA	NA	NA	NA	NA	NA	NA	NA	NA	NA	NA	NA	NA	NA	NA	NA	NA	NA	NA	NA	NA	NA	NA	NA	0	0	0	0
FBgn0025549	unc-119	X	No Signal	0.1822	0.414465	NotSpec	3.12043	3.47815	3.59144	3.23536	4.1244	2.6008	4.03406	Not	NA	NA	NA	NA	NA	NA	NA	NA	NA	NA	NA	NA	NA	NA	NA	NA	NA	NA	NA	NA	NA	NA	NA	NA	NA	NA	0	0	0	0
FBgn0032478	CG5458	2	No Signal	0.0782	0.676234	NotSpec	1.39246	1.62256	1.41269	2.353	1.58721	0.623478	0.0973174	Higher	NA	NA	NA	SR	ST	PO	NA	NA	NA	NA	NA	NA	NA	NA	NA	NA	NA	NA	NA	NA	NA	NA	NA	NA	NA	NA	0	0	0	0
FBgn0032479	CG16974	2	Signal	0.1186	0.483695	NotSpec	5.77266	5.34618	4.75749	5.85009	5.6691	4.88528	6.37781	Not	NA	NA	NA	NA	NA	NA	NA	NA	Down	NA	Transient Down	NA	NA	NA	NA	NA	NA	NA	NA	NA	NA	NA	NA	NA	NA	NA	0	0	1	0
FBgn0032477	CG5287	2	No Signal	0.0423	0.690841	NotSpec	3.05407	3.43813	3.54321	4.93255	5.2758	3.24035	2.38338	Higher	Gland	NA	NA	NA	ST	PO	NA	NA	NA	NA	NA	NA	NA	NA	NA	NA	NA	NA	NA	NA	NA	NA	NA	Up	NA	Transient Up	0	0	0	0
FBgn0032474	DnaJ-H	2	No Signal	NA	0.372085	NotSpec	5.45974	5.18713	5.07755	4.60455	4.64776	3.87306	5.07854	Not	NA	NA	NA	NA	NA	NA	NA	NA	NA	NA	NA	NA	NA	NA	NA	NA	NA	NA	NA	NA	NA	NA	NA	NA	NA	NA	0	0	0	0
FBgn0032475	Sfmbt	2	No Signal	0.0448	0.708377	NotSpec	3.70085	4.02507	3.71559	4.50879	4.31595	2.85506	5.65376	Not	NA	NA	NA	NA	NA	NA	NA	NA	NA	NA	NA	NA	NA	NA	NA	NA	NA	NA	NA	NA	NA	NA	NA	NA	NA	NA	0	0	0	0
FBgn0039350	jigr1	3	No Signal	0.1899	0.870743	NotSpec	4.1974	4.55851	4.2367	4.42306	3.95574	2.53773	6.98605	Not	NA	NA	NA	NA	NA	NA	NA	NA	Down	NA	Transient Down	NA	NA	NA	NA	NA	NA	NA	NA	NA	NA	NA	NA	NA	NA	NA	0	0	1	0
FBgn0086898	dgo	2	No Signal	0.0787	0.495097	NotSpec	2.91734	1.83261	2.63307	1.8846	2.19147	0.300953	2.72223	Not	NA	NA	NA	NA	NA	NA	NA	NA	NA	NA	NA	NA	NA	NA	NA	NA	NA	NA	NA	NA	NA	NA	NA	NA	NA	NA	0	0	0	0
FBgn0086895	pea	2	No Signal	0.0466	0.774945	NotSpec	2.35527	2.63018	2.44422	2.34429	2.37748	1.13355	4.18545	Not	NA	NA	NA	NA	NA	NA	NA	NA	NA	NA	NA	NA	NA	NA	NA	NA	NA	NA	NA	NA	NA	NA	NA	NA	NA	NA	0	0	0	0
FBgn0003048	pcx	X	No Signal	0.0996	0.382422	NotSpec	2.83687	3.73265	3.44671	2.9153	3.55122	1.64694	3.4734	Not	NA	NA	NA	NA	NA	NA	NA	NA	NA	NA	NA	NA	NA	NA	NA	NA	NA	NA	NA	NA	NA	NA	NA	NA	NA	NA	0	0	0	0
FBgn0003511	Sry-beta	3	No Signal	0.0211	0.862706	NotSpec	2.6569	2.62313	2.34655	2.59205	2.13879	2.38356	5.08856	Not	NA	NA	NA	NA	NA	NA	NA	NA	Up	NA	Transient Up	NA	NA	NA	NA	NA	NA	NA	NA	NA	NA	NA	NA	NA	NA	NA	1	0	0	0
FBgn0003510	Sry-alpha	3	No Signal	0.0837	0.31245	NotSpec	1.28089	1.18948	1.24987	1.85508	1.50533	1.81309	1.74729	Not	NA	NA	NA	NA	NA	NA	NA	NA	NA	NA	NA	NA	NA	NA	NA	NA	NA	NA	NA	NA	NA	NA	NA	NA	NA	NA	0	0	0	0
FBgn0003512	Sry-delta	3	No Signal	0.037	0.586983	NotSpec	4.07697	3.89356	3.64572	4.26104	3.81225	5.26277	5.50258	Not	NA	NA	NA	NA	NA	NA	NA	NA	Up	NA	Transient Up	NA	NA	NA	NA	NA	NA	NA	NA	NA	NA	NA	NA	NA	NA	NA	1	0	0	0
FBgn0003514	sqh	X	No Signal	0.0011	0.456602	NotSpec	7.13269	6.83309	7.03793	7.65761	7.50982	5.28543	5.75621	Higher	NA	NA	NA	NA	ST	NA	NA	NA	Up	NA	Transient Up	NA	NA	NA	Up	NA	Transient Up	NA	NA	NA	NA	NA	NA	NA	NA	NA	2	0	0	0
FBgn0003041	pbl	3	No Signal	0.0579	0.869546	NotSpec	3.78825	2.88907	3.89046	1.42441	1.10323	0.209311	5.55604	Not	NA	NA	NA	NA	NA	NA	NA	NA	Up	Up	Persist Up	NA	NA	NA	NA	NA	NA	NA	NA	NA	NA	NA	NA	NA	NA	NA	1	1	0	0
FBgn0042627	FASN2	2	No Signal	0.0473	0.8492	NotSpec	1.00663	1.40345	2.07193	2.04762	2.52652	5.77382	5.16369	Not	NA	NA	NA	NA	NA	NA	NA	NA	NA	NA	NA	NA	NA	NA	NA	NA	NA	NA	NA	NA	NA	NA	NA	Down	NA	Transient Down	0	0	0	0
FBgn0053460	CG33460	2	Signal	0.5183	0.899707	NotSpec	0.876088	1.15032	3.83819	0.987946	1.57108	4.99497	0.351012	Higher	NA	NA	NA	SR	NA	NA	FB	NA	NA	NA	NA	NA	NA	NA	NA	NA	NA	NA	NA	NA	NA	NA	NA	Down	NA	Transient Down	0	0	0	0
FBgn0035293	CG5687	3	Signal	0.0482	0.907001	OVD	9.81198	10.8622	6.65269	3.62987	4.43309	2.16351	2.62233	Higher	NA	BUR	OVD	SR	NA	PO	NA	NA	Down	NA	Transient Down	Down	NA	Transient Down	Down	NA	Transient Down	Down	NA	Transient Down	NA	NA	NA	NA	NA	NA	0	0	4	1
FBgn0035290	dsb	3	No Signal	0.0584	0.934428	BUR	3.2448	0.576759	0.536519	0.226848	0.269325	0.194534	1.52319	Higher	NA	BUR	NA	NA	NA	NA	NA	NA	NA	NA	NA	NA	NA	NA	NA	NA	NA	NA	NA	NA	NA	NA	NA	NA	NA	NA	0	0	0	0
FBgn0053468	CG33468	2	No Signal	0.1686	0.734297	NotSpec	4.04687	2.38215	3.5934	2.286	1.5029	2.22195	0.131717	Higher	NA	BUR	OVD	SR	ST	NA	FB	NA	Up	NA	Transient Up	Up	Up	Persist Up	Up	NA	Transient Up	NA	NA	NA	NA	NA	NA	NA	NA	NA	3	1	0	0
FBgn0053469	CG33469	2	No Signal	0.256	0.598908	NotSpec	2.05587	0.374785	1.91381	1.02116	1.63318	2.29466	0.0659886	Higher	NA	BUR	NA	SR	NA	NA	FB	NA	Up	NA	Transient Up	NA	NA	NA	NA	NA	NA	NA	NA	NA	NA	NA	NA	NA	NA	NA	1	0	0	0
FBgn0035294	Mfap1	3	No Signal	0.0339	0.487625	NotSpec	3.30221	3.0989	3.2447	3.29756	3.17918	2.64482	4.02735	Not	NA	NA	NA	NA	NA	NA	NA	NA	NA	NA	NA	NA	NA	NA	NA	NA	NA	NA	NA	NA	NA	NA	NA	NA	NA	NA	0	0	0	0
FBgn0263087	CG43355	2	No Signal	NA	0.973475	FB	0	0.593512	0.309206	0	1.04709	3.77607	0.271215	Not	NA	NA	NA	NA	NA	NA	FB	NA	NA	NA	NA	NA	NA	NA	NA	NA	NA	NA	NA	NA	NA	NA	NA	NA	NA	NA	0	0	0	0
FBgn0263083	CG43351	2	Signal	0.1515	0.986248	FB	2.98786	3.13463	4.17552	3.95995	4.40635	9.75358	2.48298	Not	NA	NA	NA	NA	NA	NA	FB	NA	NA	NA	NA	NA	NA	NA	NA	NA	NA	NA	NA	NA	NA	NA	NA	NA	NA	NA	0	0	0	0
FBgn0035204	CG2277	3	No Signal	0.1193	0.479139	NotSpec	4.62347	3.63997	4.36408	3.23846	2.97621	5.0212	4.87503	Not	NA	NA	NA	NA	NA	NA	NA	NA	NA	NA	NA	NA	NA	NA	NA	NA	NA	NA	NA	NA	NA	NA	NA	NA	NA	NA	0	0	0	0
FBgn0052594	be	X	Signal	0.2959	0.72518	NotSpec	3.79365	4.15378	5.06611	2.81492	4.01178	0.534432	1.72561	Higher	NA	BUR	OVD	SR	NA	PO	NA	NA	Down	NA	Transient Down	NA	NA	NA	NA	NA	NA	NA	NA	NA	NA	NA	NA	NA	NA	NA	0	0	1	0
FBgn0052590	CG32590	X	No Signal	0.0713	0.303823	NotSpec	2.13441	2.02925	1.92596	1.62371	1.69146	1.8185	1.2882	Not	NA	NA	NA	NA	NA	NA	NA	NA	NA	NA	NA	NA	NA	NA	NA	NA	NA	NA	NA	NA	NA	NA	NA	NA	NA	NA	0	0	0	0
FBgn0035206	CG9186	3	No Signal	0.032	0.410299	NotSpec	4.76107	5.09597	5.02757	5.76192	5.5522	6.08119	5.55139	Not	NA	NA	NA	NA	NA	NA	NA	NA	NA	NA	NA	NA	NA	NA	NA	NA	NA	NA	NA	NA	NA	NA	NA	NA	NA	NA	0	0	0	0
FBgn0039417	CG6073	3	No Signal	0.038	0.649894	NotSpec	2.85907	2.73894	2.63426	3.07325	2.88419	3.7048	4.42357	Not	NA	NA	NA	NA	NA	NA	NA	NA	Up	NA	Transient Up	Up	NA	Transient Up	NA	NA	NA	NA	NA	NA	NA	NA	NA	NA	NA	NA	2	1	0	0
FBgn0261020	wol	2	No Signal	0.051	0.674222	NotSpec	3.94982	4.25406	4.54517	6.3001	6.12842	3.9575	3.87735	Higher	Gland	NA	NA	NA	ST	PO	NA	NA	NA	NA	NA	NA	NA	NA	NA	NA	NA	NA	NA	NA	NA	NA	NA	NA	NA	NA	0	0	0	0
FBgn0039943	CG17168	X	No Signal	0.2355	0.406349	NotSpec	4.23377	3.96107	4.05968	3.82717	3.52992	3.3058	4.56411	Not	NA	NA	NA	NA	NA	NA	NA	NA	NA	NA	NA	NA	NA	NA	NA	NA	NA	NA	NA	NA	NA	NA	NA	NA	NA	NA	0	0	0	0
FBgn0032222	CG5037	2	No Signal	0.1026	0.433276	NotSpec	5.70734	5.30186	4.79854	4.58751	3.92783	5.98344	5.88143	Not	NA	NA	NA	NA	NA	NA	NA	NA	NA	NA	NA	NA	NA	NA	NA	NA	NA	NA	NA	NA	NA	NA	NA	NA	NA	NA	0	0	0	0
FBgn0030341	p24-1	X	Signal	0.0586	0.701825	NotSpec	5.19102	5.27898	5.89368	7.34817	7.67855	5.18356	5.19535	Higher	NA	NA	NA	NA	NA	PO	NA	NA	NA	NA	NA	NA	NA	NA	NA	NA	NA	NA	NA	NA	NA	NA	NA	Up	NA	Transient Up	0	0	0	0
FBgn0036035	CG18178	3	No Signal	0.1443	0.46809	NotSpec	2.03263	3.10652	2.7481	2.0491	2.66676	1.26207	2.72245	Not	NA	NA	NA	NA	NA	NA	NA	NA	Up	NA	Transient Up	NA	NA	NA	NA	NA	NA	NA	NA	NA	NA	NA	NA	NA	NA	NA	1	0	0	0
FBgn0038404	CG8925	3	No Signal	0.0701	0.988954	PO	1.18435	1.84851	2.09717	5.40488	9.6429	2.03875	1.19574	Higher	Gland	NA	NA	NA	ST	PO	NA	NA	NA	NA	NA	NA	NA	NA	NA	NA	NA	Down	Down	Persist Down	NA	NA	NA	NA	NA	NA	0	0	1	1
FBgn0038401	CG5916	3	No Signal	0.0305	0.853349	NotSpec	1.54604	1.80984	1.56796	2.04491	1.65137	1.91301	4.12048	Not	NA	NA	NA	NA	NA	NA	NA	NA	NA	NA	NA	NA	NA	NA	NA	NA	NA	NA	NA	NA	NA	NA	NA	NA	NA	NA	0	0	0	0
FBgn0039945	CG17159	X	No Signal	0.5133	0.568629	NotSpec	2.80121	2.65015	2.03476	1.64393	2.52049	0	0.280343	Not	NA	NA	NA	NA	NA	NA	NA	NA	NA	NA	NA	NA	NA	NA	NA	NA	NA	NA	NA	NA	NA	NA	NA	NA	NA	NA	0	0	0	0
FBgn0032224	Sps2	2	No Signal	NA	0.683239	NotSpec	5.58824	5.66568	5.13978	4.95326	4.69962	6.72194	3.76922	Higher	NA	NA	OVD	NA	NA	NA	FB	NA	Down	NA	Transient Down	NA	NA	NA	NA	NA	NA	NA	NA	NA	NA	NA	NA	NA	NA	NA	0	0	1	0
FBgn0029502	Coq7	X	No Signal	0.1046	0.525094	NotSpec	5.3472	4.97004	4.47986	4.08799	3.84849	3.61596	4.44719	Not	NA	NA	NA	NA	NA	NA	NA	NA	NA	NA	NA	NA	NA	NA	NA	NA	NA	NA	NA	NA	NA	NA	NA	NA	NA	NA	0	0	0	0
FBgn0266694	lncRNA:CR45184	3	No Signal	NA	0.636721	NotSpec	3.4311	3.49461	3.9826	5.22032	5.00117	4.83799	5.91976	Not	NA	NA	NA	NA	NA	NA	NA	NA	Up	NA	Transient Up	Up	NA	Transient Up	NA	NA	NA	NA	NA	NA	NA	NA	NA	NA	NA	NA	2	1	0	0
FBgn0266696	Svil	3	No Signal	0.2712	0.444474	NotSpec	7.12271	7.20224	7.40911	6.99941	6.76317	3.78827	5.00812	Higher	NA	NA	OVD	SR	ST	NA	NA	NA	Down	NA	Transient Down	NA	NA	NA	NA	NA	NA	NA	NA	NA	NA	NA	NA	NA	NA	NA	0	0	1	0
FBgn0031972	Wwox	2	No Signal	0.0362	0.435337	NotSpec	3.37881	3.73472	3.36897	3.57815	3.05924	4.21522	3.48745	Not	NA	NA	NA	NA	NA	NA	NA	NA	NA	NA	NA	NA	NA	NA	NA	NA	NA	NA	NA	NA	NA	NA	NA	NA	NA	NA	0	0	0	0
FBgn0031970	CG7227	2	No Signal	0.09	0.940274	FB	0.0519402	0.0424525	0.0896427	0.361836	0.22374	2.23862	0.806904	Not	NA	NA	NA	NA	NA	NA	NA	NA	NA	NA	NA	NA	NA	NA	NA	NA	NA	NA	NA	NA	NA	NA	NA	NA	NA	NA	0	0	0	0
FBgn0031977	baf	2	No Signal	0.0247	0.431019	NotSpec	5.58541	4.79713	5.31923	4.52242	4.54572	5.12978	4.12312	Not	NA	NA	NA	NA	NA	NA	NA	NA	Up	NA	Transient Up	NA	NA	NA	Up	NA	Transient Up	Up	NA	Transient Up	NA	NA	NA	NA	NA	NA	3	0	0	0
FBgn0031974	CG12560	2	No Signal	0.4302	0.553555	NotSpec	3.61292	3.01682	3.64552	3.4954	2.29432	4.19035	1.67764	Higher	NA	BUR	NA	SR	ST	NA	NA	NA	NA	NA	NA	Up	NA	Transient Up	NA	NA	NA	Up	NA	Transient Up	NA	NA	NA	NA	NA	NA	2	1	0	0
FBgn0060296	pain	2	No Signal	0.088	0.800609	NotSpec	4.61663	6.12891	5.12486	3.25527	3.79116	0.507927	2.09983	Higher	Epithelial	BUR	OVD	SR	NA	NA	NA	NA	NA	NA	NA	NA	NA	NA	NA	NA	NA	NA	NA	NA	NA	NA	NA	NA	NA	NA	0	0	0	0
FBgn0034184	CG9646	2	No Signal	0.0741	0.369357	NotSpec	4.08871	4.30456	4.41413	4.18128	4.05464	4.24628	4.85647	Not	NA	NA	NA	NA	NA	NA	NA	NA	NA	NA	NA	NA	NA	NA	NA	NA	NA	NA	NA	NA	NA	NA	NA	NA	NA	NA	0	0	0	0
FBgn0034186	CG8950	2	No Signal	0.032	0.84162	NotSpec	1.48579	1.71148	1.55043	1.97986	1.96654	1.4926	3.94362	Not	NA	NA	NA	NA	NA	NA	NA	NA	NA	NA	NA	NA	NA	NA	NA	NA	NA	NA	NA	NA	NA	NA	NA	NA	NA	NA	0	0	0	0
FBgn0034180	Ehbp1	2	No Signal	0.0835	0.447898	NotSpec	4.52614	4.4432	4.36058	3.32559	4.02262	2.12554	2.60285	Higher	NA	NA	OVD	NA	NA	NA	NA	NA	Down	NA	Transient Down	NA	NA	NA	NA	NA	NA	NA	NA	NA	NA	NA	NA	Up	Up	Persist Up	0	0	1	0
FBgn0034181	CG8963	2	No Signal	0.0605	0.35311	NotSpec	6.08941	6.21659	5.98427	6.71009	6.81808	5.09628	6.57593	Not	NA	NA	NA	NA	NA	NA	NA	NA	Down	NA	Transient Down	NA	NA	NA	NA	NA	NA	NA	NA	NA	NA	NA	NA	NA	NA	NA	0	0	1	0
FBgn0034182	SmydA-7	2	No Signal	0.1166	0.392625	NotSpec	2.96924	2.3464	2.94551	2.3651	2.22738	2.49771	1.39125	Higher	NA	BUR	NA	SR	NA	NA	NA	NA	NA	NA	NA	NA	NA	NA	NA	NA	NA	NA	NA	NA	NA	NA	NA	NA	NA	NA	0	0	0	0
FBgn0038742	Arc42	3	No Signal	0.0188	0.855537	NotSpec	4.39167	4.43336	4.46912	4.3838	4.46294	7.58496	5.99726	Not	NA	NA	NA	NA	NA	NA	NA	NA	NA	NA	NA	NA	NA	NA	NA	NA	NA	NA	NA	NA	NA	NA	NA	NA	NA	NA	0	0	0	0
FBgn0038740	CG4562	3	No Signal	NA	0.887906	NotSpec	1.56117	1.5711	1.16529	1.8932	0.942609	0.615723	3.89512	Not	NA	NA	NA	NA	NA	NA	NA	NA	NA	NA	NA	NA	NA	NA	NA	NA	NA	NA	NA	NA	NA	NA	NA	NA	NA	NA	0	0	0	0
FBgn0038741	CG17186	3	No Signal	0.241	0.61326	NotSpec	1.15961	1.52625	1.5682	1.60742	1.75984	0.343799	2.38288	Not	NA	NA	NA	NA	NA	NA	NA	NA	NA	NA	NA	NA	NA	NA	NA	NA	NA	NA	NA	NA	NA	NA	NA	NA	NA	NA	0	0	0	0
FBgn0038746	Surf6	3	No Signal	0.0371	0.793719	NotSpec	2.65754	3.25757	2.85708	3.33974	3.28489	3.98333	5.4484	Not	NA	NA	NA	NA	NA	NA	NA	NA	Up	NA	Transient Up	Up	NA	Transient Up	Up	NA	Transient Up	NA	NA	NA	NA	NA	NA	NA	NA	NA	3	1	0	0
FBgn0038747	RhoGAP92B	3	No Signal	0.0437	0.593215	NotSpec	4.93369	4.79827	5.54222	5.78028	6.51288	4.11802	5.61883	Not	NA	NA	NA	NA	NA	NA	NA	NA	Up	NA	Transient Up	NA	NA	NA	NA	NA	NA	NA	NA	NA	NA	NA	NA	NA	NA	NA	1	0	0	0
FBgn0038744	CG4733	3	No Signal	0.1061	0.569569	NotSpec	3.99782	4.13706	4.10298	1.80744	2.36231	1.19899	2.25079	Higher	NA	NA	OVD	SR	NA	NA	NA	NA	NA	NA	NA	NA	NA	NA	NA	NA	NA	NA	NA	NA	NA	NA	NA	NA	NA	NA	0	0	0	0
FBgn0266101	CG44838	3	No Signal	0.5015	0.502216	NotSpec	3.91528	3.84941	3.95828	1.52652	2.17231	1.03007	4.1069	Not	NA	NA	NA	NA	NA	NA	NA	NA	Down	NA	Transient Down	NA	NA	NA	NA	NA	NA	NA	NA	NA	NA	NA	NA	NA	NA	NA	0	0	1	0
FBgn0030519	CG11151	X	No Signal	0.0237	0.794766	NotSpec	6.87645	6.21826	6.28566	6.00021	6.36029	8.58963	5.97803	Not	NA	NA	NA	NA	NA	NA	FB	NA	NA	NA	NA	NA	NA	NA	NA	NA	NA	NA	NA	NA	NA	NA	NA	NA	NA	NA	0	0	0	0
FBgn0052333	CG32333	3	No Signal	0.0422	0.811596	NotSpec	2.46926	1.41108	2.76202	0.149269	0.147404	0	0.168956	Higher	NA	NA	OVD	SR	NA	NA	NA	NA	NA	NA	NA	NA	NA	NA	NA	NA	NA	NA	NA	NA	NA	NA	NA	NA	NA	NA	0	0	0	0
FBgn0030514	CG9941	X	No Signal	0.0268	0.668251	NotSpec	4.37007	4.34231	4.45496	4.72126	4.41193	3.2941	5.86932	Not	NA	NA	NA	NA	NA	NA	NA	NA	NA	NA	NA	NA	NA	NA	NA	NA	NA	NA	NA	NA	NA	NA	NA	NA	NA	NA	0	0	0	0
FBgn0030512	Nadsyn	X	No Signal	0.0184	0.752615	NotSpec	3.44509	3.48162	3.40322	3.39816	3.63381	5.00508	5.80862	Not	NA	NA	NA	NA	NA	NA	NA	NA	NA	NA	NA	NA	NA	NA	NA	NA	NA	NA	NA	NA	NA	NA	NA	NA	NA	NA	0	0	0	0
FBgn0030511	CG11158	X	No Signal	NA	0.840524	NotSpec	3.74691	3.00496	3.30918	4.25557	3.81313	6.11659	2.78951	Not	NA	NA	NA	NA	NA	NA	FB	NA	Up	NA	Transient Up	NA	NA	NA	NA	NA	NA	NA	NA	NA	NA	NA	NA	NA	NA	NA	1	0	0	0
FBgn0030510	CG12177	X	No Signal	0.0448	0.780224	NotSpec	4.5332	3.79612	3.55729	2.85358	3.3594	6.14187	4.9767	Not	NA	NA	NA	NA	NA	NA	NA	NA	NA	NA	NA	NA	NA	NA	NA	NA	NA	NA	NA	NA	NA	NA	NA	NA	NA	NA	0	0	0	0
FBgn0036964	FRG1	3	No Signal	NA	0.597623	NotSpec	3.2303	2.8905	3.13458	3.21206	3.48046	4.35524	2.80498	Not	NA	NA	NA	NA	NA	NA	NA	NA	NA	NA	NA	NA	NA	NA	NA	NA	NA	NA	NA	NA	NA	NA	NA	NA	NA	NA	0	0	0	0
FBgn0036967	SCCRO4	3	No Signal	0.0644	0.402475	NotSpec	4.51619	4.16684	4.25449	3.40017	3.90734	2.03944	4.14829	Not	NA	NA	NA	NA	NA	NA	NA	NA	NA	Up	Persist Up	NA	NA	NA	NA	NA	NA	NA	NA	NA	NA	NA	NA	NA	NA	NA	0	1	0	0
FBgn0000964	tj	2	No Signal	NA	0.770874	NotSpec	0.716547	1.28882	1.57292	1.41392	2.40907	3.59415	2.62997	Not	NA	NA	NA	NA	NA	NA	NA	NA	NA	NA	NA	NA	NA	NA	NA	NA	NA	NA	NA	NA	NA	NA	NA	NA	NA	NA	0	0	0	0
FBgn0033431	CG1827	2	Signal	0.0898	0.538983	NotSpec	3.43834	4.14893	4.79052	5.48754	5.58831	5.80807	3.16667	Higher	Gland	NA	NA	NA	ST	PO	FB	NA	NA	NA	NA	NA	NA	NA	NA	NA	NA	NA	NA	NA	NA	NA	NA	NA	NA	NA	0	0	0	0
FBgn0031609	CG15443	2	No Signal	0.2514	0.524133	NotSpec	2.53128	2.57403	2.50775	2.61394	2.62562	2.63362	3.52103	Not	NA	NA	NA	NA	NA	NA	NA	NA	NA	NA	NA	NA	NA	NA	NA	NA	NA	NA	NA	NA	NA	NA	NA	NA	NA	NA	0	0	0	0
FBgn0034988	cN-IIIB	2	No Signal	0.0395	0.214578	NotSpec	3.04952	2.87489	2.66906	3.21225	2.88737	2.93848	2.98598	Not	NA	NA	NA	NA	NA	NA	NA	NA	NA	NA	NA	NA	NA	NA	NA	NA	NA	NA	NA	NA	NA	NA	NA	NA	NA	NA	0	0	0	0
FBgn0034989	CG3356	2	No Signal	0.0671	0.414995	NotSpec	4.65899	4.65045	4.305	4.83135	4.60426	3.84172	5.26304	Not	NA	NA	NA	NA	NA	NA	NA	NA	Down	NA	Transient Down	NA	NA	NA	NA	NA	NA	NA	NA	NA	NA	NA	NA	NA	NA	NA	0	0	1	0
FBgn0010228	HmgZ	2	No Signal	0.001	0.611169	NotSpec	7.72486	6.96157	7.39123	7.19389	7.48731	8.49387	3.88842	Higher	allFRT	BUR	OVD	SR	ST	PO	FB	NA	NA	NA	NA	NA	NA	NA	NA	NA	NA	NA	NA	NA	NA	NA	NA	NA	NA	NA	0	0	0	0
FBgn0010226	GstS1	2	No Signal	0.1276	0.594722	NotSpec	3.36071	3.92127	4.56584	6.31794	4.97065	6.41699	5.67555	Not	NA	NA	NA	NA	NA	NA	NA	NA	NA	NA	NA	NA	NA	NA	NA	NA	NA	NA	Down	Persist Down	NA	NA	NA	NA	NA	NA	0	0	0	1
FBgn0010225	Gel	3	Signal	0.1516	0.890609	NotSpec	8.24178	8.21899	8.29823	7.96417	7.8913	11.1594	6.6997	Not	NA	NA	NA	NA	NA	NA	FB	NA	NA	NA	NA	NA	NA	NA	NA	NA	NA	NA	NA	NA	NA	NA	NA	NA	NA	NA	0	0	0	0
FBgn0040104	lectin-24A	2	Signal	NA	0.956446	FB	0.253587	0.226661	0.720522	0.318691	0.446411	3.46301	1.00034	Not	NA	NA	NA	NA	NA	NA	FB	NA	NA	NA	NA	NA	NA	NA	NA	NA	NA	NA	NA	NA	NA	NA	NA	NA	NA	NA	0	0	0	0
FBgn0034232	CG4866	2	No Signal	0.0214	0.649069	NotSpec	2.77681	2.56995	2.59425	3.11841	2.79516	4.7398	4.76574	Not	NA	NA	NA	NA	NA	NA	NA	NA	Up	NA	Transient Up	NA	NA	NA	NA	NA	NA	NA	NA	NA	NA	NA	NA	NA	NA	NA	1	0	0	0
FBgn0010222	Nmdmc	3	No Signal	0.0627	0.868893	NotSpec	3.99388	3.7486	4.11017	3.70823	3.68388	6.75501	4.13854	Not	NA	NA	NA	NA	NA	NA	NA	NA	Up	NA	Transient Up	NA	NA	NA	Up	NA	Transient Up	NA	NA	NA	NA	NA	NA	NA	NA	NA	2	0	0	0
FBgn0034982	Naa35	2	No Signal	0.0341	0.789659	NotSpec	3.90877	3.76007	3.72842	4.12233	3.76342	4.47187	6.16043	Not	NA	NA	NA	NA	NA	NA	NA	NA	NA	NA	NA	NA	NA	NA	NA	NA	NA	NA	NA	NA	NA	NA	NA	NA	NA	NA	0	0	0	0
FBgn0037899	RpL24-like	3	No Signal	0.1006	0.804289	NotSpec	7.42603	7.0389	6.43946	6.83803	7.15218	9.49301	7.67289	Not	NA	NA	NA	NA	NA	NA	NA	NA	NA	NA	NA	NA	NA	NA	NA	NA	NA	NA	NA	NA	NA	NA	NA	NA	NA	NA	0	0	0	0
FBgn0265254	lncRNA:CR44268	2	No Signal	NA	0.928728	FB	0.406353	0.452625	0.305051	0.344831	0.430657	2.52762	0.576281	Not	NA	NA	NA	NA	NA	NA	FB	NA	NA	NA	NA	NA	NA	NA	NA	NA	NA	NA	NA	NA	NA	NA	NA	NA	NA	NA	0	0	0	0
FBgn0037911	CG10898	3	No Signal	0.0372	0.598066	NotSpec	2.10292	1.98516	2.24066	2.27206	2.19323	1.01917	3.1101	Not	NA	NA	NA	NA	NA	NA	NA	NA	NA	NA	NA	NA	NA	NA	NA	NA	NA	NA	NA	NA	NA	NA	NA	NA	NA	NA	0	0	0	0
FBgn0085771	28SrRNA-Psi:CR40741	X	No Signal	NA	0.6414	NotSpec	3.672	3.49312	3.32971	3.43426	3.75794	4.79344	2.35511	Not	NA	NA	NA	NA	NA	NA	NA	NA	NA	NA	NA	NA	NA	NA	NA	NA	NA	NA	NA	NA	NA	NA	NA	NA	NA	NA	0	0	0	0
FBgn0037756	CG8507	3	Signal	0.0103	0.503336	NotSpec	5.51107	5.23833	5.74686	3.96813	4.8303	4.47547	3.73867	Not	NA	NA	NA	NA	NA	NA	NA	NA	NA	NA	NA	NA	NA	NA	NA	NA	NA	NA	NA	NA	NA	NA	NA	NA	NA	NA	0	0	0	0
FBgn0037757	CG8516	3	No Signal	0.0761	0.590519	NotSpec	3.77548	3.6759	4.08163	4.74495	4.26804	1.90294	5.18995	Not	NA	NA	NA	NA	NA	NA	NA	NA	NA	NA	NA	NA	NA	NA	NA	NA	NA	NA	NA	NA	NA	NA	NA	NA	NA	NA	0	0	0	0
FBgn0033661	CG13185	2	No Signal	NA	0.532834	NotSpec	0.881762	2.31823	1.71262	1.77107	2.54747	1.0002	2.02249	Not	NA	NA	NA	NA	NA	NA	NA	NA	NA	NA	NA	NA	NA	NA	NA	NA	NA	NA	NA	NA	NA	NA	NA	NA	NA	NA	0	0	0	0
FBgn0051739	AspRS-m	2	No Signal	0.0797	0.468486	NotSpec	3.98719	4.62653	4.20714	3.36943	4.06867	2.17443	3.96611	Not	NA	NA	NA	NA	NA	NA	NA	NA	NA	NA	NA	NA	NA	NA	NA	NA	NA	NA	NA	NA	NA	NA	NA	NA	NA	NA	0	0	0	0
FBgn0051224	CG31224	3	No Signal	0.114	0.312249	NotSpec	3.80964	4.33867	4.31217	3.54345	4.04254	1.97353	4.35276	Not	NA	NA	NA	NA	NA	NA	NA	NA	NA	NA	NA	NA	NA	NA	NA	NA	NA	NA	NA	NA	NA	NA	NA	NA	NA	NA	0	0	0	0
FBgn0040751	CG13018	2	No Signal	0.0135	0.703895	NotSpec	3.1809	2.36729	2.53815	2.08649	1.87046	4.12366	2.85858	Not	NA	NA	NA	NA	NA	NA	NA	NA	NA	NA	NA	NA	NA	NA	NA	NA	NA	NA	NA	NA	NA	NA	NA	NA	NA	NA	0	0	0	0
FBgn0043900	pygo	3	No Signal	0.0363	0.847767	NotSpec	3.60659	3.82566	3.32975	3.822	3.54216	2.64939	6.11696	Not	NA	NA	NA	NA	NA	NA	NA	NA	NA	NA	NA	NA	NA	NA	NA	NA	NA	NA	NA	NA	NA	NA	NA	NA	NA	NA	0	0	0	0
FBgn0051223	CG31223	3	No Signal	0.0976	0.409605	NotSpec	2.33336	2.35843	2.31823	2.5036	2.41028	2.9871	3.15773	Not	NA	NA	NA	NA	NA	NA	NA	NA	Up	NA	Transient Up	NA	NA	NA	NA	NA	NA	NA	NA	NA	NA	NA	NA	NA	NA	NA	1	0	0	0
FBgn0037180	CG14452	3	Signal	NA	0.9958	PO	1.02628	1.10895	1.55219	1.28966	8.53357	2.24009	0.0259559	Higher	NA	NA	OVD	SR	NA	PO	FB	NA	NA	NA	NA	NA	NA	NA	NA	NA	NA	NA	NA	NA	NA	NA	NA	NA	NA	NA	0	0	0	0
FBgn0039868	CG11563	3	No Signal	0.0279	0.569618	NotSpec	2.53327	2.83311	2.76821	3.392	3.11275	4.31806	4.42327	Not	NA	NA	NA	NA	NA	NA	NA	NA	Up	NA	Transient Up	NA	NA	NA	Up	NA	Transient Up	NA	NA	NA	NA	NA	NA	NA	NA	NA	2	0	0	0
FBgn0026575	hang	X	No Signal	0.1418	0.692557	NotSpec	3.22136	3.94873	3.43808	3.52343	3.92647	2.33768	5.09872	Not	NA	NA	NA	NA	NA	NA	NA	NA	NA	NA	NA	NA	NA	NA	NA	NA	NA	NA	NA	NA	NA	NA	NA	NA	NA	NA	0	0	0	0
FBgn0037185	CG11367	3	No Signal	0.1618	0.63974	NotSpec	1.65541	1.64377	1.80793	2.17626	2.7568	0.938212	3.14591	Not	NA	NA	NA	NA	NA	NA	NA	NA	NA	NA	NA	NA	NA	NA	NA	NA	NA	Up	NA	Transient Up	NA	NA	NA	NA	NA	NA	1	0	0	0
FBgn0051229	CG31229	3	No Signal	0.0712	0.769979	NotSpec	4.34096	3.91832	3.89909	3.63389	3.45326	6.04129	4.44901	Not	NA	NA	NA	NA	NA	NA	NA	NA	Up	NA	Transient Up	NA	NA	NA	NA	NA	NA	NA	NA	NA	NA	NA	NA	NA	NA	NA	1	0	0	0
FBgn0026570	CG5704	3	No Signal	NA	0.545081	NotSpec	1.8964	2.13454	2.28708	1.6475	2.81158	1.80048	1.49692	Not	NA	NA	NA	NA	NA	NA	NA	NA	NA	NA	NA	NA	NA	NA	NA	NA	NA	NA	NA	NA	NA	NA	NA	NA	NA	NA	0	0	0	0
FBgn0037186	CG11241	3	No Signal	0.1432	0.853893	NotSpec	4.23267	2.70209	3.26547	7.21383	4.32259	6.06735	3.72999	Higher	NA	NA	NA	NA	ST	NA	NA	NA	Down	NA	Transient Down	NA	NA	NA	NA	NA	NA	Down	NA	Transient Down	NA	NA	NA	NA	NA	NA	0	0	2	0
FBgn0260855	Sec22	X	No Signal	0.0498	0.629978	NotSpec	4.89564	5.0584	5.55375	7.08166	7.06193	4.93432	4.91899	Higher	Gland	NA	NA	NA	ST	PO	NA	NA	NA	NA	NA	NA	NA	NA	NA	NA	NA	NA	NA	NA	NA	NA	NA	Up	NA	Transient Up	0	0	0	0
FBgn0260857	Bet1	3	No Signal	0.0452	0.516639	NotSpec	3.40082	3.57195	4.30403	5.22883	5.26354	4.52599	3.55561	Not	NA	NA	NA	NA	NA	NA	NA	NA	Up	NA	Transient Up	NA	NA	NA	NA	NA	NA	NA	NA	NA	NA	NA	NA	NA	NA	NA	1	0	0	0
FBgn0260856	Membrin	3	No Signal	0.0136	0.522829	NotSpec	2.61248	2.42329	3.04608	4.18421	4.03389	3.441	3.03644	Not	NA	NA	NA	NA	NA	NA	NA	NA	Up	NA	Transient Up	NA	NA	NA	NA	NA	NA	NA	NA	NA	NA	NA	NA	Up	NA	Transient Up	1	0	0	0
FBgn0260859	Bet3	3	No Signal	0.0169	0.482826	NotSpec	5.05591	4.8007	4.61371	5.07457	4.80774	5.74565	4.46392	Not	NA	NA	NA	NA	NA	NA	NA	NA	NA	NA	NA	NA	NA	NA	NA	NA	NA	NA	NA	NA	NA	NA	NA	Down	NA	Transient Down	0	0	0	0
FBgn0260858	Ykt6	X	No Signal	0.0011	0.318421	NotSpec	4.08047	4.41609	4.48949	4.82198	4.89361	3.50875	4.52814	Not	NA	NA	NA	NA	NA	NA	NA	NA	NA	NA	NA	NA	NA	NA	NA	NA	NA	NA	NA	NA	NA	NA	NA	NA	NA	NA	0	0	0	0
FBgn0039431	plum	3	Signal	0.0405	0.77866	NotSpec	1.83919	2.41231	2.07028	0.472063	3.24388	0.21039	0.685173	Higher	NA	NA	OVD	SR	NA	PO	NA	NA	NA	NA	NA	NA	NA	NA	NA	NA	NA	NA	NA	NA	NA	NA	NA	NA	NA	NA	0	0	0	0
FBgn0039430	CG5455	3	No Signal	0.074	0.614524	NotSpec	4.53871	4.48289	4.46581	5.54795	4.72974	3.34704	2.9035	Higher	NA	NA	NA	NA	ST	NA	NA	NA	NA	NA	NA	NA	NA	NA	NA	NA	NA	NA	NA	NA	NA	NA	NA	NA	NA	NA	0	0	0	0
FBgn0032117	FucTB	2	No Signal	0.1999	0.420792	NotSpec	2.49836	2.18026	2.70413	2.16616	2.78213	1.14134	1.60226	Not	NA	NA	NA	NA	NA	NA	NA	NA	Down	NA	Transient Down	NA	NA	NA	NA	NA	NA	NA	NA	NA	NA	NA	NA	NA	NA	NA	0	0	1	0
FBgn0032116	Mco1	2	No Signal	0.1032	0.864717	NotSpec	2.81105	2.04505	0.551295	0.0586423	0.272817	0	1.03058	Not	NA	NA	NA	NA	NA	NA	NA	NA	Down	NA	Transient Down	Down	NA	Transient Down	NA	NA	NA	NA	NA	NA	NA	NA	NA	NA	NA	NA	0	0	2	1
FBgn0026879	CG13364	X	No Signal	NA	0.736267	NotSpec	5.997	5.48752	5.74795	5.84293	5.42865	7.49995	4.80267	Not	NA	NA	NA	NA	NA	NA	FB	NA	Up	NA	Transient Up	NA	NA	NA	NA	NA	NA	NA	NA	NA	NA	NA	NA	NA	NA	NA	1	0	0	0
FBgn0036258	eIF3l	3	No Signal	0.0222	0.584537	NotSpec	6.72759	6.78877	6.97856	7.06574	8.14184	6.89476	6.80697	Not	NA	NA	NA	NA	NA	NA	NA	NA	NA	NA	NA	NA	NA	NA	NA	NA	NA	NA	NA	NA	NA	NA	NA	Up	NA	Transient Up	0	0	0	0
FBgn0037760	FBXO11	3	Signal	0.024	0.691038	NotSpec	4.00562	4.26138	4.03867	3.61513	3.82645	2.03412	5.39614	Not	NA	NA	NA	NA	NA	NA	NA	NA	NA	NA	NA	NA	NA	NA	NA	NA	NA	NA	NA	NA	NA	NA	NA	NA	NA	NA	0	0	0	0
FBgn0036259	CG9760	3	No Signal	NA	0.860699	NotSpec	1.08741	1.85378	0.704166	0.115038	0.389303	0	0.0542243	Higher	NA	NA	OVD	NA	NA	NA	NA	NA	NA	NA	NA	NA	NA	NA	NA	NA	NA	NA	NA	NA	NA	NA	NA	NA	NA	NA	0	0	0	0
FBgn0036587	CG4950	3	Signal	0.0734	0.962031	SR	2.66037	5.15968	7.77093	1.39223	2.93188	0.627952	0.733039	Higher	NA	BUR	OVD	SR	NA	PO	NA	NA	Down	NA	Transient Down	NA	NA	NA	Down	NA	Transient Down	NA	NA	NA	Down	NA	Transient Down	NA	NA	NA	0	0	3	1
FBgn0036581	MED10	3	No Signal	0.0011	0.418427	NotSpec	5.21684	4.76089	4.89736	4.36048	4.37653	5.30068	2.21073	Higher	allFRT	BUR	OVD	SR	ST	PO	FB	NA	NA	NA	NA	NA	NA	NA	NA	NA	NA	NA	NA	NA	NA	NA	NA	NA	NA	NA	0	0	0	0
FBgn0036589	CG13067	3	Signal	NA	0.815686	NotSpec	4.55348	2.71531	3.36431	1.54158	2.57924	1.6853	0.921081	Higher	NA	BUR	NA	SR	NA	PO	NA	NA	NA	NA	NA	NA	NA	NA	NA	NA	NA	NA	NA	NA	NA	NA	NA	NA	NA	NA	0	0	0	0
FBgn0032805	CG10337	2	No Signal	0.1477	0.428781	NotSpec	2.93649	2.65238	4.08692	4.08833	2.8213	4.10275	2.6878	Not	NA	NA	NA	NA	NA	NA	NA	NA	Up	NA	Transient Up	Up	NA	Transient Up	Up	NA	Transient Up	NA	NA	NA	Up	NA	Transient Up	Up	NA	Transient Up	4	2	0	0
FBgn0032801	CG10165	2	No Signal	0.0612	0.805631	NotSpec	3.83837	4.32166	4.23291	4.86984	4.90562	6.68415	3.63708	Not	NA	NA	NA	NA	NA	NA	FB	NA	Up	NA	Transient Up	NA	NA	NA	NA	NA	NA	NA	NA	NA	NA	NA	NA	NA	NA	NA	1	0	0	0
FBgn0032800	CG10137	2	No Signal	0.0335	0.669679	NotSpec	3.09229	4.12404	2.48626	2.88607	2.99737	2.59054	1.60545	Higher	NA	NA	OVD	NA	NA	NA	NA	NA	NA	NA	NA	NA	NA	NA	NA	NA	NA	NA	NA	NA	NA	NA	NA	NA	NA	NA	0	0	0	0
FBgn0263316	Mrp4	3	No Signal	0.053	0.672597	NotSpec	4.06116	3.5377	4.75908	3.31094	3.28427	2.69969	1.46465	Higher	allFRT	BUR	OVD	SR	ST	PO	NA	NA	NA	NA	NA	NA	NA	NA	NA	NA	NA	NA	NA	NA	NA	NA	NA	Up	NA	Transient Up	0	0	0	0
FBgn0020509	Acp62F	3	Signal	NA	0.856518	NotSpec	1.9113	1.51902	0.519369	0	0.0981288	0	0.0110091	Higher	NA	NA	OVD	NA	NA	NA	NA	FRT.MRT	NA	NA	NA	NA	NA	NA	NA	NA	NA	NA	NA	NA	NA	NA	NA	NA	NA	NA	0	0	0	0
FBgn0020503	CLIP-190	2	No Signal	0.2337	0.522358	NotSpec	9.24127	8.66902	7.68571	8.87392	9.21657	5.60692	3.562	Higher	allFRT	BUR	OVD	SR	ST	PO	NA	NA	Down	NA	Transient Down	NA	NA	NA	NA	NA	NA	NA	NA	NA	NA	NA	NA	NA	NA	NA	0	0	1	0
FBgn0030466	CG15744	X	No Signal	0.0295	0.734615	NotSpec	1.83457	2.425	2.23396	2.65613	2.51616	1.14511	3.88157	Not	NA	NA	NA	NA	NA	NA	NA	NA	NA	NA	NA	NA	NA	NA	NA	NA	NA	NA	NA	NA	NA	NA	NA	NA	NA	NA	0	0	0	0
FBgn0030465	CG15743	X	No Signal	0.0129	0.723988	NotSpec	2.95071	3.53297	4.11283	4.01494	3.83864	3.02152	5.41909	Not	NA	NA	NA	NA	NA	NA	NA	NA	NA	NA	NA	NA	NA	NA	NA	NA	NA	NA	NA	NA	NA	NA	NA	NA	NA	NA	0	0	0	0
FBgn0032873	CG2614	2	No Signal	0.0611	0.432043	NotSpec	2.77269	3.17056	2.71596	3.16574	2.82799	2.22496	3.57337	Not	NA	NA	NA	NA	NA	NA	NA	NA	NA	NA	NA	NA	NA	NA	NA	NA	NA	NA	NA	NA	NA	NA	NA	NA	NA	NA	0	0	0	0
FBgn0024555	flfl	3	No Signal	0.0384	0.347917	NotSpec	4.94928	5.36758	5.04852	4.36948	5.22996	3.26356	4.99217	Not	NA	NA	NA	NA	NA	NA	NA	NA	NA	NA	NA	NA	NA	NA	NA	NA	NA	NA	NA	NA	NA	NA	NA	NA	NA	NA	0	0	0	0
FBgn0032453	CG6180	2	No Signal	0.2107	0.789837	NotSpec	7.32081	6.87829	6.74306	6.91015	6.60203	9.47356	8.22474	Not	NA	NA	NA	NA	NA	NA	NA	NA	NA	NA	NA	NA	NA	NA	NA	NA	NA	NA	NA	NA	NA	NA	NA	NA	NA	NA	0	0	0	0
FBgn0035461	ntc	3	No Signal	NA	0.33101	NotSpec	2.6742	2.74544	2.73196	2.28289	2.34845	1.40259	1.71097	Not	NA	NA	NA	NA	NA	NA	NA	NA	NA	NA	NA	NA	NA	NA	NA	NA	NA	NA	NA	NA	NA	NA	NA	NA	NA	NA	0	0	0	0
FBgn0035462	IntS10	3	No Signal	0.0418	0.384827	NotSpec	1.81966	1.8726	2.06205	2.52699	2.47092	0.930015	2.59311	Not	NA	NA	NA	NA	NA	NA	NA	NA	NA	NA	NA	NA	NA	NA	NA	NA	NA	NA	NA	NA	NA	NA	NA	NA	NA	NA	0	0	0	0
FBgn0030276	Dlic	X	No Signal	0.0757	0.386966	NotSpec	6.02545	6.16406	5.48198	5.63948	5.81706	3.55001	5.25948	Not	NA	NA	NA	NA	NA	NA	NA	NA	Down	NA	Transient Down	NA	NA	NA	NA	NA	NA	NA	NA	NA	NA	NA	NA	NA	NA	NA	0	0	1	0
FBgn0035464	PIG-B	3	No Signal	0.0684	0.584784	NotSpec	2.40648	2.4279	2.24705	3.03921	2.32661	1.55755	3.49568	Not	NA	NA	NA	NA	NA	NA	NA	NA	NA	NA	NA	NA	NA	NA	NA	NA	NA	NA	NA	NA	NA	NA	NA	NA	NA	NA	0	0	0	0
FBgn0037891	CG5214	3	No Signal	0.0591	0.567372	NotSpec	7.56623	7.00049	6.62259	5.79575	5.70027	6.76109	5.72167	Not	NA	NA	NA	NA	NA	NA	NA	NA	NA	NA	NA	NA	NA	NA	NA	NA	NA	NA	NA	NA	NA	NA	NA	NA	NA	NA	0	0	0	0
FBgn0020647	KrT95D	3	No Signal	0.0493	0.747993	NotSpec	4.32458	3.38251	3.67976	6.35436	4.56251	3.53656	5.63481	Not	NA	NA	NA	NA	NA	NA	NA	NA	NA	NA	NA	NA	NA	NA	NA	NA	NA	Down	NA	Transient Down	NA	NA	NA	NA	NA	NA	0	0	1	0
FBgn0033602	Cpr47Ee	2	Signal	0.0511	0.75076	NotSpec	1.66899	0.401676	0.276971	1.7401	0.378351	0.0504182	0.538209	Higher	NA	NA	NA	NA	ST	NA	NA	NA	NA	NA	NA	NA	NA	NA	NA	NA	NA	NA	NA	NA	NA	NA	NA	NA	NA	NA	0	0	0	0
FBgn0266848	wap	X	No Signal	0.0007	0.371152	NotSpec	3.48884	4.11986	3.81486	2.94206	3.89848	1.93763	4.00882	Not	NA	NA	NA	NA	NA	NA	NA	NA	NA	NA	NA	NA	NA	NA	NA	NA	NA	NA	NA	NA	NA	NA	NA	NA	NA	NA	0	0	0	0
FBgn0033605	CG9067	2	No Signal	0.0204	0.521871	NotSpec	3.18695	2.93305	3.16068	2.99765	3.06577	3.88472	1.79078	Not	NA	NA	NA	NA	NA	NA	NA	NA	NA	NA	NA	NA	NA	NA	NA	NA	NA	NA	NA	NA	NA	NA	NA	NA	NA	NA	0	0	0	0
FBgn0028416	Met75Ca	3	Signal	NA	0.989685	OVD	0	1.21921	0.030504	0.0127619	0.0480994	0.0258004	0	Higher	NA	NA	OVD	NA	NA	NA	NA	FRT.MRT	NA	NA	NA	NA	NA	NA	NA	NA	NA	NA	NA	NA	NA	NA	NA	NA	NA	NA	0	0	0	0
FBgn0033608	CG13220	2	No Signal	0.0136	0.720345	NotSpec	6.2636	5.69701	5.55163	5.20134	5.02628	7.44205	5.67553	Not	NA	NA	NA	NA	NA	NA	NA	NA	NA	NA	NA	NA	NA	NA	NA	NA	NA	NA	NA	NA	NA	NA	NA	NA	NA	NA	0	0	0	0
FBgn0028411	Nxt1	2	No Signal	0.0761	0.664296	NotSpec	3.59605	3.28105	3.26854	3.48917	3.10172	4.43025	5.09489	Not	NA	NA	NA	NA	NA	NA	NA	NA	Up	NA	Transient Up	NA	NA	NA	NA	NA	NA	NA	NA	NA	NA	NA	NA	NA	NA	NA	1	0	0	0
FBgn0261811	pico	X	No Signal	0.0989	0.866457	NotSpec	4.11675	4.19212	4.6183	3.28135	4.27579	3.37607	6.88138	Not	NA	NA	NA	NA	NA	NA	NA	NA	NA	NA	NA	NA	NA	NA	NA	NA	NA	NA	NA	NA	NA	NA	NA	NA	NA	NA	0	0	0	0
FBgn0031975	Tg	2	No Signal	0.0352	0.791788	NotSpec	6.70262	6.96716	4.96719	2.9287	2.49175	1.34086	3.29999	Higher	NA	BUR	OVD	NA	NA	NA	NA	NA	NA	NA	NA	NA	NA	NA	NA	NA	NA	NA	NA	NA	NA	NA	NA	NA	NA	NA	0	0	0	0
FBgn0024889	Kap-alpha1	3	No Signal	0.1127	0.167037	NotSpec	5.06427	5.11031	4.72893	5.18126	4.82447	4.8037	4.98	Not	NA	NA	NA	NA	NA	NA	NA	NA	NA	NA	NA	NA	NA	NA	NA	NA	NA	NA	NA	NA	NA	NA	NA	Up	NA	Transient Up	0	0	0	0
FBgn0039860	CG1792	3	No Signal	0.2251	0.691739	NotSpec	1.73403	1.63206	1.764	1.85364	1.73674	1.44572	3.05232	Not	NA	NA	NA	NA	NA	NA	NA	NA	NA	NA	NA	NA	NA	NA	NA	NA	NA	NA	NA	NA	NA	NA	NA	NA	NA	NA	0	0	0	0
FBgn0024887	kin17	3	No Signal	0.0646	0.16697	NotSpec	3.03559	3.30846	3.08557	3.1273	3.22393	2.64481	3.24719	Not	NA	NA	NA	NA	NA	NA	NA	NA	NA	NA	NA	NA	NA	NA	NA	NA	NA	NA	NA	NA	NA	NA	NA	NA	NA	NA	0	0	0	0
FBgn0024330	MED6	3	No Signal	0.0321	0.376492	NotSpec	2.60665	3.32525	2.77916	3.01188	2.94791	1.01403	3.16966	Not	NA	NA	NA	NA	NA	NA	NA	NA	NA	NA	NA	NA	NA	NA	NA	NA	NA	NA	NA	NA	NA	NA	NA	NA	NA	NA	0	0	0	0
FBgn0035601	Uev1A	3	No Signal	0.0011	0.563316	NotSpec	7.21015	6.45653	6.97432	6.73163	6.671	8.06855	7.09757	Not	NA	NA	NA	NA	NA	NA	NA	NA	NA	NA	NA	NA	NA	NA	NA	NA	NA	NA	NA	NA	NA	NA	NA	NA	NA	NA	0	0	0	0
FBgn0263768	lncRNA:CR43685	3	No Signal	NA	0.5405	NotSpec	2.6814	2.9959	3.23904	2.0303	2.32483	0.965062	1.93899	Not	NA	NA	NA	NA	NA	NA	NA	NA	NA	NA	NA	NA	NA	NA	NA	NA	NA	NA	NA	NA	NA	NA	NA	NA	NA	NA	0	0	0	0
FBgn0039861	pasha	3	No Signal	0.0472	0.757658	NotSpec	1.99237	2.34937	1.87649	2.16308	2.41651	1.47029	3.83767	Not	NA	NA	NA	NA	NA	NA	NA	NA	NA	NA	NA	NA	NA	NA	NA	NA	NA	NA	NA	NA	NA	NA	NA	NA	NA	NA	0	0	0	0
FBgn0033663	ERp60	2	Signal	0.0368	0.777114	NotSpec	8.17333	7.57679	11.2339	10.126	10.1311	7.38623	8.4084	Higher	NA	NA	NA	SR	NA	NA	NA	NA	NA	NA	NA	NA	NA	NA	NA	NA	NA	NA	NA	NA	NA	NA	NA	Up	NA	Transient Up	0	0	0	0
FBgn0267242	asRNA:CR45682	3	No Signal	NA	0.715135	NotSpec	1.69511	2.52634	1.92384	1.48998	0.615281	0.774778	0.0753559	Higher	NA	NA	OVD	SR	NA	NA	NA	NA	NA	NA	NA	NA	NA	NA	NA	NA	NA	NA	NA	NA	NA	NA	NA	NA	NA	NA	0	0	0	0
FBgn0034471	Obp56e	2	Signal	NA	0.997019	WF	0.170266	0	0	0	0.120075	0	3.68443	Not	NA	NA	NA	NA	NA	NA	NA	FRT.MRT	Up	Up	Persist Up	NA	NA	NA	NA	NA	NA	NA	NA	NA	NA	NA	NA	NA	NA	NA	1	1	0	0
FBgn0003721	Tm1	3	No Signal	NA	0.810666	NotSpec	11.0822	10.3106	9.47701	7.05383	7.70013	5.57146	6.59699	Higher	Epithelial	BUR	OVD	SR	NA	NA	NA	NA	NA	NA	NA	NA	NA	NA	NA	Up	Persist Up	NA	Up	Persist Up	NA	NA	NA	NA	NA	NA	0	2	0	0
FBgn0085360	CG34331	X	Signal	NA	0.853248	NotSpec	2.75343	4.34545	5.966	3.3407	4.14989	7.04779	2.05559	Higher	NA	NA	OVD	SR	NA	PO	FB	NA	NA	NA	NA	NA	NA	NA	NA	NA	NA	NA	NA	NA	NA	NA	NA	NA	NA	NA	0	0	0	0
FBgn0260940	lsn	3	No Signal	0.0209	0.19616	NotSpec	3.77742	3.52317	3.7004	3.82021	3.66657	3.31252	3.0809	Not	NA	NA	NA	NA	NA	NA	NA	NA	NA	NA	NA	NA	NA	NA	NA	NA	NA	NA	NA	NA	NA	NA	NA	NA	NA	NA	0	0	0	0
FBgn0052100	CG32100	3	No Signal	0.0546	0.451138	NotSpec	2.084	2.51027	2.06236	1.54116	1.80449	0.434631	2.40531	Not	NA	NA	NA	NA	NA	NA	NA	NA	NA	NA	NA	NA	NA	NA	NA	NA	NA	NA	NA	NA	NA	NA	NA	NA	NA	NA	0	0	0	0
FBgn0052103	SCaMC	3	No Signal	0.0358	0.263851	NotSpec	4.89224	5.57779	5.47401	4.88546	5.35139	5.31742	4.8146	Not	NA	NA	NA	NA	NA	NA	NA	NA	NA	NA	NA	NA	NA	NA	NA	NA	NA	NA	NA	NA	NA	NA	NA	NA	NA	NA	0	0	0	0
FBgn0052104	CG32104	3	No Signal	0.1347	0.819385	NotSpec	3.06577	2.13715	2.21836	4.97081	2.36684	0.828734	3.86194	Not	NA	NA	NA	NA	NA	NA	NA	NA	Up	Up	Persist Up	NA	NA	NA	NA	NA	NA	Up	NA	Transient Up	NA	NA	NA	NA	NA	NA	2	1	0	0
FBgn0025681	CG3558	2	No Signal	0.0414	0.445672	NotSpec	5.12451	4.94676	4.88939	4.62695	4.28001	4.00761	5.52276	Not	NA	NA	NA	NA	NA	NA	NA	NA	NA	NA	NA	NA	NA	NA	NA	NA	NA	NA	NA	NA	NA	NA	NA	NA	NA	NA	0	0	0	0
FBgn0025680	cry	3	No Signal	0.0521	0.687626	NotSpec	6.4205	7.2493	5.99098	7.47328	6.91011	8.37057	4.64875	Higher	NA	NA	OVD	NA	ST	PO	FB	NA	NA	NA	NA	NA	NA	NA	NA	NA	NA	NA	NA	NA	NA	NA	NA	NA	NA	NA	0	0	0	0
FBgn0025683	CG3164	2	No Signal	0.0332	0.505149	NotSpec	6.95508	7.0475	7.07026	7.73972	7.87478	8.22902	5.77294	Not	NA	NA	NA	NA	NA	NA	NA	NA	NA	NA	NA	NA	NA	NA	NA	NA	NA	NA	NA	NA	NA	NA	NA	NA	NA	NA	0	0	0	0
FBgn0025682	scf	3	Signal	0.1174	0.639479	NotSpec	3.32474	3.72164	5.69268	3.40955	3.5327	5.43173	4.76243	Not	NA	NA	NA	NA	NA	NA	NA	NA	Up	NA	Transient Up	NA	NA	NA	NA	NA	NA	NA	NA	NA	NA	NA	NA	Up	NA	Transient Up	1	0	0	0
FBgn0025684	MFS18	2	No Signal	0.0145	0.512853	NotSpec	3.10776	3.39402	3.71377	5.06998	4.52587	3.72693	5.03238	Not	NA	NA	NA	NA	NA	NA	NA	NA	NA	NA	NA	NA	NA	NA	NA	NA	NA	NA	NA	NA	NA	NA	NA	NA	NA	NA	0	0	0	0
FBgn0034346	PIG-O	2	No Signal	0.0489	0.676	NotSpec	3.10028	3.47503	2.89528	3.11596	2.90865	1.84034	4.46182	Not	NA	NA	NA	NA	NA	NA	NA	NA	NA	NA	NA	NA	NA	NA	NA	NA	NA	NA	NA	NA	NA	NA	NA	NA	NA	NA	0	0	0	0
FBgn0039863	CG1815	3	No Signal	0.2399	0.643452	NotSpec	3.66456	4.40808	4.04502	3.76586	5.0288	1.58324	2.7399	Higher	NA	NA	NA	NA	NA	PO	NA	NA	NA	NA	NA	NA	NA	NA	NA	NA	NA	NA	NA	NA	NA	NA	NA	NA	NA	NA	0	0	0	0
FBgn0040658	CG13516	2	No Signal	0.0658	0.446512	NotSpec	3.71244	3.47667	3.65651	4.35922	4.04109	3.87099	1.53223	Higher	allFRT	BUR	OVD	SR	ST	PO	NA	NA	Up	NA	Transient Up	NA	NA	NA	NA	NA	NA	NA	NA	NA	NA	NA	NA	NA	NA	NA	1	0	0	0
FBgn0014022	Rlb1	3	No Signal	0.2314	0.402194	NotSpec	1.95166	2.44903	2.15124	1.59948	2.38158	0.895398	1.84288	Not	NA	NA	NA	NA	NA	NA	NA	NA	NA	NA	NA	NA	NA	NA	NA	NA	NA	NA	NA	NA	NA	NA	NA	NA	NA	NA	0	0	0	0
FBgn0039864	CG11550	3	No Signal	0.0417	0.976946	SR	0.134215	0.0366513	2.30151	0	0	0.0760569	0.450195	Higher	NA	NA	NA	SR	NA	NA	NA	NA	NA	NA	NA	NA	NA	NA	NA	NA	NA	NA	NA	NA	NA	NA	NA	NA	NA	NA	0	0	0	0
FBgn0026015	Top3beta	X	No Signal	0.0613	0.825849	NotSpec	3.58918	3.70458	3.61361	4.3473	4.20359	3.899	6.36383	Not	NA	NA	NA	NA	NA	NA	NA	NA	NA	NA	NA	NA	NA	NA	NA	NA	NA	NA	NA	NA	NA	NA	NA	NA	NA	NA	0	0	0	0
FBgn0010173	RpA-70	3	No Signal	0.0403	0.882194	NotSpec	5.02505	4.77174	4.60905	4.50297	4.49781	4.44342	7.6905	Not	NA	NA	NA	NA	NA	NA	NA	NA	NA	NA	NA	NA	NA	NA	NA	NA	NA	NA	NA	NA	NA	NA	NA	NA	NA	NA	0	0	0	0
FBgn0260468	CG7950	3	No Signal	0.0481	0.714489	NotSpec	2.52686	2.63116	2.36263	2.68424	2.41312	4.55373	4.81001	Not	NA	NA	NA	NA	NA	NA	NA	NA	Up	NA	Transient Up	NA	NA	NA	NA	NA	NA	NA	NA	NA	NA	NA	NA	NA	NA	NA	1	0	0	0
FBgn0265003	koi	2	No Signal	0.1733	0.361764	NotSpec	5.42265	5.66157	5.66418	5.49172	5.88772	2.49108	5.09019	Not	NA	NA	NA	NA	NA	NA	NA	NA	NA	NA	NA	NA	NA	NA	NA	NA	NA	NA	NA	NA	NA	NA	NA	Up	NA	Transient Up	0	0	0	0
FBgn0265002	CG44153	2	Signal	0.0771	0.954598	SR	0.676787	0.429575	2.38398	0.054519	0.0662913	0	0.161665	Higher	NA	NA	NA	SR	NA	NA	NA	NA	NA	NA	NA	NA	NA	NA	NA	NA	NA	NA	NA	NA	NA	NA	NA	NA	NA	NA	0	0	0	0
FBgn0041709	yellow-g	3	Signal	0.014	0.995158	WF	0.35249	0.671887	2.24815	0	0.181995	0	7.36353	Not	NA	NA	NA	NA	NA	NA	NA	NA	NA	NA	NA	NA	NA	NA	NA	NA	NA	NA	NA	NA	NA	NA	NA	NA	NA	NA	0	0	0	0
FBgn0035205	Ctr9	3	No Signal	0.033	0.580265	NotSpec	4.39809	4.51988	4.51215	4.67774	4.55545	3.36679	5.6075	Not	NA	NA	NA	NA	NA	NA	NA	NA	NA	NA	NA	NA	NA	NA	NA	NA	NA	NA	NA	NA	NA	NA	NA	NA	NA	NA	0	0	0	0
FBgn0003187	qua	2	No Signal	0.0875	0.970646	WF	0.161003	1.04691	0.277728	1.52704	0.212475	0	4.35862	Not	NA	NA	NA	NA	NA	NA	NA	NA	NA	NA	NA	NA	NA	NA	NA	NA	NA	NA	NA	NA	NA	NA	NA	NA	NA	NA	0	0	0	0
FBgn0003189	r	X	No Signal	0.0726	0.82865	NotSpec	1.53592	1.71364	2.5255	4.87706	4.09851	4.72627	6.28108	Not	NA	NA	NA	NA	NA	NA	NA	NA	Up	NA	Transient Up	NA	NA	NA	NA	NA	NA	NA	NA	NA	NA	NA	NA	NA	Down	Persist Down	1	0	0	0
FBgn0037978	KLHL18	3	No Signal	0.0216	0.7474	NotSpec	2.94586	2.4287	2.78711	3.25757	2.52148	5.0036	4.15441	Not	NA	NA	NA	NA	NA	NA	NA	NA	NA	NA	NA	NA	NA	NA	NA	NA	NA	NA	NA	NA	NA	NA	NA	NA	NA	NA	0	0	0	0
FBgn0037979	GCC185	3	No Signal	0.116	0.490424	NotSpec	3.18676	3.77289	3.59139	3.02893	3.94224	0.961188	2.32317	Not	NA	NA	NA	NA	NA	NA	NA	NA	NA	NA	NA	NA	NA	NA	NA	NA	NA	NA	NA	NA	NA	NA	NA	NA	NA	NA	0	0	0	0
FBgn0037973	CG18547	3	No Signal	0.0624	0.896461	NotSpec	2.85924	3.37923	4.06585	4.86993	3.81015	7.08451	3.58699	Not	NA	NA	NA	NA	NA	NA	FB	NA	Up	NA	Transient Up	NA	NA	NA	NA	NA	NA	Up	NA	Transient Up	NA	NA	NA	Down	NA	Transient Down	2	0	0	0
FBgn0037974	CG12224	3	No Signal	NA	0.940567	FB	2.45019	2.91809	4.2114	3.86174	3.43545	7.36129	2.88207	Not	NA	NA	NA	NA	NA	NA	FB	NA	NA	NA	NA	NA	NA	NA	NA	NA	NA	NA	NA	NA	NA	NA	NA	Down	NA	Transient Down	0	0	0	0
FBgn0037975	CG3397	3	No Signal	0.0531	0.971359	FB	3.19498	3.40333	4.37273	4.21893	4.48334	9.07132	4.0728	Not	NA	NA	NA	NA	NA	NA	FB	NA	NA	NA	NA	NA	NA	NA	NA	NA	NA	NA	NA	NA	NA	NA	NA	NA	NA	NA	0	0	0	0
FBgn0000578	ena	2	No Signal	0.0553	0.685514	NotSpec	1.31935	2.19019	3.43904	1.82063	2.74734	0.522865	2.54465	Not	NA	NA	NA	NA	NA	NA	NA	NA	NA	NA	NA	NA	NA	NA	NA	NA	NA	NA	NA	NA	NA	NA	NA	NA	NA	NA	0	0	0	0
FBgn0000579	Eno	2	No Signal	0.1105	0.697539	NotSpec	6.71026	6.57264	5.81035	5.58674	5.45186	7.95741	6.74701	Not	NA	NA	NA	NA	NA	NA	NA	NA	NA	NA	NA	NA	NA	NA	NA	NA	NA	NA	NA	NA	NA	NA	NA	Down	NA	Transient Down	0	0	0	0
FBgn0039296	Sil1	3	Signal	0.0949	0.529518	NotSpec	2.17971	2.21467	2.38068	3.47928	3.51838	2.62346	3.82391	Not	NA	NA	NA	NA	NA	NA	NA	NA	Up	NA	Transient Up	NA	NA	NA	Up	NA	Transient Up	Up	NA	Transient Up	NA	NA	NA	Up	NA	Transient Up	3	0	0	0
FBgn0051901	Mur29B	2	Signal	0.4636	0.860526	NotSpec	0.80254	1.55632	0.24797	0.0810249	0	0	0.709168	Not	NA	NA	NA	NA	NA	NA	NA	NA	NA	NA	NA	NA	NA	NA	NA	NA	NA	NA	NA	NA	NA	NA	NA	NA	NA	NA	0	0	0	0
FBgn0000576	ems	3	No Signal	0.0181	0.977598	BUR	4.14584	0.882011	0.958011	0.153934	0.429494	0	0	Higher	NA	BUR	NA	NA	NA	NA	NA	NA	NA	NA	NA	NA	NA	NA	NA	NA	NA	NA	NA	NA	NA	NA	NA	NA	NA	NA	0	0	0	0
FBgn0000577	en	2	No Signal	0.0114	0.901528	BUR	3.27072	2.13659	1.12635	0.230507	0.408481	0	0.0435412	Higher	NA	BUR	OVD	NA	NA	NA	NA	NA	Down	NA	Transient Down	NA	NA	NA	NA	NA	NA	NA	NA	NA	NA	NA	NA	NA	NA	NA	0	0	1	0
FBgn0000575	emc	3	No Signal	0.0463	0.717061	NotSpec	5.44829	6.377	5.57768	4.44744	4.52576	2.15887	2.22022	Higher	allFRT	BUR	OVD	SR	ST	PO	NA	NA	NA	NA	NA	NA	NA	NA	NA	NA	NA	NA	NA	NA	NA	NA	NA	NA	NA	NA	0	0	0	0
FBgn0038903	RpI12	3	No Signal	0.0347	0.610963	NotSpec	2.06346	2.13253	1.59804	1.71651	1.46122	3.00607	2.25894	Not	NA	NA	NA	NA	NA	NA	NA	NA	Up	NA	Transient Up	NA	NA	NA	Up	NA	Transient Up	NA	NA	NA	NA	NA	NA	NA	NA	NA	2	0	0	0
FBgn0259732	tal-3A	3	No Signal	NA	0.850997	NotSpec	6.89794	4.28965	6.23146	1.86916	3.25208	0.760295	1.10798	Higher	NA	BUR	OVD	SR	NA	PO	NA	NA	Down	NA	Transient Down	NA	NA	NA	NA	NA	NA	NA	NA	NA	NA	NA	NA	NA	NA	NA	0	0	1	0
FBgn0259734	Nost	X	No Signal	0.0819	0.565818	NotSpec	5.31359	5.56741	5.33637	4.70406	5.68028	1.28033	6.29088	Not	NA	NA	NA	NA	NA	NA	NA	NA	Down	NA	Transient Down	NA	NA	NA	NA	NA	NA	NA	NA	NA	NA	NA	NA	NA	NA	NA	0	0	1	0
FBgn0259735	CG42389	2	No Signal	0.1405	0.592441	NotSpec	3.64785	3.99264	5.05326	3.99333	5.47288	2.00222	4.934	Not	NA	NA	NA	NA	NA	NA	NA	NA	NA	NA	NA	NA	NA	NA	NA	NA	NA	NA	NA	NA	NA	NA	NA	NA	NA	NA	0	0	0	0
FBgn0259736	CG42390	3	No Signal	0.1193	0.755237	NotSpec	6.94439	6.45545	6.18764	2.52671	3.84927	0.413644	1.69951	Higher	NA	BUR	OVD	SR	NA	PO	NA	NA	Down	NA	Transient Down	NA	NA	NA	NA	NA	NA	NA	NA	NA	NA	NA	NA	NA	NA	NA	0	0	1	0
FBgn0039600	CG1646	3	No Signal	0.0913	0.467302	NotSpec	4.34068	4.79169	4.5287	5.46219	5.18278	3.8062	4.48241	Not	NA	NA	NA	NA	NA	NA	NA	NA	NA	NA	NA	NA	NA	NA	NA	NA	NA	NA	NA	NA	NA	NA	NA	NA	NA	NA	0	0	0	0
FBgn0039601	CG1523	3	No Signal	0.077	0.632289	NotSpec	3.58389	3.38247	3.5388	4.25344	4.169	3.70448	5.18654	Not	NA	NA	NA	NA	NA	NA	NA	NA	NA	NA	NA	NA	NA	NA	NA	NA	NA	NA	NA	NA	NA	NA	NA	NA	NA	NA	0	0	0	0
FBgn0039602	CG1647	3	No Signal	0.2726	0.445739	NotSpec	1.45591	1.99672	1.74165	1.28189	1.83521	0.366257	1.3619	Not	NA	NA	NA	NA	NA	NA	NA	NA	NA	NA	NA	NA	NA	NA	NA	NA	NA	NA	NA	NA	NA	NA	NA	NA	NA	NA	0	0	0	0
FBgn0039609	Nepl17	3	Signal	0.194	0.955587	FB	0.433702	0.457808	0.573715	0.664116	1.04544	3.63734	0.248971	Not	NA	NA	NA	NA	NA	NA	FB	NA	NA	NA	NA	NA	NA	NA	NA	NA	NA	NA	NA	NA	NA	NA	NA	NA	NA	NA	0	0	0	0
FBgn0259728	CG42382	2	No Signal	0.2158	0.575155	NotSpec	2.00057	1.92606	1.95015	2.14454	1.99825	2.3598	3.09394	Not	NA	NA	NA	NA	NA	NA	NA	NA	NA	NA	NA	NA	NA	NA	NA	NA	NA	NA	NA	NA	NA	NA	NA	NA	NA	NA	0	0	0	0
FBgn0031452	Cwc25	2	No Signal	0.0787	0.534485	NotSpec	1.59989	2.14552	1.87062	1.13612	1.5325	1.00787	2.42574	Not	NA	NA	NA	NA	NA	NA	NA	NA	NA	NA	NA	NA	NA	NA	NA	NA	NA	NA	NA	NA	NA	NA	NA	NA	NA	NA	0	0	0	0
FBgn0030724	Nipsnap	X	No Signal	0.0522	0.532729	NotSpec	5.62279	5.71719	5.56295	5.35652	6.0196	6.55662	3.59778	Higher	NA	NA	OVD	SR	NA	PO	NA	NA	Down	NA	Transient Down	NA	NA	NA	NA	NA	NA	NA	NA	NA	NA	NA	NA	NA	NA	NA	0	0	1	0
FBgn0030720	CG8939	X	No Signal	0.0655	0.590208	NotSpec	2.60202	3.38837	2.95265	3.836	3.93289	3.2598	4.60596	Not	NA	NA	NA	NA	NA	NA	NA	NA	Up	NA	Transient Up	NA	NA	NA	Up	NA	Transient Up	NA	NA	NA	NA	NA	NA	Up	NA	Transient Up	2	0	0	0
FBgn0034246	Dcr-2	2	No Signal	0.342	0.531737	NotSpec	3.18208	4.87025	4.42633	3.90942	4.94871	2.88789	2.94555	Higher	NA	NA	OVD	NA	NA	PO	NA	NA	NA	NA	NA	NA	NA	NA	NA	NA	NA	NA	NA	NA	NA	NA	NA	Up	NA	Transient Up	0	0	0	0
FBgn0011327	Uch-L5	3	No Signal	0.0438	0.72631	NotSpec	4.14885	4.24175	3.78098	4.06461	4.20708	3.67951	5.83995	Not	NA	NA	NA	NA	NA	NA	NA	NA	NA	NA	NA	NA	NA	NA	NA	NA	NA	NA	NA	NA	NA	NA	NA	NA	NA	NA	0	0	0	0
FBgn0050042	Cpr49Ab	2	Signal	0.068	0.962735	WF	1.80224	1.10751	1.22801	1.39139	1.73438	1.57185	5.63772	Not	NA	NA	NA	NA	NA	NA	NA	NA	NA	NA	NA	NA	NA	NA	NA	NA	NA	NA	NA	NA	NA	NA	NA	NA	NA	NA	0	0	0	0
FBgn0034152	Acp53C14a	2	Signal	0.2623	0.999029	PO	0.885593	0	0	0	9.38144	2.0113	0	Higher	NA	NA	NA	NA	NA	PO	NA	FRT.MRT	NA	NA	NA	NA	NA	NA	NA	NA	NA	NA	NA	NA	NA	NA	NA	NA	NA	NA	0	0	0	0
FBgn0011638	La	2	No Signal	0.0548	0.768509	NotSpec	5.42862	5.35222	5.11423	5.85142	5.482	6.88033	7.91052	Not	NA	NA	NA	NA	NA	NA	NA	NA	Up	NA	Transient Up	Up	NA	Transient Up	Up	NA	Transient Up	NA	NA	NA	NA	NA	NA	NA	NA	NA	3	1	0	0
FBgn0029903	pod1	X	No Signal	0.0177	0.385887	NotSpec	3.90323	4.90183	4.63455	4.22708	4.60408	1.6731	4.72414	Not	NA	NA	NA	NA	NA	NA	NA	NA	NA	NA	NA	NA	NA	NA	NA	NA	NA	NA	NA	NA	NA	NA	NA	NA	NA	NA	0	0	0	0
FBgn0029906	xit	X	No Signal	0.142	0.380113	NotSpec	2.71515	2.88345	3.53458	4.08079	4.11309	3.76423	3.40588	Not	NA	NA	NA	NA	NA	NA	NA	NA	NA	NA	NA	NA	NA	NA	NA	NA	NA	NA	NA	NA	NA	NA	NA	NA	NA	NA	0	0	0	0
FBgn0031773	Fbw5	2	No Signal	NA	0.318565	NotSpec	3.26121	3.07344	2.89313	2.80208	2.84362	2.85741	3.45777	Not	NA	NA	NA	NA	NA	NA	NA	NA	NA	NA	NA	NA	NA	NA	NA	NA	NA	NA	NA	NA	NA	NA	NA	NA	NA	NA	0	0	0	0
FBgn0051038	CG31038	3	No Signal	0.0954	0.499744	NotSpec	6.18494	6.48126	5.41763	6.15872	6.20063	1.21813	3.06087	Higher	allFRT	BUR	OVD	SR	ST	PO	NA	NA	Down	NA	Transient Down	NA	NA	NA	NA	NA	NA	NA	NA	NA	NA	NA	NA	NA	NA	NA	0	0	1	0
FBgn0262962	CG43273	3	No Signal	NA	0.461445	NotSpec	3.06279	2.37155	2.55748	2.14736	2.20292	2.96868	0.883659	Higher	allFRT	BUR	OVD	SR	ST	PO	FB	NA	NA	NA	NA	NA	NA	NA	NA	NA	NA	NA	NA	NA	NA	NA	NA	NA	NA	NA	0	0	0	0
FBgn0050342	Prp38	2	No Signal	0.0387	0.639892	NotSpec	3.65592	3.46225	3.45085	3.77507	3.9681	4.38614	5.22789	Not	NA	NA	NA	NA	NA	NA	NA	NA	NA	NA	NA	NA	NA	NA	NA	NA	NA	NA	NA	NA	NA	NA	NA	NA	NA	NA	0	0	0	0
FBgn0050343	CG30343	2	No Signal	0.1435	0.258027	NotSpec	1.69302	1.60717	1.39562	1.06995	1.65596	1.65151	0.905001	Not	NA	NA	NA	NA	NA	NA	NA	NA	NA	NA	NA	NA	NA	NA	NA	NA	NA	NA	NA	NA	NA	NA	NA	NA	NA	NA	0	0	0	0
FBgn0050344	CG30344	2	No Signal	0.0629	0.541671	NotSpec	6.80332	6.57147	6.66687	6.94049	7.48374	5.24852	4.71282	Higher	NA	BUR	NA	NA	ST	PO	NA	NA	NA	NA	NA	NA	NA	NA	NA	NA	NA	NA	NA	NA	NA	NA	NA	NA	NA	NA	0	0	0	0
FBgn0050345	CG30345	2	No Signal	0.08	0.81917	NotSpec	2.5905	4.37936	3.37957	5.28205	6.24469	2.72214	2.14964	Higher	NA	NA	OVD	NA	ST	PO	NA	NA	NA	NA	NA	NA	NA	NA	NA	NA	NA	Down	Down	Persist Down	NA	NA	NA	NA	NA	NA	0	0	1	1
FBgn0027504	CG8878	2	No Signal	0.1319	0.540531	NotSpec	3.5555	3.83511	3.75412	3.68956	3.78719	2.35523	4.62666	Not	NA	NA	NA	NA	NA	NA	NA	NA	NA	NA	NA	NA	NA	NA	NA	NA	NA	NA	NA	NA	NA	NA	NA	NA	NA	NA	0	0	0	0
FBgn0027505	Rab3-GAP	2	No Signal	0.0685	0.390868	NotSpec	3.40003	3.2734	3.57494	4.50775	4.28412	3.85264	4.56443	Not	NA	NA	NA	NA	NA	NA	NA	NA	NA	NA	NA	NA	NA	NA	NA	NA	NA	NA	NA	NA	NA	NA	NA	NA	NA	NA	0	0	0	0
FBgn0027506	EDTP	2	No Signal	0.0451	0.547943	NotSpec	4.72945	4.81443	4.79133	5.03753	5.03179	6.17257	6.3204	Not	NA	NA	NA	NA	NA	NA	NA	NA	Down	NA	Transient Down	NA	NA	NA	NA	NA	NA	NA	NA	NA	NA	NA	NA	NA	NA	NA	0	0	1	0
FBgn0027507	CG1344	2	No Signal	0.2573	0.602839	NotSpec	3.77387	4.14081	3.98511	3.73685	5.01581	3.40922	3.26324	Not	NA	NA	NA	NA	NA	NA	NA	NA	NA	NA	NA	NA	NA	NA	NA	NA	NA	NA	NA	NA	NA	NA	NA	NA	NA	NA	0	0	0	0
FBgn0027503	CG11970	3	No Signal	0.1329	0.30178	NotSpec	2.85686	3.24285	3.03404	3.03214	3.19153	1.73113	3.38374	Not	NA	NA	NA	NA	NA	NA	NA	NA	NA	NA	NA	NA	NA	NA	NA	NA	NA	NA	NA	NA	NA	NA	NA	NA	NA	NA	0	0	0	0
FBgn0266064	GlyS	3	No Signal	0.001	0.781815	NotSpec	6.61513	6.39163	5.94479	6.32339	6.44915	8.83922	7.59416	Not	NA	NA	NA	NA	NA	NA	NA	NA	Down	NA	Transient Down	NA	NA	NA	NA	NA	NA	NA	NA	NA	NA	NA	NA	Down	NA	Transient Down	0	0	1	0
FBgn0029822	CG12236	X	No Signal	0.0972	0.684239	NotSpec	2.7433	3.1734	2.93319	3.07923	2.65307	1.28145	4.2649	Not	NA	NA	NA	NA	NA	NA	NA	NA	NA	NA	NA	NA	NA	NA	NA	NA	NA	NA	NA	NA	NA	NA	NA	NA	NA	NA	0	0	0	0
FBgn0027508	Tnks	3	No Signal	NA	0.663846	NotSpec	3.97145	4.03646	3.80871	5.054	4.70511	3.22295	5.77924	Not	NA	NA	NA	NA	NA	NA	NA	NA	NA	NA	NA	NA	NA	NA	NA	NA	NA	NA	NA	NA	NA	NA	NA	NA	NA	NA	0	0	0	0
FBgn0260439	Pp2A-29B	2	No Signal	0.0233	0.188328	NotSpec	7.31029	7.25932	7.15171	7.39834	6.96552	6.6931	7.13091	Not	NA	NA	NA	NA	NA	NA	NA	NA	NA	NA	NA	NA	NA	NA	NA	NA	NA	NA	NA	NA	NA	NA	NA	NA	NA	NA	0	0	0	0
FBgn0058469	lncRNA:CR40469	X	No Signal	NA	0.639486	NotSpec	9.01692	8.4114	9.2952	6.84008	6.39237	8.08012	5.13305	Higher	Epithelial	BUR	OVD	SR	NA	NA	FB	NA	NA	NA	NA	NA	NA	NA	NA	NA	NA	NA	NA	NA	NA	NA	NA	NA	NA	NA	0	0	0	0
FBgn0260386	mtg	3	Signal	0.0339	0.925555	SR	4.58057	2.61809	6.75615	3.61179	3.15167	0.182224	0.607013	Higher	allFRT	BUR	OVD	SR	ST	PO	NA	NA	Down	NA	Transient Down	NA	NA	NA	NA	NA	NA	NA	NA	NA	NA	NA	NA	NA	NA	NA	0	0	1	0
FBgn0037518	CG2641	3	No Signal	0.0798	0.227491	NotSpec	2.56162	2.5967	2.76809	2.41832	2.72876	2.4706	1.79467	Not	NA	NA	NA	NA	NA	NA	NA	NA	NA	NA	NA	NA	NA	NA	NA	NA	NA	NA	NA	NA	NA	NA	NA	NA	NA	NA	0	0	0	0
FBgn0030239	CG17333	X	No Signal	0.112	0.921549	FB	4.34167	4.28256	4.53491	4.80227	4.69972	8.23749	4.94413	Not	NA	NA	NA	NA	NA	NA	FB	NA	NA	NA	NA	NA	NA	NA	NA	NA	NA	NA	NA	NA	NA	NA	NA	NA	NA	NA	0	0	0	0
FBgn0065032	Arpc3B	X	No Signal	0.0589	0.827069	NotSpec	1.55495	1.51201	3.60471	5.52467	4.83866	1.30289	1.88389	Higher	NA	NA	NA	SR	ST	PO	NA	NA	Up	NA	Transient Up	NA	NA	NA	NA	NA	NA	NA	NA	NA	NA	NA	NA	NA	NA	NA	1	0	0	0
FBgn0037513	pyd3	3	No Signal	0.0403	0.637558	NotSpec	6.27126	6.98718	6.37415	4.67296	4.24451	7.27915	3.33406	Higher	Epithelial	BUR	OVD	SR	NA	NA	FB	NA	NA	NA	NA	NA	NA	NA	NA	NA	NA	NA	NA	NA	NA	NA	NA	Down	NA	Transient Down	0	0	0	0
FBgn0065035	AlkB	X	No Signal	0.2517	0.410423	NotSpec	2.87113	2.87175	2.97605	3.79477	3.45711	3.5309	2.703	Not	NA	NA	NA	NA	NA	NA	NA	NA	Up	NA	Transient Up	NA	NA	NA	NA	NA	NA	NA	NA	NA	NA	NA	NA	NA	NA	NA	1	0	0	0
FBgn0035028	Start1	2	No Signal	0.0788	0.429939	NotSpec	3.74865	3.6734	3.7852	4.64671	4.45135	4.23337	4.91435	Not	NA	NA	NA	NA	NA	NA	NA	NA	NA	NA	NA	NA	NA	NA	NA	NA	NA	NA	NA	NA	NA	NA	NA	NA	NA	NA	0	0	0	0
FBgn0036179	CG7368	3	No Signal	0.0425	0.761832	NotSpec	0.716333	1.00116	0.617144	0.182924	0.0512777	0	0.11518	Higher	NA	NA	OVD	NA	NA	NA	NA	NA	NA	NA	NA	NA	NA	NA	NA	NA	NA	NA	NA	NA	NA	NA	NA	NA	NA	NA	0	0	0	0
FBgn0033457	Ntmt	2	No Signal	0.0886	0.478581	NotSpec	4.63397	4.19395	4.08089	4.17935	3.8328	5.3776	5.34037	Not	NA	NA	NA	NA	NA	NA	NA	NA	NA	NA	NA	NA	NA	NA	NA	NA	NA	NA	NA	NA	NA	NA	NA	NA	NA	NA	0	0	0	0
FBgn0036173	CG7394	3	Signal	0.0555	0.678893	NotSpec	4.9657	4.56967	4.36302	3.795	3.59095	6.01056	4.74312	Not	NA	NA	NA	NA	NA	NA	NA	NA	Up	NA	Transient Up	NA	NA	NA	NA	NA	NA	NA	NA	NA	NA	NA	NA	NA	NA	NA	1	0	0	0
FBgn0033451	Marc	2	No Signal	0.0899	0.895965	NotSpec	3.5216	3.39661	3.939	4.03592	3.45575	7.28539	5.24879	Not	NA	NA	NA	NA	NA	NA	NA	NA	NA	NA	NA	NA	NA	NA	NA	NA	NA	NA	NA	NA	NA	NA	NA	NA	NA	NA	0	0	0	0
FBgn0030318	rho-4	X	No Signal	0.0083	0.756543	NotSpec	4.21839	4.12274	4.49167	6.7065	6.00747	3.32332	4.59823	Higher	NA	NA	NA	NA	ST	NA	NA	NA	NA	NA	NA	NA	NA	NA	NA	NA	NA	Down	NA	Transient Down	NA	NA	NA	NA	NA	NA	0	0	1	0
FBgn0038269	Rrp6	3	No Signal	0.1469	0.45529	NotSpec	2.56354	3.3264	3.10627	3.07035	3.61359	1.2429	2.89068	Not	NA	NA	NA	NA	NA	NA	NA	NA	NA	NA	NA	NA	NA	NA	NA	NA	NA	NA	NA	NA	NA	NA	NA	NA	NA	NA	0	0	0	0
FBgn0040735	CG16836	2	Signal	NA	0.9802	FB	3.75452	3.36908	4.37241	3.84887	4.31633	9.34895	2.16307	Higher	NA	BUR	NA	SR	NA	PO	FB	NA	NA	NA	NA	NA	NA	NA	NA	NA	NA	NA	NA	NA	NA	NA	NA	NA	NA	NA	0	0	0	0
FBgn0040736	IM3	2	Signal	NA	0.932829	FB	5.60305	6.4625	7.23322	6.76579	7.40881	10.4732	3.64318	Higher	allFRT	BUR	OVD	SR	ST	PO	FB	NA	Up	NA	Transient Up	Up	NA	Transient Up	NA	NA	NA	NA	NA	NA	NA	NA	NA	NA	NA	NA	2	1	0	0
FBgn0040732	CG16926	2	No Signal	0.0807	0.962764	FB	6.27055	7.48888	7.85169	7.22172	8.09271	11.9955	2.99026	Higher	allFRT	BUR	OVD	SR	ST	PO	FB	NA	Down	NA	Transient Down	NA	NA	NA	NA	NA	NA	NA	NA	NA	NA	NA	NA	NA	NA	NA	0	0	1	0
FBgn0040733	CG15068	2	Signal	NA	0.986224	FB	5.12358	5.27446	6.50035	5.83809	6.27638	11.9501	5.09369	Not	NA	NA	NA	NA	NA	NA	FB	NA	NA	NA	NA	NA	NA	NA	NA	NA	NA	NA	NA	NA	NA	NA	NA	NA	NA	NA	0	0	0	0
FBgn0051694	CG31694	2	No Signal	0.0354	0.32784	NotSpec	5.59936	5.51246	5.46965	6.49645	6.54306	6.51448	6.67268	Not	NA	NA	NA	NA	NA	NA	NA	NA	Up	NA	Transient Up	NA	NA	NA	NA	NA	NA	NA	NA	NA	NA	NA	NA	NA	NA	NA	1	0	0	0
FBgn0035020	CG13585	2	No Signal	0.2451	0.600245	NotSpec	8.29885	7.54359	8.81308	9.8159	9.31133	9.06162	5.47644	Higher	allFRT	BUR	OVD	SR	ST	PO	FB	NA	NA	NA	NA	NA	NA	NA	NA	NA	NA	NA	NA	NA	NA	NA	NA	NA	NA	NA	0	0	0	0
FBgn0020767	Spred	2	No Signal	NA	0.560777	NotSpec	4.22258	4.34683	3.93249	3.66378	3.43572	3.30331	4.99926	Not	NA	NA	NA	NA	NA	NA	NA	NA	NA	NA	NA	NA	NA	NA	NA	NA	NA	NA	NA	NA	NA	NA	NA	NA	NA	NA	0	0	0	0
FBgn0035021	CG4622	2	No Signal	0.1723	0.438872	NotSpec	2.8974	3.09833	2.96379	2.76567	2.86948	1.98447	3.54324	Not	NA	NA	NA	NA	NA	NA	NA	NA	NA	NA	NA	NA	NA	NA	NA	NA	NA	NA	NA	NA	NA	NA	NA	NA	NA	NA	0	0	0	0
FBgn0005585	Calr	3	Signal	0.0177	0.788487	NotSpec	7.94429	8.0816	9.84493	10.5955	11.4587	8.3818	8.01675	Higher	Gland	NA	NA	NA	ST	PO	NA	NA	NA	NA	NA	NA	NA	NA	NA	NA	NA	NA	NA	NA	NA	NA	NA	Up	NA	Transient Up	0	0	0	0
FBgn0036397	Nprl3	3	No Signal	0.0172	0.784844	NotSpec	2.42031	2.60561	2.54175	2.65107	2.33311	2.01611	4.43472	Not	NA	NA	NA	NA	NA	NA	NA	NA	NA	NA	NA	NA	NA	NA	NA	NA	NA	NA	NA	NA	NA	NA	NA	NA	NA	NA	0	0	0	0
FBgn0036396	CG17359	3	No Signal	0.4254	0.876386	NotSpec	1.98354	1.58944	1.52854	1.69552	1.27426	1.38386	4.1157	Not	NA	NA	NA	NA	NA	NA	NA	NA	NA	NA	NA	NA	NA	NA	NA	NA	NA	NA	NA	NA	NA	NA	NA	NA	NA	NA	0	0	0	0
FBgn0036398	upSET	3	No Signal	0.1119	0.415352	NotSpec	3.25938	3.73301	2.97443	2.88594	3.48624	2.3634	2.99217	Not	NA	NA	NA	NA	NA	NA	NA	NA	NA	NA	NA	NA	NA	NA	NA	NA	NA	NA	NA	NA	NA	NA	NA	NA	NA	NA	0	0	0	0
FBgn0019938	RpI1	2	No Signal	0.0469	0.408816	NotSpec	2.96702	3.45358	3.16481	4.09839	3.8809	3.24923	4.2321	Not	NA	NA	NA	NA	NA	NA	NA	NA	Up	NA	Transient Up	NA	NA	NA	NA	NA	NA	NA	NA	NA	NA	NA	NA	Up	NA	Transient Up	1	0	0	0
FBgn0035025	uri	2	No Signal	0.1812	0.634613	NotSpec	1.87607	2.11983	2.04638	1.71914	2.21277	0.531917	3.01436	Not	NA	NA	NA	NA	NA	NA	NA	NA	NA	NA	NA	NA	NA	NA	NA	NA	NA	NA	NA	NA	NA	NA	NA	NA	NA	NA	0	0	0	0
FBgn0035026	Fcp1	2	No Signal	0.0599	0.805894	NotSpec	2.53197	2.81031	2.50272	3.03074	2.83024	1.82289	4.80036	Not	NA	NA	NA	NA	NA	NA	NA	NA	NA	NA	NA	NA	NA	NA	NA	NA	NA	NA	NA	NA	NA	NA	NA	NA	NA	NA	0	0	0	0
FBgn0264834	lncRNA:CR44042	2	No Signal	NA	0.895126	NotSpec	0.773629	0.661121	2.2333	0.284566	0.559631	0.270571	0.189548	Higher	NA	NA	NA	SR	NA	NA	NA	NA	NA	NA	NA	NA	NA	NA	NA	NA	NA	NA	NA	NA	NA	NA	NA	NA	NA	NA	0	0	0	0
FBgn0039946	ATbp	X	No Signal	0.0781	0.47866	NotSpec	1.11992	1.39768	1.69676	1.43261	1.78721	0.777852	2.05997	Not	NA	NA	NA	NA	NA	NA	NA	NA	NA	NA	NA	NA	NA	NA	NA	NA	NA	NA	NA	NA	NA	NA	NA	NA	NA	NA	0	0	0	0
FBgn0035027	CG3511	2	No Signal	0.0283	0.824133	NotSpec	2.79547	3.03413	2.621	2.98943	2.86469	2.69235	5.17155	Not	NA	NA	NA	NA	NA	NA	NA	NA	NA	NA	NA	NA	NA	NA	NA	NA	NA	NA	NA	NA	NA	NA	NA	NA	NA	NA	0	0	0	0
FBgn0051961	TBCC	2	No Signal	0.0552	0.446898	NotSpec	2.93714	2.9693	3.22409	2.27991	2.71598	0.685544	2.36902	Not	NA	NA	NA	NA	NA	NA	NA	NA	NA	NA	NA	NA	NA	NA	NA	NA	NA	NA	NA	NA	NA	NA	NA	NA	NA	NA	0	0	0	0
FBgn0267337	rn	3	No Signal	NA	0.862625	NotSpec	4.7977	1.87099	5.24763	0.13115	0.944557	0	0	Higher	NA	BUR	NA	SR	NA	NA	NA	NA	NA	NA	NA	NA	NA	NA	NA	NA	NA	NA	NA	NA	NA	NA	NA	NA	NA	NA	0	0	0	0
FBgn0267336	Glut4EF	3	No Signal	NA	0.651011	NotSpec	3.0765	4.01875	3.37128	2.33543	2.71102	2.22532	1.48156	Higher	NA	BUR	OVD	NA	NA	NA	NA	NA	NA	NA	NA	NA	NA	NA	NA	NA	NA	NA	NA	NA	NA	NA	NA	NA	NA	NA	0	0	0	0
FBgn0267330	KdelR	2	No Signal	0.0086	0.677305	NotSpec	6.20629	6.41887	7.16389	8.78161	8.91444	6.88508	6.27107	Higher	Gland	NA	NA	NA	ST	PO	NA	NA	Up	NA	Transient Up	NA	NA	NA	NA	NA	NA	NA	NA	NA	NA	NA	NA	Up	NA	Transient Up	1	0	0	0
FBgn0265784	CrebB	X	No Signal	0.0673	0.403229	NotSpec	4.69436	5.12169	4.78355	4.26244	4.98947	2.75569	5.32512	Not	NA	NA	NA	NA	NA	NA	NA	NA	NA	NA	NA	NA	NA	NA	NA	NA	NA	NA	NA	NA	NA	NA	NA	NA	NA	NA	0	0	0	0
FBgn0021967	ND-PDSW	2	No Signal	0.0459	0.851869	NotSpec	7.36652	6.6717	6.41304	5.93245	5.69209	9.3168	6.74089	Not	NA	NA	NA	NA	NA	NA	FB	NA	NA	NA	NA	NA	NA	NA	NA	NA	NA	NA	NA	NA	NA	NA	NA	NA	NA	NA	0	0	0	0
FBgn0260746	Ect3	3	Signal	0.0782	0.822364	NotSpec	0.354877	0.531383	0.961322	4.59116	0.945093	3.22582	3.87497	Not	NA	NA	NA	NA	NA	NA	NA	NA	NA	NA	NA	Up	NA	Transient Up	Up	NA	Transient Up	Up	NA	Transient Up	Up	Up	Persist Up	NA	NA	NA	4	2	0	0
FBgn0264785	Hph	3	No Signal	0.1041	0.299768	NotSpec	5.41574	6.15614	5.47909	6.05815	6.09158	4.3863	6.21706	Not	NA	NA	NA	NA	NA	NA	NA	NA	Down	NA	Transient Down	NA	NA	NA	NA	NA	NA	NA	NA	NA	NA	NA	NA	NA	NA	NA	0	0	1	0
FBgn0022774	Oat	3	No Signal	0.0418	0.927956	FB	4.10897	5.53055	4.63396	3.85653	4.23611	8.41977	4.99822	Not	NA	NA	NA	NA	NA	NA	FB	NA	NA	NA	NA	NA	NA	NA	NA	NA	NA	NA	NA	NA	NA	NA	NA	NA	NA	NA	0	0	0	0
FBgn0030217	CG2124	X	No Signal	0.1061	0.673309	NotSpec	1.73344	1.60194	1.54191	1.78778	1.53618	2.59903	3.17019	Not	NA	NA	NA	NA	NA	NA	NA	NA	NA	NA	NA	NA	NA	NA	NA	NA	NA	NA	NA	NA	NA	NA	NA	NA	NA	NA	0	0	0	0
FBgn0267253	CG32700	X	No Signal	0.012	0.953957	ST	0.643088	1.13267	1.6266	4.79313	2.0699	0.424763	0	Higher	NA	NA	OVD	NA	ST	NA	NA	NA	NA	NA	NA	NA	NA	NA	NA	NA	NA	NA	NA	NA	NA	NA	NA	NA	NA	NA	0	0	0	0
FBgn0020653	Trxr-1	X	No Signal	0.0887	0.48702	NotSpec	6.91531	6.79485	6.976	6.70466	6.36927	7.21589	7.80922	Not	NA	NA	NA	NA	NA	NA	NA	NA	Up	NA	Transient Up	NA	NA	NA	NA	NA	NA	NA	NA	NA	NA	NA	NA	NA	NA	NA	1	0	0	0
FBgn0023506	Es2	X	No Signal	0.0912	0.739115	NotSpec	3.36448	3.16457	3.20883	3.31397	2.75883	2.8778	4.94274	Not	NA	NA	NA	NA	NA	NA	NA	NA	NA	NA	NA	NA	NA	NA	NA	NA	NA	NA	NA	NA	NA	NA	NA	NA	NA	NA	0	0	0	0
FBgn0023507	D2hgdh	X	No Signal	0.0152	0.933346	FB	6.53308	6.00478	5.88836	5.77439	5.93817	9.88761	5.70949	Not	NA	NA	NA	NA	NA	NA	FB	NA	NA	NA	NA	NA	NA	NA	NA	NA	NA	NA	NA	NA	NA	NA	NA	NA	NA	NA	0	0	0	0
FBgn0023508	Ocrl	X	No Signal	0.0253	0.884077	NotSpec	4.74303	5.34624	5.89641	5.21367	8.232	3.15702	5.37067	Higher	NA	NA	NA	NA	NA	PO	NA	NA	Down	NA	Transient Down	NA	NA	NA	NA	NA	NA	NA	NA	NA	NA	NA	NA	NA	NA	NA	0	0	1	0
FBgn0053995	CG33995	2	No Signal	0.0017	0.797439	NotSpec	3.35937	2.90115	2.14492	1.24184	0	0	0	Higher	NA	NA	OVD	NA	NA	NA	NA	NA	NA	NA	NA	NA	NA	NA	NA	NA	NA	NA	NA	NA	Up	Up	Persist Up	NA	NA	NA	1	1	0	0
FBgn0035851	MED24	3	No Signal	NA	0.705029	NotSpec	2.77008	2.85431	2.78741	3.57016	3.06356	1.63576	4.50092	Not	NA	NA	NA	NA	NA	NA	NA	NA	NA	NA	NA	NA	NA	NA	NA	NA	NA	NA	NA	NA	NA	NA	NA	NA	NA	NA	0	0	0	0
FBgn0035850	Atg18a	3	No Signal	0.0395	0.47403	NotSpec	4.75846	4.81946	4.77177	5.86776	5.45557	6.21522	5.71187	Not	NA	NA	NA	NA	NA	NA	NA	NA	Down	NA	Transient Down	NA	NA	NA	NA	NA	NA	NA	NA	NA	NA	NA	NA	NA	NA	NA	0	0	1	0
FBgn0035854	CG8005	3	No Signal	0.0354	0.627123	NotSpec	2.01923	1.68562	1.91002	2.86874	2.48401	3.99536	3.95574	Not	NA	NA	NA	NA	NA	NA	NA	NA	Up	NA	Transient Up	Up	NA	Transient Up	NA	NA	NA	NA	NA	NA	NA	NA	NA	NA	NA	NA	2	1	0	0
FBgn0028622	qsm	2	Signal	0.0466	0.733887	NotSpec	5.86541	4.96533	5.31944	3.6635	2.34951	0.771265	2.77452	Higher	Epithelial	BUR	OVD	SR	NA	NA	NA	NA	NA	NA	NA	Down	NA	Transient Down	NA	NA	NA	NA	NA	NA	NA	NA	NA	NA	NA	NA	0	0	1	1
FBgn0032494	CG5945	2	Signal	0.1542	0.792935	NotSpec	8.01333	5.36135	6.24816	8.29889	3.43691	1.29023	2.85829	Higher	NA	BUR	OVD	SR	ST	NA	NA	NA	NA	NA	NA	NA	NA	NA	Up	NA	Transient Up	Down	NA	Transient Down	NA	NA	NA	NA	NA	NA	1	0	1	0
FBgn0032495	CG16820	2	Signal	0.1267	0.727687	NotSpec	3.59716	3.02234	2.43846	2.00179	2.0496	0.124622	0.442083	Higher	allFRT	BUR	OVD	SR	ST	PO	NA	NA	Down	NA	Transient Down	NA	NA	NA	NA	NA	NA	Down	NA	Transient Down	NA	NA	NA	NA	NA	NA	0	0	2	0
FBgn0032499	Uvrag	2	No Signal	0.0758	0.675755	NotSpec	3.8067	3.66567	3.47494	3.97016	3.573	3.76814	5.26767	Not	NA	NA	NA	NA	NA	NA	NA	NA	NA	NA	NA	NA	NA	NA	NA	NA	NA	NA	NA	NA	NA	NA	NA	NA	NA	NA	0	0	0	0
FBgn0001247	Ide	3	No Signal	0.0304	0.327683	NotSpec	5.01865	5.2066	4.91556	4.94303	5.01462	3.03689	4.09032	Not	NA	NA	NA	NA	NA	NA	NA	NA	Down	NA	Transient Down	NA	NA	NA	NA	NA	NA	NA	NA	NA	NA	NA	NA	Up	NA	Transient Up	0	0	1	0
FBgn0053196	dpy	2	Signal	NA	0.91109	OVD	5.88228	8.13889	5.77002	4.05056	4.51716	0.424596	0.554177	Higher	allFRT	BUR	OVD	SR	ST	PO	NA	NA	NA	NA	NA	NA	NA	NA	NA	NA	NA	NA	Up	Persist Up	NA	NA	NA	NA	NA	NA	0	1	0	0
FBgn0053193	sav	3	No Signal	0.0334	0.827309	NotSpec	3.73339	3.44081	3.40531	3.58924	3.07848	3.033	5.81811	Not	NA	NA	NA	NA	NA	NA	NA	NA	NA	NA	NA	NA	NA	NA	NA	NA	NA	NA	NA	NA	NA	NA	NA	NA	NA	NA	0	0	0	0
FBgn0015039	Cyp9b2	2	No Signal	0.0948	0.725071	NotSpec	5.34161	2.93196	3.36198	7.12991	4.91507	7.29355	5.1063	Higher	NA	NA	NA	NA	ST	NA	NA	NA	NA	NA	NA	NA	NA	NA	NA	NA	NA	NA	NA	NA	NA	NA	NA	NA	NA	NA	0	0	0	0
FBgn0053198	pen-2	2	No Signal	0.0009	0.455659	NotSpec	2.92946	2.68358	3.13788	2.80092	2.83838	3.56942	2.18283	Not	NA	NA	NA	NA	NA	NA	NA	NA	NA	NA	NA	NA	NA	NA	NA	NA	NA	NA	NA	NA	NA	NA	NA	NA	NA	NA	0	0	0	0
FBgn0053199	CG33199	2	No Signal	0.1746	0.621253	NotSpec	7.28389	6.47242	5.87409	5.51193	5.94329	7.63818	5.52334	Not	NA	NA	NA	NA	NA	NA	NA	NA	NA	NA	NA	NA	NA	NA	NA	NA	NA	NA	NA	NA	NA	NA	NA	NA	NA	NA	0	0	0	0
FBgn0034509	Obp57c	2	Signal	0.1928	0.973585	BUR	8.47998	4.35338	3.95778	3.32059	2.72772	2.4628	2.11201	Higher	NA	BUR	NA	SR	NA	NA	NA	NA	NA	Up	Persist Up	NA	NA	NA	NA	NA	NA	NA	NA	NA	NA	Up	Persist Up	NA	NA	NA	0	1	0	0
FBgn0261706	asRNA:CR42742	2	No Signal	NA	0.972503	ST	4.59059	5.07196	6.18911	10.4978	5.97178	5.64216	0	Higher	allFRT	BUR	OVD	SR	ST	PO	FB	NA	NA	NA	NA	NA	NA	NA	NA	NA	NA	NA	NA	NA	NA	NA	NA	NA	NA	NA	0	0	0	0
FBgn0005636	nvy	2	No Signal	NA	0.574444	NotSpec	1.34096	0.790228	1.65954	0.309458	0.447482	1.74718	0.99541	Not	NA	NA	NA	NA	NA	NA	NA	NA	NA	NA	NA	NA	NA	NA	NA	NA	NA	NA	NA	NA	NA	NA	NA	NA	NA	NA	0	0	0	0
FBgn0052821	CR32821	X	No Signal	NA	0.980024	BUR	3.52553	0.58976	0.499333	0.0943591	0.183611	0.126554	0.0659886	Higher	NA	BUR	NA	NA	NA	NA	NA	NA	Up	NA	Transient Up	NA	NA	NA	NA	NA	NA	NA	NA	NA	NA	NA	NA	NA	NA	NA	1	0	0	0
FBgn0005631	robo1	2	No Signal	0.035	0.539733	NotSpec	3.16391	3.64342	3.33598	2.83374	3.14989	0.413077	0.433926	Higher	allFRT	BUR	OVD	SR	ST	PO	NA	NA	Down	NA	Transient Down	NA	NA	NA	NA	NA	NA	NA	NA	NA	NA	NA	NA	NA	NA	NA	0	0	1	0
FBgn0019936	RpS20	3	No Signal	0.015	0.529562	NotSpec	8.56806	8.42918	8.65533	9.45726	9.66958	9.98087	7.71925	Not	NA	NA	NA	NA	NA	NA	NA	NA	NA	NA	NA	NA	NA	NA	NA	NA	NA	NA	NA	NA	NA	NA	NA	NA	NA	NA	0	0	0	0
FBgn0003062	Fib	2	No Signal	0.0243	0.719837	NotSpec	3.39497	3.67162	3.72052	5.0193	4.73203	7.0403	7.0238	Not	NA	NA	NA	NA	NA	NA	NA	NA	Up	NA	Transient Up	Up	NA	Transient Up	Up	NA	Transient Up	NA	NA	NA	NA	NA	NA	NA	NA	NA	3	1	0	0
FBgn0035879	GAPcenA	3	No Signal	0.0455	0.372177	NotSpec	4.6376	4.47432	4.53584	4.86967	4.68763	2.10501	3.5819	Not	NA	NA	NA	NA	NA	NA	NA	NA	Down	NA	Transient Down	NA	NA	NA	NA	NA	NA	NA	NA	NA	NA	NA	NA	NA	NA	NA	0	0	1	0
FBgn0003068	per	X	No Signal	NA	0.645012	NotSpec	3.87265	3.84774	4.44868	5.39134	4.84676	3.19305	2.15814	Higher	NA	NA	NA	SR	ST	PO	NA	NA	Down	Down	Persist Down	NA	NA	NA	NA	NA	NA	Down	Down	Persist Down	NA	NA	NA	NA	NA	NA	0	0	2	2
FBgn0035878	CG7182	3	No Signal	0.0542	0.901787	WF	4.10113	4.11427	3.82995	4.55616	4.00279	5.58631	7.79521	Not	NA	NA	NA	NA	NA	NA	NA	NA	Up	NA	Transient Up	NA	NA	NA	NA	NA	NA	NA	NA	NA	NA	NA	NA	NA	NA	NA	1	0	0	0
FBgn0037008	mTerf3	3	No Signal	0.1165	0.22669	NotSpec	2.92574	2.84304	2.63674	2.87404	2.86613	2.31826	1.85307	Not	NA	NA	NA	NA	NA	NA	NA	NA	NA	NA	NA	NA	NA	NA	NA	NA	NA	NA	NA	NA	NA	NA	NA	NA	NA	NA	0	0	0	0
[truncated: 7,989 more rows]
